# Supplementary material for: Touch receptor end-organ innervation and function requires sensory neuron expression of the transcription factor Meis2
Source: bioRxiv preprint, doi:10.1101/2022.04.28.489889, version 4 (2023-11-06)
Supplement: Figure 3 Supplementary Table1 [file 489889_file08.xlsx]

## Sheet: 221206_analysis_100 reads
gene_name	GeneID	logFC_islet-WT	AveExpr_isl1-WT	t_isl1-WT	P,Value_isl1-WT	adj,P,Val_isl1-WT	B_isl1-WT	logFC_Meis2-WT	AveExpr_Meis2-WT	t_Meis2-WT	P,Value_Meis2-WT	adj,P,Val_Meis2-WT	B_Meis2-WT	logFC_Meis2-isl1	AveExpr_Meis2-isl1	t_Meis2-isl1	P,Value_Meis2-isl1	adj,P,Val_Meis2-isl1	B_Meis2-isl1	WT1	WT2	WT3	Isl1-1	Isl1-2	Isl1-3	Meis2-1	Meis2-2	Meis2-3	sum
0610009B22Rik	ENSMUSG00000007777,9	0.184322	3.88815	0.962662	0.383957	0.96692	-7.7411	0.110514	3.822	0.644081	0.550348	0.761216	-7.6213	-0.0768008	3.93605	-0.772293	0.477354	0.644839	-7.6626	364	523	558	496	541	591	485	492	422	4472
0610010F05Rik	ENSMUSG00000042208,15	0.049734	7.48513	0.299182	0.777955	0.96692	-8.59026	0.0529279	7.45807	0.306144	0.772905	0.905216	-8.15097	-0.000457809	7.50437	-0.00387955	0.997066	0.998073	-8.47236	4760	6745	6769	5871	6233	6686	6491	5247	5369	54171
0610012G03Rik	ENSMUSG00000107002,1	0.0262055	4.58875	0.248859	0.814288	0.96692	-8.30297	0.0691093	4.58196	0.730274	0.500805	0.71818	-7.64283	0.0395487	4.61532	0.482448	0.651347	0.790385	-7.96935	904	761	785	906	864	736	760	862	715	7293
0610030E20Rik	ENSMUSG00000058706,5	-0.0114788	3.69796	-0.24135	0.819759	0.96692	-8.1949	-0.0816011	3.63456	-0.681623	0.528371	0.742483	-7.56906	-0.073443	3.64951	-0.669497	0.534989	0.69811	-7.69465	411	454	471	473	431	426	336	456	364	3822
0610040J01Rik	ENSMUSG00000060512,7	-0.12989	1.97797	-0.526385	0.623207	0.96692	-7.77691	-0.161817	1.9372	-2.64162	0.04997	0.129487	-4.98373	-0.0367942	1.88978	-0.145175	0.890656	0.936918	-7.56837	147	135	140	192	108	102	109	119	115	1167
1110002E22Rik	ENSMUSG00000090066,2	-1.48804	-1.02742	-1.36218	0.236577	0.96692	-6.31996	-0.00308941	-0.316264	-0.00196394	0.998516	0.999253	-7.09645	1.48331	-1.03376	0.956358	0.385952	0.583783	-6.35574	20	10	101	10	8	11	4	124	29	317
1110002L01Rik	ENSMUSG00000071456,6	0.0206459	4.07404	0.269111	0.799594	0.96692	-8.23509	-0.0899302	3.99029	-1.73421	0.148704	0.313391	-6.47713	-0.114207	4.02184	-1.46303	0.207608	0.385918	-6.94851	553	547	614	559	626	562	509	478	477	4925
1110004F10Rik	ENSMUSG00000030663,12	-0.18626	6.55846	-1.10653	0.323442	0.96692	-7.88985	-0.102727	6.57186	-0.557194	0.603493	0.798279	-7.95144	0.0802507	6.49902	1.04625	0.346782	0.540484	-7.75543	4319	3130	2998	3125	2987	2978	3305	2840	2619	28301
1110008P14Rik	ENSMUSG00000039195,4	-0.00270323	5.52205	-0.02879	0.978249	0.998181	-8.44266	-0.00806887	5.49054	-0.0687485	0.948086	0.974851	-8.03582	-0.00837258	5.50981	-0.0975991	0.926319	0.954151	-8.22236	1758	1464	1506	1596	1499	1630	1572	1504	1210	13739
1110012L19Rik	ENSMUSG00000045237,5	-0.0199775	3.80613	-0.168902	0.873109	0.96692	-8.22724	0.067342	3.82084	0.440681	0.67944	0.846646	-7.74695	0.0845975	3.83086	0.737256	0.496473	0.663175	-7.67422	551	464	435	519	478	434	478	534	375	4268
1110018N20Rik	ENSMUSG00000085151,7	-0.0326056	1.80459	-0.12852	0.903212	0.96692	-7.89612	-0.132993	1.72697	-0.558655	0.602574	0.797605	-7.33228	-0.104069	1.72938	-0.679287	0.5293	0.693057	-7.27604	144	136	89	129	132	96	113	93	94	1026
1110032A03Rik	ENSMUSG00000037971,10	0.0293859	4.70928	0.222655	0.833432	0.96692	-8.32417	0.0489917	4.69054	0.336769	0.751154	0.891225	-7.89287	0.0165643	4.72533	0.193961	0.854396	0.916155	-8.10005	1039	844	789	980	914	829	906	893	710	7904
1110032F04Rik	ENSMUSG00000046999,2	-0.306532	1.30781	-0.807403	0.459469	0.96692	-7.43069	0.0911426	1.47598	0.328511	0.756994	0.895292	-7.40223	0.394778	1.34704	1.58874	0.177378	0.338529	-6.23051	61	110	121	63	64	109	91	96	85	800
1110038B12Rik	ENSMUSG00000092203,7	0.0272212	3.89272	0.494389	0.643923	0.96692	-8.11083	0.0962425	3.89817	0.75706	0.486074	0.704715	-7.54377	0.0663104	3.93211	0.573302	0.593057	0.746932	-7.81022	531	491	486	552	491	500	546	543	391	4531
1110038F14Rik	ENSMUSG00000063236,6	-0.0943673	3.20395	-1.27465	0.263535	0.96692	-7.31224	-0.0211154	3.2129	-0.30156	0.776182	0.906921	-7.7239	0.0693819	3.18577	1.32144	0.247664	0.427556	-6.9683	349	317	310	336	297	285	282	305	287	2768
1110046J04Rik	ENSMUSG00000085457,3	-0.200598	2.07899	-1.82139	0.133817	0.96692	-6.44305	-0.224464	2.03877	-2.37609	0.0681038	0.155908	-5.34254	-0.0278061	1.95963	-0.211959	0.841118	0.916155	-7.57043	163	146	154	131	122	153	132	110	119	1230
1110051M20Rik	ENSMUSG00000040591,18	0.117585	5.26775	1.06122	0.341548	0.96692	-7.80259	0.137205	5.24938	1.2817	0.260936	0.479708	-7.16207	0.0159514	5.3291	0.361246	0.733752	0.84934	-8.1265	1074	1412	1328	1409	1305	1417	1286	1265	1241	11737
1110059E24Rik	ENSMUSG00000035171,9	-0.022183	4.58527	-0.357755	0.736488	0.96692	-8.26315	0.0118849	4.57314	0.136573	0.897161	0.953511	-7.93739	0.0312367	4.58303	0.330171	0.75563	0.865958	-8.03716	809	857	812	787	841	823	836	807	642	7214
1110059G10Rik	ENSMUSG00000032551,7	0.000625023	3.78476	0.02964	0.977561	0.998181	-8.24125	-0.0385005	3.73629	-0.499858	0.64023	0.8226	-7.70371	-0.0420756	3.75727	-0.554361	0.604943	0.755386	-7.79265	461	466	484	496	451	471	450	452	354	4085
1110065P20Rik	ENSMUSG00000078570,10	0.0367793	3.61431	0.451212	0.672483	0.96692	-8.09726	0.169629	3.65185	1.9618	0.112233	0.247036	-6.14255	0.12969	3.69138	1.58379	0.178481	0.340318	-6.74527	378	407	456	430	396	451	464	435	372	3789
1300002E11Rik	ENSMUSG00000097290,9	-0.103894	1.65644	-1.37273	0.233512	0.96692	-6.91593	-0.0340931	1.66278	-0.302038	0.77584	0.906701	-7.44881	0.0664329	1.63075	0.627789	0.559687	0.719939	-7.29067	119	109	106	113	104	95	115	98	85	944
1500004A13Rik	ENSMUSG00000098912,7	0.0588718	5.95014	0.499159	0.64081	0.96692	-8.34032	0.0208129	5.90264	0.165252	0.875783	0.944017	-8.05956	-0.0417119	5.95331	-0.374859	0.724257	0.842005	-8.2005	1791	2294	2153	2043	2162	2296	2136	1754	1858	18487
1500009L16Rik	ENSMUSG00000087651,3	-0.088322	4.68132	-0.981178	0.375667	0.96692	-7.81882	0.0067825	4.70042	0.0752988	0.943151	0.972283	-7.95852	0.0919031	4.67661	1.70092	0.154131	0.30058	-6.75095	986	900	831	894	877	791	862	878	742	7761
1500011B03Rik	ENSMUSG00000072694,8	0.0880013	5.9329	0.761228	0.484011	0.96692	-8.15391	0.0950488	5.90769	0.931935	0.397799	0.654083	-7.59269	0.00373096	5.97294	0.060573	0.954217	0.972549	-8.28487	1720	2181	2207	2081	2135	2270	2038	2050	1818	18500
1600012H06Rik	ENSMUSG00000050088,9	-0.0243866	4.96316	-0.188575	0.85853	0.96692	-8.36107	0.0467804	4.96993	0.374887	0.724455	0.872924	-7.9049	0.0678572	4.97907	0.781569	0.472384	0.64434	-7.80954	900	1130	1217	1033	1012	1142	1112	1016	909	9471
1600014C10Rik	ENSMUSG00000054676,15	-0.0109482	4.67912	-0.0803489	0.939366	0.985151	-8.34688	-0.0359913	4.63805	-0.276272	0.794356	0.916169	-7.90944	-0.02864	4.65402	-0.335579	0.751803	0.863123	-8.04506	725	955	976	827	896	905	836	747	757	7624
1600020E01Rik	ENSMUSG00000097048,7	0.0751737	2.23125	0.541347	0.613655	0.96692	-7.8172	-0.0362634	2.14732	-0.290707	0.783962	0.910327	-7.5456	-0.114782	2.2056	-1.37685	0.231179	0.405622	-6.69057	135	183	153	172	147	177	133	149	133	1382
1600029O15Rik	ENSMUSG00000057818,8	0.204482	1.70658	1.326	0.247389	0.96692	-6.98042	0.12635	1.63829	1.50463	0.197918	0.40285	-6.38264	-0.0816464	1.76302	-0.574975	0.592015	0.746805	-7.3572	92	104	115	107	114	141	107	100	101	981
1700001L05Rik	ENSMUSG00000075511,9	-0.0127376	3.36621	-0.0676558	0.948925	0.990963	-8.18036	0.0914129	3.3906	0.505391	0.636629	0.82009	-7.65394	0.10037	3.40513	0.626453	0.560491	0.720722	-7.68157	282	405	386	378	292	394	296	382	356	3171
1700008J07Rik	ENSMUSG00000101225,1	-0.0713933	1.58467	-0.78711	0.470137	0.96692	-7.50736	-0.159851	1.51311	-1.3375	0.243569	0.4619	-6.55684	-0.0929634	1.49878	-0.959613	0.384472	0.582084	-6.97858	99	96	120	102	104	94	88	78	90	871
1700017B05Rik	ENSMUSG00000032300,7	-0.0281035	1.99888	-0.174599	0.868881	0.96692	-7.92653	0.00276771	1.98814	0.0167859	0.987313	0.994175	-7.56644	0.0260391	1.99485	0.142131	0.89293	0.938437	-7.59385	120	135	160	152	110	148	109	126	144	1204
1700019D03Rik	ENSMUSG00000043629,12	-0.0396896	2.0373	-0.183343	0.862401	0.96692	-7.93218	0.0421311	2.04981	0.192468	0.855607	0.933868	-7.55594	0.0779924	2.05254	0.8921	0.416136	0.613567	-7.17439	107	140	189	134	147	135	123	140	136	1251
1700021F05Rik	ENSMUSG00000019797,11	-0.14593	4.24264	-1.01991	0.358812	0.96692	-7.72862	-0.0381682	4.26829	-0.222899	0.833201	0.933868	-7.88535	0.104272	4.21534	0.768131	0.479596	0.646854	-7.71082	804	634	617	682	547	628	727	569	527	5735
1700025G04Rik	ENSMUSG00000032666,16	0.0815629	5.97723	1.38355	0.230405	0.96692	-7.51705	0.0208569	5.91878	0.396938	0.709211	0.86381	-7.9833	-0.0643458	5.98023	-2.05617	0.0991644	0.207497	-6.4627	1921	2105	2263	2414	2122	2142	1935	2019	1842	18763
1700029J07Rik	ENSMUSG00000071103,9	0.0181907	1.3265	0.108744	0.918028	0.97218	-7.7994	0.026705	1.30203	0.163227	0.877288	0.944843	-7.4157	0.00568968	1.33087	0.0607431	0.954089	0.972454	-7.44495	80	104	73	93	76	90	83	85	68	752
1700030J22Rik	ENSMUSG00000031847,8	0.0892284	2.51717	0.627881	0.56018	0.96692	-7.81321	-0.0697858	2.4088	-0.403301	0.704841	0.860934	-7.54694	-0.162566	2.47455	-1.60424	0.173968	0.332891	-6.4735	192	155	227	214	189	204	192	161	142	1676
1700030K09Rik	ENSMUSG00000052794,13	0.076007	2.88305	0.736512	0.49754	0.96692	-7.79508	-0.0432895	2.79456	-0.374872	0.724465	0.872924	-7.62759	-0.122545	2.85317	-2.83194	0.0394492	0.201968	-4.97086	277	214	248	268	253	257	216	238	196	2167
1700037H04Rik	ENSMUSG00000027327,16	0.0297072	5.18899	0.928656	0.399443	0.96692	-7.92622	0.108781	5.20052	2.71412	0.0460838	0.129487	-5.34101	0.0753568	5.23599	1.61426	0.171798	0.329466	-6.93666	1222	1246	1231	1324	1195	1275	1174	1243	1213	11123
1700048O20Rik	ENSMUSG00000043773,5	-0.069184	1.2907	-0.410991	0.699678	0.96692	-7.69798	-0.271618	1.16257	-1.48143	0.20372	0.413112	-6.31426	-0.206578	1.14842	-1.5046	0.197089	0.369804	-6.28563	82	103	73	81	74	90	61	60	72	696
1700052K11Rik	ENSMUSG00000099681,1	0.0438435	2.21861	0.87721	0.424127	0.96692	-7.55488	0.00743364	2.17306	0.0895033	0.932459	0.966311	-7.59655	-0.0406186	2.21586	-0.557271	0.603108	0.754014	-7.47468	144	163	162	167	156	162	140	138	151	1383
1700066M21Rik	ENSMUSG00000038323,3	0.0139185	4.06726	0.0505546	0.96182	0.998181	-8.27647	0.0952128	4.07906	0.367675	0.729473	0.876763	-7.81289	0.0777665	4.10829	0.680921	0.528355	0.692182	-7.76299	389	624	758	528	564	648	590	536	536	5173
1700086L19Rik	ENSMUSG00000071265,10	-0.0568694	3.0729	-0.377473	0.722751	0.96692	-8.05286	-0.223775	2.96047	-2.65217	0.0494397	0.129487	-5.14938	-0.170208	2.95407	-1.16063	0.301919	0.48769	-7.10138	261	311	308	248	277	329	239	219	226	2418
1700086O06Rik	ENSMUSG00000097080,8	-0.0212655	1.70991	-0.0930251	0.929832	0.979168	-7.88179	-0.0804137	1.6513	-0.38075	0.720387	0.870256	-7.41455	-0.0629804	1.66227	-0.371102	0.726872	0.844106	-7.44462	145	95	102	95	125	115	106	86	98	967
1700096K18Rik	ENSMUSG00000101856,1	0.11078	1.58893	1.54154	0.189378	0.96692	-6.6978	0.0733753	1.54138	0.761699	0.483556	0.702374	-7.1484	-0.0406425	1.61733	-0.462049	0.664863	0.799774	-7.38976	93	94	109	118	99	104	103	101	80	901
1700123O20Rik	ENSMUSG00000040822,7	0.120992	4.43849	1.10566	0.323785	0.96692	-7.66307	0.0694375	4.3849	0.616843	0.56667	0.7746	-7.7062	-0.0555435	4.46629	-1.06934	0.337282	0.529072	-7.46483	601	737	807	833	728	768	675	674	685	6508
1810010H24Rik	ENSMUSG00000078607,5	0.1454	1.23659	0.541349	0.613654	0.96692	-7.61418	-0.00475516	1.13087	-0.01592	0.987968	0.994635	-7.39664	-0.152823	1.22652	-1.24775	0.271305	0.449988	-6.60809	53	75	110	84	88	82	73	81	55	701
1810013L24Rik	ENSMUSG00000022507,6	0.0812814	6.15426	0.412859	0.698403	0.96692	-8.40734	0.102768	6.13649	0.541768	0.613251	0.805021	-7.92371	0.0178465	6.1986	0.287954	0.785778	0.887494	-8.26534	1761	2727	2750	2406	2553	2585	2336	2326	2270	21714
1810026B05Rik	ENSMUSG00000101970,6	0.069813	3.46656	0.383269	0.718735	0.96692	-8.10969	0.14747	3.47591	0.85778	0.433557	0.688264	-7.40212	0.0752244	3.53182	0.391923	0.712437	0.833324	-7.842	309	385	419	417	312	449	404	432	291	3418
1810030O07Rik	ENSMUSG00000044148,6	0.147837	4.58554	1.6877	0.157919	0.96692	-6.99187	0.105563	4.53559	0.860526	0.432189	0.68674	-7.5273	-0.04523	4.63036	-0.429972	0.686418	0.814861	-7.99916	689	808	848	909	901	794	738	907	660	7254
1810037I17Rik	ENSMUSG00000054091,9	-0.0455978	3.9272	-0.393272	0.71183	0.96692	-8.16773	0.0886757	3.96534	0.906345	0.409861	0.665028	-7.42089	0.13118	3.96392	1.34583	0.240275	0.418432	-7.08012	461	549	579	497	480	567	557	522	456	4668
1810055G02Rik	ENSMUSG00000035372,2	-0.0481588	4.82157	-0.257072	0.808318	0.96692	-8.32694	-0.102529	4.76625	-0.553373	0.605901	0.799968	-7.78818	-0.0576989	4.762	-0.730935	0.499981	0.666673	-7.82079	1257	855	882	1087	883	901	836	920	747	8368
1810058I24Rik	ENSMUSG00000073155,12	0.00210057	5.55944	0.0447836	0.966174	0.998181	-8.44593	0.0728126	5.56628	1.16742	0.30015	0.533921	-7.31985	0.0674359	5.58815	1.3593	0.236286	0.412729	-7.29392	1499	1618	1718	1684	1542	1632	1525	1702	1405	14325
2010300C02Rik	ENSMUSG00000026090,16	-0.0874093	2.28475	-0.513842	0.631281	0.96692	-7.84401	-0.156984	2.22251	-0.814621	0.455503	0.692601	-7.23312	-0.0737128	2.19865	-0.548135	0.608881	0.758082	-7.47626	203	174	142	165	175	146	158	122	141	1426
2010315B03Rik	ENSMUSG00000074829,10	0.0245571	3.36026	0.252569	0.811589	0.96692	-8.14368	0.0767782	3.35711	0.8113	0.457227	0.692601	-7.4264	0.0492753	3.39102	0.518216	0.628018	0.772265	-7.74899	332	323	390	333	362	371	316	378	309	3114
2010320M18Rik	ENSMUSG00000100691,1	-0.139974	2.59511	-0.748206	0.491105	0.96692	-7.73586	0.00448036	2.63825	0.0217014	0.983599	0.992695	-7.68477	0.141554	2.58804	1.35472	0.237634	0.414588	-6.80385	276	178	206	217	193	182	204	228	164	1848
2210016F16Rik	ENSMUSG00000021550,6	0.0120259	3.50918	0.127244	0.904167	0.96692	-8.19418	0.0159854	3.48226	0.106884	0.919399	0.959058	-7.81092	0.00111233	3.5089	0.00795822	0.993981	0.996279	-7.92924	413	347	404	411	414	353	319	444	317	3422
2210016L21Rik	ENSMUSG00000029559,15	-0.0560494	5.65499	-0.344743	0.745616	0.96692	-8.38571	-0.0965522	5.60652	-0.561847	0.600569	0.796303	-7.86351	-0.0439239	5.59869	-0.674453	0.532104	0.695584	-7.97603	2186	1603	1543	1785	1707	1595	1653	1465	1372	14909
2210408F21Rik	ENSMUSG00000087380,7	-0.0917154	1.58823	-0.738157	0.496631	0.96692	-7.54837	0.00953039	1.60968	0.0575087	0.956561	0.979121	-7.49131	0.0981564	1.58391	0.651845	0.545351	0.70755	-7.26237	117	107	94	103	89	107	119	93	81	910
2210408I21Rik	ENSMUSG00000071252,6	0.0461601	3.30252	0.339376	0.749396	0.96692	-8.10447	0.00622691	3.25431	0.0478097	0.96388	0.982869	-7.78364	-0.0435296	3.29865	-0.6173	0.566015	0.725858	-7.66714	280	388	334	330	357	344	302	300	306	2941
2300009A05Rik	ENSMUSG00000032403,8	0.189553	2.28482	1.35037	0.240056	0.96692	-7.06604	0.00440052	2.16359	0.0357272	0.973003	0.987687	-7.59887	-0.188386	2.27943	-2.22969	0.0802697	0.201968	-5.62276	129	174	167	186	158	192	147	150	129	1432
2310009A05Rik	ENSMUSG00000098332,2	0.0930696	3.00946	0.623517	0.562802	0.96692	-7.90075	0.155358	3.01023	0.933291	0.397169	0.653512	-7.26261	0.0603411	3.07823	0.367833	0.72915	0.845796	-7.76495	237	308	257	261	276	321	314	290	213	2477
2310009B15Rik	ENSMUSG00000079283,2	-0.0450235	1.86229	-0.353674	0.739346	0.96692	-7.84271	0.251094	1.98221	1.68968	0.157173	0.328828	-6.21828	0.29242	1.98059	2.96039	0.0344734	0.201968	-4.62297	110	149	121	123	118	126	154	125	131	1157
2310011J03Rik	ENSMUSG00000020133,8	0.0165173	2.88824	0.11553	0.912939	0.969017	-8.10004	-0.0170736	2.84362	-0.108452	0.918222	0.9585	-7.71291	-0.0374361	2.87206	-0.598998	0.577167	0.735124	-7.59286	305	218	238	269	251	245	209	241	228	2204
2310015A10Rik	ENSMUSG00000097729,2	-0.0542641	2.0708	-0.481874	0.652131	0.96692	-7.82126	0.0123269	2.076	0.115464	0.912962	0.95625	-7.57512	0.063009	2.06863	0.736292	0.497007	0.663681	-7.31251	163	142	134	153	146	125	147	133	122	1265
2310022A10Rik	ENSMUSG00000049643,15	0.0473737	3.36233	0.41768	0.695117	0.96692	-8.07827	-0.0209807	3.30029	-0.251302	0.812451	0.925571	-7.7536	-0.0720935	3.34388	-0.797012	0.464195	0.64434	-7.5366	373	310	356	420	341	320	319	329	282	3050
2310022B05Rik	ENSMUSG00000031983,7	-0.00418532	5.6967	-0.0871961	0.934214	0.981864	-8.45699	0.0471919	5.69402	0.613464	0.568717	0.776055	-7.83731	0.0481438	5.71238	0.665754	0.537175	0.700047	-7.99716	1840	1706	1779	1918	1758	1660	1610	1903	1511	15685
2310033P09Rik	ENSMUSG00000020441,6	-0.201648	3.53228	-0.560591	0.601499	0.96692	-8.02164	-0.137477	3.53587	-0.375999	0.723683	0.872487	-7.73988	0.0608386	3.45437	0.561165	0.600657	0.752272	-7.73447	700	315	345	408	376	328	399	358	299	3528
2310039H08Rik	ENSMUSG00000062619,6	-0.123335	1.88148	-1.73016	0.149814	0.96692	-6.52091	0.162074	1.99447	0.904821	0.410589	0.665536	-7.11055	0.283101	1.95333	1.51596	0.194305	0.365338	-6.46506	127	127	139	130	126	107	121	178	109	1164
2310057M21Rik	ENSMUSG00000040177,10	-0.00512282	4.67284	-0.0468758	0.964596	0.998181	-8.34877	-0.0974055	4.59858	-0.930948	0.398259	0.654083	-7.4684	-0.0961363	4.61717	-1.03333	0.352196	0.547253	-7.52373	758	931	940	862	817	945	772	702	754	7481
2310058D17Rik	ENSMUSG00000085379,1	-0.044435	1.5893	-0.212128	0.841161	0.96692	-7.83471	-0.161853	1.50077	-0.757522	0.485823	0.70445	-7.14263	-0.120466	1.50123	-1.49689	0.199	0.372718	-6.38073	78	106	135	97	106	101	85	94	75	877
2310061I04Rik	ENSMUSG00000050705,15	0.0198837	4.81973	0.235596	0.823959	0.96692	-8.33309	-0.0269952	4.76823	-0.342733	0.746949	0.888675	-7.89829	-0.0503763	4.7986	-1.09881	0.325489	0.515278	-7.48139	883	1062	937	1057	970	903	840	914	814	8380
2410002F23Rik	ENSMUSG00000045411,16	0.0155299	4.68626	0.263183	0.803885	0.96692	-8.30973	-0.0247673	4.63825	-0.265917	0.801843	0.919621	-7.91284	-0.0441921	4.66675	-0.519207	0.627379	0.771786	-7.95529	871	921	833	884	892	886	731	782	837	7637
2410004B18Rik	ENSMUSG00000036873,13	-0.189239	4.09642	-1.50938	0.197103	0.96692	-7.15593	-0.074692	4.12493	-0.553063	0.606097	0.800134	-7.71892	0.111323	4.05087	1.80061	0.136081	0.271243	-6.5299	735	559	590	553	559	535	589	552	479	5151
2410006H16Rik	ENSMUSG00000086841,1	0.0201184	3.59992	0.0980555	0.926052	0.976864	-8.21077	0.178013	3.64842	0.586879	0.584985	0.788101	-7.63845	0.156488	3.67883	0.692546	0.521661	0.686119	-7.68301	546	353	360	414	434	407	409	594	308	3825
2410018L13Rik	ENSMUSG00000073164,11	-0.232236	1.86899	-1.5411	0.189481	0.96692	-6.75488	-0.230388	1.84208	-1.65464	0.164181	0.341892	-6.23447	-0.00201279	1.74654	-0.0140231	0.989393	0.993745	-7.54718	114	147	146	126	126	96	121	98	96	1070
2410131K14Rik	ENSMUSG00000032840,7	0.057272	4.32423	0.734308	0.498759	0.96692	-7.9989	-0.0499536	4.24255	-0.630411	0.5585	0.767507	-7.68067	-0.110926	4.29162	-3.89558	0.0126725	0.201968	-3.9463	736	614	667	747	688	668	610	594	564	5888
2500004C02Rik	ENSMUSG00000073236,4	-0.0937861	2.08983	-0.648552	0.547867	0.96692	-7.71788	0.0264467	2.12055	0.165961	0.875255	0.943668	-7.57497	0.117153	2.09533	1.65003	0.16427	0.317421	-6.33136	136	131	188	145	135	143	143	155	120	1296
2510002D24Rik	ENSMUSG00000071632,10	0.0117913	3.13094	0.0851499	0.935754	0.9827	-8.14301	0.118027	3.15494	0.605442	0.573595	0.779858	-7.55569	0.103273	3.18075	0.721148	0.505446	0.671604	-7.56751	358	267	276	330	288	287	357	303	233	2699
2510009E07Rik	ENSMUSG00000043391,10	0.0449099	7.11965	0.803417	0.46155	0.96692	-8.23983	-0.0291381	7.05409	-0.440196	0.679767	0.846802	-8.05913	-0.0774532	7.09749	-1.30578	0.252521	0.434361	-7.54229	4329	4884	4836	4821	4786	4929	4551	4158	3827	41121
2510039O18Rik	ENSMUSG00000044496,6	0.0627018	5.07731	0.752585	0.488711	0.96692	-8.06991	0.00707282	5.02153	0.0871646	0.934218	0.967231	-7.98951	-0.0593003	5.07322	-1.54093	0.188325	0.355932	-7.00623	1247	1052	1095	1279	1165	1110	1016	1072	1007	10043
2610001J05Rik	ENSMUSG00000052419,7	-0.0529602	5.28596	-0.876729	0.424419	0.96692	-7.98506	0.0399256	5.30363	0.577423	0.590842	0.791326	-7.82546	0.0897329	5.29815	1.49434	0.199635	0.373731	-7.09368	1249	1419	1409	1298	1311	1332	1361	1329	1128	11836
2610002M06Rik	ENSMUSG00000031242,7	0.0751684	6.01696	0.572867	0.593823	0.96692	-8.30198	0.0797185	5.99054	0.679245	0.529746	0.743504	-7.81648	0.0011894	6.0494	0.0189347	0.985679	0.991755	-8.29644	1787	2329	2401	2212	2208	2427	2127	2166	1928	19585
2610005L07Rik	ENSMUSG00000071793,12	-0.102243	1.9775	-0.497776	0.641712	0.96692	-7.79378	-0.0881213	1.95909	-0.315681	0.766104	0.901265	-7.5008	0.0086964	1.92749	0.0427338	0.967688	0.981323	-7.5891	180	132	113	135	136	119	119	96	148	1178
2610008E11Rik	ENSMUSG00000060301,6	-0.00379765	5.3731	-0.0254244	0.980791	0.998181	-8.42687	0.0437039	5.36833	0.311457	0.769113	0.903182	-7.96897	0.043935	5.3878	0.778015	0.474284	0.64434	-7.8669	1139	1515	1647	1384	1385	1493	1319	1378	1291	12551
2610021A01Rik	ENSMUSG00000091474,2	0.134595	4.1613	0.633667	0.556715	0.96692	-8.05509	0.098762	4.11449	0.474657	0.656773	0.833996	-7.76427	-0.039175	4.20362	-0.503554	0.637523	0.780166	-7.89598	430	620	741	617	629	685	613	574	520	5429
2610035D17Rik	ENSMUSG00000087259,7	0.00589654	2.94882	0.0331507	0.974956	0.998181	-8.11748	-0.0703416	2.88301	-0.956053	0.386698	0.642686	-7.21967	-0.0802464	2.90693	-0.426045	0.689081	0.816614	-7.7016	248	261	280	275	208	325	214	232	238	2281
2610044O15Rik8	ENSMUSG00000071302,10	-0.0621334	4.00744	-0.519635	0.627544	0.96692	-8.11075	0.0600021	4.03923	1.10446	0.32396	0.564877	-7.23151	0.119213	4.02971	1.06402	0.339453	0.531772	-7.40401	522	594	568	479	559	587	555	554	488	4906
2610301B20Rik	ENSMUSG00000059482,15	0.0387112	4.29561	0.371805	0.726688	0.96692	-8.223	0.047059	4.2711	0.646294	0.549036	0.760062	-7.67276	0.00501843	4.31174	0.066605	0.949666	0.969612	-8.05978	592	719	679	639	724	687	629	636	600	5905
2610306M01Rik	ENSMUSG00000100164,1	-0.362232	1.58848	-1.89233	0.12261	0.96692	-6.25206	-0.31536	1.58298	-1.48	0.204082	0.413696	-6.39936	0.0439921	1.42133	0.386397	0.716255	0.835949	-7.38029	149	99	106	100	83	89	81	102	73	882
2610307P16Rik	ENSMUSG00000085936,7	0.140763	2.12056	1.16881	0.299945	0.96692	-7.24111	0.0977912	2.07082	0.999126	0.367509	0.621839	-7.03386	-0.0466635	2.16166	-0.592537	0.581137	0.738542	-7.43926	157	124	144	164	168	138	143	140	129	1307
2610316D01Rik	ENSMUSG00000097040,6	-0.0944534	2.09011	-0.538591	0.615408	0.96692	-7.79167	-0.0757772	2.07161	-0.434326	0.683725	0.848305	-7.46982	0.0151182	2.04493	0.545046	0.609817	0.75874	-7.44421	120	188	149	151	138	134	132	132	124	1268
2610507B11Rik	ENSMUSG00000010277,7	0.105668	7.65312	4.20714	0.0102541	0.96692	-4.25377	0.0171	7.58079	0.759473	0.483788	0.702583	-7.88766	-0.092224	7.65419	-2.7713	0.0425701	0.201968	-5.73699	6509	6604	6777	7685	7037	6788	6005	6345	5965	59715
2610507I01Rik	ENSMUSG00000085882,1	-0.140569	2.49734	-1.0323	0.353558	0.96692	-7.45666	-0.173344	2.45419	-1.52733	0.1924	0.392668	-6.50627	-0.0373143	2.40363	-0.271506	0.797646	0.895304	-7.65543	222	199	187	203	200	153	168	151	171	1654
2700049A03Rik	ENSMUSG00000034601,17	0.0562589	4.06574	0.933496	0.397322	0.96692	-7.79199	0.0424645	4.02997	0.487199	0.64851	0.828604	-7.74738	-0.016786	4.07902	-0.254602	0.809909	0.903314	-7.98735	510	592	583	595	572	589	519	596	467	5023
2700062C07Rik	ENSMUSG00000024273,8	0.00324535	3.41971	0.053429	0.959651	0.99777	-8.18926	-0.0689233	3.35502	-2.10731	0.0920526	0.205478	-5.90682	-0.0754635	3.37749	-1.38734	0.228178	0.402938	-6.92735	371	366	357	365	349	388	318	332	299	3145
2700081O15Rik	ENSMUSG00000053080,10	-0.0458617	5.96163	-0.877787	0.423901	0.96692	-8.05553	-0.0470679	5.93272	-1.12143	0.317383	0.556943	-7.40261	-0.00485966	5.93078	-0.0960418	0.92749	0.954814	-8.27619	2032	2198	2263	2085	2053	2175	1936	1898	1879	18519
2700097O09Rik	ENSMUSG00000062198,5	-0.0911247	2.15619	-0.3771	0.72301	0.96692	-7.89048	0.0303978	2.18816	0.121589	0.908372	0.955006	-7.59532	0.118412	2.16408	1.48977	0.20078	0.375445	-6.54619	109	176	200	161	139	144	144	167	128	1368
2700099C18Rik	ENSMUSG00000098090,8	-0.175752	1.94125	-0.968388	0.381377	0.96692	-7.41401	0.125409	2.06477	1.0793	0.333937	0.577789	-6.95089	0.297083	1.99607	2.15537	0.0878398	0.201968	-5.65622	162	123	135	146	131	98	141	141	132	1209
2810001G20Rik	ENSMUSG00000087497,7	-0.037852	2.1515	-0.766226	0.481204	0.96692	-7.63882	0.0129779	2.147	0.0941167	0.92899	0.964095	-7.59119	0.048141	2.14892	0.351647	0.74048	0.854454	-7.56788	158	147	155	152	143	155	169	146	112	1337
2810002D19Rik	ENSMUSG00000045464,5	0.0400124	2.71987	0.214825	0.839179	0.96692	-8.05155	0.189476	2.76487	0.941666	0.393289	0.650078	-7.21431	0.146855	2.80676	1.24221	0.273162	0.452405	-6.98109	177	214	286	230	248	210	236	268	191	2060
2810004N23Rik	ENSMUSG00000031984,8	-0.0957605	4.79277	-0.929705	0.399087	0.96692	-7.88137	-0.0721011	4.77631	-0.615591	0.567428	0.775046	-7.74811	0.0202912	4.7486	0.264569	0.80267	0.89806	-8.08388	1110	915	923	1011	887	865	943	860	747	8261
2810006K23Rik	ENSMUSG00000047635,6	-0.061203	3.22857	-0.560371	0.601637	0.96692	-7.97754	0.0609398	3.26152	0.586441	0.585256	0.788359	-7.58454	0.118513	3.251	2.35939	0.0687003	0.201968	-5.6617	370	290	325	349	300	296	318	328	285	2861
2810013P06Rik	ENSMUSG00000099881,1	0.127213	3.427	0.956708	0.386655	0.96692	-7.68379	0.159824	3.41365	0.969305	0.380708	0.637129	-7.28875	0.0302507	3.49872	0.26984	0.798851	0.896027	-7.88363	287	383	393	377	381	398	362	422	296	3299
2810021J22Rik	ENSMUSG00000020491,15	0.0552459	3.07978	0.700508	0.517731	0.96692	-7.85554	-0.0229016	3.01168	-0.302041	0.775838	0.906701	-7.69247	-0.0812608	3.06071	-1.38835	0.227892	0.402938	-6.86364	257	280	314	289	306	291	268	264	229	2498
2810025M15Rik	ENSMUSG00000049881,13	0.103907	3.52856	2.00527	0.10676	0.96692	-6.4508	0.118915	3.50782	2.23301	0.0807411	0.182215	-5.77105	0.0113683	3.58044	0.717691	0.505991	0.672099	-7.64752	398	352	391	427	407	396	384	384	358	3497
2810032G03Rik	ENSMUSG00000037735,7	-0.0864158	3.15687	-1.22857	0.278859	0.96692	-7.35725	0.0174288	3.18062	0.28671	0.786835	0.912238	-7.72429	0.100161	3.15851	1.78115	0.139426	0.276046	-6.39561	286	328	328	295	311	284	291	288	287	2698
2810402E24Rik	ENSMUSG00000099966,1	-0.0636534	1.55205	-0.712499	0.510943	0.96692	-7.56119	-0.088834	1.5102	-0.722905	0.504914	0.722043	-7.17274	-0.0280196	1.49948	-0.295514	0.780345	0.88381	-7.43548	89	108	110	101	101	92	83	103	77	864
2810429I04Rik	ENSMUSG00000097709,8	0.254934	2.53092	3.50436	0.0200247	0.96692	-4.42116	-0.183693	2.28329	-2.22722	0.0813033	0.183379	-5.58011	-0.442303	2.43173	-4.6583	0.0066544	0.201968	-2.82843	174	190	177	212	231	206	160	135	139	1624
2810468N07Rik	ENSMUSG00000091475,3	0.0709743	1.44749	0.366217	0.730578	0.96692	-7.75176	0.160107	1.46169	0.910375	0.407942	0.663721	-7.00174	0.0861533	1.5203	0.592296	0.581286	0.738664	-7.28853	83	77	115	84	107	97	85	107	85	840
2900026A02Rik	ENSMUSG00000051339,10	0.0738625	4.99274	0.887283	0.419272	0.96692	-7.94338	-0.0109823	4.92262	-0.103521	0.921924	0.960415	-7.97786	-0.0886418	4.97997	-0.841399	0.441255	0.631883	-7.75777	963	1124	1100	1257	1099	1016	851	1060	972	9442
2900041M22Rik	ENSMUSG00000054418,6	-0.186623	1.58942	-4.09273	0.011045	0.96692	-3.56879	-0.103603	1.60188	-0.987623	0.372555	0.627334	-6.95451	0.0800339	1.52949	0.831892	0.446094	0.633582	-7.1049	103	107	118	101	92	96	86	110	83	896
2900052N01Rik	ENSMUSG00000099696,6	0.161933	4.56083	1.21408	0.283844	0.96692	-7.55896	0.0475101	4.47431	0.41496	0.696868	0.856094	-7.83546	-0.117148	4.57645	-0.895722	0.414385	0.611703	-7.65196	692	852	749	802	803	974	792	760	608	7032
2900079G21Rik	ENSMUSG00000087038,9	-0.26867	1.2858	-1.39934	0.225945	0.96692	-6.80576	-0.128173	1.32694	-0.674577	0.53245	0.745949	-7.17279	0.13774	1.21251	2.52707	0.0553077	0.201968	-4.983	100	106	71	75	74	78	78	81	68	731
2900097C17Rik	ENSMUSG00000102869,2	0.103773	6.67659	0.904932	0.410777	0.96692	-8.10391	0.027849	6.61051	0.222744	0.833314	0.933868	-8.1076	-0.0798532	6.68349	-1.1075	0.322079	0.511368	-7.71356	2824	3644	3718	3653	3520	3743	3250	2959	3180	30491
3110040N11Rik	ENSMUSG00000025102,14	-0.0789723	2.68097	-0.612716	0.569328	0.96692	-7.85305	0.0630632	2.72261	0.488926	0.647377	0.827766	-7.5581	0.139203	2.70368	1.80731	0.134948	0.269286	-6.26741	260	217	201	208	226	207	225	230	187	1961
3110053B16Rik	ENSMUSG00000085642,8	0.177911	1.73105	2.67717	0.0483353	0.96692	-5.27097	-0.0438837	1.59304	-0.377943	0.722333	0.871707	-7.40447	-0.226266	1.70259	-2.24943	0.0783797	0.201968	-5.46374	114	98	107	125	115	122	99	84	99	963
3110082I17Rik	ENSMUSG00000053553,11	-0.117429	2.08412	-0.389889	0.714162	0.96692	-7.87062	-0.0852124	2.07389	-0.282323	0.789993	0.913869	-7.53451	0.0276645	2.03375	0.215849	0.838256	0.916155	-7.58701	226	118	128	164	122	134	117	133	138	1280
3830406C13Rik	ENSMUSG00000033111,16	0.151733	4.53187	1.17247	0.298615	0.96692	-7.60173	0.0734098	4.46399	0.547896	0.609363	0.80252	-7.76035	-0.0814461	4.56083	-1.47739	0.203914	0.380087	-7.01308	630	878	760	835	822	851	770	745	642	6933
3830408C21Rik	ENSMUSG00000071181,2	0.0310666	1.84497	0.146569	0.889731	0.96692	-7.90128	-0.0692993	1.76477	-0.285809	0.787483	0.912459	-7.47415	-0.102319	1.80047	-0.719298	0.506484	0.672565	-7.26224	105	162	104	128	133	112	113	123	82	1062
4632404H12Rik	ENSMUSG00000042579,2	-0.189211	2.6581	-3.39442	0.0223704	0.96692	-4.57156	-0.188971	2.62954	-2.55452	0.0552985	0.129487	-5.21908	-0.00285739	2.55522	-0.0388991	0.970586	0.98304	-7.73303	218	241	231	222	189	197	191	202	159	1850
4632415L05Rik	ENSMUSG00000048106,6	0.00652137	4.30193	0.0590957	0.955378	0.99506	-8.30462	-0.0703768	4.23472	-0.712588	0.510706	0.727394	-7.61864	-0.0800414	4.25902	-1.0532	0.3439	0.537034	-7.45043	583	734	708	681	627	729	614	614	522	5812
4732491K20Rik	ENSMUSG00000097350,2	-0.209048	2.20924	-0.915331	0.405836	0.96692	-7.51713	0.0171281	2.29516	0.0830683	0.937301	0.969102	-7.61961	0.222296	2.2092	2.14334	0.0891358	0.201968	-5.72095	220	163	136	171	148	125	165	155	148	1431
4833420G17Rik	ENSMUSG00000062822,8	0.11044	4.50491	0.655101	0.544004	0.96692	-8.0808	0.222757	4.53304	1.32574	0.247138	0.46747	-7.03973	0.108612	4.60923	3.0589	0.0309554	0.201968	-4.9968	578	884	812	842	817	769	793	800	784	7079
4833439L19Rik	ENSMUSG00000025871,18	0.125282	6.90207	1.89436	0.122304	0.96692	-6.97268	0.00716962	6.81453	0.126164	0.904946	0.953511	-8.14513	-0.121542	6.89812	-2.94838	0.0349322	0.201968	-5.42544	3582	4152	4022	4247	4220	4388	3720	3652	3364	35347
4921507P07Rik	ENSMUSG00000029828,4	0.15863	1.71381	1.58992	0.178323	0.96692	-6.66334	-0.0970543	1.55836	-0.888843	0.418279	0.673582	-7.04023	-0.259323	1.65806	-2.91394	0.0362879	0.201968	-4.60417	95	118	105	128	107	121	82	98	90	944
4921524J17Rik	ENSMUSG00000036934,9	0.000559308	3.97721	0.00420499	0.996823	0.998181	-8.26683	0.0294293	3.96231	0.190624	0.856971	0.934026	-7.85798	0.0261725	3.98384	0.195406	0.853328	0.916155	-7.98826	455	554	615	545	488	592	569	537	405	4760
4930402H24Rik	ENSMUSG00000027309,18	0.0278124	6.02703	0.250288	0.813248	0.96692	-8.45826	0.0426392	6.00624	0.379949	0.720942	0.87073	-7.99886	0.01103	6.04126	0.184595	0.861329	0.92025	-8.27505	1864	2392	2405	2243	2206	2328	2099	2020	2084	19641
4930430F08Rik	ENSMUSG00000046567,10	-0.0233576	3.9775	-0.117932	0.911139	0.968062	-8.25839	0.114268	4.01725	0.648937	0.547471	0.758559	-7.64169	0.134449	4.02741	0.986718	0.372328	0.570311	-7.48206	421	596	633	493	505	618	603	517	487	4873
4930447C04Rik	ENSMUSG00000021098,14	-0.182561	3.39633	-0.806334	0.460027	0.96692	-7.81716	-0.112355	3.4017	-0.458757	0.66733	0.839667	-7.68086	0.0675941	3.33238	0.471155	0.658811	0.795724	-7.76483	276	450	450	317	364	337	387	323	266	3170
4930451G09Rik	ENSMUSG00000022543,9	-0.0754653	2.11246	-0.664002	0.538783	0.96692	-7.71107	-0.0624785	2.09033	-0.392917	0.711979	0.865514	-7.49345	0.00965177	2.07254	0.0854644	0.935451	0.959946	-7.61962	159	166	131	151	142	139	158	125	115	1286
4930452B06Rik	ENSMUSG00000021747,12	0.0483381	3.92387	0.532078	0.619562	0.96692	-8.09258	0.0424094	3.89212	0.413508	0.697859	0.856836	-7.76929	-0.0090446	3.93687	-0.124148	0.906387	0.942212	-7.99423	550	518	464	527	513	547	528	484	424	4555
4930453N24Rik	ENSMUSG00000059920,9	0.0626264	4.40919	0.408541	0.701352	0.96692	-8.2197	0.0826481	4.39065	0.570825	0.59495	0.793497	-7.7377	0.0166414	4.44324	0.265014	0.802347	0.89793	-8.03989	567	768	820	751	693	793	677	734	643	6446
4930466K18Rik	ENSMUSG00000112332,1	0.0947522	1.66307	0.867145	0.429136	0.96692	-7.4535	0.0288527	1.60084	0.258331	0.807343	0.922561	-7.4514	-0.0691651	1.66954	-0.489908	0.646442	0.78664	-7.38677	96	106	111	112	99	126	114	94	84	942
4930503L19Rik	ENSMUSG00000044906,6	-0.0298962	3.86853	-0.133277	0.899655	0.96692	-8.24194	-0.102655	3.80428	-0.489892	0.646744	0.827372	-7.71775	-0.0767272	3.81052	-0.657193	0.542197	0.704777	-7.7315	370	602	573	517	427	551	448	406	428	4322
4930523C07Rik	ENSMUSG00000090394,8	0.149542	1.79337	0.746478	0.492052	0.96692	-7.58365	0.0946386	1.74032	0.634151	0.556262	0.765711	-7.28512	-0.0593537	1.83407	-0.281485	0.790437	0.890655	-7.52023	97	124	117	164	99	119	93	121	115	1049
4930563E22Rik	ENSMUSG00000053574,4	-0.260953	2.19384	-2.12703	0.0920848	0.96692	-6.06941	-0.145221	2.22161	-0.683985	0.527009	0.741518	-7.33888	0.113098	2.11214	0.565211	0.598117	0.750496	-7.44619	168	193	153	135	146	148	188	130	112	1373
4930579G24Rik	ENSMUSG00000027811,9	-0.183638	1.23049	-0.604572	0.57428	0.96692	-7.57167	-0.0892909	1.25113	-0.253999	0.81049	0.924327	-7.38215	0.0898729	1.18148	0.449149	0.673488	0.805857	-7.29139	55	94	118	80	79	67	56	81	85	715
4931406C07Rik	ENSMUSG00000031938,15	0.0865472	4.55087	0.854909	0.435218	0.96692	-7.92299	0.0414336	4.50037	0.390042	0.713962	0.866326	-7.85002	-0.0487085	4.56412	-0.68993	0.523162	0.687588	-7.82458	718	883	739	883	762	843	679	781	725	7013
4931406P16Rik	ENSMUSG00000066571,13	0.131717	5.83632	1.45784	0.210134	0.96692	-7.41319	0.0706478	5.77771	0.733148	0.49921	0.716781	-7.75572	-0.0647447	5.86437	-1.13552	0.311305	0.498411	-7.5824	1622	1975	2022	2180	1917	2064	1686	1903	1762	17131
4931414P19Rik	ENSMUSG00000022179,5	0.111181	1.91086	1.28	0.261807	0.96692	-7.07529	0.182206	1.919	1.25987	0.268042	0.488575	-6.72604	0.0669951	1.99566	0.567131	0.596914	0.749547	-7.41791	107	130	134	139	135	127	109	138	137	1156
4931428F04Rik	ENSMUSG00000014837,15	0.0403071	6.59114	0.34927	0.742435	0.96692	-8.48084	-0.0442614	6.52094	-0.337068	0.750943	0.891118	-8.06167	-0.0884731	6.56163	-0.90405	0.410383	0.607302	-7.90254	3715	3086	2988	3372	3555	3143	3025	2629	2959	28472
4932438A13Rik	ENSMUSG00000037270,18	0.023815	7.20483	0.183411	0.862351	0.96692	-8.59586	0.110328	7.21884	0.984804	0.373799	0.629049	-7.65279	0.0836315	7.25195	0.505975	0.635948	0.778761	-8.29144	5118	4845	5029	4627	5996	4790	5753	5005	4092	45255
4933404O12Rik	ENSMUSG00000097908,7	0.155354	2.83175	0.955255	0.387316	0.96692	-7.59172	0.0645996	2.75928	0.308978	0.770881	0.904181	-7.64856	-0.0950072	2.85808	-0.678953	0.529493	0.693134	-7.53262	186	226	289	286	243	245	182	244	237	2138
4933421O10Rik	ENSMUSG00000085037,1	-0.205836	2.02396	-1.53041	0.192016	0.96692	-6.79898	-0.0925799	2.04934	-0.867754	0.428604	0.682882	-7.15434	0.111241	1.96875	0.672336	0.533335	0.696592	-7.33873	140	153	153	112	132	147	133	146	104	1220
4933431E20Rik	ENSMUSG00000086968,8	0.0483903	5.74539	0.644857	0.550055	0.96692	-8.22423	-0.0380996	5.67397	-0.48182	0.652047	0.831038	-7.9177	-0.0902826	5.71919	-1.19861	0.288208	0.470251	-7.49483	1649	1925	1841	1822	1941	1852	1634	1529	1629	15822
4933434E20Rik	ENSMUSG00000027942,16	0.0564775	5.08318	0.802924	0.461808	0.96692	-8.02844	0.032429	5.04285	0.402258	0.705556	0.861352	-7.89949	-0.0275287	5.09196	-0.582048	0.587619	0.743104	-7.97457	1013	1181	1222	1228	1198	1132	1010	1151	1013	10148
4933439C10Rik	ENSMUSG00000072893,12	-0.151608	1.91882	-1.43875	0.215172	0.96692	-6.88996	-0.1214	1.90541	-0.909168	0.408516	0.664439	-7.08875	0.0272622	1.84966	0.301376	0.776142	0.881253	-7.51735	130	155	124	131	122	115	105	133	104	1119
5031425E22Rik	ENSMUSG00000073147,3	-0.254954	2.2404	-2.25519	0.0789551	0.96692	-5.91202	-0.121551	2.27716	-1.32465	0.24747	0.467939	-6.71758	0.130628	2.17188	1.24373	0.272653	0.451737	-6.83813	161	170	198	135	157	153	144	165	133	1416
5031434O11Rik	ENSMUSG00000097885,7	0.078199	1.49919	0.553811	0.605765	0.96692	-7.66244	-0.177571	1.34524	-2.26077	0.0781015	0.176761	-5.35866	-0.260063	1.40341	-1.70703	0.152958	0.298587	-6.09388	91	99	91	121	99	81	70	78	78	808
5031439G07Rik	ENSMUSG00000036046,14	0.0497837	7.04602	1.29588	0.256744	0.96692	-7.72899	-0.0130266	6.98646	-0.268054	0.800296	0.918644	-8.12568	-0.0665572	7.03219	-1.21495	0.282481	0.462976	-7.63812	4351	4549	4411	4594	4593	4647	3976	3958	4068	39147
5033430I15Rik	ENSMUSG00000038152,4	-0.143058	1.92163	-0.998428	0.36808	0.96692	-7.38059	-0.228208	1.85263	-1.8549	0.128037	0.275432	-5.98179	-0.0897874	1.80169	-0.555278	0.604364	0.754887	-7.37903	120	143	145	133	139	101	99	101	117	1098
5330417C22Rik	ENSMUSG00000040412,16	-0.0312403	3.38807	-0.33836	0.750113	0.96692	-8.11746	-0.114858	3.31702	-1.27541	0.262965	0.48117	-6.9474	-0.0866659	3.3228	-0.69798	0.518553	0.683326	-7.61258	348	373	362	328	353	386	350	292	272	3064
5330434G04Rik	ENSMUSG00000087620,7	0.0418181	5.0729	0.404366	0.70421	0.96692	-8.29686	-0.0574953	4.99456	-0.458177	0.667716	0.839989	-7.86654	-0.102673	5.03662	-1.02698	0.354882	0.550486	-7.58842	979	1232	1204	1144	1150	1221	1143	949	894	9916
5430405H02Rik	ENSMUSG00000085741,8	0.0861469	1.76246	0.946734	0.391209	0.96692	-7.39947	-0.159067	1.61127	-1.82694	0.132544	0.28314	-5.97167	-0.248679	1.67475	-3.60828	0.0174764	0.201968	-3.77966	121	101	115	127	124	108	97	95	82	970
5430416N02Rik	ENSMUSG00000097772,7	0.0193229	1.61771	0.425308	0.689639	0.96692	-7.76019	-0.0054637	1.57567	-0.0292502	0.977895	0.990424	-7.48604	-0.027659	1.60567	-0.146305	0.889813	0.936422	-7.50053	103	103	105	114	97	106	124	92	72	916
5530601H04Rik	ENSMUSG00000087174,7	0.341243	3.66379	2.24848	0.0795901	0.96692	-6.15259	0.230101	3.5796	1.61621	0.17223	0.356832	-6.57451	-0.114642	3.77211	-1.38964	0.227527	0.402938	-6.99547	319	378	469	459	508	502	392	430	409	3866
5730409E04Rik	ENSMUSG00000073755,4	0.0411053	6.20897	0.51573	0.630062	0.96692	-8.35747	-0.0392224	6.14048	-0.383566	0.718436	0.868807	-8.00898	-0.083924	6.18175	-0.952843	0.387556	0.585379	-7.80945	2714	2349	2424	2568	2686	2470	2476	2071	2090	21848
5730455P16Rik	ENSMUSG00000057181,15	0.0708016	6.36621	0.637358	0.554512	0.96692	-8.29401	0.0458264	6.32495	0.543799	0.611961	0.804218	-7.93883	-0.0283278	6.38167	-0.381085	0.719934	0.838505	-8.25094	2394	2909	2980	2723	2915	3074	2659	2668	2423	24745
5730480H06Rik	ENSMUSG00000029089,8	-0.0325219	3.0467	-0.314114	0.767295	0.96692	-8.07476	-0.00496999	3.03298	-0.0388579	0.970638	0.986679	-7.74995	0.0232932	3.03789	0.29739	0.778999	0.883019	-7.78429	268	256	337	292	268	280	242	260	275	2478
5830417I10Rik	ENSMUSG00000078684,8	0.0826262	2.35267	0.60523	0.57388	0.96692	-7.79858	-0.0921693	2.23843	-0.658907	0.541597	0.753542	-7.36094	-0.178851	2.29888	-1.35448	0.237706	0.414662	-6.73781	193	161	156	214	164	165	127	161	147	1488
5930420M18Rik	ENSMUSG00000107201,1	0.330991	1.48959	2.70074	0.0470652	0.96692	-5.19068	0.123531	1.35719	0.66752	0.536556	0.749312	-7.18504	-0.210902	1.54252	-1.16678	0.29966	0.484972	-6.7738	94	84	78	115	116	93	109	77	71	837
6030458C11Rik	ENSMUSG00000022195,7	0.0645115	4.93161	0.450288	0.673101	0.96692	-8.25828	0.101784	4.92192	0.69196	0.522428	0.737823	-7.70739	0.0335555	4.97548	0.415519	0.696245	0.821396	-8.05451	824	1143	1122	1036	1077	1099	1065	939	985	9290
6330403K07Rik	ENSMUSG00000018451,7	0.000229045	7.7942	0.00360783	0.997274	0.99837	-8.6749	0.0182096	7.7745	0.341419	0.747875	0.889259	-8.16235	0.0146505	7.79564	0.185388	0.860741	0.91987	-8.4853	7405	7730	7608	7255	7717	7887	7638	6948	6412	66600
6330403L08Rik	ENSMUSG00000075585,3	0.0271168	5.16658	0.502396	0.638702	0.96692	-8.25525	0.0239689	5.13698	0.278284	0.792904	0.915519	-7.95865	-0.00707294	5.17146	-0.0916989	0.930757	0.956864	-8.17865	1115	1263	1273	1257	1256	1217	1198	1044	1136	10759
6330409D20Rik	ENSMUSG00000009551,2	0.225408	1.33429	1.64044	0.167468	0.96692	-6.52085	0.0930294	1.23955	0.590044	0.583033	0.786468	-7.2156	-0.136208	1.37298	-0.98965	0.371034	0.568925	-6.91845	91	69	79	93	103	84	91	70	71	751
6330418K02Rik	ENSMUSG00000085227,1	-0.0477857	1.30853	-0.170555	0.871882	0.96692	-7.78512	-0.0505739	1.27864	-0.179099	0.865503	0.939186	-7.40734	-0.00578563	1.27323	-0.0587361	0.955603	0.973533	-7.431	125	75	67	93	84	73	77	84	65	743
6430548M08Rik	ENSMUSG00000031824,15	-0.0337576	5.77093	-0.38171	0.719814	0.96692	-8.38204	-0.0951274	5.71246	-0.861252	0.431828	0.686449	-7.64063	-0.0653741	5.71609	-0.967165	0.381056	0.578475	-7.73707	2115	1722	1845	1940	1808	1806	1627	1528	1671	16062
6430553K19Rik	ENSMUSG00000116755,1	0.186784	1.00812	0.543403	0.61235	0.96692	-7.56342	-0.183465	0.793747	-0.50736	0.635351	0.819223	-7.17446	-0.374064	0.909976	-0.972171	0.378805	0.576163	-6.82029	50	88	59	58	104	65	74	36	50	584
6430571L13Rik	ENSMUSG00000037977,6	0.063177	1.9693	0.453583	0.670897	0.96692	-7.81667	-0.000157163	1.9118	-0.00093311	0.999295	0.999637	-7.55207	-0.0681338	1.96251	-0.498847	0.640591	0.782569	-7.45106	150	130	114	157	131	124	108	115	135	1164
6530402F18Rik	ENSMUSG00000079499,9	0.108206	2.84209	1.32122	0.248853	0.96692	-7.2002	0.0576609	2.78976	0.405859	0.703088	0.860034	-7.61279	-0.0551335	2.86492	-0.449273	0.673405	0.805792	-7.68105	207	252	250	261	245	259	234	195	244	2147
6720468P15Rik	ENSMUSG00000117655,1	0.125464	1.76104	0.677427	0.530974	0.96692	-7.63098	0.177807	1.75878	1.04963	0.346041	0.594014	-6.92332	0.048747	1.84333	0.488142	0.647601	0.787565	-7.42961	87	134	115	114	134	116	117	110	114	1041
6720489N17Rik	ENSMUSG00000072066,7	-0.0981575	2.82913	-1.80912	0.135862	0.96692	-6.59599	0.0109742	2.85392	0.0992784	0.92511	0.962278	-7.71587	0.106673	2.82566	0.922981	0.4014	0.598109	-7.31872	250	255	247	237	222	247	254	255	186	2153
6820431F20Rik	ENSMUSG00000071796,13	0.175284	2.2397	1.83096	0.132245	0.96692	-6.46173	0.123453	2.186	0.60355	0.574749	0.78072	-7.3911	-0.055974	2.29458	-0.3042	0.774121	0.879989	-7.61935	137	172	147	171	173	171	190	121	147	1429
8030462N17Rik	ENSMUSG00000047466,10	0.0378302	3.6513	0.231967	0.826612	0.96692	-8.19113	0.0446483	3.62628	0.288359	0.78565	0.911486	-7.78728	0.00340148	3.66635	0.0540185	0.959165	0.975692	-7.95583	333	461	493	460	395	457	401	424	368	3792
8430422H06Rik	ENSMUSG00000117633,1	0.15552	2.62674	0.432365	0.685157	0.96692	-7.95135	0.0397346	2.54049	0.107415	0.919	0.958874	-7.66091	-0.119278	2.63997	-0.835519	0.444243	0.631883	-7.35748	118	284	236	230	248	195	222	173	169	1875
8430429K09Rik	ENSMUSG00000034587,8	-0.0426969	3.08198	-0.226089	0.830915	0.96692	-8.10883	-0.0877971	3.03113	-0.496904	0.642156	0.824072	-7.60402	-0.0486346	3.02968	-0.605124	0.573419	0.731936	-7.62162	373	260	260	303	306	251	261	260	232	2506
9130019O22Rik	ENSMUSG00000030823,6	-0.0745987	2.0776	-1.08184	0.333201	0.96692	-7.32622	-0.153705	2.01139	-1.60435	0.174794	0.361389	-6.33007	-0.0836447	1.9946	-0.769642	0.478781	0.646153	-7.26749	138	150	155	152	145	126	114	117	132	1229
9130023H24Rik	ENSMUSG00000062944,4	-0.0426403	2.2653	-0.318132	0.764436	0.96692	-7.9357	-0.139525	2.18927	-1.04683	0.347202	0.595632	-7.00677	-0.100885	2.18893	-1.41465	0.220538	0.397096	-6.64184	137	187	179	171	148	168	141	133	138	1402
9130221H12Rik	ENSMUSG00000090330,2	-0.175587	1.90661	-1.6689	0.16165	0.96692	-6.60319	-0.27975	1.82644	-2.40125	0.066115	0.151593	-5.26975	-0.107778	1.75836	-0.796738	0.464339	0.64434	-7.18893	139	124	145	143	110	111	119	102	86	1079
9130401M01Rik	ENSMUSG00000101892,1	0.000236133	3.55916	0.00434774	0.996715	0.998181	-8.211	0.108423	3.58491	1.3965	0.226399	0.442496	-6.84416	0.104533	3.60584	1.34103	0.241713	0.42054	-7.02475	420	387	400	405	390	417	436	374	376	3605
9230112E08Rik	ENSMUSG00000070461,3	-0.186697	2.04059	-1.44049	0.214707	0.96692	-6.91188	-0.0686279	2.07219	-0.627159	0.560452	0.768961	-7.35303	0.114279	1.99807	1.59991	0.174914	0.334492	-6.37187	171	145	135	152	124	121	131	135	123	1237
9230114K14Rik	ENSMUSG00000097145,5	-0.118289	2.45576	-0.789071	0.469098	0.96692	-7.67681	-0.237609	2.36785	-1.55459	0.185977	0.381496	-6.45678	-0.123049	2.33021	-3.42307	0.0199007	0.201968	-4.10982	157	199	236	187	183	171	157	151	143	1584
9330102E08Rik	ENSMUSG00000107879,1	0.229598	2.19328	2.94253	0.0359984	0.96692	-5.02974	0.101037	2.10014	0.995298	0.369182	0.623607	-7.04315	-0.131656	2.23504	-1.3977	0.225252	0.402938	-6.6724	151	146	135	180	175	154	158	145	120	1364
9330151L19Rik	ENSMUSG00000097061,2	-0.0389672	2.44479	-0.363352	0.732577	0.96692	-7.95106	0.0662566	2.46907	0.550201	0.607904	0.801451	-7.47713	0.10185	2.47054	1.63365	0.167674	0.32294	-6.43712	159	198	211	197	175	180	170	201	168	1659
9330158H04Rik	ENSMUSG00000073154,10	0.176839	1.26242	0.709922	0.512396	0.96692	-7.50151	-0.272417	1.00808	-3.12428	0.0293845	0.129487	-4.20765	-0.452403	1.1185	-1.73532	0.147641	0.289696	-5.98654	71	83	76	79	69	121	64	56	53	672
9330159F19Rik	ENSMUSG00000004360,9	0.107641	6.46781	0.44489	0.67672	0.96692	-8.4235	-0.0288911	6.3709	-0.126411	0.904761	0.953511	-8.10742	-0.140395	6.44658	-0.916521	0.404447	0.600948	-7.87665	2104	3322	3526	2824	3061	3627	2854	2348	2615	26281
9330162G02Rik	ENSMUSG00000109536,1	-0.593733	1.16794	-4.5883	0.00740224	0.96692	-2.9935	-0.0536603	1.40903	-0.622111	0.563489	0.77155	-7.22764	0.536841	1.13302	4.41617	0.00820061	0.201968	-2.78676	88	103	91	62	72	54	90	83	74	717
9330182L06Rik	ENSMUSG00000056004,16	0.115462	7.28725	0.773253	0.477529	0.96692	-8.28209	0.0199822	7.21121	0.113314	0.914574	0.957136	-8.17971	-0.0993461	7.29015	-0.795989	0.464734	0.64434	-8.08638	4158	5938	5450	5348	5800	5594	5400	4174	4693	46555
9430015G10Rik	ENSMUSG00000059939,13	-0.121839	3.22964	-2.08662	0.0966993	0.96692	-6.30133	-0.0589635	3.23428	-0.520382	0.626933	0.812712	-7.62184	0.0583689	3.19345	0.498503	0.640816	0.782696	-7.72215	341	338	323	342	293	291	260	296	323	2807
9430021M05Rik	ENSMUSG00000054457,5	0.432622	1.66644	2.36589	0.0692479	0.96692	-5.65387	0.0924664	1.46789	0.506011	0.636226	0.819846	-7.3141	-0.343253	1.70415	-6.66982	0.0014303	0.201968	-0.905184	98	112	73	125	121	132	91	93	86	931
9430038I01Rik	ENSMUSG00000040139,14	-0.24329	1.45786	-1.47414	0.205924	0.96692	-6.75232	-0.238383	1.42919	-1.68411	0.158266	0.330766	-6.11676	0.00288094	1.32919	0.0181156	0.986298	0.992022	-7.44653	102	114	90	75	98	87	81	90	65	802
9530036M11Rik	ENSMUSG00000087670,1	0.114494	1.20548	0.507517	0.635376	0.96692	-7.62804	-0.477824	0.881648	-10.3142	0.000191712	0.129487	1.49434	-0.59621	0.959522	-2.4783	0.0596824	0.201968	-4.98557	71	74	81	90	59	103	49	50	48	625
9530068E07Rik	ENSMUSG00000036275,13	0.0470297	6.75122	0.426472	0.689145	0.96692	-8.46181	0.0937366	6.74606	0.751976	0.488846	0.706894	-7.82464	0.0433493	6.79057	0.777895	0.474348	0.64434	-8.04223	3060	3704	4183	3937	3634	3703	3416	3954	3211	32802
9530077C05Rik	ENSMUSG00000036411,10	0.124738	2.59127	0.863587	0.430897	0.96692	-7.6361	0.185341	2.59204	1.31775	0.24959	0.471177	-6.7825	0.0577714	2.67638	0.743541	0.493003	0.659839	-7.44415	160	207	229	206	215	226	208	223	181	1855
9630013A20Rik	ENSMUSG00000115529,1	0.0445567	2.52172	0.215067	0.839001	0.96692	-8.01638	-0.120484	2.4109	-0.735538	0.497885	0.715657	-7.33348	-0.168911	2.45532	-1.108	0.321884	0.511101	-7.05	153	200	233	193	172	240	164	156	164	1675
9630028B13Rik	ENSMUSG00000051295,7	-0.33565	1.16903	-0.488487	0.647786	0.96692	-7.62974	-0.108762	1.25256	-0.140466	0.894252	0.952412	-7.40909	0.227308	1.09767	0.253174	0.810948	0.904073	-7.35185	148	61	71	137	78	29	50	204	36	814
9930021J03Rik	ENSMUSG00000046138,15	0.150706	5.80401	2.01998	0.104861	0.96692	-6.69719	0.0772285	5.73851	0.870691	0.427154	0.681259	-7.63456	-0.0765013	5.83469	-0.944732	0.391277	0.589539	-7.77383	1653	1925	1866	2071	1879	2114	1842	1900	1497	16747
9930104L06Rik	ENSMUSG00000044730,17	0.0589136	3.06826	1.61843	0.171321	0.96692	-6.8769	0.0278613	3.02448	1.17804	0.294128	0.525712	-7.0144	-0.0345919	3.07466	-1.1277	0.312461	0.499849	-7.16447	270	287	284	304	278	298	261	270	249	2501
A030001D20Rik	ENSMUSG00000110357,1	-0.0380874	2.38339	-0.216788	0.837737	0.96692	-7.99053	0.001154	2.37382	0.00592707	0.99552	0.997696	-7.63803	0.0362683	2.37462	0.227893	0.829413	0.916155	-7.66218	217	174	155	183	196	152	199	163	135	1574
A130010J15Rik	ENSMUSG00000079144,7	0.148687	3.04251	1.41411	0.221848	0.96692	-7.12328	0.0723475	2.97594	0.736001	0.497629	0.715363	-7.4306	-0.079838	3.07164	-1.60485	0.173834	0.332681	-6.60104	228	283	294	296	286	310	252	265	249	2463
A230057D06Rik	ENSMUSG00000109394,2	-0.133047	1.6172	-0.630819	0.558419	0.96692	-7.63538	-0.150436	1.58131	-0.777173	0.475224	0.695102	-7.14248	-0.0211195	1.53395	-0.133388	0.899468	0.940999	-7.48549	98	139	96	116	106	81	104	84	82	906
A230072C01Rik	ENSMUSG00000086877,7	0.00784095	1.83943	0.0241873	0.981726	0.998181	-7.91286	0.00757987	1.80861	0.0277358	0.979039	0.991131	-7.53174	-0.003146	1.8366	-0.0133187	0.989926	0.99404	-7.56854	83	154	139	95	131	149	131	101	103	1086
A230077H06Rik	ENSMUSG00000100600,6	-0.0241176	3.18816	-0.175065	0.868535	0.96692	-8.13767	-0.519435	2.91162	-3.43935	0.0211834	0.129487	-4.17877	-0.498446	2.92015	-4.10946	0.0108081	0.201968	-3.49373	287	284	378	358	276	300	209	227	165	2484
A2m	ENSMUSG00000030111,9	0.18244	4.43044	0.713357	0.510459	0.96692	-8.02789	-0.0160622	4.30474	-0.128371	0.903294	0.953511	-7.90956	-0.202939	4.41505	-0.753399	0.487596	0.654801	-7.75203	708	625	748	1171	619	671	541	713	625	6421
A2ml1	ENSMUSG00000047228,9	-0.105639	5.88501	-1.0294	0.354779	0.96692	-7.90072	0.0338569	5.92576	0.232395	0.826245	0.933868	-8.04552	0.136332	5.89412	0.820652	0.451867	0.639196	-7.8954	2008	2226	2051	1797	1947	2133	2429	1794	1697	18082
A330102I10Rik	ENSMUSG00000086363,7	0.151207	2.10119	0.993534	0.370219	0.96692	-7.42079	0.116413	2.05549	0.59133	0.582241	0.786105	-7.37483	-0.0383847	2.15191	-0.290418	0.784005	0.886395	-7.59158	117	171	133	157	148	159	166	122	126	1299
A3galt2	ENSMUSG00000028794,13	0.00154766	6.01804	0.0104665	0.992091	0.998181	-8.49519	0.0989597	6.03895	0.5453	0.611008	0.803575	-7.91296	0.0932991	6.06064	0.799625	0.46282	0.64434	-7.93441	1820	2660	2235	2231	2262	2179	2307	1895	2295	19884
A430005L14Rik	ENSMUSG00000047613,10	-0.0369442	2.68409	-0.546119	0.610627	0.96692	-7.89739	0.107575	2.72715	1.08312	0.332403	0.575888	-7.0658	0.141786	2.72927	1.29465	0.256028	0.436623	-6.90464	213	230	223	227	230	196	215	256	186	1976
A430033K04Rik	ENSMUSG00000056014,15	0.0117969	3.96439	0.136713	0.897087	0.96692	-8.25384	-0.102733	3.87874	-2.70164	0.0460894	0.129487	-5.21004	-0.117919	3.90515	-1.25786	0.267942	0.445756	-7.17157	526	529	537	572	581	466	476	468	407	4562
A4galt	ENSMUSG00000047878,13	-0.192052	3.54436	-1.95444	0.113606	0.96692	-6.51863	-0.101529	3.56161	-0.679424	0.529642	0.7435	-7.56079	0.0871461	3.48555	0.689443	0.523442	0.687825	-7.65058	471	420	390	413	351	360	311	432	349	3497
A530017D24Rik	ENSMUSG00000072847,4	0.0600297	3.33227	1.22805	0.279033	0.96692	-7.38454	0.0781075	3.31295	1.20122	0.288026	0.516869	-7.0313	0.0145044	3.36398	0.2748	0.795264	0.89394	-7.85674	311	341	359	358	345	354	350	316	305	3039
A630052C17Rik	ENSMUSG00000086725,1	0.147109	1.7014	1.11617	0.319701	0.96692	-7.21439	0.189444	1.69324	1.38681	0.229138	0.443346	-6.5352	0.0391098	1.78828	0.239106	0.821206	0.911405	-7.52295	94	111	111	115	103	135	132	103	95	999
A630072M18Rik	ENSMUSG00000101013,1	-0.0333431	2.00813	-0.127478	0.903992	0.96692	-7.93697	0.0713046	2.03217	0.297805	0.77887	0.908365	-7.52173	0.100997	2.03718	0.901598	0.411558	0.608543	-7.16208	97	151	181	148	114	149	139	137	122	1238
A630089N07Rik	ENSMUSG00000116673,1	-0.108504	2.15251	-1.61846	0.172106	0.96692	-6.71503	-0.0240951	2.16665	-0.508113	0.634478	0.818516	-7.4479	0.080577	2.1335	1.15692	0.303291	0.489208	-6.92558	152	152	168	149	135	156	138	143	141	1334
A730017L22Rik	ENSMUSG00000085566,1	0.0460396	2.16877	0.236268	0.823469	0.96692	-7.94451	0.00691397	2.12138	0.0352539	0.97336	0.987887	-7.59103	-0.0432172	2.16634	-0.467071	0.661522	0.797038	-7.5163	114	160	187	157	169	144	144	130	140	1345
A730020E08Rik	ENSMUSG00000097924,2	0.225356	1.59625	0.914787	0.406093	0.96692	-7.39514	0.0575533	1.48397	0.205496	0.845994	0.933868	-7.44303	-0.17184	1.61886	-0.941997	0.392538	0.590945	-7.02373	68	99	127	116	97	124	114	78	82	905
A730046J19Rik	ENSMUSG00000085139,1	-0.0732302	1.6074	-0.236296	0.823448	0.96692	-7.83194	-0.149035	1.53839	-0.449707	0.673379	0.843998	-7.35825	-0.0783906	1.52519	-0.468132	0.660817	0.796565	-7.364	84	85	167	98	93	115	86	109	70	907
A730089K16Rik	ENSMUSG00000103529,1	0.0510567	1.80646	0.196082	0.852983	0.96692	-7.88321	-0.295202	1.60545	-1.08263	0.3326	0.576194	-6.85695	-0.350436	1.65273	-1.48927	0.200907	0.375583	-6.42348	85	142	132	123	99	148	109	71	84	993
A830018L16Rik	ENSMUSG00000057715,13	0.0246024	5.99671	0.189475	0.857864	0.96692	-8.47124	0.0923631	6.00179	0.619243	0.56522	0.773183	-7.86089	0.0643675	6.03544	0.538373	0.615087	0.761833	-8.12428	1806	2346	2383	2096	2211	2327	2463	1979	1890	19501
A830082K12Rik	ENSMUSG00000087143,9	-0.0634401	2.32261	-0.312418	0.768503	0.96692	-7.94873	-0.0117481	2.31906	-0.0851541	0.935731	0.968165	-7.62368	0.0490779	2.30793	0.212422	0.840778	0.916155	-7.65112	161	171	192	187	124	202	157	192	128	1514
A830082N09Rik	ENSMUSG00000112280,1	0.128794	4.16677	0.793441	0.46679	0.96692	-7.93095	0.0338385	4.0908	0.210233	0.842506	0.933868	-7.86846	-0.0986193	4.17682	-1.03174	0.352868	0.548021	-7.45973	464	645	672	606	657	671	590	514	537	5356
A930004D18Rik	ENSMUSG00000054057,2	-0.149963	3.73412	-2.33948	0.0714393	0.96692	-6.04497	-0.161891	3.70032	-1.30073	0.254887	0.478556	-6.97094	-0.0159608	3.64608	-0.133713	0.899225	0.940999	-7.94312	456	515	466	440	415	444	444	341	389	3910
A930005H10Rik	ENSMUSG00000054426,11	-0.0544247	2.07375	-0.442187	0.678536	0.96692	-7.84317	-0.0121806	2.0664	-0.0934474	0.929493	0.964462	-7.57603	0.0393596	2.05832	0.317715	0.764475	0.872958	-7.5603	151	158	131	166	129	131	136	152	110	1264
A930006K02Rik	ENSMUSG00000084866,2	0.0346224	1.34796	0.155534	0.88305	0.96692	-7.79644	-0.0264862	1.28689	-0.0942178	0.928914	0.964095	-7.42314	-0.0635165	1.32407	-0.36217	0.733105	0.84884	-7.36676	115	67	81	93	91	80	92	85	56	760
AA388235	ENSMUSG00000118084,1	0.169518	1.72956	1.12748	0.315362	0.96692	-7.20796	-0.0855969	1.5732	-0.560035	0.601707	0.796762	-7.30151	-0.258069	1.67888	-2.661	0.0482701	0.201968	-4.92717	96	129	97	116	130	115	84	102	88	957
AA414768	ENSMUSG00000083307,1	-0.141561	1.8766	-0.904609	0.410931	0.96692	-7.4623	-0.260088	1.78801	-1.5943	0.176998	0.365414	-6.29928	-0.121988	1.73847	-0.978597	0.375933	0.573931	-7.01709	157	116	124	110	126	123	115	93	92	1056
AA986860	ENSMUSG00000042510,7	0.032192	2.21127	0.186163	0.860314	0.96692	-7.96539	0.172269	2.25203	1.26364	0.266802	0.48678	-6.78404	0.137198	2.28829	0.714324	0.509282	0.675295	-7.38049	171	148	150	169	191	127	186	168	130	1440
Aaas	ENSMUSG00000036678,8	0.00454781	4.00277	0.0557536	0.957898	0.996576	-8.26812	-0.0470884	3.94896	-0.739096	0.495918	0.713717	-7.56436	-0.055317	3.97149	-0.85474	0.434533	0.631432	-7.59724	578	546	517	598	496	561	506	481	457	4740
Aacs	ENSMUSG00000029482,4	-0.0301963	7.07132	-0.382718	0.719117	0.96692	-8.51502	-0.0582808	7.02945	-0.416256	0.695985	0.855425	-8.06908	-0.032144	7.03497	-0.245236	0.816731	0.908039	-8.38064	4969	4650	4330	4584	4753	4363	4500	3488	4256	39893
Aagab	ENSMUSG00000037257,8	0.0680375	5.02029	1.23301	0.277346	0.96692	-7.58949	0.0965342	5.00652	1.45807	0.209726	0.42342	-6.93035	0.0246958	5.06135	0.368666	0.72857	0.84541	-8.08772	1044	1140	1065	1138	1179	1102	1034	1038	1088	9828
Aak1	ENSMUSG00000057230,14	0.0461769	7.10703	0.738614	0.496379	0.96692	-8.29242	-0.00936596	7.05084	-0.148616	0.88817	0.949549	-8.16097	-0.0591521	7.09496	-1.02296	0.356593	0.552153	-7.85091	4252	4747	4927	4746	4739	4933	4469	4099	4010	40922
Aamdc	ENSMUSG00000035642,16	-0.0494399	2.947	-0.342217	0.747394	0.96692	-8.04741	0.138075	3.01253	0.906299	0.409883	0.665028	-7.28845	0.184186	3.00753	1.53	0.190922	0.360141	-6.68164	309	229	271	304	240	239	255	317	237	2401
Aamp	ENSMUSG00000006299,13	-0.122723	5.79668	-0.604278	0.57446	0.96692	-8.25802	-0.0218394	5.81849	-0.100373	0.924288	0.961795	-8.06244	0.0978493	5.7774	1.23785	0.274633	0.454219	-7.45848	2630	1732	1708	1866	1805	1808	1999	1821	1532	16901
Aar2	ENSMUSG00000027628,10	0.0841347	4.34367	0.778018	0.474977	0.96692	-7.96542	0.0633922	4.30493	0.588739	0.583838	0.787161	-7.71644	-0.0241968	4.36793	-1.06381	0.337445	0.529253	-7.45811	574	761	698	730	706	714	663	653	605	6104
Aard	ENSMUSG00000068522,4	-0.0928156	1.51844	-0.610508	0.570668	0.96692	-7.62903	-0.116965	1.4765	-0.795625	0.465428	0.692601	-7.10638	-0.0272936	1.4525	-0.213874	0.839709	0.916155	-7.44897	83	109	112	86	102	97	97	82	75	843
Aars	ENSMUSG00000031960,14	-0.0375908	7.22747	-0.434105	0.683982	0.96692	-8.50601	-0.118966	7.15888	-0.930879	0.398292	0.654083	-7.70012	-0.0852621	7.16056	-0.884206	0.419971	0.617613	-7.99294	5791	4953	4865	5256	5042	4924	4817	3905	4362	43915
Aars2	ENSMUSG00000023938,8	-0.0718569	4.14706	-0.56005	0.601839	0.96692	-8.10313	-0.0577466	4.12616	-0.418914	0.694175	0.854715	-7.79445	0.0102727	4.11056	0.166249	0.874949	0.928811	-8.01474	732	586	556	610	568	599	571	516	540	5278
Aasdh	ENSMUSG00000055923,16	0.0535891	2.6698	1.02153	0.358122	0.96692	-7.49859	-0.0171287	2.60507	-0.242865	0.818597	0.9295	-7.6436	-0.073548	2.6531	-0.987639	0.371921	0.569829	-7.21816	208	205	226	218	230	218	190	216	170	1881
Aasdhppt	ENSMUSG00000025894,11	0.0521008	4.51383	0.182644	0.862918	0.96692	-8.31151	0.141365	4.52954	0.540588	0.614001	0.805021	-7.77189	0.0858548	4.57776	0.740463	0.4947	0.661556	-7.78727	512	902	970	712	797	896	781	775	750	7095
Aatf	ENSMUSG00000018697,14	-0.101151	4.29695	-0.880644	0.422504	0.96692	-7.86975	-0.085591	4.27625	-0.640269	0.552613	0.762845	-7.67737	0.0122365	4.24601	0.163318	0.87713	0.930112	-8.03636	803	665	629	672	659	621	672	588	534	5843
Aatk	ENSMUSG00000025375,15	0.111252	6.51737	1.26245	0.267515	0.96692	-7.71371	-0.0647955	6.40204	-0.595865	0.579454	0.784042	-7.91168	-0.180468	6.47813	-1.3243	0.246787	0.426843	-7.4458	2991	2890	3158	3643	2831	3373	2529	2437	2922	26774
Abat	ENSMUSG00000057880,12	0.0885554	6.19164	1.47664	0.205285	0.96692	-7.42727	0.0972958	6.16784	1.16509	0.301003	0.534983	-7.37613	0.00526824	6.23272	0.0634987	0.952009	0.971084	-8.31702	2287	2373	2615	2839	2390	2544	2187	2680	2231	22146
Abca1	ENSMUSG00000015243,4	0.0948838	6.12256	0.828498	0.448575	0.96692	-8.11637	0.107667	6.10054	0.610765	0.570355	0.777435	-7.87546	0.00978681	6.1684	0.0549616	0.958453	0.975397	-8.30966	2042	2360	2535	2882	2175	2400	2001	2950	1945	21290
Abca2	ENSMUSG00000026944,18	0.0260151	6.59477	0.262563	0.804335	0.96692	-8.51288	-0.0809425	6.5133	-0.718803	0.507211	0.724078	-7.83135	-0.110673	6.54672	-1.4155	0.220305	0.396741	-7.3463	3642	3219	2989	3469	3457	3118	3054	2641	2763	28352
Abca3	ENSMUSG00000024130,16	0.150172	7.88796	5.04438	0.00510637	0.853502	-3.45137	-0.0214959	7.7741	-0.238338	0.821902	0.931099	-8.198	-0.175555	7.86987	-1.9665	0.110744	0.228547	-6.80554	7852	7557	7637	8768	8587	8324	7578	6259	6883	69445
Abca4	ENSMUSG00000028125,14	-0.206061	1.14624	-0.345992	0.744738	0.96692	-7.69553	0.0736868	1.25868	0.11652	0.912171	0.955861	-7.41489	0.278436	1.16975	0.359747	0.734801	0.850103	-7.33058	121	62	71	131	81	32	46	183	54	781
Abca5	ENSMUSG00000018800,14	-0.067205	6.93877	-0.287522	0.786319	0.96692	-8.53957	0.0286408	6.95781	0.118194	0.910916	0.95571	-8.15825	0.0921184	6.94608	0.477804	0.654411	0.792662	-8.27108	3163	4924	5054	3586	4174	4651	4858	3415	3799	37624
Abca6	ENSMUSG00000044749,13	0.196661	4.05325	0.996588	0.368882	0.96692	-7.72866	0.0527859	3.95246	0.30244	0.775552	0.906613	-7.82373	-0.147128	4.07248	-1.29897	0.254661	0.436623	-7.15121	409	628	576	554	680	601	537	490	473	4948
Abca7	ENSMUSG00000035722,15	0.0194858	6.35993	0.310754	0.769688	0.96692	-8.4723	-0.0397659	6.30234	-0.295925	0.780217	0.908946	-8.0584	-0.0632916	6.3329	-0.466507	0.661897	0.797354	-8.20258	2866	2833	2664	2770	2886	2853	2770	2108	2571	24321
Abca8a	ENSMUSG00000041828,15	0.347167	7.37055	2.19912	0.084431	0.96692	-6.62364	0.190577	7.26376	1.25537	0.269527	0.490719	-7.3675	-0.16032	7.45871	-2.4091	0.0647601	0.201968	-6.17995	3971	5372	5893	6231	6226	6770	5435	5131	5052	50081
Abca8b	ENSMUSG00000020620,14	0.27463	6.33072	2.00959	0.106198	0.96692	-6.76507	0.0984484	6.21452	0.740797	0.494981	0.712913	-7.78823	-0.179985	6.37274	-2.2119	0.0820151	0.201968	-6.30732	2058	2649	2863	3261	2724	3151	2638	2355	2324	24023
Abca9	ENSMUSG00000041797,7	-0.0629843	4.93526	-0.366406	0.730446	0.96692	-8.29894	0.011693	4.94437	0.0311976	0.976424	0.989563	-7.98596	0.0719679	4.93254	0.17875	0.865663	0.923564	-8.13232	1086	988	1137	1354	937	850	654	1703	841	9550
Abcb10	ENSMUSG00000031974,8	0.0847907	4.36578	0.869663	0.427893	0.96692	-7.88801	0.084313	4.3376	0.831783	0.446676	0.692601	-7.53139	-0.00443204	4.40111	-0.0488756	0.963049	0.978244	-8.07445	601	720	737	721	781	685	638	647	695	6225
Abcb1a	ENSMUSG00000040584,8	0.065044	3.27416	0.184662	0.861425	0.96692	-8.14879	0.288619	3.35509	0.390742	0.713479	0.866042	-7.70842	0.223828	3.40567	0.316253	0.765517	0.873554	-7.85025	481	248	283	474	314	260	214	1003	211	3488
Abcb4	ENSMUSG00000042476,12	-0.164206	1.50094	-1.18933	0.292546	0.96692	-7.09336	0.0618045	1.58576	0.377039	0.72296	0.872099	-7.40372	0.222668	1.52303	2.01341	0.104517	0.217222	-5.73048	109	113	86	100	85	89	114	93	85	874
Abcb7	ENSMUSG00000031333,7	-0.0312789	4.9761	-0.139765	0.894808	0.96692	-8.3722	0.00386253	4.96502	0.0180349	0.986369	0.99376	-7.98839	0.0315554	4.97108	0.367591	0.72932	0.84585	-8.07596	786	1214	1341	1019	1030	1161	1054	973	949	9527
Abcb8	ENSMUSG00000028973,18	-0.0557935	4.51077	-3.18817	0.0261996	0.96692	-5.04688	-0.0364069	4.49248	-1.37338	0.230739	0.443346	-6.98017	0.0156044	4.48523	0.492151	0.644786	0.785343	-7.94523	774	794	813	808	759	734	705	710	697	6794
Abcb9	ENSMUSG00000029408,13	0.0140183	4.60193	0.117804	0.911235	0.968127	-8.33354	0.0181461	4.57576	0.111444	0.915977	0.957618	-7.94145	0.000473088	4.60322	0.00390186	0.997049	0.998073	-8.10541	956	790	744	844	862	804	901	681	715	7297
Abcc1	ENSMUSG00000023088,17	0.09439	4.96522	2.10107	0.095022	0.96692	-6.50206	0.0331953	4.90664	0.359599	0.735112	0.88075	-7.90528	-0.0650873	4.97451	-0.63283	0.556663	0.717496	-7.9239	1019	1038	1040	1144	1152	1028	1081	872	942	9316
Abcc10	ENSMUSG00000032842,13	0.0411545	2.17224	0.338122	0.75028	0.96692	-7.91023	-0.0226914	2.11293	-0.210138	0.842576	0.933868	-7.56339	-0.0679018	2.15304	-0.732606	0.499052	0.665706	-7.33446	171	145	140	176	158	137	146	131	130	1334
Abcc4	ENSMUSG00000032849,14	-0.00399626	4.71254	-0.0308634	0.976683	0.998181	-8.35401	-0.0137526	4.67966	-0.106654	0.919571	0.959081	-7.95289	-0.0138512	4.69895	-0.136146	0.897405	0.940825	-8.10778	769	891	1050	899	825	976	824	761	842	7837
Abcc5	ENSMUSG00000022822,16	0.0361017	6.53079	0.307326	0.772133	0.96692	-8.49107	-0.00520479	6.48211	-0.0362678	0.972594	0.987503	-8.12589	-0.0451306	6.52093	-0.520632	0.62646	0.771018	-8.19484	2680	3637	3112	3310	3136	3189	3133	2586	2791	27574
Abcc8	ENSMUSG00000040136,10	0.123267	4.4497	1.65694	0.164069	0.96692	-7.01501	0.0422989	4.38157	0.29517	0.780759	0.909174	-7.87566	-0.0851827	4.4638	-0.657516	0.542008	0.704579	-7.83394	749	740	659	783	787	775	737	574	711	6515
Abcc9	ENSMUSG00000030249,15	0.512505	4.46393	1.67221	0.160988	0.96692	-6.99602	0.178877	4.26959	0.574512	0.592652	0.792661	-7.72192	-0.337525	4.5469	-1.77261	0.14092	0.278438	-6.63892	414	709	854	1064	728	953	540	760	670	6692
Abcd1	ENSMUSG00000031378,14	0.0704023	3.48122	0.481319	0.652497	0.96692	-8.06225	0.0608062	3.44819	0.3639	0.732106	0.87861	-7.73375	-0.0126579	3.50288	-0.0885464	0.93313	0.958451	-7.92337	426	371	326	458	347	378	322	433	314	3375
Abcd2	ENSMUSG00000055782,9	0.0768746	3.94024	0.429606	0.687023	0.96692	-8.15179	0.0767897	3.91132	0.458596	0.667437	0.839717	-7.74873	-0.00332573	3.97131	-0.0310141	0.976546	0.98713	-8.00864	399	560	593	527	497	603	543	489	441	4652
Abcd3	ENSMUSG00000028127,10	0.0753117	6.73642	0.661943	0.539988	0.96692	-8.31402	0.072188	6.70651	0.671265	0.534374	0.747824	-7.88423	-0.00676266	6.76523	-0.130213	0.901845	0.942009	-8.37428	2993	3817	3907	3794	3556	3922	3536	3384	3266	32175
Abcd4	ENSMUSG00000021240,6	-0.0949443	3.54151	-1.49437	0.200813	0.96692	-7.10133	0.000543081	3.56043	0.00654989	0.995049	0.997404	-7.82845	0.0922631	3.53381	1.5524	0.185638	0.351654	-6.75631	434	376	424	390	381	387	409	382	333	3516
Abce1	ENSMUSG00000058355,8	0.103945	7.36659	0.737621	0.496927	0.96692	-8.31919	0.0842891	7.3282	0.643924	0.550441	0.761229	-7.95543	-0.0232521	7.40145	-0.349662	0.741874	0.855334	-8.387	4436	5837	6202	5748	5623	6257	5529	5241	4976	49849
Abcf1	ENSMUSG00000038762,15	-0.10199	6.70939	-0.434278	0.683865	0.96692	-8.45361	-0.138017	6.66315	-0.533225	0.618695	0.807412	-7.97406	-0.0394573	6.63231	-0.357851	0.736128	0.851256	-8.29169	5156	3113	3167	3605	3487	3303	3634	2831	2785	31081
Abcf2	ENSMUSG00000028953,10	-0.00316825	6.39579	-0.0273016	0.979374	0.998181	-8.53378	-0.0268994	6.35571	-0.2337	0.825291	0.933356	-8.08278	-0.0272193	6.37456	-0.449331	0.673366	0.805781	-8.2169	3291	2795	2596	2944	3016	2701	2749	2522	2449	25063
Abcf3	ENSMUSG00000003234,16	-0.0415408	5.23391	-0.464501	0.66362	0.96692	-8.28379	0.0472541	5.25033	0.473378	0.657619	0.834275	-7.8831	0.0851281	5.24985	1.61637	0.171343	0.328741	-6.93584	1437	1298	1189	1353	1237	1228	1314	1184	1183	11423
Abcg1	ENSMUSG00000024030,7	0.115439	5.04196	0.860902	0.432231	0.96692	-7.97283	0.0741638	4.993	0.496267	0.642572	0.824415	-7.84544	-0.0450292	5.07196	-0.569204	0.595617	0.748408	-7.98022	877	1169	1230	1171	1179	1178	1145	970	999	9918
Abcg2	ENSMUSG00000029802,13	0.0679045	4.74808	0.559985	0.60188	0.96692	-8.1738	0.0182365	4.69427	0.101308	0.923586	0.961334	-7.95512	-0.0525302	4.74936	-0.403077	0.70476	0.827443	-8.02907	743	935	1035	964	952	915	747	1038	724	8053
Abcg4	ENSMUSG00000032131,16	0.020676	5.3167	0.614592	0.568191	0.96692	-8.20009	-0.0867562	5.23507	-0.879064	0.423042	0.676838	-7.58019	-0.111372	5.26602	-1.14931	0.30612	0.492482	-7.49031	1384	1294	1378	1453	1320	1359	1304	1046	1138	11676
Abhd10	ENSMUSG00000033157,17	0.199117	4.63845	1.27948	0.261976	0.96692	-7.49369	0.0999874	4.5599	0.707732	0.513448	0.729524	-7.65824	-0.102472	4.68117	-0.844006	0.439935	0.631883	-7.71389	655	834	913	833	920	1001	871	744	714	7485
Abhd11	ENSMUSG00000040532,14	0.0674953	4.37512	1.13623	0.312042	0.96692	-7.62292	0.104654	4.3657	1.85005	0.128807	0.276924	-6.37197	0.033512	4.4198	0.650884	0.545919	0.708109	-7.83266	683	729	666	788	724	676	720	672	641	6299
Abhd12	ENSMUSG00000032046,15	0.0318954	6.25444	1.18789	0.292671	0.96692	-7.77082	0.0704401	6.24548	1.70227	0.154729	0.324376	-6.74013	0.0350344	6.28203	0.981626	0.374585	0.572572	-7.79389	2513	2656	2570	2787	2576	2583	2627	2471	2302	23085
Abhd13	ENSMUSG00000040396,12	0.107988	4.60444	0.656204	0.543355	0.96692	-8.09149	0.0734478	4.55853	0.433791	0.684087	0.848545	-7.83505	-0.0379241	4.63401	-0.492178	0.644953	0.785449	-7.96641	630	839	967	853	838	909	717	853	734	7340
Abhd14a	ENSMUSG00000042210,17	0.0755478	4.81399	3.29711	0.0236148	0.96692	-4.95562	0.0873703	4.79156	3.5798	0.0171681	0.129487	-4.21512	0.00826224	4.85016	0.276944	0.793607	0.892867	-8.09409	935	915	957	1002	990	978	940	909	865	8491
Abhd14b	ENSMUSG00000042073,15	-0.117665	2.52149	-0.929225	0.399311	0.96692	-7.56273	-0.0801327	2.51207	-0.548376	0.609059	0.802325	-7.48552	0.0344671	2.47272	0.288268	0.785551	0.887365	-7.66571	201	232	182	216	172	180	162	210	158	1713
Abhd16a	ENSMUSG00000007036,15	-0.0371773	5.58909	-0.413171	0.69819	0.96692	-8.34814	-0.0154191	5.57176	-0.175643	0.868066	0.940742	-8.02748	0.0181957	5.57373	0.517472	0.628498	0.772598	-8.07836	1861	1574	1577	1662	1668	1560	1537	1508	1452	14399
Abhd17a	ENSMUSG00000003346,14	-0.0147086	5.44947	-0.182043	0.863364	0.96692	-8.41529	0.0463466	5.45209	0.512983	0.631708	0.816724	-7.87948	0.0573232	5.46517	0.762311	0.482745	0.649965	-7.88998	1632	1413	1464	1584	1531	1365	1311	1493	1430	13223
Abhd17b	ENSMUSG00000047368,4	0.125103	5.6664	0.478345	0.654456	0.96692	-8.32232	0.145983	5.64816	0.606803	0.572765	0.779028	-7.83776	0.0172197	5.73253	0.160281	0.879391	0.931575	-8.24118	1154	1843	2149	1724	1682	2079	1711	1680	1626	15648
Abhd17c	ENSMUSG00000038459,10	0.0604532	5.30328	0.569364	0.596007	0.96692	-8.22893	0.0658523	5.27734	0.653811	0.544594	0.756252	-7.77014	0.00197934	5.32882	0.0466753	0.964711	0.979234	-8.20326	1139	1330	1518	1370	1355	1425	1287	1319	1170	11913
Abhd18	ENSMUSG00000037818,16	-0.119762	2.18267	-0.8284	0.448625	0.96692	-7.59148	0.116939	2.27143	0.518569	0.628101	0.81358	-7.46089	0.234606	2.23211	1.19731	0.288666	0.470861	-6.90376	137	191	160	159	133	156	139	216	133	1424
Abhd2	ENSMUSG00000039202,12	0.144547	6.99752	1.22561	0.279868	0.96692	-7.80411	-0.0139082	6.89021	-0.112078	0.915501	0.957509	-8.15348	-0.162352	6.98343	-2.11253	0.0925508	0.201968	-6.51123	3489	4368	4692	4851	4242	4755	4028	3545	3668	37638
Abhd3	ENSMUSG00000002475,16	0.210362	3.32211	1.56886	0.183053	0.96692	-6.97739	0.120015	3.24745	1.33118	0.245481	0.464859	-6.87338	-0.0931206	3.3742	-0.703345	0.515497	0.680653	-7.61828	292	308	354	354	330	429	335	337	272	3011
Abhd4	ENSMUSG00000040997,13	0.168918	6.47053	1.73637	0.148667	0.96692	-7.13158	0.0418993	6.37886	0.357494	0.736584	0.881819	-8.04114	-0.13061	6.48407	-1.58591	0.178007	0.339531	-7.12957	2614	2681	3326	3562	3060	3076	2468	3042	2551	26380
Abhd5	ENSMUSG00000032540,16	0.0555653	6.58085	0.390196	0.71395	0.96692	-8.46188	0.125906	6.58733	0.918679	0.404011	0.659607	-7.66431	0.0668183	6.63649	0.685979	0.525435	0.689399	-8.09683	2637	3481	3589	3175	3282	3602	3531	3064	2981	29342
Abhd6	ENSMUSG00000025277,14	-0.0202221	3.91146	-0.280664	0.791254	0.96692	-8.21078	-0.0668711	3.85926	-0.904018	0.410972	0.66597	-7.40977	-0.0498005	3.87007	-0.582082	0.587598	0.743104	-7.79389	524	485	544	519	473	547	493	464	395	4444
Abhd8	ENSMUSG00000007950,9	0.0753505	5.48917	0.844093	0.44065	0.96692	-8.03621	0.061722	5.4545	0.727493	0.502353	0.719711	-7.73067	-0.0174094	5.51253	-0.305339	0.773306	0.879324	-8.17243	1652	1396	1448	1704	1601	1447	1391	1446	1421	13506
Abi1	ENSMUSG00000058835,14	0.0541139	6.48071	0.432392	0.685138	0.96692	-8.43126	0.0516712	6.45082	0.444988	0.676544	0.845483	-8.00608	-0.00590519	6.49919	-0.0848143	0.93594	0.960333	-8.34786	2506	3187	3355	2999	3097	3276	3020	2822	2637	26899
Abi2	ENSMUSG00000026782,15	0.0315989	6.55099	0.170983	0.871564	0.96692	-8.53235	0.0179173	6.51539	0.104548	0.921152	0.95992	-8.12291	-0.0172114	6.55271	-0.154395	0.883777	0.933311	-8.34431	2473	3401	3773	3105	3040	3646	3236	2838	2703	28215
Abi3bp	ENSMUSG00000035258,15	0.127943	4.57966	1.60022	0.176055	0.96692	-7.1012	0.163737	4.56797	0.629498	0.559047	0.767964	-7.71706	0.033785	4.65272	0.128979	0.902768	0.942173	-8.10247	794	786	763	859	785	933	646	1199	647	7412
Abitram	ENSMUSG00000038827,11	0.16614	4.08999	1.27942	0.261995	0.96692	-7.42863	0.0197687	3.98897	0.156602	0.882219	0.94723	-7.86833	-0.150405	4.09319	-1.64184	0.165963	0.320091	-6.73808	460	575	624	636	560	664	491	501	528	5039
Abl1	ENSMUSG00000026842,16	0.070829	5.56024	0.962449	0.384053	0.96692	-7.93333	0.0453432	5.51978	0.4893	0.647132	0.827682	-7.89945	-0.0291797	5.57537	-0.264667	0.802599	0.89806	-8.19434	1601	1568	1550	1897	1597	1503	1316	1658	1475	14165
Abl2	ENSMUSG00000026596,13	0.0845753	5.55109	1.64947	0.1656	0.96692	-7.14619	0.0450377	5.50317	0.824255	0.450532	0.692601	-7.65446	-0.0432477	5.56633	-1.3608	0.235844	0.412074	-7.28916	1426	1605	1642	1697	1614	1657	1460	1474	1445	14020
Ablim1	ENSMUSG00000025085,16	0.1046	8.10097	2.10236	0.0948728	0.96692	-6.82185	0.0213046	8.03111	0.333943	0.75315	0.89273	-8.18519	-0.0870349	8.10427	-1.62173	0.170198	0.32703	-7.27536	8354	9347	9473	9941	9909	9453	8865	8058	8154	81554
Ablim2	ENSMUSG00000029095,17	-0.0559026	4.28369	-0.387093	0.716092	0.96692	-8.21471	-0.0433793	4.26137	-0.26953	0.799227	0.918186	-7.87077	0.00932697	4.25365	0.101386	0.923472	0.952338	-8.04744	809	651	592	680	609	677	684	595	525	5822
Ablim3	ENSMUSG00000032735,15	0.016304	7.43234	0.206657	0.845187	0.96692	-8.61312	-0.0718303	7.35993	-0.752145	0.488754	0.706801	-7.87484	-0.0916621	7.38877	-1.27372	0.262743	0.439173	-7.61362	6423	5604	5610	5930	6087	5857	5603	4853	4812	50779
Abr	ENSMUSG00000017631,19	0.0245466	7.57816	0.472048	0.658616	0.96692	-8.52096	-0.0630623	7.50646	-0.914671	0.405904	0.661608	-7.74356	-0.0915415	7.5394	-1.20132	0.28725	0.469089	-7.71307	6188	6734	6507	6882	6838	6136	5795	5344	5788	56212
Abracl	ENSMUSG00000078453,3	-0.0319532	3.09829	-0.336996	0.751075	0.96692	-8.07405	-0.0177294	3.07815	-0.425186	0.68964	0.851872	-7.65037	0.0101188	3.08208	0.105818	0.920141	0.950086	-7.83973	281	305	301	341	280	255	258	278	261	2560
Abraxas1	ENSMUSG00000035234,18	0.133366	2.28202	1.61941	0.171904	0.96692	-6.73841	0.10783	2.2412	1.09504	0.327664	0.569616	-6.96714	-0.0291436	2.32778	-0.251159	0.812415	0.905126	-7.6446	152	166	157	199	156	170	180	152	136	1468
Abraxas2	ENSMUSG00000030965,19	0.0708106	5.08649	0.720053	0.506699	0.96692	-8.097	0.0366842	5.04099	0.385127	0.717357	0.868102	-7.90725	-0.0375626	5.09741	-0.716908	0.507827	0.673887	-7.87786	980	1176	1258	1227	1119	1240	1034	1143	997	10174
Abt1	ENSMUSG00000036376,3	-0.246579	2.9956	-2.19767	0.0845785	0.96692	-6.11981	-0.190514	2.99523	-1.30723	0.252851	0.475328	-6.86112	0.0523585	2.89251	0.530325	0.620231	0.766331	-7.64161	342	265	287	255	253	244	274	219	219	2358
Abtb1	ENSMUSG00000030083,11	-0.0572493	3.23277	-0.695414	0.520633	0.96692	-7.88319	-0.00706313	3.22953	-0.0722838	0.945422	0.973556	-7.77804	0.0466493	3.22117	0.852715	0.435549	0.631883	-7.4647	358	325	301	330	311	306	325	292	273	2821
Abtb2	ENSMUSG00000032724,5	0.0540024	5.68826	0.658336	0.542102	0.96692	-8.20841	-0.00774938	5.62921	-0.1347	0.89856	0.953511	-8.04042	-0.0653185	5.67673	-0.88931	0.417488	0.614972	-7.80606	1830	1661	1699	1892	1916	1612	1656	1563	1477	15306
AC115893,1	ENSMUSG00000118426,1	-0.397813	1.79916	-2.87581	0.0387258	0.96692	-5.03405	-0.287992	1.82818	-1.35262	0.239055	0.455003	-6.59952	0.104672	1.64894	0.566893	0.597063	0.749665	-7.336	159	132	120	111	106	94	112	81	115	1030
AC156546,1	ENSMUSG00000118018,1	0.0730326	4.19765	0.383138	0.718826	0.96692	-8.2061	0.181793	4.22331	0.972384	0.379327	0.635526	-7.38771	0.105426	4.28134	1.40613	0.222895	0.400664	-7.05825	461	722	683	617	660	660	685	622	587	5697
Acaa1a	ENSMUSG00000036138,16	-0.0528772	3.81513	-0.7341	0.498875	0.96692	-7.93541	-0.0304257	3.79881	-0.353073	0.739682	0.883878	-7.78478	0.0184791	3.79253	0.235898	0.823551	0.912741	-7.946	524	471	475	526	450	448	403	462	445	4204
Acaa2	ENSMUSG00000036880,10	0.0330094	5.89756	0.189379	0.857935	0.96692	-8.4609	0.0888355	5.89732	0.528728	0.621572	0.808463	-7.91057	0.0525317	5.93383	0.652468	0.544983	0.707221	-8.03491	2518	1754	1849	2321	2068	1839	1969	2138	1752	18208
Acaca	ENSMUSG00000020532,18	0.0665772	6.59107	0.975837	0.378043	0.96692	-8.02715	0.00193529	6.53062	0.0266551	0.979856	0.991364	-8.1304	-0.0683878	6.5847	-0.839419	0.44226	0.631883	-7.96418	3034	3397	3232	3420	3591	3154	3146	2773	2888	28635
Acacb	ENSMUSG00000042010,16	-0.0389006	1.74665	-0.33213	0.754512	0.96692	-7.82813	0.109048	1.79261	0.49286	0.6448	0.82586	-7.38556	0.144678	1.79325	0.679002	0.529465	0.693113	-7.29241	119	101	129	131	108	102	89	152	108	1039
Acad11	ENSMUSG00000090150,10	0.0313039	3.9853	0.435056	0.68334	0.96692	-8.15485	0.0871768	3.98488	1.16697	0.300313	0.534103	-7.15771	0.0523892	4.02145	2.34262	0.0677156	0.201968	-5.80702	476	545	589	573	543	531	539	532	481	4809
Acad12	ENSMUSG00000042647,13	0.245966	1.4177	2.23313	0.0810619	0.96692	-5.77585	0.165818	1.3497	1.21552	0.283031	0.509851	-6.66465	-0.0839652	1.4935	-0.790368	0.467705	0.64434	-7.13115	95	78	78	96	103	99	76	89	91	805
Acad8	ENSMUSG00000031969,16	-0.0426024	3.85999	-1.46099	0.208062	0.96692	-7.18529	-0.0175018	3.84425	-0.211474	0.841593	0.933868	-7.83829	0.0216684	3.84359	0.283733	0.788817	0.889594	-7.93972	515	496	498	506	487	478	411	509	441	4341
Acad9	ENSMUSG00000027710,14	0.0773719	4.60449	1.50972	0.197019	0.96692	-7.21612	0.0295962	4.5524	0.693692	0.521436	0.736855	-7.6682	-0.0513179	4.61171	-1.36045	0.235947	0.412215	-7.16095	753	826	850	923	852	799	777	779	699	7258
Acadl	ENSMUSG00000026003,5	-0.0108921	7.20919	-0.284187	0.788718	0.96692	-8.56793	0.0223091	7.19729	0.424669	0.690264	0.852036	-8.07873	0.0298864	7.21264	0.687295	0.524677	0.688844	-8.1649	4764	5184	5287	5220	4870	5084	4980	4893	4222	44504
Acadm	ENSMUSG00000062908,12	-0.0454191	6.24471	-1.42036	0.220136	0.96692	-7.5008	0.0781529	6.2777	1.1711	0.298809	0.531886	-7.37912	0.12055	6.27579	1.77574	0.140371	0.277511	-6.86359	2647	2597	2649	2572	2609	2500	2657	2766	2190	23187
Acads	ENSMUSG00000029545,13	0.00478267	3.22599	0.0395145	0.970152	0.998181	-8.16119	0.212608	3.30095	1.35367	0.238746	0.454555	-6.85498	0.204924	3.32366	1.7105	0.152294	0.29747	-6.51821	364	277	321	344	330	291	319	408	290	2944
Acadsb	ENSMUSG00000030861,15	0.0166612	5.2807	0.147206	0.889256	0.96692	-8.40416	0.0649789	5.27591	0.434268	0.683765	0.848316	-7.90621	0.0454621	5.30517	0.39575	0.709799	0.831324	-8.108	1123	1365	1499	1423	1229	1378	1292	1479	1034	11822
Acadvl	ENSMUSG00000018574,14	-0.0454249	5.0834	-0.40349	0.70481	0.96692	-8.29843	0.0396429	5.09731	0.308151	0.771472	0.904339	-7.94437	0.0819814	5.09501	1.28341	0.259613	0.436623	-7.31777	1364	1057	1129	1206	1142	1087	1133	1221	959	10298
Acan	ENSMUSG00000030607,7	-0.872566	1.64663	-1.56422	0.184112	0.96692	-6.67183	0.219156	2.1644	0.389213	0.714534	0.866607	-7.50931	1.0874	1.75065	2.21348	0.0818591	0.201968	-5.50968	199	75	200	72	122	56	91	208	189	1212
Acap2	ENSMUSG00000049076,11	0.13036	5.81644	0.696729	0.519883	0.96692	-8.19303	0.140296	5.79294	0.745628	0.492322	0.71055	-7.74707	0.0064917	5.87929	0.242812	0.818429	0.909223	-8.23978	1374	2138	2117	2067	1976	2025	1841	1972	1728	17238
Acap3	ENSMUSG00000029033,16	0.126087	6.95146	4.34917	0.0090886	0.96692	-4.03977	0.0661145	6.89355	0.930233	0.398593	0.654171	-7.67905	-0.0638856	6.97723	-0.883829	0.420155	0.617802	-7.97149	4068	4073	4000	4587	4466	4255	4059	3603	3918	37029
Acat1	ENSMUSG00000032047,5	0.0575161	7.67286	0.958666	0.385766	0.96692	-8.15262	0.0314144	7.63123	0.441037	0.679201	0.846581	-8.10525	-0.029232	7.68064	-0.621419	0.563525	0.723651	-8.26751	7256	6744	6520	7208	7195	7016	6678	6755	5674	61046
Acat2	ENSMUSG00000023832,14	0.0264619	6.20529	0.266868	0.801217	0.96692	-8.47156	-0.0630353	6.13314	-0.378672	0.721828	0.871424	-8.01052	-0.0939134	6.16706	-0.690835	0.522643	0.68703	-8.03531	2204	2850	2479	2662	2505	2497	2245	1874	2452	21768
Acbd3	ENSMUSG00000026499,5	-0.0462776	6.17338	-0.797042	0.464893	0.96692	-8.14888	-0.0645272	6.13566	-1.59057	0.177822	0.366857	-6.87103	-0.0216079	6.13344	-0.324713	0.759501	0.869079	-8.2438	2531	2464	2519	2392	2342	2580	2333	2197	2016	21374
Acbd4	ENSMUSG00000056938,16	-0.0313054	3.12791	-0.255988	0.809105	0.96692	-8.10732	0.122208	3.17673	0.963122	0.383493	0.639554	-7.25986	0.149602	3.1813	3.22689	0.0258573	0.201968	-4.5559	354	266	291	316	291	282	316	292	288	2696
Acbd5	ENSMUSG00000026781,17	0.0825797	6.74414	0.666091	0.537563	0.96692	-8.31173	0.0926632	6.72039	0.780578	0.473405	0.693291	-7.79883	0.00674585	6.78296	0.0698274	0.947235	0.967851	-8.38375	3023	3853	3863	3603	3689	4078	3850	3405	3133	32497
Acbd6	ENSMUSG00000033701,13	0.00259051	5.0618	0.0412888	0.968812	0.998181	-8.3925	-0.0289848	5.01789	-0.396538	0.709486	0.863906	-7.89968	-0.0351084	5.0395	-0.559806	0.601511	0.752934	-7.98187	1195	1142	1085	1242	1133	1069	1113	1006	936	9921
Accs	ENSMUSG00000040272,14	-0.072793	2.41569	-0.561687	0.600812	0.96692	-7.83913	-0.0554249	2.39735	-0.382827	0.718948	0.869248	-7.55442	0.013517	2.38046	0.118261	0.9108	0.945112	-7.6863	179	216	168	204	168	164	144	181	167	1591
Acd	ENSMUSG00000038000,10	0.0674204	4.06562	1.34785	0.240803	0.96692	-7.34629	0.0413067	4.02397	0.849149	0.437879	0.692601	-7.48015	-0.0294019	4.07861	-0.804865	0.460001	0.64434	-7.65834	518	574	585	595	601	567	529	558	483	5010
Ace	ENSMUSG00000020681,14	0.157933	4.08356	1.28162	0.261288	0.96692	-7.42533	0.0547595	4.00246	0.218839	0.83618	0.933868	-7.8559	-0.105115	4.10129	-0.469408	0.65997	0.796324	-7.89892	626	538	489	692	570	585	484	735	387	5106
Acer2	ENSMUSG00000038007,14	0.238556	3.32043	1.82354	0.133461	0.96692	-6.65483	0.268535	3.30654	1.38058	0.230915	0.443346	-6.82386	0.027445	3.44556	0.125344	0.905491	0.942173	-7.90809	291	324	328	461	324	343	329	462	266	3128
Acer3	ENSMUSG00000030760,14	0.0790349	4.62855	0.519552	0.627598	0.96692	-8.18521	0.0728079	4.59707	0.50437	0.637293	0.820427	-7.80068	-0.00988416	4.65786	-0.145886	0.890126	0.936648	-8.10032	661	866	968	887	805	928	831	780	750	7476
Ache	ENSMUSG00000023328,14	0.052337	6.61972	0.69791	0.51921	0.96692	-8.27508	-0.0936571	6.5179	-1.20312	0.287356	0.515917	-7.36421	-0.149244	6.56515	-1.41155	0.221394	0.39843	-7.3532	3237	3228	3432	3303	3290	3730	3193	2784	2497	28694
Acin1	ENSMUSG00000022185,19	-0.193557	6.54974	-0.971819	0.379839	0.96692	-8.02681	-0.254591	6.49145	-1.25725	0.268905	0.489747	-7.3008	-0.0647112	6.41459	-0.931865	0.39724	0.594649	-7.85836	4474	3071	2921	3327	2846	2859	2809	2502	2528	27337
Ackr1	ENSMUSG00000037872,5	0.24842	4.00846	1.81232	0.135325	0.96692	-6.7634	-0.000928123	3.85668	-0.0050918	0.996151	0.998004	-7.86693	-0.25381	4.0013	-1.89408	0.121137	0.245155	-6.3995	425	599	503	667	572	569	514	392	479	4720
Ackr3	ENSMUSG00000044337,5	-0.0951892	3.45339	-0.350632	0.741479	0.96692	-8.12197	0.238967	3.5924	0.567779	0.596852	0.793686	-7.64347	0.331493	3.5634	0.777056	0.474797	0.64434	-7.59443	495	316	370	497	341	281	280	729	348	3657
Acly	ENSMUSG00000020917,17	0.056887	8.57621	1.20837	0.28583	0.96692	-7.97911	-0.0472634	8.49624	-0.452855	0.671271	0.842593	-8.16509	-0.108243	8.54548	-1.08392	0.331404	0.522124	-7.95401	12048	13492	12849	13508	13377	13173	11810	10135	11927	112319
Aco1	ENSMUSG00000028405,9	0.130894	5.39147	2.15161	0.0893946	0.96692	-6.48253	0.0155518	5.30601	0.212296	0.840989	0.933868	-7.9942	-0.119206	5.39204	-1.92023	0.117271	0.238679	-6.56481	1263	1453	1401	1623	1414	1488	1199	1293	1291	12425
Aco2	ENSMUSG00000022477,13	0.00515535	8.2485	0.074382	0.943859	0.987884	-8.71606	-0.00351091	8.21589	-0.0475525	0.964074	0.982908	-8.26492	-0.0120617	8.23899	-0.386146	0.716429	0.83609	-8.46721	11300	9771	10104	10954	10412	9999	9922	9655	8694	90811
Acot1	ENSMUSG00000072949,6	-0.00823405	3.27449	-0.0651374	0.950823	0.992345	-8.16699	-0.0144189	3.24463	-0.125434	0.905492	0.953772	-7.77396	-0.0106071	3.26055	-0.0742651	0.943889	0.965694	-7.87877	307	318	372	402	308	291	264	323	312	2897
Acot11	ENSMUSG00000034853,16	0.0119946	3.04843	0.0999189	0.924652	0.976029	-8.12843	-0.000538316	3.01288	-0.00419378	0.99683	0.998465	-7.74763	-0.015422	3.04083	-0.114358	0.913728	0.945964	-7.82998	265	260	321	259	303	294	226	298	247	2473
Acot13	ENSMUSG00000006717,7	-0.0310502	5.09043	-0.218014	0.836837	0.96692	-8.36787	0.00349323	5.07876	0.0204271	0.984561	0.993024	-7.99947	0.0317447	5.08362	0.32051	0.762487	0.87153	-8.11036	1424	1071	1067	1186	1183	1099	1178	1181	883	10272
Acot2	ENSMUSG00000021226,7	0.0710713	2.79127	1.19566	0.290298	0.96692	-7.33444	-0.0377691	2.70815	-0.510253	0.633475	0.817811	-7.54306	-0.111995	2.76389	-1.21949	0.280911	0.460961	-6.9966	226	230	235	272	221	238	218	223	174	2037
Acot6	ENSMUSG00000043487,4	0.000225443	2.80645	0.00150519	0.998863	0.999313	-8.09446	-0.0846598	2.7355	-0.657223	0.542586	0.754502	-7.45062	-0.088212	2.75682	-1.08453	0.33116	0.521859	-7.14181	196	271	255	244	215	262	207	214	193	2057
Acot7	ENSMUSG00000028937,14	-0.0476572	8.42935	-0.266464	0.801509	0.96692	-8.69404	-0.0587343	8.39583	-0.291669	0.783271	0.909874	-8.22845	-0.0147065	8.39224	-0.139622	0.894805	0.939466	-8.5616	15276	10718	10491	12196	11887	10839	11984	9477	10067	102935
Acot8	ENSMUSG00000017307,16	-0.0217493	2.3748	-0.171435	0.871228	0.96692	-7.99958	-0.0656623	2.32331	-0.482815	0.651391	0.830641	-7.49052	-0.0470136	2.33348	-0.349346	0.742097	0.855531	-7.61074	200	162	174	168	197	165	182	151	134	1533
Acot9	ENSMUSG00000025287,15	0.106441	5.62375	0.95079	0.389352	0.96692	-7.95133	0.136861	5.6101	1.21269	0.284013	0.511304	-7.27381	0.0273088	5.68444	0.366413	0.730141	0.846512	-8.17025	1401	1821	1674	1692	1781	1793	1764	1682	1439	15047
Acox1	ENSMUSG00000020777,16	0.11562	6.99281	1.49751	0.200032	0.96692	-7.48347	0.0358306	6.92477	0.455722	0.669355	0.841196	-8.0404	-0.0835266	7.00345	-2.35814	0.0688028	0.201968	-6.1928	3693	4448	4443	4695	4370	4582	3946	3899	3851	37927
Acox3	ENSMUSG00000029098,17	0.149215	4.49269	2.12363	0.0924642	0.96692	-6.41929	0.0479517	4.41415	0.759506	0.484746	0.703577	-7.60126	-0.104947	4.509	-2.7233	0.0449525	0.201968	-5.40206	739	772	682	887	785	770	707	693	660	6695
Acp1	ENSMUSG00000044573,16	0.0800588	4.36988	0.763097	0.483	0.96692	-7.98096	0.0515569	4.32724	0.484031	0.650591	0.830083	-7.78315	-0.0319188	4.38823	-1.13566	0.310165	0.497132	-7.384	581	750	742	752	704	731	641	692	611	6204
Acp2	ENSMUSG00000002103,15	0.052415	6.40177	1.24253	0.27413	0.96692	-7.72452	-0.0258799	6.33454	-0.398587	0.708077	0.862929	-8.01895	-0.0820912	6.38154	-1.45863	0.208752	0.387674	-7.27406	2640	2927	2951	3058	2855	2949	2691	2423	2497	24991
Acp5	ENSMUSG00000001348,15	-0.840315	0.539985	-1.04884	0.346645	0.96692	-7.0278	-0.0202719	0.919419	-0.0282136	0.978678	0.990964	-7.35287	0.815124	0.527381	2.0876	0.095416	0.201968	-5.38994	58	29	167	26	57	34	43	68	71	553
Acp6	ENSMUSG00000028093,15	-0.083716	1.96525	-0.945846	0.391616	0.96692	-7.44098	-0.214122	1.87302	-0.899759	0.413013	0.668384	-7.09068	-0.134315	1.85182	-0.579044	0.589483	0.7448	-7.37529	123	137	152	142	131	117	77	135	119	1133
Acpp	ENSMUSG00000032561,15	0.0913702	7.67635	0.569218	0.596098	0.96692	-8.47245	0.112265	7.65818	0.61971	0.564937	0.772974	-7.99889	0.0173012	7.72515	0.118167	0.910871	0.945139	-8.48952	5574	7988	6959	6686	7742	7344	7913	5924	6289	62419
Acrbp	ENSMUSG00000072770,9	-0.246605	1.36842	-0.899578	0.413339	0.96692	-7.36143	-0.261949	1.33431	-0.955853	0.386789	0.642729	-6.93103	-0.0198217	1.22934	-0.151191	0.886166	0.934278	-7.40853	137	80	80	96	71	77	80	66	72	759
Acsbg1	ENSMUSG00000032281,11	0.224783	4.97593	4.17764	0.0105806	0.96692	-4.01325	0.0656532	4.86854	0.878629	0.423255	0.67712	-7.54505	-0.163148	5.00172	-1.9002	0.120221	0.243594	-6.53892	957	1025	1001	1188	1094	1221	933	909	1001	9329
Acsf2	ENSMUSG00000076435,3	0.0347545	1.99987	0.348065	0.743281	0.96692	-7.87241	-0.0504881	1.92974	-0.342965	0.746785	0.888559	-7.48476	-0.0888067	1.96704	-0.51533	0.629883	0.773666	-7.44234	131	131	142	160	140	118	98	145	116	1181
Acsf3	ENSMUSG00000015016,8	0.111819	3.63432	1.36276	0.236409	0.96692	-7.27232	-0.00251504	3.54891	-0.0294344	0.977756	0.99035	-7.8264	-0.118045	3.62558	-1.78831	0.138185	0.274058	-6.47355	444	395	386	434	439	454	389	356	366	3663
Acsl1	ENSMUSG00000018796,13	0.0337181	5.62556	0.709531	0.512617	0.96692	-8.1631	0.074875	5.61775	1.5472	0.187696	0.384479	-6.87882	0.0378152	5.65528	0.630064	0.558321	0.718798	-8.01561	1602	1666	1734	1805	1766	1576	1570	1760	1472	14951
Acsl3	ENSMUSG00000032883,15	-0.0248749	6.30482	-0.191451	0.856404	0.96692	-8.50262	-0.00591039	6.28584	-0.0480305	0.963713	0.982823	-8.10839	0.0153308	6.29462	0.163679	0.876861	0.929898	-8.3109	2317	3081	2827	2547	2659	2870	2653	2338	2422	23714
Acsl4	ENSMUSG00000031278,12	-0.0616633	6.75159	-0.296553	0.779838	0.96692	-8.51745	-0.0130427	6.74761	-0.0569149	0.957009	0.97928	-8.14721	0.0445423	6.73829	0.276777	0.793835	0.893014	-8.33522	2809	4368	4325	3409	3466	4012	3898	2884	3469	32640
Acsl5	ENSMUSG00000024981,6	-0.109397	5.54919	-1.84551	0.129891	0.96692	-6.89614	-0.0408937	5.55518	-0.553425	0.605868	0.799968	-7.86425	0.0648278	5.5214	1.10553	0.32285	0.512079	-7.57096	1517	1749	1726	1554	1543	1541	1578	1411	1423	14042
Acsl6	ENSMUSG00000020333,17	-0.018456	6.30559	-0.335128	0.752393	0.96692	-8.45733	-0.0402279	6.26626	-0.363566	0.732339	0.878681	-8.02876	-0.0254357	6.27805	-0.204945	0.846286	0.916155	-8.29962	2679	2675	2803	2615	2651	2826	2826	2163	2276	23514
Acss1	ENSMUSG00000027452,11	0.083811	3.74405	1.3408	0.24291	0.96692	-7.31311	-0.0634917	3.64209	-0.819282	0.453093	0.692601	-7.45834	-0.150863	3.70495	-2.94237	0.0351646	0.201968	-4.99972	424	418	494	491	478	450	367	422	373	3917
Acss2	ENSMUSG00000027605,18	0.0202703	5.29158	0.26906	0.799631	0.96692	-8.37474	0.00746034	5.25683	0.0973839	0.926534	0.962874	-8.01104	-0.0164114	5.28797	-0.336372	0.751242	0.862711	-8.1313	1187	1418	1391	1347	1344	1367	1280	1193	1173	11700
Acta1	ENSMUSG00000031972,5	-1.65036	6.03588	-1.74378	0.147306	0.96692	-7.06886	0.740043	7.20105	0.582833	0.587487	0.790074	-7.98642	2.3879	6.39869	1.95646	0.112127	0.231153	-6.62196	4212	1408	10508	1209	2313	735	1662	21601	6097	49745
Acta2	ENSMUSG00000035783,9	-0.305468	3.6473	-1.13516	0.312447	0.96692	-7.53106	0.690737	4.11719	1.54932	0.187201	0.383624	-6.72258	0.993645	3.9833	2.13534	0.0900096	0.201968	-6.07558	586	377	488	534	359	299	480	1284	550	4957
Actb	ENSMUSG00000029580,14	0.130831	9.77984	1.07422	0.336267	0.96692	-8.23863	-0.137657	9.61825	-1.28071	0.261256	0.479708	-7.51305	-0.272437	9.70376	-2.35235	0.0692792	0.201968	-6.49928	26600	32186	27642	37438	29424	28470	22557	23587	25177	253081
Actc1	ENSMUSG00000068614,7	-1.842	4.12848	-1.95234	0.1139	0.96692	-6.57509	0.563162	5.30273	0.44542	0.676255	0.845216	-7.90238	2.40224	4.40254	1.76054	0.14306	0.282068	-6.58748	1178	451	2720	411	570	135	399	5922	1485	13271
Actg1	ENSMUSG00000062825,15	-0.00369673	8.58574	-0.0455443	0.9656	0.998181	-8.75082	0.0649019	8.59155	0.8473	0.438809	0.692601	-7.88832	0.0652941	8.61043	1.18508	0.293027	0.476474	-7.8522	14004	13288	12195	12873	13461	13154	13352	12579	11629	116535
Actg2	ENSMUSG00000059430,14	-0.274115	0.684051	-0.593942	0.580787	0.96692	-7.45936	0.814666	1.20184	1.41647	0.220857	0.436614	-6.39718	1.08707	1.07916	1.64485	0.165339	0.319097	-6.08318	84	47	55	93	38	34	61	203	71	686
Actl6a	ENSMUSG00000027671,14	0.0825312	4.01583	1.27411	0.263712	0.96692	-7.42562	0.0119618	3.953	0.163821	0.876846	0.944584	-7.86257	-0.0747013	4.0149	-1.07225	0.336101	0.527667	-7.39247	493	543	577	621	528	566	484	485	509	4806
Actl6b	ENSMUSG00000029712,14	-0.0523186	5.20116	-0.46924	0.660476	0.96692	-8.27766	-0.105966	5.14625	-0.703757	0.515701	0.731674	-7.71994	-0.0575019	5.14074	-0.489454	0.646739	0.786854	-8.03771	1464	1217	1175	1215	1251	1250	1224	953	1084	10833
Actn1	ENSMUSG00000015143,15	-0.0144902	5.54658	-0.142972	0.892414	0.96692	-8.43335	-0.0135904	5.51865	-0.116672	0.912056	0.955836	-8.03303	-0.00225733	5.53156	-0.0254031	0.980788	0.989723	-8.23057	1801	1499	1531	1788	1509	1501	1568	1561	1232	13990
Actn2	ENSMUSG00000052374,16	-1.62832	2.99463	-1.70441	0.154677	0.96692	-6.72701	0.382073	3.97181	0.278364	0.792847	0.915507	-7.83403	2.008	3.1781	1.44387	0.212639	0.391996	-6.77028	491	168	1325	227	156	105	140	2453	530	5595
Actn3	ENSMUSG00000006457,4	-0.503604	1.67529	-1.54628	0.188265	0.96692	-6.70664	0.409304	2.10037	0.98431	0.374018	0.629248	-7.05331	0.91094	1.87113	2.56574	0.0538851	0.201968	-5.08685	167	85	152	80	89	108	111	244	140	1176
Actn4	ENSMUSG00000054808,15	-0.001643	7.60304	-0.0159462	0.987951	0.998181	-8.65587	-0.0421419	7.5548	-0.428682	0.687543	0.851043	-8.10543	-0.0440961	7.57428	-0.794408	0.465568	0.64434	-8.12107	7515	6146	6358	7275	6649	6113	6209	5846	5575	57686
Actr10	ENSMUSG00000021076,6	0.107954	6.64231	0.643796	0.550684	0.96692	-8.31763	0.157093	6.63819	0.997643	0.368157	0.62263	-7.59191	0.0456466	6.71358	0.641668	0.551386	0.712924	-8.13881	2572	3654	3772	3402	3512	3770	3533	3349	3130	30694
Actr1a	ENSMUSG00000025228,5	0.0993771	8.35147	3.69369	0.0166206	0.96692	-4.88358	0.021355	8.28435	0.490555	0.646309	0.827051	-8.12871	-0.0817614	8.35476	-1.91667	0.11779	0.23963	-6.92522	10513	11069	10763	11864	11582	11344	10179	9756	9931	97001
Actr1b	ENSMUSG00000037351,9	-0.00836912	7.96358	-0.0800254	0.93961	0.985231	-8.68766	-0.0233312	7.92798	-0.20626	0.845431	0.933868	-8.21851	-0.0185394	7.94427	-0.332811	0.75376	0.864591	-8.45658	9737	8220	7817	8727	8672	8215	8176	7373	7439	74376
Actr2	ENSMUSG00000020152,7	0.106631	8.0235	0.527558	0.622455	0.96692	-8.53274	0.0957836	7.98932	0.506936	0.635626	0.819501	-8.09687	-0.0144638	8.0642	-0.170931	0.871468	0.926943	-8.51898	6399	9650	10160	8670	9220	9951	8801	8293	7908	79052
Actr3	ENSMUSG00000026341,16	0.0478408	7.49732	0.571019	0.594974	0.96692	-8.45355	0.0330987	7.46142	0.446482	0.675541	0.8448	-8.08894	-0.0183248	7.5065	-0.275262	0.79493	0.89372	-8.42695	5439	6325	6496	6060	6431	6423	5999	5547	5419	54139
Actr3b	ENSMUSG00000056367,14	0.10911	5.0826	2.54569	0.0561635	0.96692	-5.93964	0.066405	5.03316	1.09727	0.326786	0.568428	-7.345	-0.0464482	5.10846	-0.929486	0.398351	0.595974	-7.69421	1043	1166	1137	1247	1208	1166	1124	1025	1038	10154
Actr5	ENSMUSG00000037761,16	-0.223866	1.764	-2.58147	0.0539014	0.96692	-5.39896	-0.0247258	1.83602	-0.213725	0.839938	0.933868	-7.50978	0.195014	1.74456	1.44691	0.211832	0.391996	-6.50044	121	132	122	113	95	115	128	99	110	1035
Actr6	ENSMUSG00000019948,4	0.030818	4.16834	0.229873	0.828144	0.96692	-8.25858	0.02469	4.13583	0.178074	0.866263	0.939669	-7.88122	-0.00889067	4.1728	-0.078425	0.940754	0.963499	-8.03743	512	628	695	591	604	678	615	609	472	5404
Actr8	ENSMUSG00000015971,5	0.0921014	4.92429	2.66151	0.0492005	0.96692	-5.77466	-0.00274858	4.84885	-0.0576679	0.956441	0.979096	-7.97503	-0.0986148	4.91558	-2.13293	0.0902744	0.201968	-6.22388	1001	1026	986	1098	1087	1040	900	913	923	8974
Acvr1	ENSMUSG00000026836,15	0.160443	4.79735	2.30715	0.0742255	0.96692	-6.21559	0.137467	4.75732	1.61983	0.171455	0.355439	-6.70609	-0.0263299	4.85842	-0.548057	0.60893	0.758116	-7.9646	816	881	1007	1064	993	969	958	947	799	8434
Acvr1b	ENSMUSG00000000532,11	0.0787675	6.24251	1.76844	0.142874	0.96692	-7.06734	0.0191501	6.18458	0.315749	0.766055	0.901242	-8.04098	-0.0633853	6.24475	-0.974543	0.377743	0.575442	-7.79611	2377	2560	2618	2746	2748	2518	2486	2217	2266	22536
Acvr2a	ENSMUSG00000052155,5	0.154502	6.59835	0.566643	0.597707	0.96692	-8.36578	0.102665	6.54367	0.398137	0.708386	0.863211	-8.03717	-0.0555726	6.64283	-0.442126	0.678209	0.809115	-8.25339	2130	3684	3924	3168	3462	3938	3302	2901	3004	29513
Acvr2b	ENSMUSG00000061393,14	-0.0230142	2.05773	-0.20203	0.848596	0.96692	-7.93186	-0.18853	1.94665	-1.68764	0.157572	0.329519	-6.21307	-0.168686	1.95546	-1.33733	0.242827	0.422016	-6.6788	128	153	149	158	121	147	106	134	104	1200
Acvrl1	ENSMUSG00000000530,16	0.318323	3.66485	1.97849	0.110311	0.96692	-6.50362	0.287828	3.62209	1.65861	0.16337	0.34037	-6.52683	-0.0339727	3.80058	-0.151749	0.88575	0.9341	-7.96674	392	397	375	630	411	440	357	557	401	3960
Acy1	ENSMUSG00000023262,13	0.0910985	2.35941	0.694076	0.521397	0.96692	-7.73551	-0.0407608	2.26631	-0.451435	0.672222	0.843347	-7.49722	-0.135791	2.331	-1.22462	0.279145	0.458986	-6.89487	188	162	160	219	167	162	145	162	143	1508
Acy3	ENSMUSG00000024866,10	0.183908	1.13573	1.07654	0.335332	0.96692	-7.13697	-0.000593755	1.01451	-0.00218853	0.998346	0.999174	-7.37296	-0.186786	1.12514	-0.655764	0.543039	0.705408	-7.14668	78	62	71	102	73	68	53	96	50	653
Acyp1	ENSMUSG00000008822,15	-0.176834	2.89915	-1.94265	0.115261	0.96692	-6.43538	0.0786701	2.99821	0.832641	0.446239	0.692601	-7.35298	0.252331	2.93004	2.59409	0.0521417	0.201968	-5.2936	290	251	272	263	213	247	283	277	223	2319
Acyp2	ENSMUSG00000060923,5	-0.229753	3.90189	-1.42771	0.218138	0.96692	-7.23033	-0.0476323	3.96369	-0.298701	0.778229	0.908059	-7.82626	0.179254	3.86964	1.35058	0.238862	0.416325	-7.05902	654	480	537	463	428	534	555	503	410	4564
Ada	ENSMUSG00000017697,3	-0.0263393	1.42937	-0.10611	0.920004	0.973297	-7.82165	0.0820581	1.45465	0.327766	0.757522	0.895554	-7.39821	0.105169	1.46121	1.62135	0.170277	0.327137	-6.21821	130	82	74	90	94	89	97	89	81	826
Adal	ENSMUSG00000027259,15	0.0625695	3.96806	0.431953	0.685435	0.96692	-8.15419	0.0618483	3.93952	0.444586	0.676815	0.845543	-7.75954	-0.00451776	3.99219	-0.0523861	0.960397	0.976487	-8.01092	426	584	573	531	527	589	504	479	507	4720
Adam10	ENSMUSG00000054693,14	0.181016	7.21013	1.07168	0.337292	0.96692	-7.99247	0.146281	7.16431	0.907998	0.409073	0.665028	-7.72235	-0.0382007	7.27588	-0.59234	0.581258	0.738662	-8.24008	3700	5224	5541	5673	4903	5687	4901	5088	4385	45102
Adam11	ENSMUSG00000020926,16	-0.0726784	7.06982	-0.827899	0.448882	0.96692	-8.21356	-0.119278	7.01884	-0.680759	0.528871	0.742918	-7.90297	-0.0507995	7.00301	-0.326332	0.758351	0.86818	-8.34914	5167	4696	4297	4573	4497	4408	4519	3240	4189	39586
Adam12	ENSMUSG00000054555,11	-0.0466199	4.90792	-0.182975	0.862674	0.96692	-8.35623	0.0777939	4.94181	0.232341	0.826285	0.933868	-7.95373	0.121799	4.93778	0.369178	0.728213	0.845097	-8.07084	1333	861	988	1333	982	791	791	1562	807	9448
Adam15	ENSMUSG00000028041,17	0.0573142	5.26718	0.936616	0.395874	0.96692	-7.92695	0.0528365	5.23701	0.476307	0.655683	0.833261	-7.88023	-0.00805214	5.28603	-0.0824978	0.937685	0.961527	-8.1948	1337	1321	1214	1445	1279	1321	1071	1365	1232	11585
Adam17	ENSMUSG00000052593,16	0.16288	5.53171	1.17039	0.299371	0.96692	-7.71421	0.0516723	5.44819	0.33314	0.753718	0.893093	-7.96809	-0.114905	5.55032	-0.849628	0.4371	0.631883	-7.82574	1257	1544	1715	1894	1457	1713	1224	1630	1400	13834
Adam19	ENSMUSG00000011256,16	0.0848906	7.09792	1.38298	0.230569	0.96692	-7.6322	-0.00801473	7.02357	-0.0739722	0.94415	0.972814	-8.16881	-0.0969739	7.08687	-0.9908	0.370527	0.568321	-7.88216	4163	4850	4644	4892	4740	4886	4347	3709	4314	40545
Adam22	ENSMUSG00000040537,17	-0.0353569	6.99604	-0.330913	0.755373	0.96692	-8.52933	-0.0430253	6.96386	-0.286013	0.787336	0.912436	-8.11783	-0.0115125	6.96735	-0.0937918	0.929183	0.955882	-8.40353	3761	4702	4858	4243	4316	4420	4555	3455	3763	38073
Adam23	ENSMUSG00000025964,15	0.0820556	7.64599	1.92179	0.11825	0.96692	-7.0116	-0.0212266	7.56623	-0.275883	0.794637	0.916316	-8.17008	-0.107027	7.62793	-1.22799	0.277989	0.457781	-7.69343	6654	6499	6801	7425	6561	7246	6661	5574	5707	59128
Adam33	ENSMUSG00000027318,17	-0.204437	1.57655	-0.594637	0.580359	0.96692	-7.65156	0.266138	1.78392	0.768146	0.480071	0.699179	-7.19039	0.467786	1.69961	1.44226	0.213067	0.391996	-6.49373	156	84	99	121	106	66	95	172	103	1002
Adam9	ENSMUSG00000031555,15	0.0761318	6.26153	1.14651	0.30818	0.96692	-7.81655	0.0527788	6.22165	0.787806	0.469561	0.692601	-7.75007	-0.0270489	6.28059	-1.37195	0.230757	0.404997	-7.36654	2324	2514	2844	2838	2603	2669	2464	2446	2318	23020
Adamts1	ENSMUSG00000022893,14	0.153097	4.43583	0.908123	0.409255	0.96692	-7.86068	-0.0128035	4.32429	-0.0519396	0.960763	0.981416	-7.9201	-0.168748	4.4209	-0.760662	0.48364	0.650827	-7.74712	839	601	683	878	825	660	515	873	559	6433
Adamts10	ENSMUSG00000024299,17	-0.121864	4.74369	-0.548788	0.608937	0.96692	-8.18037	-0.0777228	4.73845	-0.392099	0.712543	0.865786	-7.87371	0.0403247	4.69689	0.31449	0.766773	0.874448	-8.05944	1220	912	783	1055	874	738	768	881	823	8054
Adamts12	ENSMUSG00000047497,10	0.082183	5.18312	0.542852	0.612699	0.96692	-8.23272	-0.0232814	5.10222	-0.0711978	0.946241	0.973864	-7.99889	-0.10823	5.16304	-0.312784	0.767989	0.875421	-8.12359	1274	1120	1231	1628	1197	1078	756	1747	950	10981
Adamts14	ENSMUSG00000059901,12	-0.00775152	1.76235	-0.0506006	0.961785	0.998181	-7.8961	0.088999	1.78352	0.474876	0.656628	0.833946	-7.39385	0.0928685	1.79926	0.77176	0.477641	0.645101	-7.22057	141	109	101	124	107	116	96	123	119	1036
Adamts15	ENSMUSG00000033453,8	-0.000303843	5.62537	-0.0047473	0.996413	0.998181	-8.45408	-0.0994252	5.54813	-1.0667	0.339032	0.584436	-7.42557	-0.103248	5.56873	-1.17839	0.295436	0.479689	-7.49791	1540	1757	1771	1781	1578	1725	1403	1368	1532	14455
Adamts16	ENSMUSG00000049538,14	-0.44759	1.75076	-0.846208	0.439584	0.96692	-7.48759	0.0808973	1.98506	0.0855378	0.935442	0.968047	-7.56178	0.528783	1.77615	0.567179	0.596884	0.749542	-7.36386	247	101	97	159	82	72	54	448	86	1346
Adamts17	ENSMUSG00000058145,16	0.249538	6.00207	3.07824	0.0310974	0.96692	-5.37048	-0.0171711	5.84128	-0.123324	0.907072	0.954549	-8.06137	-0.271208	5.98686	-2.30564	0.073258	0.201968	-6.13677	1782	2013	2255	2573	2286	2340	1842	1604	1996	18691
Adamts19	ENSMUSG00000053441,5	-0.0874133	2.26724	-0.879053	0.423281	0.96692	-7.56231	0.0891664	2.32674	1.63274	0.168453	0.349791	-6.35344	0.173061	2.30435	1.64262	0.1658	0.31981	-6.3884	174	163	170	151	180	150	175	159	157	1479
Adamts2	ENSMUSG00000036545,8	0.146689	4.61082	0.609756	0.571125	0.96692	-8.12509	0.280894	4.64956	0.707951	0.513325	0.729458	-7.66735	0.131591	4.74236	0.359273	0.735133	0.850402	-8.04801	1036	643	750	1104	854	724	608	1463	754	7936
Adamts20	ENSMUSG00000022449,14	0.37392	4.7167	2.06468	0.099309	0.96692	-6.52097	0.0150193	4.51038	0.0853353	0.935595	0.968114	-7.93766	-0.36345	4.71766	-1.94203	0.114147	0.234662	-6.4442	712	718	960	1284	858	980	614	779	800	7705
Adamts3	ENSMUSG00000043635,12	-0.0102804	5.48107	-0.130748	0.901546	0.96692	-8.4284	-0.169281	5.3739	-1.12589	0.315676	0.554755	-7.34673	-0.163166	5.3892	-1.04344	0.347953	0.541904	-7.61821	1621	1473	1503	1627	1598	1366	1466	1042	1245	12941
Adamts4	ENSMUSG00000006403,13	0.192584	1.3833	0.819015	0.453448	0.96692	-7.43734	0.0634243	1.29181	0.263328	0.803718	0.92063	-7.38813	-0.133467	1.4084	-0.687624	0.524488	0.688694	-7.19252	90	62	102	111	102	76	65	92	82	782
Adamts5	ENSMUSG00000022894,6	0.148082	6.8967	1.12869	0.314904	0.96692	-7.90053	0.102326	6.84522	0.819968	0.452739	0.692601	-7.7756	-0.0490865	6.94029	-0.628122	0.559487	0.719835	-8.17559	3216	4273	4203	4372	3956	4605	4081	3886	3391	35983
Adamts7	ENSMUSG00000032363,15	0.0283102	4.68049	0.376723	0.723271	0.96692	-8.26581	-0.114703	4.58183	-1.09887	0.326156	0.567636	-7.29751	-0.147385	4.61613	-1.28116	0.260339	0.436623	-7.25362	893	878	832	1004	812	857	759	658	776	7469
Adamts9	ENSMUSG00000030022,14	0.139121	5.88959	0.886963	0.419427	0.96692	-8.03951	-0.0193668	5.78198	-0.14158	0.89342	0.952322	-8.05313	-0.161638	5.87205	-0.823976	0.450154	0.637504	-7.88928	1800	1921	2078	2420	1680	2387	1542	2158	1559	17545
Adamtsl1	ENSMUSG00000066113,16	-0.0386861	1.58313	-0.121708	0.908311	0.96692	-7.85167	0.461709	1.80332	0.840996	0.441992	0.692601	-7.1308	0.499814	1.80093	0.855993	0.433906	0.630686	-7.14628	131	93	91	144	104	68	89	282	85	1087
Adamtsl2	ENSMUSG00000036040,14	0.178281	2.09819	1.38279	0.230621	0.96692	-6.992	0.25545	2.10894	2.8847	0.0380933	0.129487	-4.71214	0.0733338	2.21886	0.726901	0.502228	0.66885	-7.35474	119	145	149	169	133	168	156	148	143	1330
Adamtsl3	ENSMUSG00000070469,12	-0.230161	3.53043	-5.10955	0.00485238	0.831074	-2.92031	0.0930384	3.66292	0.5894	0.58343	0.78676	-7.63864	0.320663	3.56828	2.11907	0.0918142	0.201968	-6.0341	448	414	420	387	356	354	376	535	352	3642
Adamtsl4	ENSMUSG00000015850,11	-0.165858	2.34926	-0.637225	0.554592	0.96692	-7.77532	0.194231	2.49998	0.423257	0.691222	0.852688	-7.55402	0.358534	2.43536	0.789312	0.468265	0.64434	-7.35217	241	162	160	206	172	125	128	359	151	1704
Adamtsl5	ENSMUSG00000043822,18	0.113809	2.78731	0.525428	0.623821	0.96692	-7.92775	0.0399346	2.72408	0.119173	0.910182	0.95571	-7.69133	-0.0780016	2.79974	-0.212146	0.84098	0.916155	-7.75978	253	198	232	332	232	192	136	309	226	2110
Adap1	ENSMUSG00000056413,16	-0.00695951	7.51247	-0.0449334	0.966061	0.998181	-8.64579	-0.0632053	7.45627	-0.413452	0.697897	0.856845	-8.10506	-0.0598279	7.47315	-0.781339	0.472507	0.64434	-8.1203	7617	5716	5617	6433	6631	5711	5824	5244	5281	54074
Adar	ENSMUSG00000027951,16	0.076199	5.80379	1.52343	0.19369	0.96692	-7.32973	0.0225499	5.74884	0.717859	0.507307	0.724098	-7.76569	-0.0572875	5.80758	-1.13048	0.313218	0.500824	-7.58066	1802	1910	1864	2049	2042	1818	1777	1716	1660	16638
Adarb1	ENSMUSG00000020262,15	-0.011823	6.01349	-0.303712	0.774714	0.96692	-8.43913	-0.0470697	5.96769	-0.693652	0.521459	0.736868	-7.80347	-0.0390848	5.98274	-0.532664	0.618733	0.765222	-8.12105	2144	2168	2338	2195	2238	2187	2080	1832	1949	19131
Adat1	ENSMUSG00000031949,17	0.0417604	2.81757	0.699815	0.518125	0.96692	-7.81301	-0.0497839	2.74481	-0.494635	0.643639	0.825269	-7.55838	-0.096028	2.78593	-0.886717	0.418748	0.616328	-7.34331	239	242	230	264	249	223	222	187	218	2074
Adat2	ENSMUSG00000019808,8	-0.135723	1.65095	-0.985666	0.37368	0.96692	-7.33851	0.0627422	1.72291	0.562286	0.600293	0.796303	-7.33007	0.194362	1.67524	1.42585	0.217477	0.392514	-6.50936	107	125	105	108	115	86	115	98	107	966
Adck1	ENSMUSG00000021044,15	0.119749	3.82182	1.36963	0.234407	0.96692	-7.28943	0.0665499	3.7668	2.06522	0.097189	0.216195	-6.01858	-0.0566385	3.84756	-0.686689	0.525026	0.689039	-7.71599	437	466	487	514	556	451	450	459	415	4235
Adck2	ENSMUSG00000046947,12	0.115775	3.67046	1.34493	0.241676	0.96692	-7.29823	0.0662268	3.61731	0.929579	0.398898	0.654171	-7.35488	-0.0528442	3.69582	-0.656713	0.54248	0.704987	-7.71228	394	449	411	470	487	409	382	438	375	3815
Adck5	ENSMUSG00000022550,18	0.0821969	2.297	0.967045	0.381981	0.96692	-7.48461	0.137748	2.29808	0.89662	0.414521	0.66981	-7.1745	0.0507558	2.35919	0.337102	0.750726	0.862315	-7.62198	176	158	155	187	177	156	184	137	172	1502
Adcy1	ENSMUSG00000020431,5	0.0745565	7.52849	0.917807	0.404667	0.96692	-8.17748	-0.00280113	7.46136	-0.0450473	0.965965	0.983712	-8.20644	-0.0808908	7.51953	-1.24704	0.271542	0.450301	-7.65938	6505	5680	6280	6371	6948	6200	5838	5580	5330	54732
Adcy2	ENSMUSG00000021536,7	0.120123	5.77125	3.15451	0.0286797	0.96692	-5.25419	0.0189818	5.69253	0.355602	0.737909	0.882596	-7.98132	-0.10484	5.77331	-1.94793	0.113317	0.233311	-6.57777	1817	1797	1754	1975	1907	1976	1732	1592	1627	16177
Adcy3	ENSMUSG00000020654,15	-0.0414185	4.49651	-0.442793	0.678129	0.96692	-8.2128	-0.120078	4.42891	-1.26969	0.264825	0.483968	-7.09285	-0.0820402	4.42848	-2.04978	0.0999453	0.208966	-6.26364	878	737	739	821	754	716	660	703	603	6611
Adcy4	ENSMUSG00000022220,14	0.163861	1.90992	1.46262	0.20889	0.96692	-6.85926	0.00409629	1.80278	0.0301319	0.977229	0.990039	-7.5305	-0.163307	1.90405	-1.01834	0.358569	0.554525	-7.01632	118	128	117	163	120	128	94	133	107	1108
Adcy5	ENSMUSG00000022840,9	0.0964145	6.31177	1.87007	0.126017	0.96692	-6.94393	0.0609768	6.26615	1.16598	0.300677	0.534541	-7.38372	-0.0392564	6.33487	-0.682021	0.527718	0.691593	-8.06282	2705	2599	2571	2972	2882	2608	2507	2454	2512	23810
Adcy6	ENSMUSG00000022994,9	0.0153456	4.71363	0.120626	0.909121	0.96692	-8.34586	-0.0207497	4.6682	-0.198425	0.851208	0.933868	-7.93476	-0.0399469	4.69575	-0.246996	0.815448	0.907158	-8.08169	873	873	930	1131	792	824	701	925	788	7837
Adcy7	ENSMUSG00000031659,13	0.185322	3.25501	0.909676	0.408517	0.96692	-7.70293	-0.0380531	3.11658	-0.169753	0.872438	0.942355	-7.74631	-0.227675	3.2291	-0.903054	0.41086	0.607729	-7.41837	287	270	368	456	282	329	208	340	281	2821
Adcy8	ENSMUSG00000022376,8	0.070532	3.49195	0.709543	0.51261	0.96692	-7.91055	0.224028	3.54031	2.11347	0.0932626	0.208003	-5.93074	0.149999	3.59624	1.90949	0.118844	0.241279	-6.31277	391	400	336	384	399	402	434	378	384	3508
Adcy9	ENSMUSG00000005580,11	0.0354967	4.21934	0.372902	0.725924	0.96692	-8.21336	-0.0116152	4.1674	-0.109543	0.917403	0.958152	-7.89677	-0.0505986	4.20562	-1.07456	0.335168	0.526541	-7.4202	712	590	590	665	642	632	615	563	525	5534
Adcyap1	ENSMUSG00000024256,7	0.088708	6.62236	0.328222	0.757277	0.96692	-8.49248	0.0961108	6.59688	0.410354	0.700013	0.858001	-8.03587	0.00404195	6.66319	0.0210096	0.98411	0.990805	-8.37195	2343	3850	3842	3018	3263	4306	3709	2975	2891	30197
Adcyap1r1	ENSMUSG00000029778,12	-0.148631	2.54467	-0.99992	0.367429	0.96692	-7.49788	-0.461651	2.36244	-1.39651	0.226398	0.442496	-6.64534	-0.31748	2.30769	-0.877462	0.423269	0.620129	-7.24342	210	200	219	232	151	194	84	187	169	1646
Add1	ENSMUSG00000029106,14	0.0805834	8.73822	2.80759	0.0417591	0.96692	-5.97751	0.028074	8.68376	0.557465	0.603322	0.798128	-8.11798	-0.0561484	8.74476	-1.11638	0.318631	0.507402	-7.94142	14074	14459	14028	15356	15113	14721	14033	12740	12744	127268
Add2	ENSMUSG00000030000,10	0.0779211	8.64271	1.37082	0.234064	0.96692	-7.79853	-0.0295659	8.56092	-0.30071	0.77679	0.907105	-8.23747	-0.111472	8.62076	-1.12597	0.314942	0.502832	-7.91757	12448	13967	13494	14005	14556	13707	12687	10714	12236	117814
Add3	ENSMUSG00000025026,15	0.0196207	7.19191	0.244321	0.817593	0.96692	-8.57885	0.0666117	7.18709	0.622602	0.563193	0.771394	-7.95912	0.0436805	7.21753	0.383063	0.718563	0.837611	-8.35096	4634	4890	5387	5551	4496	5155	4328	5597	4354	44392
Adgra1	ENSMUSG00000025475,17	-0.288419	3.602	-6.67302	0.00162531	0.45096	-1.63045	0.031605	3.73461	0.313447	0.767695	0.902237	-7.79247	0.315612	3.61098	2.76583	0.0428346	0.201968	-5.20564	451	456	467	398	387	346	459	379	445	3788
Adgra2	ENSMUSG00000031486,15	0.107552	5.2914	0.566039	0.598085	0.96692	-8.22975	0.124398	5.27207	0.472804	0.657998	0.834483	-7.8855	0.0136464	5.34538	0.0499853	0.96221	0.977743	-8.20526	1513	1152	1230	1780	1317	1152	973	1803	1188	12108
Adgra3	ENSMUSG00000029090,12	0.069285	5.74459	2.57469	0.0537681	0.96692	-5.9689	-0.0389837	5.66253	-0.64972	0.547009	0.758126	-7.80875	-0.112018	5.71775	-1.81367	0.133883	0.26738	-6.74471	1749	1815	1800	1999	1871	1785	1478	1670	1608	15775
Adgrb1	ENSMUSG00000034730,17	-0.100267	4.68717	-0.756757	0.486438	0.96692	-8.02296	-0.132315	4.64351	-0.842161	0.441403	0.692601	-7.55467	-0.0361276	4.61359	-0.352902	0.739599	0.853869	-8.03222	1082	823	849	919	857	787	833	681	762	7593
Adgrb2	ENSMUSG00000028782,14	-0.0291774	4.97963	-0.210572	0.842306	0.96692	-8.35758	-0.0916508	4.92042	-0.630493	0.558451	0.767507	-7.75209	-0.0663055	4.92629	-0.843471	0.440206	0.631883	-7.74863	1300	1003	989	1081	1125	1009	972	877	941	9297
Adgrb3	ENSMUSG00000033569,17	0.0490361	5.13842	0.412677	0.698527	0.96692	-8.30001	0.035649	5.10329	0.302835	0.775269	0.906543	-7.94689	-0.0169802	5.14893	-0.152849	0.884929	0.933643	-8.16657	1027	1294	1243	1203	1142	1350	1238	1032	1049	10578
Adgrd1	ENSMUSG00000044017,16	0.04792	4.12795	0.367014	0.730023	0.96692	-8.20468	0.0285185	4.09047	0.240175	0.82056	0.93036	-7.8603	-0.023132	4.13459	-0.201677	0.848696	0.916155	-8.01057	660	569	539	654	659	524	497	589	552	5243
Adgre1	ENSMUSG00000004730,15	-0.0595901	2.04152	-0.375931	0.723821	0.96692	-7.86864	0.250313	2.16884	0.784603	0.471261	0.692601	-7.2497	0.306771	2.15904	0.95831	0.385064	0.582821	-7.13594	125	138	170	170	126	122	107	233	149	1340
Adgre5	ENSMUSG00000002885,14	0.239819	3.87602	1.33735	0.243948	0.96692	-7.33417	0.070689	3.76429	0.37372	0.725265	0.873487	-7.77181	-0.173104	3.90433	-0.93644	0.395111	0.592897	-7.50987	376	499	523	684	489	488	366	524	447	4396
Adgrf5	ENSMUSG00000056492,6	0.37501	5.16753	1.65421	0.164627	0.96692	-7.09855	0.197155	5.05096	0.839788	0.442604	0.692601	-7.59799	-0.181432	5.25874	-0.913522	0.405868	0.602382	-7.72892	813	1268	1215	1752	1169	1348	939	1398	1083	10985
Adgrg1	ENSMUSG00000031785,16	0.230044	5.986	3.40273	0.0221825	0.96692	-4.98131	0.0393197	5.86256	0.346543	0.744267	0.886941	-8.00044	-0.194553	5.99838	-1.9353	0.115101	0.235569	-6.62225	1809	2130	2072	2440	2233	2394	2128	1694	1811	18711
Adgrg2	ENSMUSG00000031298,15	0.0675767	6.52943	1.33243	0.245432	0.96692	-7.63415	-0.0487853	6.44292	-0.569624	0.5957	0.793497	-7.93253	-0.120054	6.49766	-1.42868	0.216711	0.391996	-7.32443	2874	3107	3277	3265	3143	3325	3040	2540	2579	27150
Adgrg3	ENSMUSG00000060470,7	0.00602482	1.6595	0.103234	0.922163	0.97468	-7.87014	-0.297572	1.4802	-5.19453	0.00430878	0.129487	-2.10382	-0.307659	1.50354	-4.72807	0.00627444	0.201968	-2.55919	108	101	113	119	100	106	84	77	77	885
Adgrg6	ENSMUSG00000039116,7	0.37898	6.17291	2.03167	0.103378	0.96692	-6.71994	0.0707499	5.99084	0.407484	0.701976	0.85931	-7.98474	-0.31215	6.20134	-3.36712	0.0223286	0.201968	-4.83058	1659	2375	2559	3036	2461	3008	2014	2102	2082	21296
Adgrl1	ENSMUSG00000013033,16	0.0415072	7.69673	1.26793	0.26572	0.96692	-7.82599	-0.0934076	7.60121	-1.18373	0.294241	0.525862	-7.47463	-0.138691	7.64259	-1.82191	0.132515	0.264964	-6.96715	7185	6855	6922	7472	7228	6963	6551	5542	5823	60541
Adgrl2	ENSMUSG00000028184,12	0.0447874	5.97924	0.936502	0.395927	0.96692	-8.00238	-0.0279408	5.91426	-0.357051	0.736894	0.881933	-8.00061	-0.075792	5.95723	-0.923776	0.401027	0.598109	-7.8093	2160	2062	2144	2336	2029	2237	1894	2163	1652	18677
Adgrl3	ENSMUSG00000037605,16	0.0992323	6.22442	1.13525	0.312411	0.96692	-7.82488	-0.0353323	6.12868	-0.326119	0.758689	0.896399	-8.03209	-0.138194	6.19942	-1.43843	0.214089	0.391996	-7.27595	2189	2625	2612	2572	2668	2726	2470	2038	2087	21987
Adgrl4	ENSMUSG00000039167,12	0.524726	3.32715	1.46525	0.208209	0.96692	-7.10303	0.219746	3.14723	0.5812	0.588498	0.790387	-7.5707	-0.308509	3.43058	-1.40228	0.22397	0.402387	-6.91724	170	368	371	502	332	421	242	382	300	3088
Adgrv1	ENSMUSG00000069170,14	0.0358055	1.12325	0.218201	0.8367	0.96692	-7.73412	0.591919	1.37067	1.53631	0.190262	0.38894	-6.28854	0.554757	1.40816	1.56527	0.182671	0.347102	-6.27267	90	61	71	84	72	70	77	170	76	771
Adh1	ENSMUSG00000074207,10	-0.172537	0.905192	-0.327742	0.757617	0.96692	-7.65074	0.256774	1.09208	0.353622	0.739297	0.88358	-7.31407	0.427178	1.02251	0.678373	0.529829	0.693531	-7.1054	119	37	70	91	49	48	38	163	63	678
Adh5	ENSMUSG00000028138,8	0.100045	5.82067	5.49391	0.00321748	0.686709	-2.75042	0.121688	5.80326	2.62404	0.0510529	0.129487	-5.51067	0.01817	5.87393	0.424566	0.690085	0.817309	-8.16727	1806	1889	1900	2109	1977	1937	1767	2010	1769	17164
Adhfe1	ENSMUSG00000025911,14	0.0424154	0.830819	0.10492	0.920897	0.973899	-7.69279	0.0466189	0.802796	0.083357	0.937083	0.96898	-7.32515	0.00379827	0.839115	0.00618754	0.99532	0.997046	-7.32703	80	54	49	102	56	40	43	123	32	579
Adi1	ENSMUSG00000020629,12	-0.159592	2.96502	-3.67015	0.0169523	0.96692	-4.30456	0.0528901	3.0423	0.432488	0.684968	0.849068	-7.64097	0.209718	2.98309	1.71327	0.151769	0.296589	-6.44662	273	274	298	273	236	251	247	327	231	2410
Adipor1	ENSMUSG00000026457,14	-0.00666632	6.54954	-0.141715	0.893353	0.96692	-8.53775	0.0531922	6.55098	0.957025	0.386256	0.642123	-7.62449	0.0564545	6.56858	1.709	0.152581	0.297967	-6.98477	2990	3177	3470	3266	3163	3188	2989	3276	2830	28349
Adipor2	ENSMUSG00000030168,13	0.0365507	6.09524	1.64511	0.165111	0.96692	-7.208	0.0172376	6.05752	0.418591	0.694395	0.854815	-7.98523	-0.0229755	6.09643	-0.503508	0.637553	0.780186	-8.15261	2262	2305	2351	2500	2377	2252	2030	2239	2105	20421
Adk	ENSMUSG00000039197,10	-0.0121491	5.27453	-0.0869101	0.93443	0.981968	-8.41207	0.107586	5.30597	0.787496	0.469725	0.692601	-7.66765	0.116231	5.32102	3.67099	0.0164223	0.201968	-4.36691	1070	1431	1526	1357	1260	1351	1322	1363	1222	11902
Adm	ENSMUSG00000030790,15	-0.424934	0.383735	-0.908363	0.409141	0.96692	-7.1374	0.297123	0.711587	0.332178	0.754398	0.893555	-7.24411	0.723598	0.514771	0.786633	0.469687	0.64434	-6.89236	81	34	49	63	31	28	34	196	27	543
Adnp2	ENSMUSG00000053950,10	0.0292248	4.35648	0.308862	0.771038	0.96692	-8.25577	0.0357195	4.33164	0.352248	0.74026	0.884265	-7.84814	0.00273306	4.36729	0.069517	0.947469	0.968	-8.06792	597	710	782	735	689	705	624	669	645	6156
Ado	ENSMUSG00000057134,5	0.094215	5.73323	0.554692	0.60521	0.96692	-8.28399	0.0572261	5.68646	0.354421	0.738736	0.883236	-7.98129	-0.0406866	5.75471	-0.711221	0.511033	0.676598	-7.96795	1369	1901	2087	1968	1721	1978	1703	1696	1597	16020
Adora1	ENSMUSG00000042429,8	0.0387235	4.71965	0.616636	0.566954	0.96692	-8.13285	-0.136706	4.60428	-1.5929	0.177307	0.366012	-6.72367	-0.17948	4.64414	-2.37844	0.0671599	0.201968	-5.86525	947	856	863	959	933	857	733	703	770	7621
Adora2a	ENSMUSG00000020178,6	0.107954	2.02715	1.62244	0.171257	0.96692	-6.68564	0.0963858	1.99302	0.817055	0.454243	0.692601	-7.18926	-0.0149111	2.06783	-0.114431	0.913674	0.945925	-7.61493	131	131	139	150	131	154	112	153	128	1229
Adpgk	ENSMUSG00000025236,11	0.132737	4.44537	1.56676	0.183533	0.96692	-7.12727	0.0775776	4.38984	0.705226	0.514868	0.730886	-7.64188	-0.0590021	4.47717	-0.78232	0.471983	0.64434	-7.73794	625	719	797	819	744	785	623	727	701	6540
Adprh	ENSMUSG00000002844,9	0.0622304	5.76415	1.00084	0.367028	0.96692	-7.91692	0.0798754	5.74447	1.58766	0.178468	0.368053	-6.84005	0.0141602	5.7966	0.273114	0.796482	0.894548	-8.21995	1703	1789	1966	1913	1813	1992	1839	1774	1632	16421
Adprhl2	ENSMUSG00000042558,16	-0.0382386	3.0393	-0.22601	0.830973	0.96692	-8.10208	-0.090657	2.98508	-0.531893	0.619546	0.807412	-7.576	-0.0562453	2.98596	-2.02757	0.100117	0.209286	-6.03439	358	242	265	298	273	263	246	249	233	2427
Adprm	ENSMUSG00000020910,16	-0.00256661	3.71562	-0.0179791	0.986416	0.998181	-8.23237	0.0782745	3.72785	0.545255	0.611037	0.803594	-7.67557	0.0771704	3.74765	1.057	0.342331	0.535057	-7.36447	366	517	477	458	421	472	465	414	416	4006
Adra1b	ENSMUSG00000050541,14	-0.160201	1.15656	-0.679375	0.529847	0.96692	-7.50235	0.0462809	1.23054	0.168374	0.873462	0.942632	-7.40017	0.204098	1.16905	1.019	0.358286	0.554127	-6.84073	108	68	70	84	72	61	70	100	60	693
Adra2a	ENSMUSG00000033717,6	0.141249	3.61645	1.63946	0.167673	0.96692	-6.93179	0.0595958	3.5473	0.264068	0.803182	0.920422	-7.78481	-0.0847744	3.63834	-0.375007	0.724154	0.842005	-7.86818	386	377	435	500	393	437	290	520	357	3695
Adra2c	ENSMUSG00000045318,6	-0.0771047	2.83932	-0.599143	0.577598	0.96692	-7.88946	-0.151194	2.77337	-1.10329	0.324421	0.565521	-7.05155	-0.0775149	2.75577	-0.645494	0.549112	0.711007	-7.53546	273	215	268	243	214	261	238	199	182	2093
Adrm1	ENSMUSG00000039041,15	0.0592752	5.1556	0.905213	0.410642	0.96692	-7.94457	0.0154458	5.10545	0.156612	0.882211	0.94723	-7.98744	-0.0475015	5.15575	-0.526323	0.622798	0.768229	-8.0182	1271	1162	1148	1264	1194	1286	1235	1018	1048	10626
Adsl	ENSMUSG00000022407,10	0.00100634	5.20719	0.032335	0.975566	0.998181	-8.40872	-0.00289417	5.17712	-0.10525	0.920504	0.959657	-8.00249	-0.00748699	5.19815	-0.39281	0.711115	0.832287	-8.09578	1288	1247	1249	1344	1217	1243	1152	1183	1101	11024
Adss	ENSMUSG00000015961,8	0.0646184	6.35817	0.665522	0.537895	0.96692	-8.27273	0.00523866	6.30031	0.052973	0.959983	0.98095	-8.10934	-0.0630295	6.35343	-1.97185	0.110014	0.227201	-6.61896	2354	3009	2903	3016	2762	2859	2615	2495	2400	24413
Adssl1	ENSMUSG00000011148,14	-0.72606	0.383395	-2.14602	0.0899982	0.96692	-5.66085	0.407686	0.920657	0.7158	0.508898	0.725733	-7.0584	1.13146	0.578752	2.0441	0.100645	0.210206	-5.45117	58	38	83	40	36	28	39	135	61	518
Aebp1	ENSMUSG00000020473,13	-0.284546	5.90328	-0.559417	0.602236	0.96692	-8.29857	-0.0146091	6.00987	-0.0223305	0.983123	0.992535	-8.08533	0.268593	5.88547	0.439492	0.679983	0.8101	-8.1612	3986	1666	1739	2985	1724	1242	1362	4553	1343	20600
Aebp2	ENSMUSG00000030232,18	0.0804277	5.30816	0.671146	0.534618	0.96692	-8.15851	0.0705321	5.2745	0.706821	0.513964	0.729913	-7.73002	-0.0131089	5.33579	-0.151623	0.885844	0.934116	-8.19154	1133	1397	1438	1409	1266	1529	1290	1358	1132	11952
Aen	ENSMUSG00000030609,18	-0.0312969	4.6848	-0.266259	0.801658	0.96692	-8.30859	-0.10112	4.62176	-0.726818	0.502729	0.719924	-7.6495	-0.0736199	4.62672	-0.852476	0.435669	0.631883	-7.69874	1033	794	853	878	895	844	833	695	737	7562
Afap1	ENSMUSG00000029094,12	-0.0371963	5.48301	-0.583185	0.587418	0.96692	-8.23911	-0.0398661	5.45386	-1.58197	0.177619	0.366507	-6.82008	-0.00648517	5.45569	-0.0975457	0.926359	0.954151	-8.21535	1495	1556	1593	1677	1527	1354	1369	1392	1348	13311
Afap1l1	ENSMUSG00000033032,15	-0.0900309	4.46344	-0.658743	0.541864	0.96692	-8.07333	-0.0343228	4.4637	-0.292566	0.782627	0.90959	-7.88538	0.0520033	4.43845	0.42815	0.687652	0.815971	-7.97244	873	752	716	863	725	628	634	771	673	6635
Afap1l2	ENSMUSG00000025083,18	0.0893017	5.58051	0.633011	0.557107	0.96692	-8.21529	-0.0242263	5.49645	-0.24453	0.817383	0.928537	-8.00309	-0.117542	5.561	-0.796347	0.464546	0.64434	-7.87358	1673	1444	1649	2113	1467	1561	1285	1546	1436	14174
Afdn	ENSMUSG00000068036,15	-0.0175352	6.73728	-0.12362	0.906879	0.96692	-8.5598	-0.0243586	6.70546	-0.185997	0.860393	0.935782	-8.12466	-0.0098846	6.71691	-0.0987472	0.925455	0.953738	-8.37279	4263	3491	3315	3905	3891	3162	3453	3566	2859	31905
Aff1	ENSMUSG00000029313,18	-0.137413	3.62948	-0.858374	0.433489	0.96692	-7.80456	-0.0590269	3.63993	-0.275862	0.794651	0.916316	-7.79306	0.0757017	3.59073	0.333743	0.753101	0.86413	-7.87757	499	394	443	505	347	376	355	528	307	3754
Aff2	ENSMUSG00000031189,12	0.135614	3.97269	2.05907	0.0999877	0.96692	-6.44016	-0.0670342	3.84291	-1.19301	0.290928	0.521015	-7.11133	-0.206044	3.93163	-5.63421	0.00304387	0.201968	-2.20243	478	551	507	558	570	564	446	460	426	4560
Aff3	ENSMUSG00000037138,17	0.0174263	5.97858	0.602133	0.575656	0.96692	-8.27866	-0.0237664	5.92979	-0.57018	0.595353	0.793497	-7.8874	-0.0448514	5.95927	-1.32314	0.247142	0.426843	-7.38325	2025	2167	2235	2262	2154	2113	2016	1896	1839	18707
Aff4	ENSMUSG00000049470,13	0.12275	7.5381	1.96748	0.111807	0.96692	-6.94171	0.089431	7.49289	1.49244	0.200945	0.408097	-7.10551	-0.0366686	7.57523	-0.975967	0.377106	0.575279	-7.95436	5535	6347	6408	6644	6569	6746	5917	6302	5472	55940
Afg1l	ENSMUSG00000038302,14	-0.0226637	2.96929	-0.453283	0.671097	0.96692	-7.99912	-0.0414696	2.93117	-0.835216	0.444788	0.692601	-7.33975	-0.0220119	2.94057	-0.410697	0.699539	0.823951	-7.71652	255	278	275	276	275	248	248	253	214	2322
Afg3l1	ENSMUSG00000031967,15	-0.0336847	4.46657	-0.787887	0.469726	0.96692	-7.9717	0.0167944	4.46368	0.365166	0.731223	0.878051	-7.85713	0.0468004	4.46747	2.26612	0.0743854	0.201968	-5.97628	797	722	774	782	728	738	718	710	681	6650
Afg3l2	ENSMUSG00000024527,10	0.0300064	6.02715	0.805019	0.460713	0.96692	-8.12692	0.0490493	6.00803	0.748761	0.490605	0.708628	-7.76368	0.015721	6.04393	0.226835	0.830189	0.916155	-8.26493	2221	2132	2261	2245	2265	2270	2305	2073	1866	19638
Afp	ENSMUSG00000054932,6	-1.05424	-0.103374	-0.719011	0.507283	0.96692	-7.18257	0.960536	0.869239	0.755464	0.486943	0.705374	-7.00949	2.01494	0.362575	1.49827	0.198657	0.37219	-6.05897	112	10	81	25	77	5	42	268	45	665
Aftph	ENSMUSG00000049659,15	0.0839372	5.55413	0.578137	0.590546	0.96692	-8.24998	0.110112	5.53867	0.777655	0.474966	0.694771	-7.69759	0.0227355	5.60184	0.585765	0.585317	0.741927	-8.03905	1247	1750	1733	1647	1637	1694	1587	1574	1434	14303
Aga	ENSMUSG00000031521,5	0.0407227	3.1348	0.664216	0.538658	0.96692	-7.89148	0.13874	3.15469	0.761065	0.483899	0.702682	-7.43847	0.095479	3.19546	0.519244	0.627355	0.771774	-7.71049	282	293	312	339	278	301	260	398	249	2712
Agap1	ENSMUSG00000055013,15	0.038994	6.41065	0.923676	0.401906	0.96692	-8.05913	-0.119174	6.30359	-2.08326	0.096749	0.215262	-6.25358	-0.162051	6.34379	-2.63284	0.0498589	0.201968	-5.75747	2936	2766	2901	3053	2799	3026	2421	2333	2453	24688
Agap2	ENSMUSG00000025422,9	-0.00342151	5.44455	-0.0184351	0.986071	0.998181	-8.43468	-0.190691	5.32263	-0.958554	0.385562	0.641959	-7.51323	-0.190681	5.34117	-2.71675	0.0452892	0.201968	-5.52379	1911	1382	1251	1514	1482	1477	1326	1138	1106	12587
Agap3	ENSMUSG00000023353,14	0.0115233	6.35668	0.0802511	0.93944	0.985191	-8.52628	0.00269975	6.32447	0.017892	0.986477	0.993817	-8.11295	-0.0126128	6.35044	-0.188859	0.858171	0.917981	-8.31239	3349	2650	2444	2984	2857	2632	2636	2422	2571	24545
Agbl3	ENSMUSG00000038836,15	0.0287638	2.74575	0.1761	0.867768	0.96692	-8.06518	0.15955	2.78161	0.889296	0.418059	0.673582	-7.2664	0.128213	2.81751	1.52157	0.192945	0.363304	-6.65229	176	260	253	231	235	230	240	259	195	2079
Agbl5	ENSMUSG00000029165,17	0.0571419	3.96515	0.743599	0.493633	0.96692	-7.94728	-0.0552754	3.88093	-0.932265	0.397646	0.653916	-7.38587	-0.116032	3.92981	-2.27487	0.0760148	0.201968	-5.89222	526	553	491	584	560	497	468	467	438	4584
Agfg1	ENSMUSG00000026159,13	0.106841	7.11147	0.497047	0.642187	0.96692	-8.46025	0.110637	7.08474	0.540989	0.613746	0.805021	-8.00455	0.00014059	7.1597	0.00171803	0.9987	0.999331	-8.43181	3322	5207	5442	4689	4780	5327	4710	4416	4296	42189
Agfg2	ENSMUSG00000029722,15	-0.0139861	4.2402	-0.235309	0.82417	0.96692	-8.26579	-0.0369492	4.20058	-0.425198	0.689904	0.851872	-7.79994	-0.026847	4.21464	-0.265037	0.802331	0.89793	-8.00525	624	668	653	623	642	670	621	524	584	5609
Aggf1	ENSMUSG00000021681,8	0.00266343	5.18762	0.0283353	0.978593	0.998181	-8.40675	0.00167006	5.1587	0.0156421	0.988178	0.994738	-8.00728	-0.00433693	5.18049	-0.085313	0.935565	0.960027	-8.18054	1405	1133	1208	1316	1237	1201	1230	1159	1017	10906
Agk	ENSMUSG00000029916,11	-0.0184624	4.63408	-0.225147	0.831605	0.96692	-8.31497	-0.0586524	4.58592	-0.536678	0.616491	0.806012	-7.78006	-0.0439807	4.59727	-0.453925	0.670288	0.803153	-7.98206	895	882	787	851	885	803	827	681	735	7346
Agl	ENSMUSG00000033400,14	0.0293969	6.40395	0.564727	0.598906	0.96692	-8.3472	0.0653494	6.39331	1.07581	0.335341	0.579525	-7.49117	0.0326289	6.42899	0.883255	0.420435	0.618066	-7.90575	2701	2767	3138	2971	2935	2897	2774	2936	2482	25601
Ago1	ENSMUSG00000041530,16	0.171412	5.52177	1.96093	0.112708	0.96692	-6.74405	0.00737729	5.41199	0.0736548	0.944389	0.972906	-8.02812	-0.167946	5.51835	-2.47276	0.0600722	0.201968	-5.86037	1293	1572	1590	1826	1587	1612	1268	1406	1388	13542
Ago2	ENSMUSG00000036698,11	0.0375032	6.82035	0.252477	0.811656	0.96692	-8.53894	0.0314969	6.78911	0.212443	0.84088	0.933868	-8.12536	-0.00988286	6.82911	-0.146918	0.889355	0.936084	-8.37918	3047	4167	4352	3867	4111	3812	3545	3479	3609	33989
Ago3	ENSMUSG00000028842,15	0.0298138	4.66899	0.216857	0.837686	0.96692	-8.32116	0.0171122	4.63356	0.123679	0.906806	0.954457	-7.94579	-0.0157821	4.67	-0.204622	0.846524	0.916155	-8.08959	721	853	1031	845	906	895	844	843	695	7633
Ago4	ENSMUSG00000042500,11	0.0938869	2.52765	1.09741	0.327018	0.96692	-7.39458	0.0919584	2.49801	0.60674	0.572804	0.77905	-7.44525	-0.00539128	2.5659	-0.0420977	0.968169	0.981577	-7.73525	166	204	203	213	194	205	226	172	161	1744
Agpat1	ENSMUSG00000034254,17	-0.00659786	6.17194	-0.148021	0.888648	0.96692	-8.49786	-0.058706	6.1179	-1.37419	0.232752	0.444915	-7.13298	-0.0557997	6.13505	-1.79715	0.13667	0.27229	-6.81848	2572	2408	2429	2653	2375	2381	2188	2176	2105	21287
Agpat2	ENSMUSG00000026922,13	-0.0354575	2.24581	-0.163242	0.877315	0.96692	-7.97678	0.0406355	2.25539	0.171093	0.871443	0.942029	-7.5989	0.0730989	2.25692	0.470504	0.659242	0.796005	-7.53564	216	144	141	177	169	137	135	190	139	1448
Agpat3	ENSMUSG00000001211,15	0.0469109	6.55519	1.81647	0.134142	0.96692	-7.03726	-0.0242885	6.4913	-0.75115	0.489085	0.707129	-7.8039	-0.074761	6.53551	-2.07746	0.0966081	0.202691	-6.5033	3108	3210	3163	3338	3204	3293	2970	2811	2705	27802
Agpat4	ENSMUSG00000023827,8	0.0671547	5.42622	1.32701	0.24708	0.96692	-7.5256	0.064683	5.397	1.47828	0.204518	0.414382	-6.94305	-0.00616422	5.45104	-0.164271	0.87642	0.929642	-8.20418	1484	1355	1469	1645	1432	1458	1351	1421	1325	12940
Agpat5	ENSMUSG00000031467,10	0.105113	5.75381	0.588391	0.584202	0.96692	-8.26424	0.145111	5.74499	0.803896	0.461087	0.692601	-7.69417	0.0367265	5.81894	0.630205	0.558236	0.718722	-8.03635	1357	1921	2149	1906	1874	1981	1874	1911	1593	16566
Agps	ENSMUSG00000042410,16	0.122638	6.59474	0.549167	0.608698	0.96692	-8.37656	0.10021	6.55511	0.458823	0.667285	0.839667	-8.00771	-0.0262145	6.63795	-0.35019	0.741504	0.855138	-8.29561	2265	3684	3789	3328	3389	3674	3028	3111	3120	29388
Agrn	ENSMUSG00000041936,18	0.107604	7.26678	0.905552	0.410481	0.96692	-8.16288	-0.0782607	7.14634	-0.683111	0.527513	0.741871	-7.91171	-0.189729	7.22015	-2.30331	0.0734626	0.201968	-6.28975	5452	5366	4455	6176	5361	4969	4399	4232	4479	44889
Agt	ENSMUSG00000031980,9	0.0166935	2.37295	0.0669724	0.94944	0.991314	-8.01435	0.289033	2.47879	0.823515	0.450912	0.692601	-7.27253	0.271132	2.50563	0.737835	0.496153	0.662955	-7.41082	216	162	155	221	196	130	181	311	130	1702
Agtpbp1	ENSMUSG00000021557,15	0.019524	8.48143	0.340393	0.748679	0.96692	-8.67229	-0.0444677	8.42101	-0.513667	0.631265	0.816398	-8.12549	-0.0676616	8.45178	-0.697191	0.519004	0.683547	-8.29915	11506	12479	12412	11945	12624	12473	12031	9907	10266	105643
Agtr1a	ENSMUSG00000049115,15	0.266751	3.36984	1.06352	0.340606	0.96692	-7.56755	0.202377	3.30986	0.754332	0.48756	0.705973	-7.46724	-0.0680242	3.46454	-0.780561	0.472922	0.64434	-7.57336	220	420	359	401	382	383	300	365	349	3179
Agtr1b	ENSMUSG00000054988,9	-0.0206872	2.30177	-0.178182	0.866224	0.96692	-7.98434	-0.216431	2.17299	-1.53686	0.19013	0.388736	-6.44321	-0.197873	2.18467	-1.33372	0.24392	0.423464	-6.73572	151	170	188	156	163	185	143	153	105	1414
Agtr2	ENSMUSG00000068122,10	0.180355	4.3206	0.749603	0.490341	0.96692	-7.98598	0.640658	4.52161	1.25518	0.269593	0.490789	-7.11835	0.457886	4.63328	1.01371	0.360554	0.556957	-7.54557	482	600	908	778	757	659	538	1696	821	7239
Agtrap	ENSMUSG00000029007,8	0.0448164	3.63248	0.304328	0.774275	0.96692	-8.16526	0.0685611	3.61637	0.341884	0.747547	0.889065	-7.76593	0.0203101	3.65865	0.121187	0.908606	0.9435	-7.94739	492	360	409	498	390	413	331	500	379	3772
Ahctf1	ENSMUSG00000026491,13	0.147196	5.65059	1.51621	0.195436	0.96692	-7.32245	0.104948	5.60108	1.06678	0.338999	0.584397	-7.43054	-0.0456818	5.69558	-2.58141	0.0507548	0.201968	-5.72544	1395	1781	1743	1869	1801	1770	1602	1690	1498	15149
Ahcy	ENSMUSG00000027597,15	0.105572	3.29818	3.08386	0.0303234	0.96692	-5.03539	0.0737673	3.25451	0.838636	0.443188	0.692601	-7.38732	-0.0356156	3.32781	-0.403798	0.704265	0.827165	-7.79776	319	314	338	379	338	333	277	343	313	2954
Ahcyl1	ENSMUSG00000027893,14	0.035728	7.35738	0.453201	0.671152	0.96692	-8.50913	-0.00392147	7.30909	-0.0519298	0.96077	0.981416	-8.19379	-0.043056	7.34788	-1.41696	0.219904	0.396146	-7.44057	4904	5934	5816	5768	5526	5794	5086	5294	4693	48815
Ahcyl2	ENSMUSG00000029772,17	0.083697	6.04186	1.10612	0.323606	0.96692	-7.83721	0.112655	6.02783	0.982032	0.375028	0.630599	-7.55474	0.0257431	6.09051	0.308998	0.770691	0.877419	-8.24443	1927	2289	2367	2439	2293	2250	2005	2516	1968	20054
Ahdc1	ENSMUSG00000037692,14	0.0616878	4.80557	0.485481	0.64976	0.96692	-8.22505	0.0623432	4.77775	0.516618	0.62936	0.814754	-7.81209	-0.00274131	4.82865	-0.0360526	0.972737	0.984679	-8.13641	1083	835	904	1117	908	925	904	970	797	8443
Ahi1	ENSMUSG00000019986,17	0.10982	6.24094	1.09324	0.328666	0.96692	-7.87142	-0.109301	6.10325	-1.01552	0.360419	0.612682	-7.52777	-0.222802	6.17888	-2.92869	0.0357	0.201968	-5.36241	2367	2811	2311	2682	2596	2809	2225	1981	2093	21875
Ahnak	ENSMUSG00000069833,13	-0.072734	7.20684	-0.776501	0.475789	0.96692	-8.27135	0.13748	7.28337	1.26272	0.267105	0.487236	-7.36072	0.207174	7.26769	1.51912	0.193539	0.364282	-7.30685	4925	5222	5389	5184	5428	4285	4815	6249	4608	46105
Ahnak2	ENSMUSG00000072812,4	-0.22679	7.62029	-1.31942	0.249403	0.96692	-7.75892	-0.101286	7.65413	-0.386849	0.716167	0.867433	-8.13324	0.122449	7.56146	0.564964	0.598272	0.750674	-8.29162	9055	6275	6764	5996	6630	6106	8520	5460	5024	59830
Ahr	ENSMUSG00000019256,17	0.117712	5.4874	0.59958	0.57733	0.96692	-8.22855	0.0132492	5.4072	0.0690269	0.947877	0.97477	-8.02808	-0.108313	5.48705	-1.35463	0.237662	0.414611	-7.28609	1103	1623	1776	1751	1428	1646	1282	1430	1345	13384
Ahrr	ENSMUSG00000021575,16	0.0864884	1.43464	0.879091	0.423263	0.96692	-7.39496	-0.0365454	1.34982	-0.133144	0.899723	0.953511	-7.43057	-0.129206	1.41297	-0.459515	0.666553	0.800558	-7.34135	84	87	97	112	90	85	62	71	114	802
Ahsa1	ENSMUSG00000021037,7	-0.0751709	6.22484	-0.709219	0.512793	0.96692	-8.22585	-0.0363683	6.21614	-0.349354	0.742292	0.885589	-8.03043	0.0351175	6.19909	0.881502	0.421291	0.618752	-7.87903	2973	2322	2612	2614	2550	2340	2381	2333	2265	22390
Ahsa2	ENSMUSG00000020288,13	-0.0684173	6.14991	-1.3442	0.241893	0.96692	-7.5814	-0.0247003	6.14342	-0.363316	0.732514	0.878786	-8.01818	0.0400945	6.13015	0.787414	0.469272	0.64434	-7.95336	2303	2462	2700	2430	2382	2324	2408	2175	2091	21275
Ahsg	ENSMUSG00000022868,6	-0.924171	-0.618022	-0.526452	0.623164	0.96692	-7.20716	0.933062	0.279674	0.644081	0.550348	0.761216	-6.97343	1.85568	-0.164529	1.45558	0.209551	0.388885	-5.99539	106	4	60	24	49	3	27	156	34	463
AI197445	ENSMUSG00000114780,1	0.0575563	1.89515	0.495107	0.643454	0.96692	-7.77902	-0.13894	1.76559	-0.987192	0.372745	0.627597	-6.9866	-0.198348	1.81594	-1.13271	0.312368	0.499739	-6.87586	127	123	122	118	148	125	112	120	79	1074
AI413582	ENSMUSG00000062753,14	0.0666067	4.48753	3.7904	0.0140825	0.96692	-4.33269	0.0511993	4.45116	0.8609	0.432003	0.686601	-7.51793	-0.0186091	4.50519	-0.322798	0.760861	0.870263	-8.02863	743	751	751	806	776	779	771	728	624	6729
AI429214	ENSMUSG00000074384,4	0.0670946	1.64636	0.436414	0.682423	0.96692	-7.76019	0.117815	1.64176	0.912927	0.406731	0.662391	-7.03493	0.0480301	1.69745	0.381803	0.719436	0.838207	-7.44879	87	113	114	101	125	104	100	117	92	953
AI480526	ENSMUSG00000090086,7	-0.2489	2.02244	-0.717181	0.50831	0.96692	-7.65225	-0.121968	2.06186	-0.349382	0.742272	0.885589	-7.50688	0.121561	1.95622	0.565607	0.597869	0.750287	-7.40972	107	233	138	164	115	109	119	112	152	1249
AI504432	ENSMUSG00000056145,5	-0.218795	2.19601	-0.881002	0.422329	0.96692	-7.54647	0.0922915	2.32344	0.37054	0.727477	0.875118	-7.54687	0.307143	2.23614	3.8293	0.0140732	0.201968	-3.65896	116	203	202	143	146	147	174	153	164	1448
AI506816	ENSMUSG00000105987,4	0.026755	5.27573	0.168781	0.873199	0.96692	-8.39949	-0.025774	5.22145	-0.177437	0.866735	0.939961	-7.99432	-0.05636	5.25567	-0.693391	0.521177	0.685661	-7.91706	1064	1344	1574	1501	1184	1356	1246	1168	1105	11542
AI593442	ENSMUSG00000078307,3	0.113925	6.39277	0.431137	0.685987	0.96692	-8.42284	0.0985707	6.35653	0.376606	0.723261	0.872285	-8.03095	-0.0192445	6.43529	-0.139746	0.894713	0.939407	-8.33255	1889	3257	3405	2771	2895	3365	2990	2427	2676	25675
AI597479	ENSMUSG00000010290,7	0.0841729	4.76751	0.542198	0.613114	0.96692	-8.18718	0.0325655	4.71324	0.21662	0.83781	0.933868	-7.93493	-0.0550391	4.77651	-0.829494	0.447321	0.634934	-7.74031	718	1015	1010	970	898	1021	811	909	805	8157
AI661453	ENSMUSG00000034382,14	-0.19316	1.19456	-0.673791	0.533081	0.96692	-7.5145	0.0786074	1.30359	0.287524	0.786249	0.911909	-7.38259	0.268026	1.22546	1.2713	0.263529	0.440174	-6.58218	116	72	69	84	82	56	66	94	82	721
AI837181	ENSMUSG00000047423,10	0.0147824	4.51339	0.16262	0.877777	0.96692	-8.31566	0.042184	4.49864	0.600255	0.576763	0.782135	-7.7299	0.0240189	4.5268	0.389397	0.714181	0.834502	-8.00384	788	826	717	766	838	759	749	733	698	6874
AI854703	ENSMUSG00000053297,14	0.102625	4.06338	1.16369	0.30182	0.96692	-7.55515	0.0730626	4.0206	0.790145	0.468322	0.692601	-7.53112	-0.0332431	4.09234	-0.858819	0.432494	0.629211	-7.61301	592	569	496	606	595	580	528	526	527	5019
AI987944	ENSMUSG00000056383,10	0.0958069	3.44578	0.882582	0.421558	0.96692	-7.75662	0.0377205	3.38829	0.348836	0.742656	0.885772	-7.73163	-0.0616013	3.45746	-1.62987	0.167969	0.323453	-6.64475	303	387	396	386	384	388	351	337	320	3252
Aida	ENSMUSG00000042901,10	0.0265975	6.27278	0.245947	0.816408	0.96692	-8.48496	0.0167303	6.23904	0.169333	0.87275	0.942419	-8.08836	-0.0131256	6.27356	-0.167057	0.874348	0.928333	-8.30758	2275	2847	2763	2544	2697	2796	2613	2439	2188	23162
Aif1l	ENSMUSG00000001864,13	-0.0481774	3.19287	-0.590045	0.583183	0.96692	-7.95263	-0.00320439	3.18807	-0.0344495	0.973968	0.988287	-7.7742	0.0407308	3.1846	0.424283	0.690277	0.817451	-7.76006	298	305	351	340	277	310	265	299	302	2747
Aifm1	ENSMUSG00000036932,14	-0.0593159	4.74849	-0.762397	0.483379	0.96692	-8.02529	0.0128616	4.7564	0.129452	0.902486	0.953511	-7.95752	0.0686298	4.74707	0.942169	0.392459	0.590857	-7.63279	1023	912	882	965	895	851	963	834	791	8116
Aifm2	ENSMUSG00000020085,15	0.097905	1.81125	0.376798	0.723219	0.96692	-7.82231	0.217235	1.84258	0.655705	0.543478	0.755289	-7.28931	0.116591	1.91015	0.496333	0.642234	0.783288	-7.44089	164	99	95	142	125	107	95	170	112	1109
Aifm3	ENSMUSG00000022763,18	-0.231783	3.07474	-0.561671	0.600821	0.96692	-7.95208	0.0744291	3.1989	0.162342	0.877946	0.945328	-7.76071	0.304362	3.10009	0.711821	0.510695	0.676263	-7.55819	476	284	225	376	278	179	255	502	205	2780
Aig1	ENSMUSG00000019806,13	0.0885888	5.41851	1.19441	0.290742	0.96692	-7.67575	-0.0049405	5.34321	-0.0889941	0.932842	0.966543	-8.02016	-0.0970481	5.40865	-1.72217	0.150089	0.293845	-6.82237	1307	1404	1547	1484	1464	1593	1332	1299	1223	12653
Aimp1	ENSMUSG00000028029,10	-0.0349695	5.74147	-0.255562	0.809415	0.96692	-8.42683	0.0325224	5.74648	0.202887	0.847917	0.933868	-8.03719	0.0645276	5.74938	0.618682	0.565179	0.72512	-8.03559	2193	1744	1655	1855	1901	1687	1970	1781	1448	16234
Aimp2	ENSMUSG00000029610,13	-0.0909123	4.96021	-0.994134	0.369956	0.96692	-7.83725	0.0535639	5.00387	0.527329	0.622469	0.80925	-7.8282	0.141182	4.97904	2.0256	0.10296	0.214404	-6.37317	1222	1025	1054	1042	1075	987	1143	1042	931	9521
Aip	ENSMUSG00000024847,15	-0.0129499	5.36926	-0.0741742	0.944015	0.987917	-8.4235	0.0045483	5.34985	0.0270217	0.979579	0.991279	-8.02516	0.0141838	5.36341	0.213191	0.840211	0.916155	-8.18167	1774	1306	1232	1529	1451	1264	1284	1403	1201	12444
Airn	ENSMUSG00000078247,4	0.055392	2.77608	0.684929	0.526644	0.96692	-7.8172	-0.0100388	2.71359	-0.0623239	0.95293	0.977341	-7.69566	-0.0678342	2.76197	-0.491882	0.645147	0.785615	-7.63579	253	213	223	240	241	236	190	263	176	2035
Ajm1	ENSMUSG00000029419,8	0.106878	4.25291	1.31203	0.251687	0.96692	-7.41108	-0.0124207	4.16545	-0.101434	0.923491	0.961301	-7.89759	-0.123435	4.23957	-1.18578	0.292775	0.476205	-7.30548	690	586	610	681	699	655	610	506	587	5624
Ajuba	ENSMUSG00000022178,11	-0.0883506	2.27132	-0.474329	0.657107	0.96692	-7.86402	0.0513343	2.31276	0.138247	0.89591	0.952945	-7.61549	0.137355	2.2877	0.335427	0.75191	0.863192	-7.60646	167	160	183	210	124	157	107	277	137	1522
Ak1	ENSMUSG00000026817,14	-0.19905	5.33836	-1.16363	0.301841	0.96692	-7.70094	-0.0485512	5.38504	-0.270521	0.798511	0.918133	-7.98464	0.147372	5.30593	2.01209	0.104687	0.217527	-6.43432	1850	1239	1416	1347	1335	1206	1272	1480	1170	12315
Ak2	ENSMUSG00000028792,14	-0.0233029	4.55082	-0.33636	0.751524	0.96692	-8.26797	-0.0370637	4.51589	-0.66361	0.53884	0.751119	-7.68679	-0.0174459	4.52469	-0.368748	0.728512	0.845374	-8.01268	851	749	824	863	803	730	738	729	680	6967
Ak3	ENSMUSG00000024782,7	0.0992195	5.9079	0.92684	0.400425	0.96692	-8.00411	0.120331	5.88991	0.989757	0.371614	0.626209	-7.53486	0.0178413	5.96049	0.21278	0.840514	0.916155	-8.25819	1693	2086	2201	2213	1975	2215	1850	2250	1805	18288
Ak4	ENSMUSG00000028527,18	0.519879	4.23953	4.0761	0.0115991	0.96692	-4.03556	0.38389	4.14233	1.66195	0.162693	0.339073	-6.58651	-0.138378	4.42307	-0.728846	0.501144	0.667822	-7.77329	443	569	619	857	734	741	587	874	507	5931
Ak5	ENSMUSG00000039058,11	-0.0394679	6.56806	-0.413638	0.697871	0.96692	-8.44949	0.0501497	6.58428	0.533367	0.618604	0.807404	-7.96746	0.0862615	6.58538	0.990021	0.37087	0.568727	-7.82277	3583	3196	3096	3070	3393	3175	3424	3003	2878	28818
Ak6	ENSMUSG00000078941,9	-0.0339623	3.98338	-0.275542	0.794948	0.96692	-8.2217	-0.0307545	3.95683	-0.21469	0.839228	0.933868	-7.85134	-0.000540499	3.96021	-0.0069148	0.99477	0.996717	-8.00739	643	484	524	564	536	508	547	461	456	4723
Akap1	ENSMUSG00000018428,15	0.0500611	4.80042	1.45496	0.210815	0.96692	-7.3051	0.0175722	4.75589	0.423306	0.691189	0.852665	-7.86072	-0.0360379	4.80158	-1.10995	0.320981	0.510354	-7.47013	950	890	967	1022	931	965	909	873	804	8311
Akap10	ENSMUSG00000047804,15	0.0851407	5.02079	0.98556	0.373728	0.96692	-7.85243	0.0495575	4.97464	0.639378	0.553144	0.763071	-7.75135	-0.0391491	5.0383	-0.673437	0.532694	0.696076	-7.90311	957	1105	1178	1148	1088	1207	983	1066	993	9725
Akap11	ENSMUSG00000022016,16	0.0959154	7.74947	0.590074	0.583165	0.96692	-8.46595	0.094509	7.71992	0.637378	0.554336	0.764007	-7.99126	-0.00493724	7.78942	-0.0430887	0.96742	0.981194	-8.50424	5749	7817	7985	6924	8017	8015	7681	6617	6475	65280
Akap12	ENSMUSG00000038587,9	-0.0118761	9.53778	-0.0771716	0.941758	0.986802	-8.83926	-0.138594	9.44648	-0.804776	0.460627	0.692601	-7.98604	-0.130124	9.46062	-1.28558	0.258918	0.436623	-7.82909	31119	23553	22641	28161	24723	23474	24348	19894	19305	217218
Akap13	ENSMUSG00000066406,15	0.0142004	5.78365	0.205597	0.845968	0.96692	-8.44515	0.00415311	5.75022	0.0851647	0.935723	0.968165	-8.05804	-0.0133504	5.77792	-0.176177	0.867572	0.924677	-8.24369	1906	1816	1896	1991	2018	1702	1695	1875	1566	16465
Akap17b	ENSMUSG00000059708,12	-0.0584253	5.15253	-0.923372	0.402049	0.96692	-7.92715	0.0517766	5.17901	0.875535	0.424771	0.678724	-7.57822	0.106803	5.17083	1.30053	0.25417	0.436623	-7.30817	1214	1268	1236	1141	1242	1205	1283	1136	1094	10819
Akap5	ENSMUSG00000021057,15	-0.144174	4.60751	-2.53829	0.0566443	0.96692	-5.8961	-0.202299	4.55029	-2.42886	0.0640045	0.147663	-5.64057	-0.061923	4.499	-0.624341	0.561762	0.722022	-7.86292	863	849	914	815	842	732	779	642	662	7098
Akap6	ENSMUSG00000061603,8	-0.0872769	8.73079	-1.19428	0.290787	0.96692	-8.00966	-0.0688936	8.71146	-0.997842	0.36807	0.622541	-7.75453	0.0147705	8.68888	0.14531	0.890556	0.936866	-8.59325	14716	14800	15356	13415	15266	13806	14383	12248	12387	126377
Akap7	ENSMUSG00000039166,16	-0.018532	5.14305	-0.238383	0.821924	0.96692	-8.36799	0.0774215	5.16223	0.95246	0.388336	0.644416	-7.5043	0.0928614	5.17392	1.48371	0.202308	0.377677	-7.09029	1103	1314	1235	1190	1249	1174	1230	1244	1033	10772
Akap8	ENSMUSG00000024045,6	-0.12663	5.78391	-1.79145	0.138863	0.96692	-6.99026	-0.171956	5.73336	-2.10551	0.094168	0.209845	-6.17437	-0.0490427	5.69036	-0.82827	0.447948	0.635639	-7.86275	2048	2034	1826	1949	1717	1765	1699	1525	1545	16108
Akap8l	ENSMUSG00000002625,10	-0.127713	5.32574	-0.738288	0.496559	0.96692	-8.10837	-0.153025	5.28558	-0.885189	0.420054	0.675054	-7.57924	-0.0292026	5.24151	-0.314279	0.766923	0.874565	-8.13367	1758	1375	1216	1493	1280	1189	1259	1101	1160	11831
Akap9	ENSMUSG00000040407,18	-0.0835248	7.10288	-0.382854	0.719022	0.96692	-8.51812	0.00346581	7.11723	0.0132013	0.990022	0.995277	-8.17974	0.0842451	7.09613	0.395058	0.710275	0.831571	-8.3311	6276	4297	4187	4274	5285	4252	5840	4167	3504	42082
Akip1	ENSMUSG00000031023,5	-0.100853	2.68055	-0.456377	0.66903	0.96692	-7.94864	0.0796703	2.74327	0.466313	0.662301	0.83655	-7.57415	0.17696	2.71142	0.892132	0.41612	0.61356	-7.32315	273	209	204	270	215	163	204	261	193	1992
Akirin1	ENSMUSG00000023075,9	0.0548576	5.42362	0.420107	0.693466	0.96692	-8.32712	0.0303342	5.38274	0.282295	0.790013	0.913873	-7.98064	-0.0279821	5.43151	-0.370901	0.727012	0.844215	-8.13563	1209	1555	1580	1430	1454	1625	1348	1373	1288	12862
Akirin2	ENSMUSG00000028291,7	0.0562878	6.13538	0.822376	0.451716	0.96692	-8.12307	0.0669425	6.11224	1.00183	0.366332	0.620338	-7.54247	0.00720124	6.16138	0.251481	0.81218	0.904939	-8.27247	2112	2424	2548	2477	2426	2473	2237	2377	2123	21197
Akna	ENSMUSG00000039158,11	0.0705331	1.9816	0.369347	0.728398	0.96692	-7.85977	0.133	1.98574	0.596648	0.578973	0.78384	-7.35816	0.0591232	2.03944	0.221418	0.834164	0.916155	-7.58695	143	131	121	177	139	107	102	177	124	1221
Akr1a1	ENSMUSG00000028692,14	0.0240369	8.52224	0.419204	0.69408	0.96692	-8.64086	0.0722856	8.51804	1.27878	0.261877	0.479708	-7.43772	0.0449261	8.55061	1.27081	0.26369	0.440332	-7.74911	13211	12057	12134	13278	12914	11985	12045	12719	11026	111369
Akr1b10	ENSMUSG00000061758,13	0.155817	1.82488	0.990744	0.371443	0.96692	-7.3688	0.101274	1.76885	0.375961	0.723709	0.872487	-7.4402	-0.0574508	1.86748	-0.228812	0.828739	0.916155	-7.54412	110	98	138	143	135	108	85	159	102	1078
Akr1b3	ENSMUSG00000001642,18	-0.0555798	3.89996	-0.604814	0.574133	0.96692	-8.04248	-0.0044329	3.89777	-0.0647888	0.951071	0.976391	-7.86947	0.0471881	3.89074	0.560759	0.600912	0.75249	-7.81143	473	527	562	533	535	443	463	474	477	4487
Akr1b8	ENSMUSG00000029762,6	0.154643	3.62261	1.4201	0.220206	0.96692	-7.20244	-0.048275	3.49316	-0.440576	0.679512	0.846655	-7.70359	-0.206684	3.59051	-3.20716	0.0264035	0.201968	-4.65439	455	366	380	495	429	415	379	349	325	3593
Akr1c14	ENSMUSG00000033715,15	-0.213906	1.47435	-0.981972	0.375315	0.96692	-7.3049	0.484341	1.79403	1.08771	0.330574	0.573257	-6.88919	0.696864	1.70653	1.55185	0.185767	0.351852	-6.35826	80	121	109	111	72	85	89	240	101	1008
Akr1e1	ENSMUSG00000045410,18	0.196423	4.12918	1.78695	0.139638	0.96692	-6.81115	-0.0982027	3.95296	-1.41417	0.221488	0.436614	-6.86938	-0.297639	4.0721	-3.12148	0.0289329	0.201968	-4.83816	556	597	523	608	716	608	481	508	435	5032
Akr7a5	ENSMUSG00000028743,7	0.0725317	3.64033	0.588934	0.583868	0.96692	-8.01852	0.0675134	3.61046	0.674802	0.532319	0.745809	-7.57135	-0.00902047	3.66637	-0.0986881	0.9255	0.953738	-7.95166	466	400	384	514	409	399	379	418	391	3760
Akt1	ENSMUSG00000001729,14	-0.026885	7.68791	-0.253546	0.810879	0.96692	-8.62548	-0.0138138	7.66629	-0.129377	0.902542	0.953511	-8.21374	0.00955595	7.6733	0.494126	0.643317	0.784228	-8.34784	8192	6535	6716	7316	6971	6740	6577	6500	6147	61694
Akt1s1	ENSMUSG00000011096,17	-0.19609	4.82231	-1.19079	0.292028	0.96692	-7.61455	-0.0241588	4.87983	-0.146419	0.889808	0.950293	-7.9671	0.168606	4.80216	3.24883	0.0252652	0.201968	-4.79259	1285	881	977	944	932	845	981	962	837	8644
Akt2	ENSMUSG00000004056,15	0.00425867	5.06907	0.0633465	0.952173	0.993121	-8.3919	0.0444495	5.06097	0.523957	0.624634	0.810963	-7.83581	0.0368041	5.08346	0.482451	0.651345	0.790385	-8.03415	1211	1070	1158	1272	1121	1073	1018	1219	997	10139
Akt3	ENSMUSG00000019699,16	0.0873272	8.02769	0.94625	0.391431	0.96692	-8.19956	0.035875	7.9734	0.38544	0.717141	0.867951	-8.15883	-0.0548883	8.03809	-0.800273	0.46248	0.64434	-8.16926	7672	9480	8888	8982	9510	9197	8803	7960	7482	77974
Aktip	ENSMUSG00000031667,16	0.114973	6.39112	5.20818	0.00424313	0.803617	-3.11004	0.0569288	6.33368	1.49129	0.201234	0.408549	-7.01087	-0.0614657	6.41193	-1.62735	0.169003	0.325096	-7.06893	2686	2802	2777	3056	2989	2942	2784	2637	2411	25084
Alad	ENSMUSG00000028393,10	0.0316038	3.07239	0.184292	0.861699	0.96692	-8.11773	-0.0349061	3.0125	-0.27668	0.794061	0.916054	-7.70133	-0.0709258	3.04737	-0.402318	0.705281	0.827763	-7.74246	316	259	280	377	260	251	223	283	254	2503
Alas1	ENSMUSG00000032786,16	0.107054	5.11167	2.14762	0.089825	0.96692	-6.45756	0.0976847	5.07856	1.79246	0.13833	0.293894	-6.51892	-0.0127094	5.15282	-0.546529	0.609199	0.758281	-8.00625	1056	1207	1155	1277	1200	1215	1140	1168	1019	10437
Alas2	ENSMUSG00000025270,13	-1.36745	4.16604	-2.69208	0.0475272	0.96692	-5.63612	0.742932	5.19165	1.35995	0.236896	0.451591	-7.06418	2.10804	4.52951	3.10247	0.0295307	0.201968	-4.89885	1350	700	1008	322	730	239	797	2677	1573	9396
Alb	ENSMUSG00000029368,10	-1.03405	1.57187	-0.516022	0.629874	0.96692	-7.68669	1.2716	2.69093	0.755593	0.486873	0.705309	-7.35293	2.306	2.19471	1.53994	0.18856	0.356278	-6.42176	531	15	372	86	288	14	177	1166	153	2802
Alcam	ENSMUSG00000022636,13	0.0387661	8.86217	0.310108	0.770149	0.96692	-8.72065	-0.00519275	8.81135	-0.0388619	0.970635	0.986679	-8.30931	-0.0472522	8.85193	-0.419467	0.693553	0.819516	-8.51873	13299	16877	17172	15665	15372	17596	16350	14174	12379	138884
Aldh16a1	ENSMUSG00000007833,15	0.0486244	2.3697	0.568532	0.596526	0.96692	-7.82626	0.042211	2.33814	0.402582	0.705334	0.861175	-7.53491	-0.00981995	2.38285	-0.131215	0.901095	0.94163	-7.6848	190	157	174	190	183	167	151	183	154	1549
Aldh18a1	ENSMUSG00000025007,13	0.0641084	5.05822	1.08382	0.33241	0.96692	-7.75627	0.00048862	4.99852	0.00677492	0.994879	0.997305	-7.99185	-0.0674193	5.05121	-0.888383	0.417938	0.615431	-7.72498	1056	1089	1198	1265	1179	1068	939	1085	1020	9899
Aldh1a1	ENSMUSG00000053279,8	-0.0540382	1.38304	-0.0882921	0.93339	0.981319	-7.81383	0.286123	1.52496	0.435484	0.682944	0.848079	-7.36369	0.339625	1.51152	0.406607	0.702339	0.82576	-7.39219	122	72	85	182	92	39	68	255	57	972
Aldh1a2	ENSMUSG00000013584,5	-0.22558	5.05426	-0.397991	0.708584	0.96692	-8.29759	0.0987393	5.18845	0.136868	0.89694	0.953511	-7.99898	0.322875	5.09273	0.421442	0.692209	0.818689	-8.06731	2043	992	918	1923	1040	580	689	3103	793	12081
Aldh1a3	ENSMUSG00000015134,15	0.0114858	1.81737	0.0673338	0.949168	0.991141	-7.90599	0.0488145	1.80873	0.421161	0.692646	0.853774	-7.42662	0.0333688	1.83492	0.230023	0.827852	0.915893	-7.53652	103	119	139	141	97	129	106	122	110	1066
Aldh1a7	ENSMUSG00000024747,3	-0.145608	1.69197	-0.37746	0.722759	0.96692	-7.79752	-0.0826453	1.69353	-0.129365	0.90255	0.953511	-7.49922	0.0629602	1.63611	0.0920594	0.930486	0.956673	-7.51596	154	109	93	172	92	72	63	253	60	1068
Aldh1b1	ENSMUSG00000035561,5	0.021789	1.69312	0.181387	0.863849	0.96692	-7.86363	-0.135714	1.58656	-1.36748	0.234696	0.44823	-6.53635	-0.161239	1.61728	-2.12389	0.0912751	0.201968	-5.6078	124	100	105	123	98	114	91	94	86	935
Aldh1l1	ENSMUSG00000030088,15	-0.0014364	2.92392	-0.00910274	0.993122	0.998181	-8.11399	0.119969	2.95744	0.871944	0.426537	0.680628	-7.31135	0.11749	2.97604	0.637877	0.553645	0.715034	-7.58818	281	240	258	320	261	209	221	305	249	2344
Aldh1l2	ENSMUSG00000020256,14	-0.112606	4.33595	-1.30056	0.255269	0.96692	-7.43434	-0.0870262	4.31971	-0.744352	0.493024	0.711248	-7.60296	0.0224055	4.28456	0.177689	0.86645	0.924008	-8.0393	750	664	739	632	657	711	728	587	540	6008
Aldh2	ENSMUSG00000029455,14	-0.0365898	6.14947	-0.156493	0.882336	0.96692	-8.49397	-0.0928383	6.09355	-0.415865	0.696251	0.855563	-7.98961	-0.0597771	6.09502	-0.695516	0.519961	0.684417	-8.02283	3348	2036	2176	2781	2345	2125	2055	2254	1983	21103
Aldh3a2	ENSMUSG00000010025,19	0.139456	5.6391	1.4568	0.210405	0.96692	-7.39372	0.163736	5.62278	1.73919	0.147788	0.311755	-6.63798	0.0208183	5.7136	0.513839	0.630847	0.77448	-8.09841	1397	1727	1766	1785	1821	1776	1616	1758	1588	15234
Aldh3b1	ENSMUSG00000024885,9	-0.0296238	2.12841	-0.23167	0.82683	0.96692	-7.93801	-0.0010217	2.11433	-0.00984147	0.992561	0.996279	-7.59036	0.025241	2.11929	0.248687	0.814215	0.906309	-7.59772	167	149	137	160	159	127	147	142	122	1310
Aldh4a1	ENSMUSG00000028737,15	-0.212656	3.19426	-2.24365	0.0800502	0.96692	-6.09168	-0.00377782	3.26999	-0.0200226	0.984867	0.993055	-7.78709	0.206122	3.18362	1.02488	0.355775	0.551304	-7.29271	345	314	351	342	261	276	264	413	259	2825
Aldh5a1	ENSMUSG00000035936,6	0.0853269	3.84193	0.958938	0.385643	0.96692	-7.73889	-0.0183229	3.76209	-0.207852	0.844258	0.933868	-7.82884	-0.107231	3.82533	-1.67017	0.16018	0.310771	-6.65887	432	526	472	534	523	464	405	458	419	4233
Aldh6a1	ENSMUSG00000021238,11	0.117285	4.78235	1.12749	0.315358	0.96692	-7.6792	0.2434	4.81596	1.0357	0.351853	0.601732	-7.38747	0.123872	4.89548	0.586781	0.584688	0.74181	-7.94494	775	923	1026	1056	914	983	905	1359	742	8683
Aldh7a1	ENSMUSG00000053644,13	0.037109	5.43739	0.370722	0.727441	0.96692	-8.3516	0.00991026	5.3958	0.0887918	0.932994	0.966601	-8.02511	-0.0307064	5.43458	-0.281236	0.790617	0.890802	-8.17073	1583	1333	1479	1707	1491	1338	1219	1545	1272	12967
Aldh9a1	ENSMUSG00000026687,14	0.0963242	5.38365	1.12275	0.317174	0.96692	-7.75018	0.00651654	5.31079	0.0801561	0.939493	0.970375	-8.01802	-0.0934282	5.37947	-1.81166	0.134219	0.268003	-6.70378	1224	1491	1437	1637	1411	1403	1223	1347	1215	12388
Aldoa	ENSMUSG00000030695,16	0.0634369	9.58707	0.740667	0.495246	0.96692	-8.53177	0.0708172	9.56232	0.589823	0.583169	0.786574	-8.15873	0.00443095	9.61442	0.0504727	0.961842	0.977484	-8.70252	28584	23917	24852	29146	25672	26188	24241	28679	21269	232548
Aldoc	ENSMUSG00000017390,15	0.0833241	6.47168	1.2602	0.268254	0.96692	-7.71162	0.0314103	6.41739	0.319716	0.763234	0.89925	-8.05964	-0.0550128	6.47932	-0.593789	0.580367	0.737783	-8.14334	3104	2896	2844	3481	2988	2953	2634	3205	2428	26533
Alg1	ENSMUSG00000039427,14	0.0321483	3.73344	0.731913	0.500087	0.96692	-7.92641	-0.0210024	3.67909	-0.50166	0.638881	0.821558	-7.69543	-0.0570879	3.71572	-1.22804	0.27797	0.457781	-7.17356	427	445	476	503	444	438	416	398	394	3941
Alg10b	ENSMUSG00000075470,2	0.209521	6.80598	0.821697	0.452066	0.96692	-8.19222	0.138444	6.74183	0.566498	0.597654	0.794366	-7.96	-0.0748059	6.8683	-0.887544	0.418346	0.615827	-7.955	2449	4018	4553	3938	3950	4526	3638	3565	3477	34114
Alg11	ENSMUSG00000063362,13	0.0739887	5.60175	0.569549	0.595892	0.96692	-8.26062	0.0493078	5.56127	0.356532	0.737258	0.882216	-7.96898	-0.0286101	5.61949	-0.375716	0.723662	0.841734	-8.15779	1329	1715	1851	1704	1653	1772	1592	1436	1543	14595
Alg12	ENSMUSG00000035845,17	-0.00573913	2.97604	-0.0693689	0.947635	0.990267	-8.11973	-0.00641914	2.94781	-0.17293	0.869895	0.941232	-7.71912	-0.00437031	2.96502	-0.0563776	0.957384	0.97465	-7.82028	277	266	264	297	278	235	244	257	230	2348
Alg13	ENSMUSG00000041718,15	0.156736	3.12171	0.963531	0.383565	0.96692	-7.63104	0.161395	3.09484	0.899833	0.412977	0.668346	-7.30754	0.00193833	3.19463	0.023547	0.982191	0.990273	-7.86875	218	316	322	320	302	323	284	330	249	2664
Alg14	ENSMUSG00000039887,11	0.0379941	5.12462	0.254969	0.809845	0.96692	-8.36107	0.113884	5.13376	0.734808	0.498289	0.716056	-7.69459	0.07259	5.17413	0.894777	0.414841	0.612201	-7.73577	942	1263	1364	1185	1191	1263	1291	1159	1035	10693
Alg2	ENSMUSG00000039740,6	0.147746	7.62442	1.31799	0.249844	0.96692	-7.76107	0.0702044	7.55722	0.613189	0.568883	0.776191	-7.9954	-0.0811091	7.65214	-1.69859	0.154581	0.301279	-7.12648	5372	6896	7084	7228	6872	7281	6550	6105	5720	59108
Alg3	ENSMUSG00000033809,15	0.0169837	3.46374	0.32572	0.75905	0.96692	-8.13354	-0.0428565	3.40538	-0.810555	0.457614	0.692601	-7.43355	-0.0633866	3.43479	-0.899517	0.412558	0.609668	-7.46263	361	371	391	388	355	399	360	324	309	3258
Alg5	ENSMUSG00000036632,9	-0.0685646	4.20337	-2.83266	0.0391571	0.96692	-5.45865	0.021988	4.22006	0.31632	0.765649	0.901035	-7.84991	0.0872837	4.20642	1.31668	0.249132	0.429543	-7.15244	646	649	637	637	602	611	663	600	528	5573
Alg6	ENSMUSG00000073792,11	0.116557	3.15752	0.599604	0.577315	0.96692	-7.94066	0.136136	3.1388	0.767283	0.480537	0.699636	-7.43093	0.0162009	3.21856	0.18514	0.860925	0.919952	-7.8532	224	309	360	332	280	347	294	312	272	2730
Alg8	ENSMUSG00000035704,17	0.0286567	2.55033	0.129539	0.90245	0.96692	-8.03945	-0.103762	2.45583	-0.450088	0.673124	0.843944	-7.53187	-0.135986	2.49211	-2.09697	0.0943281	0.201968	-5.84396	141	221	247	205	195	208	156	181	166	1720
Alg9	ENSMUSG00000032059,13	0.132132	4.58338	3.13096	0.0294026	0.96692	-5.15376	0.0681348	4.52316	0.994933	0.369342	0.623607	-7.39835	-0.0676011	4.61008	-1.29127	0.257102	0.436623	-7.24143	761	742	846	890	856	836	700	808	733	7172
Alk	ENSMUSG00000055471,7	-0.0105108	1.75055	-0.106029	0.920065	0.973297	-7.88845	0.0448125	1.75011	0.563866	0.599302	0.795798	-7.33432	0.0516534	1.76536	0.670098	0.534638	0.697795	-7.29231	109	107	130	129	102	114	113	113	98	1015
Alkal2	ENSMUSG00000054204,6	0.1614	2.47855	0.556869	0.603839	0.96692	-7.85357	0.0212954	2.37846	0.101911	0.923132	0.961111	-7.63264	-0.142495	2.48071	-0.502684	0.638089	0.78067	-7.56713	141	196	209	209	145	271	197	178	129	1675
Alkbh1	ENSMUSG00000079036,10	0.00756643	3.29501	0.0830604	0.937326	0.983718	-8.1685	0.129217	3.32682	1.08364	0.332196	0.57562	-7.16044	0.11872	3.35137	1.14583	0.30742	0.494001	-7.19857	315	311	380	368	306	340	350	377	277	3024
Alkbh2	ENSMUSG00000044339,12	-0.0114622	1.62734	-0.0745895	0.943702	0.987812	-7.86654	0.223063	1.71553	2.19922	0.0840855	0.189093	-5.51163	0.231458	1.73018	1.40946	0.221972	0.399355	-6.54194	109	97	111	113	122	84	122	122	94	974
Alkbh3	ENSMUSG00000040174,14	0.096894	3.30065	0.902337	0.412017	0.96692	-7.71702	-0.0201882	3.21432	-0.274369	0.79573	0.916721	-7.73347	-0.120724	3.28249	-1.32051	0.24795	0.427903	-6.98746	341	334	302	401	348	304	287	316	273	2906
Alkbh4	ENSMUSG00000039754,10	0.0320787	2.18783	0.293743	0.781852	0.96692	-7.92993	0.00728626	2.1468	0.0591065	0.955356	0.978436	-7.5944	-0.0282555	2.184	-0.280351	0.791255	0.891341	-7.6024	172	138	152	150	163	160	126	154	142	1357
Alkbh5	ENSMUSG00000042650,3	0.108276	5.18644	1.12971	0.314514	0.96692	-7.72144	0.134398	5.17118	1.06	0.341765	0.588143	-7.39739	0.0228767	5.24588	0.181571	0.86357	0.92213	-8.17372	1076	1220	1309	1457	1153	1296	1091	1445	1084	11131
Alkbh6	ENSMUSG00000042831,13	0.0122464	3.76504	0.087087	0.934297	0.981913	-8.23459	-0.0434641	3.70846	-0.276574	0.794138	0.916067	-7.8019	-0.0588438	3.73466	-0.743753	0.492887	0.659748	-7.65214	557	425	417	503	438	464	448	432	349	4033
Alkbh7	ENSMUSG00000002661,14	-0.0604369	2.69855	-0.322123	0.761601	0.96692	-8.01334	0.153034	2.77608	0.788939	0.46896	0.692601	-7.35415	0.210467	2.76619	2.88346	0.0375371	0.201968	-4.89274	290	186	214	223	205	225	240	250	198	2031
Alkbh8	ENSMUSG00000025899,14	0.0725028	5.70596	0.546732	0.610239	0.96692	-8.28613	0.0541971	5.66813	0.450661	0.67274	0.843764	-7.93411	-0.0218033	5.72579	-0.302837	0.775096	0.88061	-8.20068	1443	1853	1962	1739	1880	1894	1737	1634	1559	15701
Alms1	ENSMUSG00000063810,7	-0.172215	3.20593	-1.28323	0.260772	0.96692	-7.30256	-0.0247368	3.25074	-0.201534	0.848914	0.933868	-7.75981	0.144371	3.18631	2.48348	0.0593202	0.201968	-5.48814	276	353	382	286	299	309	303	315	279	2802
Alox5ap	ENSMUSG00000060063,9	-0.180114	1.54919	-1.25875	0.268732	0.96692	-7.0256	0.063472	1.6432	0.203184	0.847697	0.933868	-7.4751	0.240707	1.57271	0.699327	0.517784	0.682702	-7.22418	107	106	105	108	103	74	67	152	100	922
Alpk1	ENSMUSG00000028028,11	0.171515	1.52506	1.46234	0.208962	0.96692	-6.78108	-0.117131	1.34999	-0.822944	0.451206	0.692601	-7.05752	-0.290939	1.45729	-1.91308	0.118316	0.24056	-5.84201	98	83	96	98	117	99	75	95	64	825
Alpl	ENSMUSG00000028766,10	0.024472	4.99424	0.771096	0.478507	0.96692	-8.04573	-0.0265622	4.94071	-0.780889	0.472772	0.692748	-7.6384	-0.0547723	4.97352	-1.98268	0.107647	0.222825	-6.42622	1099	1035	1105	1173	1060	1076	963	983	946	9440
Als2	ENSMUSG00000026024,14	0.0465313	5.761	1.75689	0.144192	0.96692	-7.03146	-0.0190401	5.70028	-0.437575	0.681533	0.847385	-7.94376	-0.0693864	5.7442	-1.54998	0.186203	0.352558	-7.08243	1762	1863	1844	1980	1888	1805	1624	1631	1655	16052
Alyref	ENSMUSG00000025134,2	-0.130308	4.15287	-0.648655	0.547806	0.96692	-8.04336	-0.0951828	4.14229	-0.478321	0.654353	0.832615	-7.76518	0.0314717	4.0972	0.488988	0.647045	0.78715	-7.88788	831	528	585	635	530	587	580	543	502	5321
Alyref2	ENSMUSG00000060244,1	-0.191389	1.44086	-0.926889	0.400401	0.96692	-7.35131	-0.0571353	1.48175	-0.302288	0.775661	0.906645	-7.41278	0.129731	1.40503	1.07077	0.336701	0.528415	-6.84504	125	81	95	103	85	74	83	86	90	822
Amacr	ENSMUSG00000022244,7	-0.0853445	3.71779	-1.86021	0.127557	0.96692	-6.66452	-0.0362553	3.71392	-0.621232	0.564019	0.772136	-7.62344	0.0455886	3.69193	0.994781	0.368778	0.566373	-7.41786	471	433	485	460	439	415	441	417	375	3936
Ambra1	ENSMUSG00000040506,16	0.0565255	5.56939	0.765392	0.481759	0.96692	-8.11233	-0.063139	5.48194	-0.787661	0.469637	0.692601	-7.68384	-0.123629	5.53044	-1.66946	0.160322	0.310983	-6.90509	1680	1595	1502	1827	1637	1529	1426	1323	1409	13928
Amd1	ENSMUSG00000075232,5	0.0664728	4.46631	0.235439	0.824074	0.96692	-8.29269	0.1287	4.46873	0.479431	0.653621	0.832221	-7.80133	0.0586394	4.52414	0.506077	0.635882	0.778743	-7.94275	494	836	968	703	776	857	775	701	727	6837
Amdhd2	ENSMUSG00000036820,12	-0.068776	2.63422	-0.463841	0.664059	0.96692	-7.93658	0.0746222	2.67857	0.468856	0.660613	0.835718	-7.56178	0.139382	2.66386	1.87097	0.124666	0.251398	-6.17673	263	203	191	226	199	198	192	218	214	1904
Amer1	ENSMUSG00000050332,7	0.0688494	6.12005	0.635637	0.555539	0.96692	-8.26987	-0.0176401	6.04856	-0.15691	0.881989	0.94723	-8.0741	-0.0903473	6.10418	-0.934724	0.395909	0.593281	-7.81722	2017	2531	2442	2332	2582	2423	2186	1942	2135	20590
Amer2	ENSMUSG00000021986,8	0.144132	6.913	0.965654	0.382607	0.96692	-8.06978	0.0562214	6.84076	0.345119	0.745269	0.887592	-8.08545	-0.0918267	6.93412	-0.912287	0.406455	0.60292	-7.93983	3137	4383	4361	4191	4365	4488	4030	3379	3734	36068
Amer3	ENSMUSG00000045174,10	0.00164981	5.20762	0.0300667	0.977285	0.998181	-8.40886	-0.0681399	5.14472	-0.787028	0.469973	0.692601	-7.65253	-0.0735568	5.16605	-0.912279	0.406459	0.60292	-7.7181	1303	1278	1205	1322	1290	1194	1209	1020	1063	10884
Amfr	ENSMUSG00000031751,14	0.124926	6.81049	1.42329	0.219336	0.96692	-7.55501	0.0875892	6.76378	0.952538	0.3883	0.644384	-7.64682	-0.0411659	6.8471	-1.05544	0.342973	0.535893	-7.78801	3186	3854	4029	4240	3843	3987	3503	3593	3555	33790
Amigo1	ENSMUSG00000050947,9	0.144541	5.52615	2.86203	0.039318	0.96692	-5.58727	-0.010938	5.42053	-0.108452	0.918222	0.9585	-8.02504	-0.159501	5.51363	-1.76349	0.142535	0.281148	-6.78295	1375	1567	1556	1704	1638	1643	1458	1224	1385	13550
Amigo2	ENSMUSG00000048218,6	0.0360905	4.85707	0.239602	0.821035	0.96692	-8.33615	0.00590666	4.81365	0.0397502	0.969964	0.986262	-7.97253	-0.0339353	4.85309	-0.68109	0.528257	0.69207	-7.87212	797	976	1198	1007	969	1045	881	913	885	8671
Amigo3	ENSMUSG00000032593,5	-0.170783	3.57152	-3.51664	0.0197808	0.96692	-4.57204	-0.0106703	3.62438	-0.0757384	0.94282	0.972146	-7.83356	0.155474	3.55974	1.08626	0.330465	0.521089	-7.30082	406	425	462	406	388	359	434	328	414	3622
Ammecr1	ENSMUSG00000042225,3	-0.045693	3.39808	-0.227721	0.829719	0.96692	-8.1564	0.0808989	3.43388	0.387168	0.715946	0.867425	-7.72146	0.122796	3.43144	0.629704	0.558537	0.718959	-7.68424	292	379	441	433	291	356	293	432	344	3261
Ammecr1l	ENSMUSG00000041915,9	0.126339	5.45934	1.66018	0.163411	0.96692	-7.1229	-0.00749316	5.36457	-0.0999957	0.924571	0.961928	-8.02089	-0.137678	5.44838	-2.0453	0.100497	0.209929	-6.40911	1302	1517	1506	1703	1442	1594	1246	1341	1321	12972
Amn1	ENSMUSG00000068250,13	0.0181005	4.46211	0.0882621	0.933413	0.981319	-8.32105	0.112252	4.47993	0.729263	0.501368	0.718596	-7.6329	0.0909854	4.51111	0.647624	0.547848	0.709819	-7.84849	591	796	886	648	801	849	776	737	694	6778
Amot	ENSMUSG00000041688,16	-0.0440857	4.26991	-0.32602	0.758837	0.96692	-8.23887	0.0567288	4.29138	0.298267	0.778539	0.908224	-7.86457	0.0979861	4.28978	0.659968	0.540566	0.703263	-7.80659	730	553	741	731	627	602	612	799	516	5911
Amotl1	ENSMUSG00000013076,17	-0.13415	6.74289	-1.34441	0.241829	0.96692	-7.64183	-0.0998138	6.73201	-0.771899	0.478051	0.697794	-7.8069	0.0308138	6.68533	0.313397	0.767552	0.875103	-8.31591	4295	3453	3798	3794	3516	3229	2899	3706	3205	31895
Amotl2	ENSMUSG00000032531,15	0.00853828	4.70954	0.0687498	0.948101	0.990549	-8.35137	0.111331	4.73267	0.542562	0.612746	0.804836	-7.79181	0.0998195	4.75681	0.478608	0.65388	0.792253	-7.99156	986	827	868	1077	809	834	734	1187	768	8090
Ampd1	ENSMUSG00000070385,12	-1.71953	-0.535253	-1.46492	0.208296	0.96692	-6.29595	0.349211	0.473084	0.236038	0.823581	0.932412	-7.22678	2.06638	-0.366692	1.28852	0.257977	0.436623	-6.13403	44	13	130	23	14	6	10	214	54	508
Ampd2	ENSMUSG00000027889,17	0.116569	5.35296	4.68269	0.00651672	0.96692	-3.50761	0.0267896	5.28049	0.280359	0.791408	0.914724	-7.97165	-0.0939766	5.35933	-0.968504	0.380453	0.577993	-7.68964	1317	1366	1339	1552	1424	1405	1304	1122	1313	12142
Ampd3	ENSMUSG00000005686,17	0.0302744	4.95406	0.387273	0.715967	0.96692	-8.29172	0.0276976	4.9248	0.280166	0.791547	0.914732	-7.9373	-0.00645347	4.96078	-0.0854973	0.935426	0.959946	-8.15093	959	1156	1036	1076	1063	1083	1012	910	996	9291
Amph	ENSMUSG00000021314,12	0.0326734	7.20684	0.581435	0.588501	0.96692	-8.41772	-0.0182075	7.15326	-0.21495	0.839037	0.933868	-8.1548	-0.0545814	7.19025	-0.70711	0.51336	0.67882	-8.14695	5182	5038	4758	5175	5237	4964	4901	4187	4388	43830
Amt	ENSMUSG00000032607,12	-0.389883	1.94208	-4.52153	0.0078329	0.96692	-3.21741	-0.136298	2.04107	-2.13697	0.090645	0.202662	-5.65315	0.249988	1.86595	3.72429	0.0155839	0.201968	-3.69389	157	152	141	126	117	102	122	132	118	1167
Amy1	ENSMUSG00000074264,12	-0.175359	1.7153	-0.713603	0.510321	0.96692	-7.59371	-0.221657	1.66594	-1.18199	0.294868	0.526745	-6.76284	-0.0502693	1.59712	-0.292032	0.782845	0.885583	-7.46014	100	154	109	130	111	81	90	96	92	963
Amz2	ENSMUSG00000020610,16	0.0649307	6.42307	1.8342	0.131716	0.96692	-7.00156	0.073176	6.3988	3.11621	0.0283456	0.129487	-4.92573	0.0047382	6.45217	0.113987	0.914007	0.946129	-8.33861	2817	2845	2935	2982	3069	2980	2692	2872	2667	25859
Anapc1	ENSMUSG00000014355,10	0.170118	6.69378	1.4927	0.20123	0.96692	-7.45902	0.0551176	6.60798	0.472233	0.658376	0.834771	-8.00492	-0.118576	6.71402	-4.35523	0.00865404	0.201968	-3.79398	2778	3672	3629	3856	3737	3708	3080	3324	3055	30839
Anapc10	ENSMUSG00000036977,8	-0.158301	4.34811	-1.26798	0.265702	0.96692	-7.47316	-0.0234274	4.38629	-0.272993	0.796724	0.917162	-7.88364	0.131839	4.3287	0.950349	0.388697	0.586767	-7.56425	688	724	794	601	631	762	743	654	583	6180
Anapc11	ENSMUSG00000025135,12	-0.0148166	5.33407	-0.673629	0.532279	0.96692	-8.16051	0.0283962	5.32693	0.337422	0.750693	0.891047	-7.95504	0.0402336	5.3402	0.509337	0.633764	0.776889	-8.05286	1329	1389	1438	1455	1336	1340	1328	1457	1093	12165
Anapc13	ENSMUSG00000035048,13	-0.120178	4.38215	-0.446385	0.675717	0.96692	-8.19746	-0.0174072	4.40509	-0.0636768	0.95191	0.976691	-7.92822	0.0995579	4.36477	1.32135	0.247694	0.427592	-7.17099	1081	591	641	759	664	638	699	731	579	6383
Anapc15	ENSMUSG00000030649,18	-0.129833	4.05614	-1.00242	0.366343	0.96692	-7.72335	-0.173269	4.00622	-1.38028	0.231001	0.443346	-6.91579	-0.0470185	3.96162	-0.976069	0.37706	0.575272	-7.48156	701	536	558	571	563	503	500	485	453	4870
Anapc16	ENSMUSG00000020107,10	-0.0150593	4.98527	-0.310112	0.770146	0.96692	-8.3271	0.0376195	4.98326	0.815318	0.455142	0.692601	-7.61278	0.0491882	4.9965	1.42982	0.216404	0.391996	-7.13185	1075	1026	1165	1133	1019	1092	1015	1081	953	9559
Anapc2	ENSMUSG00000026965,12	0.0315274	6.72971	0.755493	0.487127	0.96692	-8.24058	-0.0315515	6.67012	-0.728621	0.501725	0.71896	-7.83697	-0.0667692	6.70644	-1.8055	0.135253	0.269825	-6.87766	3704	3543	3514	3851	3709	3487	3252	3182	3142	31384
Anapc4	ENSMUSG00000029176,13	0.0799258	6.58591	1.11175	0.321413	0.96692	-7.88715	0.0318738	6.53355	0.39686	0.709264	0.863845	-8.03687	-0.0515999	6.59438	-1.11193	0.320354	0.509548	-7.69808	2859	3438	3306	3443	3404	3316	3191	2925	2801	28683
Anapc5	ENSMUSG00000029472,13	0.0635291	8.29497	1.76622	0.143268	0.96692	-7.27541	0.025451	8.24791	0.630399	0.558508	0.767507	-8.03676	-0.0417799	8.30026	-1.1606	0.301932	0.487696	-7.84477	10267	10875	10356	11590	10988	10482	9823	9702	9633	93716
Anapc7	ENSMUSG00000029466,11	0.0780825	4.8899	1.0453	0.348113	0.96692	-7.77771	0.0851548	4.8651	0.993419	0.370005	0.624197	-7.43503	0.00368453	4.92453	0.0477405	0.963906	0.978775	-8.14905	1056	923	982	1132	1055	953	1051	969	843	8964
Angel1	ENSMUSG00000021257,14	0.0643066	3.76299	1.30656	0.25339	0.96692	-7.35556	-0.112432	3.64741	-1.03315	0.352926	0.603103	-7.25633	-0.1813	3.70036	-1.55244	0.185631	0.351654	-6.78457	438	445	477	496	441	492	387	343	419	3938
Angel2	ENSMUSG00000026634,16	0.0193491	4.81107	0.236312	0.823437	0.96692	-8.33191	0.00891109	4.77766	0.10695	0.919349	0.959029	-7.9629	-0.0139626	4.80806	-0.58659	0.583984	0.741108	-7.9337	837	1032	999	1027	946	936	861	925	831	8394
Angpt1	ENSMUSG00000022309,9	-0.130215	3.64337	-0.952313	0.388656	0.96692	-7.71868	0.195924	3.77716	0.617996	0.565973	0.773859	-7.634	0.324071	3.73177	0.992306	0.369864	0.567556	-7.42689	486	404	453	495	398	347	377	754	351	4065
Angpt2	ENSMUSG00000031465,6	0.0970965	3.30633	0.280381	0.791458	0.96692	-8.12674	0.357837	3.40846	0.867018	0.428968	0.683273	-7.38391	0.25789	3.47534	0.722385	0.504753	0.670908	-7.62307	483	240	301	481	326	273	292	607	309	3312
Angptl1	ENSMUSG00000033544,6	-0.356805	1.53933	-0.818618	0.453653	0.96692	-7.46934	0.49913	1.94128	1.31496	0.250451	0.472578	-6.66561	0.851943	1.78168	1.75949	0.143248	0.282355	-6.11126	123	81	141	119	117	48	96	211	148	1084
Angptl2	ENSMUSG00000004105,8	-0.0999371	5.38074	-0.427261	0.68861	0.96692	-8.31897	-0.03244	5.38677	-0.101972	0.923087	0.961086	-8.02268	0.0644895	5.35602	0.188082	0.858746	0.918339	-8.18685	1762	1274	1428	1904	1191	1155	956	2022	1162	12854
Angptl4	ENSMUSG00000002289,16	0.0156737	3.19867	0.080067	0.939578	0.985231	-8.15401	0.0885741	3.20658	0.408428	0.701329	0.858893	-7.67827	0.0696804	3.23452	0.460761	0.665722	0.800014	-7.75127	376	243	331	360	273	321	272	374	268	2818
Angptl6	ENSMUSG00000038742,7	-0.179949	1.27962	-0.599323	0.577487	0.96692	-7.58578	0.0691601	1.37278	0.301916	0.775927	0.906765	-7.3914	0.246105	1.30591	1.05904	0.34149	0.534088	-6.83307	115	68	86	59	86	93	97	79	76	759
Ank	ENSMUSG00000022265,7	0.136679	6.44267	1.34093	0.242871	0.96692	-7.61528	0.0466306	6.36967	0.386979	0.716077	0.867433	-8.02739	-0.0940804	6.45904	-1.36277	0.235268	0.411262	-7.39848	2404	3003	3149	3189	3121	3076	2701	2529	2767	25939
Ank1	ENSMUSG00000031543,18	-0.0169179	7.0842	-0.206572	0.845249	0.96692	-8.5783	0.00616932	7.06766	0.0526454	0.96023	0.981111	-8.17409	0.0194355	7.07966	0.223488	0.832644	0.916155	-8.39215	5107	4619	4298	4776	4607	4498	4805	3931	4091	40732
Ank2	ENSMUSG00000032826,18	-0.271596	9.99736	-1.56714	0.183446	0.96692	-7.68844	-0.158113	10.0256	-0.784859	0.471125	0.692601	-8.04189	0.109789	9.91078	0.435828	0.682456	0.811736	-8.62135	41010	38182	36033	28840	39820	28305	40837	25339	29545	307911
Ank3	ENSMUSG00000069601,14	-0.0210308	8.91581	-0.291894	0.783179	0.96692	-8.73235	-0.0442496	8.87571	-0.271787	0.797595	0.917626	-8.27023	-0.0267727	8.88606	-0.157783	0.881252	0.932576	-8.61226	17258	16424	16189	15894	17506	15988	18607	12688	13339	143893
Ankfy1	ENSMUSG00000020790,14	0.128807	6.84272	1.47683	0.205236	0.96692	-7.49352	0.0592041	6.77952	0.739794	0.495534	0.713361	-7.83728	-0.0731954	6.86498	-1.85116	0.127776	0.256606	-6.83782	3285	3942	4067	4093	4241	4020	3623	3612	3429	34312
Ankhd1	ENSMUSG00000024483,19	-0.0377291	5.69254	-0.460437	0.666324	0.96692	-8.3349	-0.0120659	5.67673	-0.155928	0.88272	0.947339	-8.04101	0.0225623	5.67847	0.319578	0.76315	0.872036	-8.1885	1890	1806	1679	1764	1862	1632	1702	1720	1434	15489
Ankib1	ENSMUSG00000040351,11	0.172424	6.25704	1.50413	0.198394	0.96692	-7.40037	0.0791606	6.18196	0.751928	0.488872	0.706913	-7.77638	-0.0969244	6.28941	-1.1778	0.29565	0.479994	-7.58921	2113	2678	2630	2663	2743	2958	2498	2276	2326	22885
Ankle2	ENSMUSG00000029501,14	0.104598	5.01877	0.957976	0.386079	0.96692	-7.87925	0.0415979	4.95853	0.405466	0.703358	0.860151	-7.88973	-0.0662254	5.03197	-1.05269	0.344109	0.537253	-7.56156	913	1134	1174	1150	1092	1220	1023	1076	906	9688
Ankmy2	ENSMUSG00000036188,4	0.0936284	5.33788	2.00542	0.10674	0.96692	-6.66683	0.0456937	5.28565	1.01734	0.35964	0.61177	-7.45185	-0.0514874	5.35328	-3.37454	0.0207171	0.201968	-4.67751	1235	1388	1394	1477	1433	1389	1268	1296	1204	12084
Ankra2	ENSMUSG00000021661,16	0.0869371	5.30902	1.23212	0.27765	0.96692	-7.62189	0.00907364	5.24158	0.156656	0.882178	0.94723	-8.00046	-0.0812941	5.30609	-1.99445	0.106988	0.221711	-6.45707	1192	1388	1369	1380	1389	1435	1224	1241	1144	11762
Ankrd10	ENSMUSG00000031508,14	0.0390964	4.84992	0.31724	0.76507	0.96692	-8.30945	-0.0174523	4.79323	-0.147524	0.888984	0.949826	-7.95819	-0.0599449	4.83371	-1.73053	0.148526	0.291238	-6.73487	834	1136	967	996	992	1019	883	901	836	8564
Ankrd11	ENSMUSG00000035569,17	0.00267955	7.73248	0.0154429	0.988332	0.998181	-8.66866	-0.102545	7.65177	-0.539626	0.614613	0.805396	-8.05085	-0.108642	7.67326	-1.07842	0.333609	0.524719	-7.86145	9120	6666	6296	7773	7502	6665	7099	5807	5637	62565
Ankrd12	ENSMUSG00000034647,15	-0.0268711	6.7246	-0.266512	0.801475	0.96692	-8.52486	-0.00120214	6.70848	-0.00824025	0.993772	0.99668	-8.14586	0.022391	6.71633	0.135905	0.897585	0.940943	-8.36749	3365	3810	3776	3295	3881	3632	4127	3027	2908	31821
Ankrd13a	ENSMUSG00000041870,16	0.0397921	5.98663	0.62563	0.561532	0.96692	-8.26313	0.000804591	5.9393	0.0236166	0.982146	0.992158	-8.07904	-0.0426913	5.97945	-0.736548	0.496865	0.663547	-7.9763	2189	2127	2095	2479	2126	2031	1999	1968	1869	18883
Ankrd13b	ENSMUSG00000037907,16	0.000283387	7.27609	0.00262882	0.998014	0.998679	-8.62343	-0.0333956	7.23149	-0.2295	0.828364	0.933868	-8.15725	-0.0376301	7.25199	-0.355164	0.738012	0.852685	-8.36711	6030	5140	4790	5547	5382	5029	5161	4182	4833	46094
Ankrd13c	ENSMUSG00000039988,14	0.00919472	6.28517	0.0532947	0.959753	0.997806	-8.52112	0.0150844	6.25926	0.0975413	0.926416	0.962841	-8.10172	0.00246768	6.28539	0.0244649	0.981497	0.989965	-8.3256	2114	2815	3140	2534	2560	2982	2651	2443	2243	23482
Ankrd13d	ENSMUSG00000005986,16	-0.00682303	5.6966	-0.0760714	0.942586	0.987278	-8.45809	-0.0720758	5.63583	-0.72443	0.504061	0.721228	-7.74965	-0.0688853	5.65291	-0.865361	0.429239	0.625853	-7.8249	1947	1730	1662	1827	1857	1645	1688	1460	1471	15287
Ankrd16	ENSMUSG00000047909,11	-0.0202822	3.58812	-0.129966	0.902131	0.96692	-8.20473	-0.111806	3.51579	-0.693023	0.521819	0.737189	-7.54425	-0.0960939	3.52535	-0.801386	0.461895	0.64434	-7.56678	384	499	369	477	384	373	342	327	378	3533
Ankrd17	ENSMUSG00000055204,15	0.00411642	7.83047	0.0515555	0.961065	0.998181	-8.67686	-0.000381305	7.79978	-0.00408162	0.996915	0.998486	-8.23436	-0.00772416	7.82235	-0.0970198	0.926754	0.954458	-8.50343	8408	7512	7413	8116	8149	7221	7860	7165	6243	68087
Ankrd24	ENSMUSG00000054708,17	-0.261966	3.95308	-1.07203	0.33715	0.96692	-7.63872	-0.243437	3.93479	-0.931701	0.397908	0.654083	-7.39211	0.0146163	3.82323	0.11504	0.913217	0.945628	-7.97672	778	563	444	538	485	435	520	398	425	4586
Ankrd26	ENSMUSG00000007827,10	-0.0852418	4.77091	-1.71327	0.152986	0.96692	-6.98061	-0.0548403	4.75726	-0.465683	0.66272	0.836704	-7.83879	0.027216	4.73557	0.214146	0.839509	0.916155	-8.09655	957	952	971	897	878	953	1016	804	726	8154
Ankrd27	ENSMUSG00000034867,16	0.0811264	4.04905	1.22064	0.281575	0.96692	-7.49032	0.00849936	3.98491	0.122377	0.907781	0.954951	-7.87359	-0.0763505	4.04567	-1.30023	0.254264	0.436623	-7.14587	583	539	528	643	561	550	478	538	494	4914
Ankrd28	ENSMUSG00000014496,8	0.141111	5.77075	0.731846	0.500124	0.96692	-8.16073	0.0655917	5.70457	0.336169	0.751578	0.891497	-7.99041	-0.0791964	5.79662	-0.85943	0.43219	0.628971	-7.8485	1334	1993	2102	1894	1919	2094	1555	1803	1724	16418
Ankrd29	ENSMUSG00000057766,14	0.0533563	6.13171	0.336179	0.751651	0.96692	-8.43896	0.0772703	6.11499	0.480183	0.653125	0.831883	-7.95804	0.0202998	6.16318	0.222321	0.8335	0.916155	-8.281	1882	2451	2812	2334	2473	2550	2510	2158	2120	21290
Ankrd34a	ENSMUSG00000049097,9	-0.0905509	2.40995	-0.476354	0.65577	0.96692	-7.88895	-0.17235	2.33927	-1.18283	0.294567	0.526342	-6.88927	-0.0849723	2.31626	-0.645558	0.549074	0.710984	-7.43767	210	151	205	153	181	198	155	154	143	1550
Ankrd34b	ENSMUSG00000045034,12	-0.176104	2.38884	-1.65421	0.164628	0.96692	-6.7146	-0.22522	2.33718	-1.31144	0.251541	0.474	-6.74311	-0.0537084	2.27044	-0.352492	0.739887	0.854072	-7.59507	163	208	201	168	162	176	164	123	160	1525
Ankrd34c	ENSMUSG00000047606,4	-0.0467905	3.69372	-0.277244	0.79372	0.96692	-8.18314	-0.162298	3.60677	-1.19927	0.288713	0.517834	-7.0735	-0.11861	3.60482	-0.61617	0.5667	0.726315	-7.72453	415	428	508	426	366	533	439	351	314	3780
Ankrd35	ENSMUSG00000038354,13	-0.080721	1.21504	-0.229957	0.828083	0.96692	-7.75074	0.0787489	1.26716	0.22326	0.832936	0.933868	-7.39479	0.1559	1.24506	2.01797	0.103931	0.216152	-5.65828	133	67	60	85	72	74	72	86	76	725
Ankrd37	ENSMUSG00000050914,16	0.110252	2.26667	0.487944	0.648143	0.96692	-7.8555	0.35254	2.35617	0.893922	0.415822	0.671208	-7.1871	0.241678	2.43001	0.72723	0.502045	0.66867	-7.40237	211	147	127	197	155	163	206	269	109	1584
Ankrd39	ENSMUSG00000079610,9	0.0226655	1.99093	0.13161	0.900901	0.96692	-7.93295	-0.00626405	1.94758	-0.038956	0.970564	0.986673	-7.55795	-0.0325487	1.98061	-0.292095	0.7828	0.885573	-7.55115	157	109	141	125	148	139	113	128	124	1184
Ankrd40	ENSMUSG00000020864,13	0.0581584	6.8708	1.88831	0.123218	0.96692	-6.97738	-0.0384898	6.79413	-1.67482	0.158114	0.330548	-6.82037	-0.100186	6.84403	-2.65018	0.0488739	0.201968	-5.79605	3821	3908	4026	4152	3954	4185	3625	3492	3300	34463
Ankrd42	ENSMUSG00000041343,19	-0.0779831	3.54901	-1.00342	0.365909	0.96692	-7.65533	-0.120843	3.49871	-1.26528	0.266265	0.485976	-6.9848	-0.0460149	3.48039	-0.611755	0.569379	0.728365	-7.70539	444	402	387	388	402	381	383	345	305	3437
Ankrd44	ENSMUSG00000052331,14	-0.0214281	3.88227	-0.128963	0.902881	0.96692	-8.24443	-0.0306228	3.84912	-0.163823	0.876845	0.944584	-7.84966	-0.0125795	3.85991	-0.130628	0.901534	0.941778	-7.98045	397	532	616	504	484	518	404	519	439	4413
Ankrd45	ENSMUSG00000044835,15	0.0561682	4.55038	0.607058	0.572766	0.96692	-8.12006	-0.11772	4.43465	-1.68267	0.158549	0.331307	-6.59287	-0.17731	4.48412	-1.9416	0.114208	0.234762	-6.41236	740	755	863	772	806	884	713	646	617	6796
Ankrd46	ENSMUSG00000048307,8	0.0805695	7.13605	0.521186	0.626546	0.96692	-8.44857	0.0861648	7.11042	0.581273	0.588453	0.790387	-7.98091	0.00191179	7.17195	0.0308952	0.976636	0.987149	-8.43269	3714	5269	5206	4847	4838	5211	4672	4458	4411	42626
Ankrd49	ENSMUSG00000031931,4	0.0499858	3.95032	0.27264	0.797044	0.96692	-8.21845	-0.0537062	3.87026	-0.308918	0.770924	0.904182	-7.81108	-0.107396	3.91668	-1.20852	0.284723	0.46599	-7.22915	401	610	569	523	509	589	459	445	460	4565
Ankrd50	ENSMUSG00000044864,16	0.144863	6.79309	3.51453	0.0198223	0.96692	-4.93391	0.056237	6.7207	1.47688	0.204876	0.414927	-7.06138	-0.0923053	6.81379	-3.74168	0.0152021	0.201968	-4.46659	3367	3695	3758	4273	3840	3897	3434	3482	3310	33056
Ankrd52	ENSMUSG00000014498,9	0.0184517	6.12125	0.687246	0.525055	0.96692	-8.23234	-0.0769211	6.046	-0.770853	0.478614	0.698413	-7.74877	-0.0996007	6.07575	-0.967871	0.380738	0.578308	-7.7816	2374	2353	2361	2571	2352	2292	2143	1827	2165	20438
Ankrd54	ENSMUSG00000033055,12	0.0378882	2.75546	0.400784	0.706666	0.96692	-7.98951	-0.0386548	2.68928	-0.435085	0.683213	0.848201	-7.58096	-0.0802859	2.72829	-1.51999	0.193329	0.363927	-6.63448	253	209	222	257	216	231	197	214	193	1992
Ankrd55	ENSMUSG00000049985,15	-0.0483557	3.22432	-0.574879	0.59257	0.96692	-7.96753	0.0574166	3.24856	0.850123	0.437389	0.692091	-7.37621	0.10254	3.24513	1.82977	0.131224	0.262705	-6.35017	323	348	303	310	333	302	320	314	287	2840
Ankrd6	ENSMUSG00000040183,13	0.0804784	5.44289	0.913751	0.406583	0.96692	-7.96748	0.00804521	5.37858	0.0750987	0.943302	0.972318	-8.02486	-0.0763111	5.43979	-0.754019	0.487257	0.654425	-7.89329	1296	1555	1495	1519	1633	1455	1440	1207	1329	12929
Ankrd9	ENSMUSG00000037904,14	-0.10258	1.9262	-1.38492	0.230015	0.96692	-6.95597	0.0879809	1.99385	0.797573	0.464403	0.692601	-7.20613	0.186342	1.96322	2.02288	0.103306	0.215037	-5.82164	146	124	133	128	121	127	140	118	132	1169
Anks1	ENSMUSG00000024219,16	0.0514793	5.68627	0.786195	0.470623	0.96692	-8.10728	-0.0296369	5.61795	-0.500874	0.639567	0.822157	-7.90177	-0.0849899	5.66404	-1.53894	0.188796	0.356665	-7.08587	1828	1633	1728	1981	1756	1668	1542	1540	1538	15214
Anks1b	ENSMUSG00000058589,14	-0.0258635	5.19913	-0.234876	0.824486	0.96692	-8.37507	-0.00915978	5.17879	-0.0852449	0.935663	0.968163	-8.00492	0.0131949	5.18726	0.128494	0.903132	0.942173	-8.17588	1106	1320	1387	1167	1276	1308	1275	1084	1083	11006
Anks3	ENSMUSG00000022515,6	0.0206865	3.96024	0.247849	0.815023	0.96692	-8.22749	0.0351612	3.93953	0.366139	0.730544	0.877456	-7.79686	0.0107188	3.97001	0.138966	0.895296	0.939676	-7.99735	575	514	497	590	527	498	546	474	459	4680
Anks6	ENSMUSG00000066191,12	-0.0652369	2.86189	-0.850446	0.437453	0.96692	-7.69484	-0.110951	2.81226	-1.46302	0.208439	0.421135	-6.64707	-0.0502319	2.79967	-0.483376	0.650735	0.790165	-7.64881	259	250	252	275	216	242	209	206	227	2136
Ankzf1	ENSMUSG00000026199,17	-0.081214	3.46459	-0.568162	0.596758	0.96692	-8.00753	-0.0358167	3.45896	-0.246326	0.816074	0.927774	-7.7778	0.0421009	3.43805	0.636462	0.55449	0.715926	-7.68057	434	413	325	405	359	341	368	362	304	3311
Anln	ENSMUSG00000036777,8	0.144089	4.74809	0.788026	0.469652	0.96692	-8.0038	0.0991983	4.69838	0.549229	0.608519	0.801823	-7.78417	-0.048995	4.79073	-0.276411	0.7941	0.893203	-8.08582	728	868	1053	1202	924	817	719	982	874	8167
Ano1	ENSMUSG00000031075,18	0.145059	2.23697	0.748556	0.490914	0.96692	-7.66931	0.233375	2.2517	0.570442	0.595189	0.793497	-7.42502	0.0867139	2.34289	0.211859	0.841191	0.916155	-7.65931	178	132	152	220	151	146	117	297	124	1517
Ano10	ENSMUSG00000037949,8	0.0792454	5.97089	3.23996	0.0256307	0.96692	-5.15995	0.0207861	5.91357	0.902961	0.409863	0.665028	-7.62228	-0.0620961	5.97376	-2.69582	0.0454382	0.201968	-5.62219	2102	2073	2078	2336	2186	2115	1958	1950	1864	18662
Ano2	ENSMUSG00000038115,16	-0.217543	1.33214	-0.585908	0.585734	0.96692	-7.60582	-0.261911	1.27809	-1.16462	0.301173	0.535201	-6.70433	-0.0464946	1.191	-0.105819	0.92014	0.950086	-7.40597	95	85	97	77	50	131	94	73	49	751
Ano3	ENSMUSG00000074968,11	-0.0369885	6.44079	-0.22038	0.835101	0.96692	-8.50941	0.029001	6.44497	0.147519	0.888988	0.949826	-8.11032	0.0624449	6.44798	0.329427	0.756157	0.866419	-8.28088	2491	3446	3157	2614	3257	2993	3480	2396	2601	26435
Ano4	ENSMUSG00000035189,16	-0.0173499	5.88861	-0.215836	0.838436	0.96692	-8.45349	-0.0181371	5.8597	-0.11879	0.910469	0.95571	-8.06369	-0.00435215	5.87207	-0.0279459	0.978865	0.988538	-8.27392	1883	2176	2057	1940	2129	1995	2264	1598	1689	17731
Ano5	ENSMUSG00000055489,8	-0.159731	1.18385	-0.944569	0.392203	0.96692	-7.27995	0.0482614	1.25726	0.319041	0.763714	0.899498	-7.3617	0.205153	1.2	1.55644	0.184703	0.350267	-6.23602	76	71	100	68	69	84	82	84	65	699
Ano6	ENSMUSG00000064210,7	0.034518	6.98108	1.37128	0.233538	0.96692	-7.63446	0.0194616	6.94529	0.768917	0.478865	0.698468	-7.82819	-0.0185567	6.98325	-0.579942	0.588925	0.744468	-8.21356	4155	4277	4362	4555	4440	4168	3866	4175	3764	37762
Ano8	ENSMUSG00000034863,9	0.0172394	4.86155	0.144024	0.891629	0.96692	-8.35881	-0.173964	4.73821	-1.28179	0.260909	0.479708	-7.1114	-0.195069	4.76689	-2.38071	0.0669787	0.201968	-5.87952	1130	974	874	1099	966	948	875	742	776	8384
Anp32a	ENSMUSG00000032249,14	-0.122206	6.4319	-0.740817	0.495164	0.96692	-8.22208	-0.0555115	6.43675	-0.309249	0.770688	0.904095	-8.06517	0.0637379	6.39575	0.654496	0.543786	0.706163	-8.09079	3822	2702	2823	3126	2826	2584	2834	3035	2265	26017
Anp32b	ENSMUSG00000028333,10	-0.293293	6.08392	-0.896782	0.414682	0.96692	-8.05045	-0.177428	6.11393	-0.562614	0.600087	0.796303	-7.90834	0.112571	5.98667	0.817457	0.453519	0.640993	-7.9098	3947	1956	2191	2567	2000	1802	2280	2181	1763	20687
Anp32e	ENSMUSG00000015749,12	-0.0567796	6.27045	-0.659857	0.54121	0.96692	-8.2679	-0.0332744	6.25393	-0.382214	0.719373	0.869564	-8.01949	0.019865	6.24652	0.460102	0.666162	0.800404	-8.19549	2373	2717	3014	2688	2460	2646	2315	2534	2329	23076
Anpep	ENSMUSG00000039062,15	0.0787007	4.41946	0.241833	0.819407	0.96692	-8.28536	0.123636	4.41377	0.268664	0.799854	0.918387	-7.88816	0.0424883	4.47179	0.0903311	0.931787	0.957585	-8.08152	948	562	677	1103	694	557	472	1308	564	6885
Antxr1	ENSMUSG00000033420,12	0.119043	5.55756	1.13468	0.312626	0.96692	-7.75584	0.230115	5.58468	0.779907	0.473763	0.693614	-7.6999	0.108238	5.66446	0.364431	0.731525	0.847552	-8.16861	1554	1417	1671	1978	1620	1486	1201	2532	1466	14925
Antxr2	ENSMUSG00000029338,13	0.110329	8.28664	1.09996	0.326017	0.96692	-8.06904	0.0765134	8.24135	0.632313	0.557361	0.766596	-8.03492	-0.0375225	8.31756	-0.431347	0.685486	0.814191	-8.45428	8823	11119	11023	11078	10874	11445	11051	9211	9384	94008
Anxa1	ENSMUSG00000024659,15	0.0259341	3.45257	0.0905466	0.931695	0.980232	-8.19081	0.537664	3.67927	1.02803	0.355088	0.605753	-7.26477	0.510033	3.71167	0.892177	0.416098	0.613544	-7.51813	425	337	355	453	477	250	289	1022	393	4001
Anxa11	ENSMUSG00000021866,15	-0.0497474	1.39069	-0.307602	0.771937	0.96692	-7.76322	-0.0373222	1.37001	-0.131114	0.901242	0.953511	-7.43494	0.00879417	1.3649	0.0299974	0.977314	0.987565	-7.45493	85	82	107	109	84	74	56	113	82	792
Anxa2	ENSMUSG00000032231,14	0.0590592	9.79792	0.563247	0.599834	0.96692	-8.68043	0.0677102	9.77405	0.617993	0.565975	0.773859	-8.15385	0.00543163	9.82388	0.106566	0.919579	0.949771	-8.71866	34065	27869	27877	33815	30379	29432	30277	29612	25541	268867
Anxa3	ENSMUSG00000029484,12	-0.175259	3.96718	-0.650043	0.546986	0.96692	-8.01901	0.265492	4.15936	0.550159	0.607931	0.801465	-7.72489	0.438488	4.0901	0.844106	0.439885	0.631883	-7.62515	664	566	488	723	472	374	392	1239	489	5407
Anxa4	ENSMUSG00000029994,17	-0.113134	2.81078	-1.07995	0.333958	0.96692	-7.46252	0.263369	2.97	0.891962	0.416769	0.672306	-7.29493	0.374297	2.93324	1.22534	0.278896	0.458672	-7.02601	252	231	265	276	210	212	209	426	224	2305
Anxa5	ENSMUSG00000027712,13	0.0522405	9.13664	1.39307	0.227706	0.96692	-7.81939	0.0421659	9.10333	0.691988	0.522411	0.737819	-8.05381	-0.0134778	9.15002	-0.244573	0.817215	0.90834	-8.61942	18945	19334	18386	20569	19684	18756	19389	17583	16221	168867
Anxa6	ENSMUSG00000018340,13	0.0467456	9.26955	0.500324	0.640051	0.96692	-8.66894	-0.00676328	9.21481	-0.0657483	0.950348	0.975865	-8.33622	-0.0570588	9.25851	-0.94682	0.390316	0.588541	-8.16903	23252	19844	19362	23170	21220	20236	20364	18160	17921	183529
Anxa7	ENSMUSG00000021814,17	-0.025068	6.75816	-0.786375	0.470528	0.96692	-8.2178	0.0159063	6.7502	0.260523	0.805753	0.921831	-8.10842	0.0375669	6.75846	0.686861	0.524927	0.689009	-8.11092	3523	3816	3858	3778	3665	3600	3767	3434	3118	32559
Anxa8	ENSMUSG00000021950,15	-0.268287	0.0354684	-0.389224	0.714621	0.96692	-7.43271	0.307249	0.296869	0.414762	0.697003	0.856203	-7.12168	0.573899	0.176016	0.723407	0.504181	0.670517	-6.86377	73	28	27	56	39	14	22	100	35	394
Aoc3	ENSMUSG00000019326,14	0.272746	2.89686	2.33744	0.0716116	0.96692	-5.92218	0.414722	2.93845	1.51318	0.195822	0.398933	-6.60643	0.139757	3.09548	0.5446	0.611124	0.759828	-7.67508	198	252	247	307	249	288	222	416	237	2416
Aopep	ENSMUSG00000021458,17	0.0887015	5.89089	0.676757	0.531362	0.96692	-8.21599	0.0381927	5.83733	0.27737	0.793563	0.91573	-8.02389	-0.0541391	5.90269	-0.730253	0.50036	0.667131	-7.97166	1637	2269	2042	2087	2184	2028	2002	1748	1768	17765
Aox1	ENSMUSG00000063558,4	-0.221445	2.67524	-1.74757	0.146616	0.96692	-6.64785	-0.0703878	2.72179	-0.533644	0.618427	0.80723	-7.53126	0.148127	2.63204	2.17688	0.0855728	0.201968	-5.77169	197	268	246	210	189	209	207	226	180	1932
Ap1ar	ENSMUSG00000074238,6	-0.105245	6.7131	-0.959369	0.385447	0.96692	-8.05568	-0.0846524	6.69527	-0.651657	0.545864	0.757152	-7.89757	0.0169856	6.66307	0.217985	0.836685	0.916155	-8.34351	4290	3447	3474	3613	3507	3293	3567	3009	3019	31219
Ap1b1	ENSMUSG00000009090,17	0.0819972	6.87454	1.33589	0.244387	0.96692	-7.66519	-0.0456494	6.7828	-0.740207	0.495306	0.71315	-7.83715	-0.13138	6.84421	-2.93106	0.0356068	0.201968	-5.44061	4150	3776	3775	4443	4116	3878	3523	3397	3384	34442
Ap1g1	ENSMUSG00000031731,16	0.123422	7.10682	1.27855	0.262274	0.96692	-7.75501	0.0503704	7.04215	0.477807	0.654692	0.832758	-8.03811	-0.0768824	7.12484	-1.31745	0.248894	0.429212	-7.53197	3892	4951	4761	4948	4918	4938	4375	4091	4291	41165
Ap1m1	ENSMUSG00000003033,15	0.00807533	6.91329	0.105399	0.920538	0.97363	-8.5802	-0.0553949	6.85369	-0.649308	0.547252	0.758293	-7.91259	-0.0672281	6.87806	-1.25908	0.267539	0.445246	-7.56981	4425	4110	3808	4443	4077	3929	3747	3473	3570	35582
Ap1s1	ENSMUSG00000004849,14	-0.130036	5.33481	-0.730634	0.500797	0.96692	-8.11546	-0.149041	5.29709	-0.858296	0.4333	0.687934	-7.60479	-0.0224921	5.25244	-0.421522	0.692155	0.81866	-8.0886	1825	1230	1336	1368	1388	1218	1166	1246	1138	11915
Ap1s2	ENSMUSG00000031367,15	-0.0498905	7.12508	-0.250649	0.812985	0.96692	-8.57026	0.0696725	7.15581	0.381781	0.719672	0.869744	-8.0957	0.116247	7.15253	0.891384	0.416483	0.613931	-7.9856	3733	5393	5660	4282	4594	5306	5246	4547	4159	42920
Ap2a1	ENSMUSG00000060279,14	0.0752182	7.27289	1.73884	0.148211	0.96692	-7.20962	-0.0681655	7.1735	-0.847134	0.438893	0.692601	-7.77863	-0.147416	7.23159	-1.93046	0.115794	0.236612	-6.77842	5305	5146	4996	5783	5399	5165	4462	4244	4711	45211
Ap2a2	ENSMUSG00000002957,11	0.125626	7.92732	3.48673	0.0203809	0.96692	-5.07877	0.024438	7.84881	0.378686	0.721818	0.871424	-8.15225	-0.105097	7.93227	-1.72923	0.14877	0.291653	-7.11952	7514	8223	8166	9222	8614	8346	7680	7007	7434	72206
Ap2b1	ENSMUSG00000035152,14	0.187741	8.69984	2.73254	0.0454106	0.96692	-6.06815	0.0597014	8.60771	0.795038	0.465737	0.692601	-7.93504	-0.1318	8.72238	-3.87745	0.0134379	0.201968	-4.53676	11906	14271	13874	15768	15012	14899	12739	12557	12571	123597
Ap2m1	ENSMUSG00000022841,15	0.00772036	7.60987	0.0505715	0.961807	0.998181	-8.65514	0.00559206	7.58049	0.0330754	0.975006	0.988833	-8.2165	-0.00542179	7.60466	-0.0689808	0.947873	0.968307	-8.48114	8195	6035	5964	7007	6792	6364	6893	5961	5456	58667
Ap2s1	ENSMUSG00000008036,11	0.0134749	6.59858	0.0986117	0.925634	0.976617	-8.54906	0.013612	6.57038	0.104523	0.921171	0.95992	-8.12758	-0.00322043	6.59747	-0.0646832	0.951115	0.970459	-8.36168	3916	3075	2972	3459	3488	3083	3142	3116	2826	29077
Ap3b1	ENSMUSG00000021686,6	0.0590391	5.99288	1.91702	0.118941	0.96692	-6.85041	-0.0184976	5.92562	-0.391142	0.713203	0.865942	-7.98657	-0.0807935	5.97582	-2.3414	0.0701904	0.201968	-6.08931	2055	2213	2128	2312	2201	2176	1990	2036	1728	18839
Ap3b2	ENSMUSG00000062444,15	-0.00747711	7.40026	-0.0805737	0.939197	0.985048	-8.63189	-0.100543	7.32585	-0.734743	0.498325	0.716056	-7.88612	-0.0970021	7.3426	-0.807243	0.458829	0.64434	-8.08292	6406	5574	5425	5971	6027	5359	5541	4314	4952	49569
Ap3d1	ENSMUSG00000020198,8	-0.0168536	7.84535	-0.129068	0.902802	0.96692	-8.6698	-0.129532	7.76125	-0.890261	0.417592	0.673118	-7.78634	-0.116433	7.77297	-1.33864	0.242434	0.421451	-7.58287	9261	7601	7017	8534	7787	7247	7197	6085	6483	67212
Ap3m1	ENSMUSG00000021824,13	0.138572	5.85533	0.601196	0.576341	0.96692	-8.26625	0.135475	5.82516	0.613794	0.568517	0.77592	-7.84896	-0.0066296	5.91603	-0.0961234	0.927428	0.954808	-8.27432	1338	2164	2307	2009	2008	2244	1904	1940	1808	17722
Ap3m2	ENSMUSG00000031539,6	0.100329	5.53249	1.91129	0.119784	0.96692	-6.80952	0.0610749	5.48468	1.03902	0.350459	0.599846	-7.44842	-0.0430232	5.55585	-0.78705	0.469465	0.64434	-7.88097	1418	1545	1623	1637	1622	1672	1420	1456	1472	13865
Ap3s1	ENSMUSG00000024480,9	-0.0799268	5.05367	-1.19113	0.291907	0.96692	-7.63997	-0.0656532	5.03235	-1.25459	0.269787	0.490983	-7.17205	0.010775	5.01345	0.215959	0.838175	0.916155	-8.13437	1073	1225	1205	1079	1120	1125	1043	1019	979	9868
Ap3s2	ENSMUSG00000063801,7	-0.000591068	6.37754	-0.0162907	0.987691	0.998181	-8.53219	-0.035845	6.33174	-0.933389	0.397123	0.653495	-7.6284	-0.0389988	6.35231	-0.868473	0.427698	0.624032	-7.90975	2723	2823	2980	2891	2921	2744	2560	2499	2504	24645
Ap4e1	ENSMUSG00000001998,15	0.156393	4.72684	1.16793	0.300266	0.96692	-7.62904	0.0907881	4.66592	0.622077	0.563509	0.771553	-7.73251	-0.0695559	4.76551	-0.667569	0.536114	0.699031	-7.86991	706	937	948	914	975	989	868	761	866	7964
Ap4m1	ENSMUSG00000019518,11	0.0340861	4.2261	0.680763	0.529045	0.96692	-8.02871	-0.0667786	4.14815	-0.665853	0.537529	0.750159	-7.64432	-0.104906	4.18564	-1.00892	0.362619	0.559446	-7.48415	646	607	642	704	649	598	486	582	584	5498
Ap4s1	ENSMUSG00000020955,9	0.110949	4.16028	1.14149	0.310061	0.96692	-7.59125	0.139564	4.14579	1.24462	0.273113	0.495945	-7.0901	0.0254259	4.2224	0.362342	0.732986	0.848754	-7.97034	505	633	633	634	635	642	653	597	522	5454
Ap5b1	ENSMUSG00000049562,6	-0.126389	2.44632	-1.37596	0.232581	0.96692	-7.06626	-0.152449	2.40699	-0.995307	0.369178	0.623607	-7.09842	-0.03089	2.36403	-0.222491	0.833376	0.916155	-7.66102	187	216	181	190	165	181	158	140	182	1600
Ap5m1	ENSMUSG00000036291,6	0.049771	4.57453	0.18094	0.864181	0.96692	-8.31891	0.0763991	4.55981	0.27567	0.79479	0.916373	-7.90152	0.0227114	4.60626	0.269276	0.79926	0.896282	-8.06222	528	992	974	827	788	882	738	762	804	7295
Ap5s1	ENSMUSG00000068264,11	0.074848	2.88723	1.03967	0.350462	0.96692	-7.51716	0.0949897	2.86826	1.01956	0.358689	0.610507	-7.15503	0.0172944	2.92635	0.26721	0.800756	0.89717	-7.77122	232	270	237	266	251	263	239	269	211	2238
Ap5z1	ENSMUSG00000039623,13	-0.00306414	3.54282	-0.0488097	0.963136	0.998181	-8.20731	-0.133475	3.45017	-1.95017	0.113849	0.250324	-6.12983	-0.134611	3.46909	-1.70798	0.152775	0.298297	-6.54783	373	399	424	443	391	366	350	313	329	3388
Apaf1	ENSMUSG00000019979,12	0.204848	4.3799	2.27172	0.0774162	0.96692	-6.21345	0.186479	4.34257	1.84431	0.129725	0.278199	-6.37682	-0.0217461	4.46544	-0.241233	0.819652	0.910193	-8.05023	589	700	704	867	718	722	648	787	631	6366
Apba1	ENSMUSG00000024897,9	0.0921333	8.27694	2.36312	0.069474	0.96692	-6.50027	-0.0363502	8.1846	-0.423097	0.691331	0.85279	-8.15702	-0.132368	8.25148	-1.45181	0.210539	0.390365	-7.50194	10355	10266	10165	10921	11157	10876	9834	8302	9247	91123
Apba2	ENSMUSG00000030519,14	0.0127454	6.58498	0.143386	0.892105	0.96692	-8.54108	-0.0780492	6.51162	-0.585438	0.585875	0.78871	-7.928	-0.0946952	6.53857	-0.783511	0.471348	0.64434	-8.00676	3537	3259	3019	3327	3478	3124	3173	2472	2841	28230
Apba3	ENSMUSG00000004931,11	0.0173663	3.51427	0.180425	0.864562	0.96692	-8.185	-0.0195313	3.46764	-0.15795	0.881214	0.946819	-7.80059	-0.0404294	3.49675	-0.540808	0.613535	0.760593	-7.75478	437	346	385	416	386	380	317	391	339	3397
Apbb1	ENSMUSG00000037032,16	0.0267599	7.25705	0.298205	0.778655	0.96692	-8.56784	-0.0473789	7.19199	-0.373025	0.725748	0.873727	-8.10247	-0.0779215	7.22584	-0.839102	0.442421	0.631883	-8.0414	5792	4983	4809	5479	5292	5117	5107	4138	4480	45197
Apbb2	ENSMUSG00000029207,16	0.061152	5.59789	0.663894	0.538846	0.96692	-8.19479	-0.043309	5.51767	-0.339194	0.749443	0.890087	-7.97204	-0.10832	5.56903	-1.18023	0.294769	0.478831	-7.4959	1415	1803	1664	1761	1645	1685	1602	1300	1404	14279
Apbb3	ENSMUSG00000117679,1	0.0245915	4.44565	0.296402	0.779946	0.96692	-8.27087	0.03769	4.42397	0.418345	0.694562	0.854926	-7.82834	0.00953659	4.4567	0.249943	0.8133	0.905804	-8.04649	811	728	680	777	742	741	733	681	654	6547
Apc	ENSMUSG00000005871,15	0.0312575	8.8447	0.356353	0.737469	0.96692	-8.70064	-0.00335593	8.79866	-0.0378659	0.971387	0.986968	-8.30844	-0.0380282	8.83543	-0.32167	0.761662	0.870946	-8.55971	14756	16004	15864	14882	17345	15704	16184	13430	12881	137050
Apc2	ENSMUSG00000020135,13	-0.0203688	7.29347	-0.164945	0.876049	0.96692	-8.60865	-0.103547	7.22393	-0.64208	0.551536	0.762098	-7.94819	-0.0870993	7.23428	-0.680832	0.528406	0.692225	-8.17219	6262	5078	4944	5360	5662	5022	5170	3981	4638	46117
Apcdd1	ENSMUSG00000071847,13	0.0952998	4.1834	0.204006	0.847139	0.96692	-8.26713	-0.0276035	4.09548	-0.0723442	0.945377	0.973552	-7.89249	-0.126448	4.16043	-0.229996	0.827872	0.915893	-8.00685	746	486	600	1265	468	447	382	905	444	5743
Apeh	ENSMUSG00000032590,14	0.00809151	4.62176	0.110863	0.916438	0.97109	-8.33679	0.001371	4.5905	0.0171614	0.987029	0.993979	-7.95036	-0.0106992	4.61526	-0.139494	0.894902	0.939549	-8.09534	875	770	874	875	887	781	790	727	775	7354
Apex1	ENSMUSG00000035960,14	-0.0506096	4.49626	-0.783336	0.472142	0.96692	-7.97896	-0.026271	4.47988	-0.411324	0.69935	0.857724	-7.83766	0.0210545	4.47541	0.604705	0.573652	0.732149	-7.87331	722	845	790	771	739	771	729	731	644	6742
Apex2	ENSMUSG00000025269,16	0.0202824	2.47687	0.337732	0.750555	0.96692	-7.96758	0.0169047	2.44667	0.58404	0.585687	0.788628	-7.45239	-0.00681487	2.47771	-0.123702	0.906721	0.942349	-7.70735	188	192	185	191	182	203	174	179	167	1661
Aph1a	ENSMUSG00000015750,15	-0.0604616	3.13954	-0.4471	0.675237	0.96692	-8.02956	-0.0137188	3.13445	-0.0985079	0.925689	0.962495	-7.76074	0.043563	3.12482	0.808255	0.458301	0.64434	-7.48449	254	358	318	321	288	279	284	301	247	2650
Aph1b	ENSMUSG00000032375,15	0.0989418	5.2285	0.418534	0.694536	0.96692	-8.30689	0.137992	5.21914	0.635797	0.555279	0.764945	-7.7776	0.0357315	5.29032	0.378329	0.721847	0.840248	-8.11396	885	1498	1425	1220	1328	1456	1276	1270	1171	11529
Aph1c	ENSMUSG00000053040,13	0.307111	1.78215	3.13827	0.0291761	0.96692	-4.71026	0.225244	1.71246	2.01713	0.104875	0.232204	-5.74702	-0.0847275	1.88608	-0.689025	0.523683	0.688027	-7.30598	99	113	104	146	114	134	108	133	97	1048
Api5	ENSMUSG00000027193,12	0.0669274	6.23058	0.37144	0.726941	0.96692	-8.43439	0.0550469	6.19624	0.307707	0.771788	0.904557	-8.045	-0.0155919	6.25108	-0.318828	0.763684	0.872395	-8.26064	1904	2762	2988	2601	2616	2694	2318	2442	2348	22673
Apip	ENSMUSG00000010911,12	0.0289941	3.7507	0.903386	0.410903	0.96692	-7.7806	0.084173	3.74982	1.61035	0.173492	0.359111	-6.60418	0.0518846	3.78487	1.07943	0.333205	0.524188	-7.34752	436	468	461	498	454	447	468	459	392	4083
Aplf	ENSMUSG00000030051,10	0.0686732	3.55903	0.726494	0.5031	0.96692	-7.90672	-0.000666723	3.49542	-0.00783939	0.994075	0.996772	-7.81961	-0.0724633	3.55061	-1.24315	0.272848	0.451979	-7.127	435	372	374	399	424	418	372	373	327	3494
Apln	ENSMUSG00000037010,7	0.263723	2.34433	1.45646	0.210495	0.96692	-6.9502	0.184414	2.27798	1.06994	0.337713	0.582651	-7.0001	-0.08351	2.42993	-0.622247	0.563025	0.723307	-7.47991	125	182	173	227	185	164	146	178	168	1548
Aplnr	ENSMUSG00000044338,9	0.0720759	3.8385	0.190092	0.857408	0.96692	-8.22685	-0.455947	3.55098	-0.812788	0.456454	0.692601	-7.44883	-0.535545	3.60856	-1.29757	0.255102	0.436623	-7.06981	272	592	669	559	430	529	220	256	570	4097
Aplp1	ENSMUSG00000006651,8	0.00599046	8.44914	0.0705444	0.946749	0.989603	-8.73587	-0.0454725	8.39502	-0.397561	0.708783	0.86343	-8.18512	-0.0549859	8.41876	-0.557989	0.602655	0.753601	-8.39326	13036	11524	11256	11737	12133	12171	11995	9742	9905	103499
Aplp2	ENSMUSG00000031996,17	0.0030327	9.72858	0.0587315	0.955652	0.99522	-8.85876	-0.0281055	9.68486	-0.345222	0.745197	0.887525	-8.2995	-0.0347584	9.70697	-0.439811	0.679768	0.809861	-8.59843	30167	28527	28203	30118	29884	27453	28694	24326	24686	252058
Apmap	ENSMUSG00000033096,7	0.104816	4.82872	0.677143	0.531138	0.96692	-8.10144	0.0585375	4.77736	0.393861	0.711329	0.86514	-7.87705	-0.0499647	4.85094	-0.768821	0.479224	0.646468	-7.80243	747	1075	1019	1006	957	1072	881	891	888	8536
Apoa1	ENSMUSG00000032083,8	-1.62866	-0.992143	-0.873572	0.425968	0.96692	-6.83703	0.65678	0.12097	0.475037	0.656522	0.833943	-7.05155	2.28477	-0.679417	1.60889	0.172956	0.331275	-5.66987	119	5	42	18	33	1	25	127	24	394
Apoa2	ENSMUSG00000005681,12	-0.575278	0.84526	-1.65507	0.164451	0.96692	-6.39364	-0.267379	0.968217	-0.782962	0.472134	0.692601	-7.01265	0.305836	0.700164	1.15511	0.303959	0.490043	-6.58399	110	56	67	52	63	38	59	72	41	558
Apobec2	ENSMUSG00000040694,4	-0.847865	1.02825	-1.0814	0.33338	0.96692	-7.09996	0.793813	1.81542	0.771192	0.478432	0.698165	-7.18906	1.6406	1.41729	1.69585	0.155112	0.302176	-6.08007	96	38	217	44	79	40	59	420	126	1119
Apod	ENSMUSG00000022548,14	-0.203217	7.16449	-0.533875	0.618414	0.96692	-8.44363	-0.147269	7.1653	-0.399465	0.707474	0.862497	-8.08815	0.0529523	7.0823	0.113439	0.914418	0.946449	-8.41485	6295	4090	5670	7803	3826	3215	3166	7151	3558	44774
Apoe	ENSMUSG00000002985,16	-0.0681612	9.1264	-0.303308	0.775003	0.96692	-8.74837	-0.0256618	9.11924	-0.107057	0.919269	0.959	-8.32518	0.0396335	9.10525	0.427208	0.688291	0.816276	-8.54209	26764	16557	16878	20189	17509	18537	19506	18590	14671	169201
Apold1	ENSMUSG00000090698,2	0.106292	1.9772	0.459008	0.667276	0.96692	-7.81522	0.297377	2.03783	0.814106	0.455771	0.692601	-7.19998	0.191671	2.11386	0.478201	0.654148	0.79249	-7.49854	111	142	136	114	183	131	164	216	83	1280
Apoo	ENSMUSG00000079508,8	-0.04084	2.81348	-0.238538	0.821811	0.96692	-8.06121	0.0236008	2.81416	0.133869	0.899181	0.953511	-7.70437	0.0628238	2.81575	0.268107	0.800106	0.896903	-7.74764	253	244	232	199	236	285	279	238	169	2135
Apool	ENSMUSG00000025525,12	-0.0374848	3.5081	-0.744526	0.493124	0.96692	-7.88515	0.139928	3.5675	1.02197	0.357662	0.609264	-7.2576	0.174835	3.56963	1.38837	0.227886	0.402938	-6.96232	376	376	430	402	386	367	381	488	328	3534
Apopt1	ENSMUSG00000037787,14	-0.00238734	4.0985	-0.0701571	0.94702	0.989737	-8.27893	0.116448	4.12931	2.25649	0.0785024	0.177582	-5.81814	0.115659	4.14874	3.06543	0.0307367	0.201968	-4.92069	601	582	573	604	582	574	588	625	522	5251
App	ENSMUSG00000022892,11	0.0173564	10.0275	0.171225	0.871384	0.96692	-8.87112	-0.0666609	9.95748	-0.603104	0.575021	0.780899	-8.17624	-0.0875306	9.98653	-1.68019	0.158182	0.307358	-7.40213	40476	33047	33302	38433	35342	34364	33203	29958	29330	307455
Appbp2	ENSMUSG00000018481,9	0.11428	6.78538	0.570008	0.595605	0.96692	-8.38266	0.0543236	6.72686	0.278325	0.792874	0.915507	-8.10074	-0.063677	6.80549	-0.681128	0.528234	0.692068	-8.1208	2703	4141	4236	3755	3820	4257	3686	3264	3328	33190
Appl1	ENSMUSG00000040760,11	0.0538623	6.43563	0.336258	0.751595	0.96692	-8.47025	0.08363	6.42186	0.585228	0.586005	0.788827	-7.92057	0.0262476	6.47018	0.288109	0.785666	0.887441	-8.29876	2331	3207	3264	2889	2882	3327	2996	2761	2645	26302
Appl2	ENSMUSG00000020263,14	0.126191	5.32489	2.35898	0.0698139	0.96692	-6.20622	0.0714635	5.26924	0.954306	0.387494	0.643449	-7.51267	-0.0579719	5.35274	-0.838391	0.442782	0.631883	-7.81019	1268	1380	1286	1566	1400	1349	1208	1420	1144	12021
Aprt	ENSMUSG00000006589,8	-0.0306432	4.96938	-0.251105	0.812654	0.96692	-8.34518	0.0543623	4.98311	0.298821	0.778142	0.907996	-7.9366	0.0821889	4.98812	0.603141	0.574631	0.732943	-7.94656	1265	953	1049	1142	1051	999	941	1291	874	9565
Aptx	ENSMUSG00000028411,15	-0.00756298	5.04262	-0.0763059	0.94241	0.987216	-8.38789	-0.0263301	5.00489	-0.268806	0.799752	0.91838	-7.94885	-0.0222342	5.02171	-0.454379	0.669984	0.802876	-8.04097	1254	1118	1025	1115	1146	1120	1060	996	969	9803
Aqp1	ENSMUSG00000004655,5	-0.00242938	7.87503	-0.0283163	0.978607	0.998181	-8.68236	-0.00876365	7.84355	-0.159071	0.88038	0.946495	-8.22241	-0.00993214	7.86314	-0.126922	0.904309	0.942173	-8.50404	8446	7873	7773	7858	8779	7548	7388	7211	7172	70048
Aqp11	ENSMUSG00000042797,9	0.184111	4.17702	1.41154	0.222554	0.96692	-7.28432	0.153435	4.13354	1.08086	0.333309	0.576953	-7.26735	-0.03441	4.24655	-0.454459	0.669931	0.802847	-7.92977	474	619	662	708	615	663	653	564	547	5505
Aqp4	ENSMUSG00000024411,10	-0.119938	3.8798	-0.503079	0.638258	0.96692	-8.10408	-0.0503834	3.88855	-0.417834	0.69491	0.854994	-7.76659	0.0645739	3.84741	0.289597	0.784596	0.886809	-7.93846	597	461	524	690	394	415	464	444	475	4464
Aqr	ENSMUSG00000040383,16	0.102381	5.97381	2.07846	0.0976614	0.96692	-6.63893	0.0321888	5.9104	0.741422	0.494636	0.712685	-7.76093	-0.0738004	5.98251	-1.6554	0.163169	0.315688	-6.98038	1946	2146	2128	2224	2288	2189	1992	1915	1876	18704
Ar	ENSMUSG00000046532,8	-0.0993783	2.4615	-0.628342	0.559903	0.96692	-7.80273	-0.112904	2.42457	-1.07197	0.33689	0.581501	-7.02371	-0.0160284	2.39703	-0.113571	0.914319	0.946399	-7.69056	170	216	199	160	180	210	175	172	144	1626
Araf	ENSMUSG00000001127,12	-0.0688098	6.2975	-0.890154	0.417881	0.96692	-8.07888	-0.0143714	6.29601	-0.240357	0.820427	0.930344	-8.07572	0.0511139	6.28273	0.745769	0.491778	0.658647	-8.00671	2524	2811	2933	2561	2549	2801	2635	2541	2270	23625
Arap1	ENSMUSG00000032812,18	-0.0312036	4.58719	-0.174519	0.86894	0.96692	-8.32179	0.17005	4.65949	0.680433	0.529059	0.743038	-7.68952	0.198254	4.66371	0.936424	0.395119	0.592897	-7.62657	1026	711	784	948	803	710	700	1157	754	7593
Arap2	ENSMUSG00000037999,13	-0.0725926	4.16549	-0.656151	0.543386	0.96692	-8.03956	0.0637583	4.20455	0.484491	0.650289	0.829844	-7.76916	0.133357	4.18955	1.09547	0.326808	0.516969	-7.39611	546	657	690	586	566	651	698	598	509	5501
Arap3	ENSMUSG00000024451,9	0.208108	3.65536	2.1595	0.088549	0.96692	-6.26775	0.0841041	3.56559	0.741296	0.494705	0.712719	-7.51385	-0.127927	3.69062	-1.56307	0.183175	0.347881	-6.77012	346	422	438	484	432	478	355	404	401	3760
Arc	ENSMUSG00000022602,14	-0.1068	1.27221	-0.435811	0.68283	0.96692	-7.68162	0.0901316	1.34724	0.261415	0.805105	0.921432	-7.39993	0.190464	1.31333	0.649674	0.546635	0.708751	-7.19852	111	64	87	92	66	82	72	67	118	759
Arcn1	ENSMUSG00000032096,16	0.122976	7.50763	1.03313	0.353206	0.96692	-8.06198	0.0722183	7.45387	0.639577	0.553026	0.763036	-7.96864	-0.0543998	7.53646	-1.26857	0.264421	0.441262	-7.63686	4969	6419	6621	6539	6253	6762	5717	5845	5534	54659
Arel1	ENSMUSG00000042350,13	0.0970284	6.25711	1.31748	0.250001	0.96692	-7.62364	-0.0387691	6.16128	-0.404054	0.704325	0.86077	-8.00131	-0.139772	6.23067	-2.09906	0.0940875	0.201968	-6.43755	2238	2680	2686	2794	2716	2631	2300	2118	2301	22464
Arf1	ENSMUSG00000048076,14	0.0422009	7.63655	0.840206	0.442616	0.96692	-8.25928	0.0501486	7.61213	1.21576	0.282948	0.509734	-7.44003	0.00440318	7.65418	0.133536	0.899358	0.940999	-8.47897	6226	6883	7010	6895	6920	6964	6306	6525	6102	59831
Arf2	ENSMUSG00000062421,13	0.142477	5.14003	3.13689	0.0292188	0.96692	-5.20845	0.180526	5.13086	2.115	0.0930904	0.207636	-6.10646	0.0346993	5.22251	0.448923	0.67364	0.805934	-8.0708	1154	1179	1107	1367	1237	1211	1090	1348	1122	10815
Arf3	ENSMUSG00000051853,10	0.0680676	7.63215	2.37073	0.068855	0.96692	-6.42727	-0.0606709	7.53987	-1.00232	0.36612	0.620056	-7.66106	-0.132669	7.59458	-2.20906	0.0822982	0.201968	-6.45688	6298	6669	6903	7392	6711	6814	6006	5499	5832	58124
Arf4	ENSMUSG00000021877,12	0.0771317	7.45772	0.338128	0.750276	0.96692	-8.57272	0.14715	7.46389	0.679801	0.529424	0.743334	-7.93996	0.0666026	7.52403	0.761957	0.482937	0.65015	-8.14247	4211	6509	7277	5963	5849	6820	5829	6423	5452	54333
Arf5	ENSMUSG00000020440,13	-0.0472496	5.2816	-0.652273	0.54567	0.96692	-8.16956	0.0202538	5.28711	0.294159	0.781484	0.909553	-7.96754	0.0640629	5.28396	1.15966	0.302277	0.487997	-7.4817	1436	1250	1372	1415	1327	1202	1229	1356	1159	11746
Arf6	ENSMUSG00000044147,8	0.126458	4.8621	2.08657	0.0967053	0.96692	-6.50944	0.0979882	4.81934	1.64555	0.166049	0.345327	-6.68003	-0.03196	4.90366	-0.703599	0.515353	0.680555	-7.8619	878	943	1036	1033	1051	1042	981	930	868	8762
Arfgap1	ENSMUSG00000027575,19	0.00605645	5.01414	0.0640406	0.95165	0.992858	-8.38579	-0.0914019	4.93752	-0.931491	0.398006	0.654083	-7.50231	-0.10116	4.96082	-2.879	0.0377239	0.201968	-5.26856	1231	1079	1006	1183	1074	1076	927	958	936	9470
Arfgap2	ENSMUSG00000027255,14	0.129555	4.54733	2.64214	0.0502944	0.96692	-5.75669	0.0689026	4.4887	1.01869	0.359063	0.611005	-7.3709	-0.0641312	4.57435	-1.05437	0.343414	0.536382	-7.49609	712	792	788	851	809	856	682	793	714	6997
Arfgap3	ENSMUSG00000054277,8	0.0338471	4.97178	0.702451	0.516626	0.96692	-8.09811	0.0733164	4.96275	0.785421	0.470826	0.692601	-7.63635	0.0364265	5.00027	0.444888	0.67635	0.808251	-8.04312	1108	1001	1071	1146	1036	1086	1107	1096	856	9507
Arfgef1	ENSMUSG00000067851,11	0.139896	7.73985	1.2516	0.2711	0.96692	-7.8488	0.0570758	7.66984	0.545113	0.611127	0.803674	-8.04901	-0.0862853	7.76094	-1.54693	0.186915	0.353713	-7.32972	5909	7589	7499	7470	7761	7868	6960	6656	6155	63867
Arfgef2	ENSMUSG00000074582,10	0.0311215	6.87285	0.545824	0.610814	0.96692	-8.40697	0.0484052	6.85324	0.463596	0.664107	0.837734	-8.03023	0.0134458	6.88978	0.122338	0.907744	0.943094	-8.39052	3782	3863	4249	4049	4265	3886	4255	3365	3613	35327
Arfgef3	ENSMUSG00000019852,7	-0.037753	7.19603	-0.211418	0.841684	0.96692	-8.5883	0.0584154	7.21516	0.336719	0.75119	0.891239	-8.1197	0.0925338	7.21806	0.495536	0.642754	0.783751	-8.29347	4211	5378	5757	4262	5609	5126	5771	4220	4557	44891
Arfip1	ENSMUSG00000074513,9	0.151013	2.30265	0.644111	0.550496	0.96692	-7.76168	0.059797	2.22791	0.308677	0.771096	0.904271	-7.55439	-0.0942715	2.3253	-0.530686	0.619999	0.76619	-7.51587	123	166	198	182	144	215	142	176	138	1484
Arfip2	ENSMUSG00000030881,15	-0.0394875	5.58417	-0.321219	0.762243	0.96692	-8.38757	-0.0772328	5.5371	-0.613487	0.568703	0.776055	-7.82285	-0.0412368	5.53771	-1.56547	0.181864	0.345771	-7.03673	1963	1506	1551	1711	1576	1583	1504	1451	1345	14190
Arfrp1	ENSMUSG00000038671,15	-0.0391276	3.77828	-0.503479	0.637998	0.96692	-8.09063	-0.106365	3.71655	-1.26874	0.265133	0.484419	-7.01002	-0.0707114	3.71719	-1.44323	0.212808	0.391996	-6.92206	514	470	443	500	456	437	386	437	382	4025
Arg1	ENSMUSG00000019987,9	-0.211911	3.46105	-0.891623	0.41717	0.96692	-7.75018	-0.117815	3.47839	-0.63285	0.55704	0.766394	-7.58335	0.0915646	3.39337	0.433362	0.684122	0.813058	-7.79622	450	445	330	310	451	308	401	334	289	3318
Arglu1	ENSMUSG00000040459,11	-0.065491	6.47713	-0.67288	0.53361	0.96692	-8.27948	-0.241345	6.36164	-1.97717	0.110136	0.242797	-6.3963	-0.179888	6.34918	-1.5917	0.176722	0.337427	-7.1057	3003	3448	2915	3301	2699	2987	2627	2147	2441	25568
Arhgap1	ENSMUSG00000027247,16	0.0883264	6.38455	1.41679	0.22111	0.96692	-7.51941	0.0503342	6.33736	0.770443	0.478834	0.698468	-7.77463	-0.041677	6.40239	-1.13445	0.311708	0.498927	-7.65048	2517	2952	2852	2995	2920	2949	2660	2589	2574	25008
Arhgap10	ENSMUSG00000037148,8	0.00216665	4.28496	0.0319646	0.975852	0.998181	-8.30408	0.123087	4.31668	1.03304	0.352973	0.603164	-7.33753	0.117891	4.33841	1.19895	0.288086	0.470107	-7.3065	691	601	708	710	665	633	627	787	578	6000
Arhgap11a	ENSMUSG00000041219,14	-0.0478615	3.73448	-0.428825	0.687551	0.96692	-8.12525	-0.104069	3.67894	-0.803347	0.461374	0.692601	-7.47684	-0.060379	3.67582	-0.704334	0.514935	0.680254	-7.67298	404	448	544	495	423	431	358	409	409	3921
Arhgap12	ENSMUSG00000041225,16	0.109143	6.34207	1.20921	0.285535	0.96692	-7.7558	0.0811566	6.29941	0.884536	0.420371	0.675408	-7.67147	-0.0313609	6.37512	-0.542554	0.612424	0.760382	-8.16366	2331	2798	2909	2838	2929	2904	2770	2604	2344	24427
Arhgap17	ENSMUSG00000030766,15	0.053261	6.04111	1.38993	0.228594	0.96692	-7.51611	-0.0330209	5.97009	-0.331683	0.754748	0.893753	-8.01594	-0.0902219	6.01732	-0.945718	0.390823	0.589106	-7.79583	2168	2303	2156	2392	2287	2224	2170	1767	1975	19442
Arhgap18	ENSMUSG00000039031,16	0.183072	3.93296	0.975852	0.378036	0.96692	-7.73391	0.044572	3.83609	0.134981	0.89835	0.953511	-7.85342	-0.14222	3.9487	-0.528499	0.621402	0.767274	-7.84019	367	542	588	606	517	554	312	613	507	4606
Arhgap19	ENSMUSG00000025154,15	0.160423	3.43899	0.494761	0.64368	0.96692	-8.04833	0.0772586	3.37034	0.246136	0.816213	0.927843	-7.76561	-0.0876018	3.4714	-0.425747	0.689283	0.816743	-7.81403	267	296	542	509	320	372	283	398	338	3325
Arhgap20	ENSMUSG00000053199,13	0.115733	5.83747	2.05949	0.0999374	0.96692	-6.6494	0.11073	5.80605	1.46033	0.209139	0.422419	-7.00224	-0.00799341	5.88493	-0.106782	0.919416	0.949691	-8.26909	1750	1919	1965	2011	2111	2004	1911	2042	1600	17313
Arhgap21	ENSMUSG00000036591,16	0.0140096	7.63055	0.201174	0.849227	0.96692	-8.63417	-0.0461677	7.57241	-0.444113	0.677133	0.845691	-8.09896	-0.0638362	7.5999	-0.676672	0.530815	0.694418	-8.21816	6868	7061	6306	7139	7003	6368	6721	5478	5679	58623
Arhgap22	ENSMUSG00000063506,14	-0.0558394	3.91923	-0.383488	0.718584	0.96692	-8.17118	-0.0853001	3.87525	-0.430555	0.686275	0.849967	-7.75852	-0.0322227	3.86764	-0.226259	0.830611	0.916155	-7.96112	638	467	490	529	526	472	547	467	358	4494
Arhgap23	ENSMUSG00000049807,16	0.0994105	5.64416	2.68706	0.0477976	0.96692	-5.81964	0.015114	5.574	0.498849	0.640509	0.822739	-7.89937	-0.0879712	5.64423	-2.37324	0.0675762	0.201968	-6.00597	1671	1643	1637	1884	1784	1663	1504	1558	1490	14834
Arhgap24	ENSMUSG00000057315,14	-0.135666	5.1158	-0.99949	0.367617	0.96692	-7.84895	-0.061502	5.12441	-0.433319	0.684406	0.848713	-7.89208	0.0709599	5.07689	1.2647	0.265688	0.442955	-7.33678	1486	1105	1165	1202	1143	1061	1141	1156	958	10417
Arhgap25	ENSMUSG00000030047,14	0.0509806	4.21824	0.588168	0.58434	0.96692	-8.09351	-0.109574	4.10981	-0.844666	0.440137	0.692601	-7.49387	-0.164216	4.15567	-1.46127	0.208066	0.386659	-6.97159	671	633	573	676	671	603	618	481	490	5416
Arhgap26	ENSMUSG00000036452,18	0.00239032	6.2699	0.0206504	0.984397	0.998181	-8.52103	-0.015877	6.23303	-0.0921201	0.930491	0.965063	-8.10005	-0.0224902	6.25507	-0.172543	0.870271	0.926272	-8.30417	2201	2955	2807	2771	2580	2599	2681	2023	2458	23075
Arhgap27	ENSMUSG00000034255,17	-0.00376196	2.9513	-0.0320865	0.97576	0.998181	-8.11794	-0.0874324	2.88241	-0.625091	0.561694	0.770132	-7.49812	-0.0879484	2.90073	-0.943928	0.391647	0.589954	-7.31386	258	304	235	278	247	269	223	213	244	2271
Arhgap28	ENSMUSG00000024043,13	0.170209	7.24458	1.12195	0.317477	0.96692	-7.94275	0.0898408	7.1763	0.585503	0.585835	0.788694	-7.98352	-0.0842118	7.2824	-1.32069	0.247897	0.427865	-7.54683	3901	5667	5264	5595	5756	5217	4846	4581	4765	45592
Arhgap29	ENSMUSG00000039831,16	-0.0386948	5.98588	-0.262816	0.804152	0.96692	-8.45012	0.0527873	6.00338	0.182479	0.862998	0.937541	-8.06491	0.0888182	6.00386	0.278707	0.792441	0.892156	-8.24427	2092	2244	2253	2730	2024	1781	1564	3238	1748	19674
Arhgap31	ENSMUSG00000022799,4	0.375624	5.11743	2.065	0.099271	0.96692	-6.56508	0.0438417	4.92322	0.214764	0.839174	0.933868	-7.95659	-0.335165	5.13183	-2.16533	0.0867824	0.201968	-6.20968	869	974	1331	1574	1171	1352	869	1212	882	10234
Arhgap32	ENSMUSG00000041444,14	0.0609049	6.14426	0.487862	0.648197	0.96692	-8.3669	-0.0101441	6.0807	-0.0778163	0.941255	0.971308	-8.08819	-0.0750312	6.13228	-0.896213	0.414148	0.611514	-7.85702	1970	2542	2640	2489	2334	2619	2076	2097	2244	21011
Arhgap33	ENSMUSG00000036882,7	0.0137953	4.86405	0.180507	0.864501	0.96692	-8.35192	-0.196596	4.7313	-1.49005	0.201545	0.409106	-6.86352	-0.214541	4.75846	-1.86398	0.125755	0.253161	-6.55215	1056	1005	914	1083	960	970	882	688	800	8358
Arhgap35	ENSMUSG00000058230,12	0.133593	8.18133	4.94453	0.00552681	0.896766	-3.57366	-0.0216523	8.07543	-0.725489	0.503383	0.720517	-7.95245	-0.158856	8.16302	-4.20987	0.00985976	0.201968	-4.11434	9249	9588	9567	10546	10555	10188	8842	8419	8203	85157
Arhgap36	ENSMUSG00000036198,12	-0.104036	4.34471	-0.61226	0.569604	0.96692	-8.09236	0.189097	4.46193	0.628288	0.559773	0.768485	-7.70663	0.290622	4.43141	1.15454	0.304174	0.490296	-7.36903	582	694	919	679	647	691	581	1100	647	6540
Arhgap39	ENSMUSG00000033697,15	0.104417	5.95242	1.24778	0.272372	0.96692	-7.67215	-0.0503159	5.84733	-0.457657	0.668063	0.840258	-7.94649	-0.158752	5.91996	-2.1514	0.0882651	0.201968	-6.3304	2275	1912	1952	2329	2146	2134	1846	1678	1860	18132
Arhgap42	ENSMUSG00000050730,17	0.192432	5.04825	2.42632	0.0645081	0.96692	-6.08918	0.118111	4.98261	0.760365	0.484279	0.703111	-7.65915	-0.0773421	5.09935	-0.522656	0.625156	0.76994	-8.0128	956	1113	1110	1346	1111	1192	919	1326	931	10004
Arhgap44	ENSMUSG00000033389,16	0.128422	5.55197	3.40094	0.0222228	0.96692	-4.93823	0.0926197	5.50568	2.71932	0.0453921	0.129487	-5.35864	-0.0393005	5.59071	-0.934001	0.396245	0.593528	-7.75311	1532	1549	1516	1676	1672	1698	1561	1483	1418	14105
Arhgap45	ENSMUSG00000035697,14	-0.713075	1.18836	-2.48835	0.0600117	0.96692	-5.39252	-0.359569	1.33693	-1.23642	0.275875	0.499783	-6.63561	0.350874	0.998743	1.01455	0.360192	0.556499	-6.80321	121	81	100	78	69	41	56	104	59	709
Arhgap5	ENSMUSG00000035133,9	0.0708684	7.04811	0.310684	0.769738	0.96692	-8.54231	0.111093	7.03917	0.512383	0.632096	0.816962	-8.0181	0.0370268	7.09624	0.378164	0.721961	0.840319	-8.33876	3179	5011	5376	4387	4476	5135	4444	4737	3860	40605
Arhgap6	ENSMUSG00000031355,16	-0.0136444	1.51859	-0.131823	0.900742	0.96692	-7.83672	-0.185521	1.40084	-0.535538	0.617218	0.806544	-7.28176	-0.172699	1.41413	-0.532805	0.618643	0.765141	-7.29921	112	92	91	102	93	97	63	133	56	839
Arhgdia	ENSMUSG00000025132,13	-0.0142667	8.95535	-0.19283	0.855385	0.96692	-8.765	-0.0549589	8.90697	-0.65365	0.544689	0.756328	-8.06841	-0.0443361	8.92032	-1.02835	0.354303	0.549758	-8.05229	18586	16684	15966	17635	16712	16490	15526	14519	14746	146864
Arhgdib	ENSMUSG00000030220,13	-0.353482	3.17966	-1.17689	0.297011	0.96692	-7.41696	-0.0520553	3.30132	-0.142711	0.892576	0.951985	-7.77936	0.299432	3.14324	0.808826	0.458003	0.64434	-7.48741	468	305	300	340	312	194	245	494	236	2894
Arhgdig	ENSMUSG00000073433,11	-0.0643815	6.57727	-0.592551	0.581641	0.96692	-8.34664	0.00724677	6.5845	0.0560722	0.957645	0.97962	-8.1335	0.0684876	6.57281	0.814969	0.454808	0.642235	-7.98429	3819	3148	3087	3259	3308	3045	3447	3087	2659	28859
Arhgef1	ENSMUSG00000040940,18	-0.0271405	5.16541	-0.322971	0.760999	0.96692	-8.34198	-0.0113734	5.14563	-0.118509	0.91068	0.95571	-7.99762	0.0119337	5.15226	0.170347	0.871902	0.927227	-8.16367	1333	1247	1140	1329	1195	1139	1049	1155	1150	10737
Arhgef10	ENSMUSG00000071176,10	0.114263	5.34447	1.25978	0.268391	0.96692	-7.59434	0.073548	5.29614	0.743276	0.493615	0.711815	-7.70322	-0.0442602	5.37353	-0.454909	0.66963	0.802691	-8.08741	1430	1226	1354	1644	1314	1408	1175	1449	1222	12222
Arhgef10l	ENSMUSG00000040964,16	-0.0137991	5.62221	-0.307761	0.771823	0.96692	-8.39663	-0.0184349	5.59178	-0.326589	0.758356	0.896183	-7.98385	-0.00847961	5.60578	-0.115999	0.912497	0.945148	-8.23234	1684	1677	1709	1660	1640	1745	1536	1461	1560	14672
Arhgef11	ENSMUSG00000041977,18	0.0651442	7.25596	1.14329	0.309383	0.96692	-7.92097	-0.0223838	7.18421	-0.202158	0.848454	0.933868	-8.16052	-0.0914305	7.23744	-0.84476	0.439554	0.631883	-8.03773	5221	5229	4872	5418	5531	5143	5096	4067	4615	45192
Arhgef12	ENSMUSG00000059495,14	0.0928728	7.0251	1.04361	0.348818	0.96692	-8.00299	-0.0304384	6.93523	-0.322	0.761611	0.898303	-8.10243	-0.127166	7.00275	-2.22188	0.0810307	0.201968	-6.37055	3759	4473	4751	4600	4712	4532	3931	3726	3860	38344
Arhgef15	ENSMUSG00000052921,13	0.0599101	4.25004	0.803804	0.461348	0.96692	-7.93235	-0.0344742	4.17516	-0.391484	0.712967	0.865843	-7.81322	-0.0984276	4.2256	-1.22363	0.279483	0.459337	-7.26128	678	630	603	689	694	617	564	542	591	5608
Arhgef17	ENSMUSG00000032875,8	0.0842892	6.61891	1.04736	0.347258	0.96692	-7.95798	0.0114459	6.55424	0.138921	0.895406	0.952748	-8.12113	-0.0763112	6.61689	-5.24784	0.00363492	0.201968	-2.81929	3615	3002	3195	3654	3392	3371	3076	3095	2805	29205
Arhgef18	ENSMUSG00000004568,12	0.0791355	5.65541	1.96366	0.112332	0.96692	-6.75473	-0.00964829	5.58276	-0.249305	0.813905	0.926295	-8.00963	-0.0924359	5.64316	-1.86334	0.125854	0.253325	-6.67107	1699	1651	1674	1764	1816	1750	1560	1490	1491	14895
Arhgef19	ENSMUSG00000028919,11	-0.0179798	2.81955	-0.326077	0.758797	0.96692	-8.03268	-0.00182377	2.80101	-0.0156528	0.988169	0.994738	-7.71284	0.0114471	2.81255	0.0908711	0.93138	0.957322	-7.78511	231	246	250	259	219	244	205	209	250	2113
Arhgef2	ENSMUSG00000028059,15	0.0264592	4.98034	0.312203	0.768655	0.96692	-8.32578	-0.0586234	4.91009	-1.87552	0.123566	0.267159	-6.3936	-0.0889518	4.94364	-0.991893	0.370046	0.567756	-7.61107	1056	1075	1074	1216	1134	944	919	952	929	9299
Arhgef25	ENSMUSG00000019467,15	-0.0103351	5.86937	-0.0737082	0.944366	0.988154	-8.47642	-0.0292476	5.83163	-0.210915	0.842004	0.933868	-8.04279	-0.0222813	5.84677	-0.406569	0.702365	0.825761	-8.17255	2407	1810	1848	2106	2057	1838	1899	1831	1637	17433
Arhgef26	ENSMUSG00000036885,14	0.133835	3.6677	1.74063	0.147883	0.96692	-6.81079	0.0998025	3.62296	1.40271	0.224662	0.439643	-6.84173	-0.037943	3.7105	-0.440051	0.679607	0.809854	-7.85008	389	408	447	499	407	467	377	428	408	3830
Arhgef28	ENSMUSG00000021662,11	0.0121936	5.222	0.192435	0.855676	0.96692	-8.38849	-0.00720199	5.18394	-0.0927941	0.929984	0.964773	-8.00461	-0.0229216	5.21088	-0.313208	0.767687	0.87522	-8.13003	1197	1356	1259	1280	1332	1245	1265	1102	1087	11123
Arhgef3	ENSMUSG00000021895,10	-0.0178562	4.1237	-0.190053	0.857437	0.96692	-8.26315	0.00970073	4.10933	0.151004	0.886389	0.948984	-7.8835	0.0239791	4.12113	0.343758	0.74603	0.85868	-7.96234	539	636	626	631	529	627	549	572	525	5234
Arhgef37	ENSMUSG00000045094,8	0.0368918	2.44647	0.85058	0.437073	0.96692	-7.62203	-0.0103863	2.39535	-0.12377	0.906738	0.954428	-7.63261	-0.051591	2.43467	-0.552221	0.606295	0.755784	-7.52758	185	180	185	191	180	196	170	153	175	1615
Arhgef4	ENSMUSG00000037509,21	-0.0106467	5.25735	-0.102167	0.922964	0.975118	-8.40846	-0.0274551	5.22128	-0.279289	0.792179	0.91512	-7.96633	-0.0206697	5.23602	-0.27723	0.793508	0.892827	-8.14602	1464	1260	1223	1471	1265	1197	1237	1131	1146	11394
Arhgef40	ENSMUSG00000004562,16	0.0209656	5.59592	0.24334	0.818308	0.96692	-8.41513	-0.0682154	5.52361	-0.744988	0.492674	0.710836	-7.72296	-0.0930693	5.55446	-1.10661	0.322428	0.511673	-7.57382	1766	1506	1659	1852	1517	1658	1323	1494	1459	14234
Arhgef5	ENSMUSG00000033542,13	0.0741161	2.34539	0.430085	0.686699	0.96692	-7.90136	-0.109764	2.22696	-0.351533	0.740762	0.884711	-7.53665	-0.187576	2.28298	-0.539299	0.614496	0.761281	-7.50019	165	177	165	229	141	175	92	206	152	1502
Arhgef6	ENSMUSG00000031133,12	0.124049	4.72169	0.783195	0.472217	0.96692	-8.00491	0.0240107	4.64297	0.148267	0.88843	0.949635	-7.94272	-0.103292	4.72644	-1.15555	0.303797	0.489825	-7.41014	684	966	971	900	957	979	738	892	772	7859
Arhgef7	ENSMUSG00000031511,15	0.124702	7.14347	3.53999	0.0193264	0.96692	-4.9398	-0.0161087	7.04521	-0.272214	0.797287	0.917448	-8.12918	-0.144675	7.12806	-2.26205	0.0771966	0.201968	-6.33287	4591	4705	4582	5421	5022	4765	4380	3957	4160	41583
Arhgef9	ENSMUSG00000025656,17	0.0334352	6.05445	0.379265	0.721508	0.96692	-8.4127	-0.0394236	5.98946	-0.5351	0.617497	0.806762	-7.91481	-0.0762591	6.02725	-1.42645	0.217315	0.392311	-7.26913	1991	2387	2375	2269	2231	2423	2060	2042	1861	19639
Arid1a	ENSMUSG00000007880,16	-0.00367305	6.94823	-0.0451531	0.965896	0.998181	-8.58923	-0.05189	6.89608	-0.609213	0.571299	0.778219	-7.94438	-0.0517798	6.91457	-0.989276	0.371199	0.569084	-7.86315	4641	4050	4011	4576	4168	3964	3982	3666	3487	36545
Arid1b	ENSMUSG00000069729,14	0.00305735	6.30412	0.0499281	0.962292	0.998181	-8.52328	-0.0236346	6.26236	-0.321861	0.76171	0.898366	-8.0454	-0.030158	6.28461	-0.474617	0.656518	0.794078	-8.19224	2864	2574	2658	2726	2799	2616	2643	2366	2244	23490
Arid2	ENSMUSG00000033237,19	0.0840398	5.74208	1.18954	0.292473	0.96692	-7.71542	0.0178399	5.68055	0.234435	0.824753	0.932979	-8.02289	-0.0696066	5.74343	-2.74747	0.0431	0.201968	-5.53001	1577	1840	1928	1977	1851	1844	1686	1730	1498	15931
Arid3a	ENSMUSG00000019564,12	-0.088768	2.85768	-0.966064	0.382423	0.96692	-7.58582	-0.0399363	2.85463	-0.308733	0.771056	0.904253	-7.6644	0.0445686	2.83033	0.400282	0.70668	0.828683	-7.69845	283	242	242	261	222	240	256	202	222	2170
Arid3b	ENSMUSG00000004661,15	-0.0931222	2.48524	-1.05434	0.344371	0.96692	-7.4319	-0.130473	2.4403	-1.0094	0.363051	0.616215	-7.09042	-0.0421487	2.41398	-0.339149	0.74928	0.861171	-7.63319	179	215	199	205	185	168	154	155	185	1645
Arid4a	ENSMUSG00000048118,17	-0.00337653	5.34619	-0.0448831	0.966099	0.998181	-8.42317	-0.0481269	5.29551	-0.450777	0.672662	0.843728	-7.89946	-0.0481432	5.31415	-0.574239	0.592474	0.746805	-8.00915	1511	1360	1310	1493	1377	1314	1398	1203	1088	12054
Arid4b	ENSMUSG00000039219,18	0.0750186	5.85913	1.43885	0.215144	0.96692	-7.43855	0.0518543	5.81903	0.645717	0.549378	0.760365	-7.82587	-0.0263163	5.87705	-0.353864	0.738923	0.853301	-8.19996	1936	2002	1860	2158	1916	2061	2013	1893	1583	17422
Arid5a	ENSMUSG00000037447,16	-0.00806068	1.94493	-0.0623437	0.952929	0.993704	-7.93209	-0.00430018	1.92055	-0.0693697	0.947616	0.974683	-7.55081	-0.000785324	1.93565	-0.00605824	0.995418	0.997068	-7.59207	138	124	133	163	119	116	121	117	120	1151
Arid5b	ENSMUSG00000019947,10	-0.136836	4.06137	-1.11993	0.318253	0.96692	-7.60221	-0.0290888	4.08711	-0.272777	0.79688	0.917225	-7.8498	0.104397	4.03873	0.717365	0.50757	0.673621	-7.7241	577	567	653	668	477	509	519	631	461	5062
Arih1	ENSMUSG00000025234,11	0.110092	7.04491	0.768939	0.479847	0.96692	-8.26135	0.0789493	7.00071	0.576555	0.591382	0.791693	-7.975	-0.0345903	7.077	-0.690992	0.522553	0.686941	-8.14592	3499	4726	4943	4640	4574	4912	4318	4336	3875	39823
Arih2	ENSMUSG00000064145,12	-0.0156641	4.83571	-0.254495	0.810189	0.96692	-8.32933	-0.00463847	4.81301	-0.0775506	0.941455	0.971422	-7.96976	0.00747919	4.82585	0.262844	0.803771	0.898744	-8.0953	956	1054	935	988	958	975	903	897	867	8533
Arl1	ENSMUSG00000060904,14	-0.00214767	6.38775	-0.0211264	0.984038	0.998181	-8.53313	0.0947629	6.40724	1.14652	0.307874	0.544216	-7.41706	0.0936878	6.42754	1.11513	0.319113	0.508039	-7.67444	2603	2795	3218	2696	2876	3051	2959	2904	2497	25599
Arl10	ENSMUSG00000025870,10	-0.0781106	3.21237	-1.04693	0.347437	0.96692	-7.56171	-0.0905346	3.17817	-1.07209	0.336843	0.581475	-7.14965	-0.016352	3.16005	-0.228753	0.828783	0.916155	-7.83056	350	303	323	303	309	315	272	273	288	2736
Arl13b	ENSMUSG00000022911,11	0.0161379	4.03861	0.475783	0.655981	0.96692	-8.14002	0.0843103	4.04413	1.52327	0.193377	0.39443	-6.74825	0.0649352	4.07294	1.54737	0.186812	0.35353	-6.85377	524	567	584	594	550	556	543	589	486	4993
Arl14ep	ENSMUSG00000027122,15	0.123827	5.00676	0.604727	0.574186	0.96692	-8.17305	0.0605025	4.94687	0.291601	0.78332	0.909874	-7.93561	-0.0671415	5.03028	-0.841721	0.441092	0.631883	-7.76436	772	1189	1265	1129	1114	1213	942	1024	1031	9679
Arl15	ENSMUSG00000042348,10	0.144531	4.33713	0.541625	0.613479	0.96692	-8.13763	0.196467	4.33462	0.780785	0.473294	0.693148	-7.57487	0.0483479	4.42863	0.499286	0.640305	0.782346	-7.9327	445	800	792	698	679	817	685	689	679	6284
Arl16	ENSMUSG00000057594,12	-0.063492	4.70706	-0.630671	0.558507	0.96692	-8.12159	-0.0673254	4.67694	-0.640659	0.552381	0.762676	-7.72029	-0.00740313	4.66564	-0.135285	0.898048	0.940999	-8.10322	1030	873	843	899	900	830	849	774	754	7752
Arl2	ENSMUSG00000024944,6	-0.0604094	5.21768	-0.388813	0.714905	0.96692	-8.31986	-0.0557638	5.19157	-0.346019	0.744636	0.887143	-7.93859	0.00143737	5.18159	0.0250065	0.981088	0.989878	-8.18473	1598	1189	1151	1311	1269	1171	1225	1179	1012	11105
Arl2bp	ENSMUSG00000031776,17	0.0479554	6.45394	0.922551	0.402434	0.96692	-8.06464	0.0466936	6.42508	0.832263	0.446431	0.692601	-7.7293	-0.00502048	6.47004	-0.12591	0.905067	0.942173	-8.33905	2741	2910	3200	3078	3054	3040	2806	2751	2746	26326
Arl3	ENSMUSG00000025035,9	-0.0894334	5.96672	-0.494486	0.64386	0.96692	-8.34473	-0.0844238	5.94049	-0.429036	0.687303	0.85088	-7.9696	0.00202313	5.91613	0.0260076	0.980331	0.98946	-8.27954	2828	1969	1922	2108	2065	2063	2103	1978	1619	18655
Arl4a	ENSMUSG00000047446,18	-0.0232497	5.98179	-0.590317	0.583016	0.96692	-8.28683	0.0859821	6.00739	0.620859	0.564244	0.772425	-7.86026	0.106566	6.01658	0.807132	0.458887	0.64434	-7.92247	2062	2262	2208	2179	2115	2156	1972	2641	1775	19370
Arl4c	ENSMUSG00000049866,12	0.0221683	5.72788	0.401707	0.706033	0.96692	-8.36827	0.00199482	5.68934	0.0328846	0.97515	0.988925	-8.05626	-0.0236958	5.72141	-0.448583	0.673868	0.80612	-8.13565	1657	1858	1881	1820	1846	1829	1758	1613	1544	15806
Arl4d	ENSMUSG00000034936,2	0.0227005	2.85946	0.106738	0.919533	0.973067	-8.0965	0.0558095	2.84668	0.222574	0.833439	0.933868	-7.69081	0.0300772	2.87793	0.227075	0.830013	0.916155	-7.77297	330	219	205	256	254	241	284	229	191	2209
Arl5a	ENSMUSG00000036093,7	0.145772	6.66643	0.604063	0.574591	0.96692	-8.34788	0.061088	6.59549	0.269576	0.799194	0.918186	-8.0925	-0.0884781	6.69012	-0.867427	0.428215	0.624607	-7.95184	2340	3710	4125	3427	3522	4084	3186	3080	3128	30602
Arl5b	ENSMUSG00000017418,13	0.0376554	5.54375	0.127699	0.903827	0.96692	-8.43555	0.0696638	5.53109	0.249484	0.813774	0.926203	-8.00488	0.028371	5.57182	0.276269	0.794202	0.893298	-8.19024	1027	1860	2030	1516	1541	1826	1482	1537	1486	14305
Arl6	ENSMUSG00000022722,18	-0.0268045	5.17341	-0.236956	0.822966	0.96692	-8.37169	0.0717598	5.19366	0.822329	0.451522	0.692601	-7.6271	0.0954505	5.2016	0.93098	0.397653	0.595171	-7.7054	1107	1320	1315	1142	1198	1348	1295	1219	1063	11007
Arl6ip1	ENSMUSG00000030654,9	0.0697934	7.16206	0.500503	0.639934	0.96692	-8.46337	0.0863253	7.1419	0.631934	0.557588	0.766851	-7.94887	0.0129251	7.19797	0.435199	0.682881	0.812035	-8.32362	3850	5119	5519	5082	4887	5135	4666	4769	4408	43435
Arl6ip4	ENSMUSG00000029404,15	-0.234777	4.65859	-0.719703	0.506895	0.96692	-8.04925	-0.156966	4.66949	-0.471044	0.659164	0.835255	-7.82659	0.0742336	4.57168	0.520355	0.626638	0.771149	-7.94124	1459	764	736	873	848	685	911	706	690	7672
Arl6ip5	ENSMUSG00000035199,6	0.048445	6.4708	2.20536	0.0826254	0.96692	-6.5207	0.0199767	6.42824	0.557888	0.603056	0.798016	-7.93885	-0.0319828	6.47329	-0.857249	0.433278	0.630004	-7.93473	2888	2982	3069	3139	3102	3040	2655	2926	2670	26471
Arl6ip6	ENSMUSG00000026960,6	-0.0525424	3.19969	-0.191552	0.856329	0.96692	-8.1358	0.115807	3.25526	0.412235	0.698727	0.857353	-7.68379	0.165176	3.25057	1.70679	0.153003	0.298644	-6.5088	215	346	436	338	281	311	300	368	282	2877
Arl8a	ENSMUSG00000026426,10	0.0290128	8.01773	0.665677	0.537805	0.96692	-8.43913	-0.0520126	7.94876	-0.490188	0.646549	0.827242	-8.10333	-0.0845056	7.98408	-0.759768	0.484126	0.651402	-8.19703	8670	8923	8700	8953	8730	9262	9079	7136	7015	76468
Arl8b	ENSMUSG00000030105,8	0.0846573	7.60843	0.496048	0.64284	0.96692	-8.51046	0.0705306	7.57269	0.430798	0.686111	0.84982	-8.10584	-0.0176495	7.63639	-0.206724	0.844974	0.916155	-8.46185	5059	7267	7368	6624	6670	7420	6744	6088	5756	58996
Armc1	ENSMUSG00000027599,9	0.0632385	6.22508	0.52004	0.627284	0.96692	-8.35655	0.101803	6.21591	0.932437	0.397566	0.653861	-7.61934	0.034923	6.26879	0.555841	0.604009	0.754733	-8.14233	2103	2650	2799	2556	2540	2780	2499	2441	2382	22750
Armc10	ENSMUSG00000038525,16	0.165946	4.54238	0.93832	0.395085	0.96692	-7.84448	0.209662	4.53589	1.17232	0.298363	0.531397	-7.2138	0.0402212	4.63996	1.29663	0.254915	0.436623	-7.24003	569	869	856	882	819	839	836	804	734	7208
Armc2	ENSMUSG00000071324,11	0.0294378	2.95726	0.179994	0.864881	0.96692	-8.09988	0.0623486	2.94509	0.488981	0.647341	0.827766	-7.59519	0.0295275	2.98145	0.265529	0.801974	0.897693	-7.78329	218	302	273	250	307	253	254	247	246	2350
Armc5	ENSMUSG00000042178,6	0.059929	3.5885	0.916339	0.40536	0.96692	-7.74552	0.0767415	3.56847	1.22265	0.280569	0.506238	-7.04319	0.01348	3.61895	0.228955	0.828635	0.916155	-7.91758	424	392	391	440	389	435	376	422	361	3630
Armc6	ENSMUSG00000002343,11	0.0211669	5.2072	0.209625	0.843003	0.96692	-8.38271	0.00246815	5.17011	0.0223257	0.983127	0.992535	-8.00822	-0.0225978	5.20097	-0.357588	0.736313	0.851399	-8.11107	1418	1198	1157	1362	1275	1195	1172	1095	1159	11031
Armc7	ENSMUSG00000057219,11	-0.0301564	2.13406	-0.371092	0.727183	0.96692	-7.88899	0.0359139	2.1393	0.594009	0.580594	0.784931	-7.38869	0.062319	2.14411	0.999838	0.366566	0.563905	-7.09203	161	141	152	168	137	142	146	146	131	1324
Armc8	ENSMUSG00000032468,11	0.0539871	6.7978	0.541622	0.61348	0.96692	-8.40196	0.0747813	6.7799	0.726587	0.502858	0.72003	-7.84786	0.0170013	6.82803	0.215241	0.838703	0.916155	-8.36417	3246	4032	3961	3767	4034	3870	3753	3388	3591	33642
Armc9	ENSMUSG00000062590,13	0.098032	3.79648	2.57106	0.0544288	0.96692	-5.7545	-0.00171813	3.71832	-0.0252594	0.98091	0.991927	-7.84905	-0.103273	3.78828	-1.4137	0.220801	0.397483	-6.96953	445	466	464	489	502	487	383	451	418	4105
Armcx1	ENSMUSG00000033460,14	-0.0295167	7.21766	-0.463351	0.664385	0.96692	-8.48971	0.0456585	7.22668	0.495814	0.642868	0.824528	-8.04305	0.0717212	7.23292	0.821774	0.451288	0.638638	-8.05762	4702	5284	5451	5033	4909	5224	5489	4662	4380	45134
Armcx2	ENSMUSG00000033436,13	0.10362	7.11981	1.00621	0.3647	0.96692	-8.05049	0.0551624	7.06703	0.604249	0.574323	0.780446	-7.96195	-0.0520058	7.14004	-0.895181	0.414647	0.612038	-7.98044	3960	4859	4998	4782	4934	5128	4519	4343	4140	41663
Armcx3	ENSMUSG00000049047,11	-0.0430311	5.11679	-0.529441	0.621249	0.96692	-8.23378	-0.0471998	5.08594	-0.448415	0.674245	0.844072	-7.88064	-0.00758463	5.08558	-0.0581637	0.956035	0.973841	-8.17021	1220	1189	1198	1087	1211	1224	1243	974	979	10325
Armcx4	ENSMUSG00000049804,9	0.0314851	6.2937	0.558552	0.60278	0.96692	-8.33982	-0.0328397	6.2333	-0.616387	0.566946	0.774758	-7.88311	-0.0679135	6.2697	-1.18665	0.292463	0.475767	-7.57707	2757	2535	2664	2803	2831	2535	2514	2327	2237	23203
Armcx5	ENSMUSG00000072969,2	0.0609006	2.98334	0.592065	0.58194	0.96692	-7.91808	-0.0324632	2.90831	-0.308914	0.770927	0.904182	-7.67317	-0.0968873	2.95986	-3.29498	0.022571	0.201968	-4.39323	224	288	285	284	269	277	246	237	222	2332
Armcx6	ENSMUSG00000050394,14	-0.114064	3.33949	-0.547109	0.61	0.96692	-8.0025	0.0604945	3.39688	0.255744	0.809222	0.923493	-7.76641	0.172152	3.36034	1.25857	0.267707	0.445445	-7.07486	475	317	308	319	341	340	400	361	272	3133
Armh3	ENSMUSG00000039901,10	0.104444	5.10527	2.81569	0.0413856	0.96692	-5.6001	-0.0490545	5.00037	-1.42962	0.216567	0.435315	-6.96417	-0.157029	5.07308	-4.97701	0.00508294	0.201968	-2.96735	1121	1166	1115	1308	1207	1160	1042	1015	936	10070
Armh4	ENSMUSG00000036242,15	0.0999992	6.52939	3.06396	0.0315755	0.96692	-5.44217	0.0927149	6.49718	1.67601	0.159869	0.33379	-6.79502	-0.0106414	6.56805	-0.167991	0.873654	0.927835	-8.34354	2999	3021	3123	3274	3353	3214	3252	2957	2684	27877
Armt1	ENSMUSG00000061759,15	0.0451664	3.17646	0.684956	0.526628	0.96692	-7.88243	0.115176	3.1826	1.25269	0.270418	0.491872	-6.95395	0.0670283	3.22614	0.98543	0.372898	0.570894	-7.34059	273	318	322	323	319	302	291	341	269	2758
Arnt	ENSMUSG00000015522,18	-0.00275344	4.81735	-0.0466989	0.964729	0.998181	-8.36512	-0.0716249	4.75501	-1.03351	0.352773	0.60288	-7.38337	-0.0724819	4.77397	-0.901267	0.411717	0.608718	-7.67499	922	996	975	1084	912	910	775	927	808	8309
Arnt2	ENSMUSG00000015709,9	0.119477	6.63893	1.47051	0.206853	0.96692	-7.48054	-0.0326788	6.53513	-0.510707	0.633181	0.817674	-7.97682	-0.156003	6.61523	-1.7459	0.145701	0.286436	-6.943	3235	3397	3172	3896	3698	3135	2770	2972	2980	29255
Arntl	ENSMUSG00000055116,8	-0.0413853	2.78075	-0.255631	0.809365	0.96692	-8.05055	-0.0554783	2.74638	-0.353265	0.739547	0.883774	-7.62866	-0.0177551	2.74514	-0.0870923	0.934225	0.959114	-7.77092	214	240	262	299	211	197	179	262	192	2056
Arpc1a	ENSMUSG00000029621,14	0.0955407	6.92678	2.72196	0.0459539	0.96692	-5.90727	0.00715234	6.85415	0.184799	0.86128	0.936351	-8.1374	-0.0916879	6.92259	-3.18808	0.026944	0.201968	-5.13353	4095	4028	3940	4414	4352	4176	3739	3911	3392	36047
Arpc1b	ENSMUSG00000029622,16	-0.0875965	6.92151	-0.51363	0.631419	0.96692	-8.43144	-0.0117729	6.93132	-0.0710574	0.946346	0.973936	-8.16145	0.0724013	6.90767	1.00257	0.365374	0.562782	-7.84922	5244	3532	4203	4579	3727	3839	4084	4036	3463	36707
Arpc2	ENSMUSG00000006304,14	0.0571606	8.04355	3.02459	0.0321239	0.96692	-5.62851	0.00920713	7.99127	0.302568	0.775439	0.906561	-8.19403	-0.051369	8.04048	-2.00762	0.105265	0.218606	-6.77154	8779	8930	8801	9627	9123	8952	8499	8307	7494	78512
Arpc3	ENSMUSG00000029465,14	-0.0300994	7.66864	-0.236456	0.823332	0.96692	-8.62862	0.0138842	7.66206	0.0948239	0.928458	0.963892	-8.21813	0.0409021	7.66748	0.467712	0.661096	0.79668	-8.36153	8279	6510	6430	7027	7159	6543	7311	6551	5593	61403
Arpc4	ENSMUSG00000079426,13	-0.00166284	6.42064	-0.0412573	0.968836	0.998181	-8.53575	-0.0209455	6.38283	-0.417686	0.695011	0.855024	-8.01396	-0.0229839	6.4028	-0.452685	0.671118	0.803922	-8.21862	2832	3041	2913	2946	2964	2899	2716	2554	2608	25473
Arpc5	ENSMUSG00000008475,13	0.0364425	7.26499	0.249263	0.813994	0.96692	-8.5847	0.099199	7.26782	0.687738	0.524849	0.73985	-7.91818	0.0590943	7.30737	0.740221	0.494834	0.661661	-8.13477	4189	5663	5878	5147	5290	5606	5485	4865	4841	46964
Arpc5l	ENSMUSG00000026755,14	-0.063956	5.21662	-1.31557	0.25059	0.96692	-7.5164	-0.00167255	5.21955	-0.0235432	0.982207	0.992158	-8.01291	0.0587438	5.20808	0.959072	0.384717	0.582369	-7.67919	1342	1308	1247	1303	1254	1186	1298	1148	1101	11187
Arpin	ENSMUSG00000039043,5	-0.0155189	4.20886	-0.792622	0.465793	0.96692	-7.93858	0.0904395	4.23337	2.73486	0.0440034	0.129487	-5.20572	0.102619	4.24627	3.11565	0.0287847	0.201968	-4.8681	628	638	638	657	607	628	644	642	561	5643
Arpp19	ENSMUSG00000007656,13	0.0642865	7.23569	0.559278	0.602324	0.96692	-8.43499	0.0480661	7.19896	0.459433	0.666879	0.83941	-8.06095	-0.0197005	7.25232	-0.309141	0.770589	0.877329	-8.3853	4275	5416	5506	5112	5216	5543	5018	4756	4446	45288
Arpp21	ENSMUSG00000032503,18	-0.173387	5.0516	-1.86019	0.127562	0.96692	-6.82364	-0.244054	4.9883	-1.8504	0.128751	0.276881	-6.43514	-0.0743684	4.92182	-0.72499	0.503296	0.669774	-7.84756	1322	1205	1093	1158	1023	1035	1073	849	865	9623
Arrb1	ENSMUSG00000018909,15	0.106503	7.65596	4.42697	0.00839458	0.96692	-4.02225	0.00510681	7.57723	0.101061	0.923771	0.961456	-8.2107	-0.105239	7.65123	-2.0555	0.0992451	0.207643	-6.66439	6381	6762	6783	7396	6981	7161	6190	5876	6128	59658
Arrb2	ENSMUSG00000060216,15	0.0119915	5.20119	0.160048	0.87969	0.96692	-8.39314	-0.091195	5.12161	-1.07739	0.334702	0.578751	-7.37429	-0.107005	5.14816	-1.83622	0.130173	0.260891	-6.64157	1366	1182	1213	1312	1201	1289	1109	1029	1069	10770
Arrdc1	ENSMUSG00000026972,15	0.0415305	3.83739	0.588023	0.584429	0.96692	-8.04559	0.081877	3.82984	1.51154	0.196223	0.399677	-6.73665	0.0363954	3.87102	0.457028	0.668213	0.801844	-7.86877	487	486	470	529	522	444	479	448	463	4328
Arrdc2	ENSMUSG00000002910,11	-0.125925	2.09991	-0.926439	0.400612	0.96692	-7.48594	-0.174157	2.0459	-1.57822	0.18058	0.371881	-6.36891	-0.050961	2.00408	-0.481463	0.651996	0.790884	-7.47065	168	155	136	128	153	141	130	130	109	1250
Arrdc3	ENSMUSG00000074794,10	0.0743449	5.43421	0.309288	0.770733	0.96692	-8.37608	0.200191	5.46774	0.751777	0.488955	0.707014	-7.71239	0.123145	5.52666	0.677403	0.530391	0.693999	-7.96473	1030	1608	1795	1419	1730	1437	1334	1947	1306	13606
Arrdc4	ENSMUSG00000042659,15	0.094041	5.26834	4.26528	0.00916565	0.96692	-3.91027	-0.0137104	5.18589	-0.340504	0.748519	0.889497	-7.94035	-0.111024	5.25371	-2.89614	0.0370117	0.201968	-5.2861	1232	1270	1321	1403	1325	1369	1196	1219	1036	11371
Arsa	ENSMUSG00000022620,14	0.0728724	4.59508	1.34586	0.241399	0.96692	-7.41189	0.0578035	4.55905	0.83157	0.446785	0.692601	-7.55551	-0.0182278	4.61593	-0.322576	0.761019	0.870426	-8.04474	787	851	778	910	802	840	787	832	674	7261
Arsb	ENSMUSG00000042082,7	-0.0597834	4.53577	-0.680642	0.529115	0.96692	-8.06547	0.0427701	4.55904	0.438142	0.681151	0.847119	-7.83286	0.0990027	4.54956	0.942421	0.392343	0.590776	-7.60448	759	781	892	898	719	731	700	875	710	7065
Arsg	ENSMUSG00000020604,13	0.136384	1.88105	1.51172	0.196531	0.96692	-6.79382	0.229728	1.89783	0.879747	0.422708	0.67644	-7.11518	0.0913269	1.98618	0.344981	0.745168	0.858009	-7.53302	119	114	126	148	136	114	105	192	102	1156
Arsi	ENSMUSG00000036412,5	-0.197258	2.2779	-0.38573	0.717034	0.96692	-7.90956	0.0982186	2.39614	0.143705	0.891834	0.951523	-7.62972	0.294569	2.31385	0.453547	0.670542	0.803369	-7.55754	312	126	142	229	169	95	104	403	120	1700
Arsj	ENSMUSG00000046561,9	0.050859	1.7554	0.499844	0.640364	0.96692	-7.74814	-0.145877	1.62658	-0.911305	0.4075	0.663255	-7.0326	-0.198975	1.67313	-1.22943	0.277497	0.457727	-6.73567	122	105	112	114	110	129	85	119	78	974
Arsk	ENSMUSG00000021592,17	0.17045	3.30724	0.83068	0.44746	0.96692	-7.78266	0.214357	3.30071	0.938374	0.39481	0.650944	-7.3023	0.0408562	3.40695	0.224895	0.831612	0.916155	-7.87985	243	347	382	401	300	387	289	427	307	3083
Art3	ENSMUSG00000034842,16	0.382177	4.83802	1.43303	0.216704	0.96692	-7.33513	0.213332	4.72582	0.908583	0.408795	0.664779	-7.50292	-0.17262	4.93768	-1.07653	0.334374	0.525595	-7.5236	627	861	1159	1374	898	1137	849	1023	847	8775
Art4	ENSMUSG00000030217,2	-0.0186017	2.24624	-0.230609	0.827606	0.96692	-7.96085	0.0436256	2.24958	0.464289	0.663646	0.837435	-7.4876	0.0580848	2.26125	1.12275	0.316029	0.504127	-6.9918	160	146	184	170	159	155	160	147	151	1432
Arv1	ENSMUSG00000031982,5	0.173485	2.98075	1.53402	0.191156	0.96692	-6.96755	0.062046	2.89697	0.535631	0.617159	0.806503	-7.55997	-0.114995	3.00401	-2.06525	0.0980648	0.205359	-5.99505	237	295	233	304	268	290	259	237	227	2350
Arvcf	ENSMUSG00000000325,16	-0.0140933	6.48411	-0.100682	0.924079	0.975745	-8.53712	-0.0733481	6.42641	-0.464296	0.663642	0.837435	-7.99368	-0.0629422	6.43979	-0.74855	0.490251	0.65711	-8.02362	3677	2919	2704	3082	3119	2964	2918	2452	2620	26455
Arxes1	ENSMUSG00000048355,2	-0.088767	4.30224	-0.45588	0.669362	0.96692	-8.18294	-0.0565368	4.28941	-0.298738	0.778202	0.908047	-7.86399	0.0288835	4.26681	0.225736	0.830995	0.916155	-8.02496	535	750	833	614	626	735	697	579	555	5924
Arxes2	ENSMUSG00000048040,8	0.0263834	4.90727	0.102563	0.922667	0.974971	-8.37009	0.0906629	4.91046	0.363121	0.73265	0.878863	-7.9042	0.0608947	4.94558	0.484633	0.649908	0.789491	-8.0143	708	1128	1307	965	997	1166	1118	947	898	9234
As3mt	ENSMUSG00000003559,8	-0.0422003	4.41054	-0.683953	0.527205	0.96692	-8.04842	0.00965719	4.40826	0.204408	0.846796	0.933868	-7.90576	0.048293	4.40782	0.8177	0.453393	0.640864	-7.69781	691	740	782	767	740	653	716	685	626	6400
Asah1	ENSMUSG00000031591,14	0.00103184	6.04381	0.00740397	0.994405	0.998181	-8.49788	0.0869908	6.05827	0.560449	0.601446	0.796588	-7.90511	0.0826627	6.07979	0.86998	0.426953	0.623175	-7.87477	1833	2412	2583	2377	2078	2348	2023	2536	2008	20198
Asah2	ENSMUSG00000024887,10	0.120513	4.06391	0.965391	0.382726	0.96692	-7.76092	-0.0477597	3.95099	-0.40009	0.707045	0.862249	-7.78278	-0.171467	4.03244	-2.05978	0.0987254	0.20661	-6.1894	478	530	647	617	541	640	484	534	432	4903
Asap1	ENSMUSG00000022377,16	-0.21554	8.27309	-0.790569	0.468306	0.96692	-8.36469	0.0133854	8.36007	0.156307	0.882438	0.947272	-8.2623	0.225034	8.27232	0.800768	0.46222	0.64434	-8.1953	10971	11920	11306	11748	12551	6464	11713	9732	10042	96447
Asap2	ENSMUSG00000052632,16	0.0850091	4.70501	1.11134	0.321571	0.96692	-7.68778	-0.0293164	4.62039	-0.32371	0.760397	0.897488	-7.89062	-0.118466	4.68341	-1.16329	0.300939	0.486503	-7.39556	801	899	898	1014	825	933	717	776	825	7688
Asap3	ENSMUSG00000036995,7	-0.158449	3.28288	-1.13837	0.311234	0.96692	-7.47575	-0.13405	3.26729	-1.05257	0.344821	0.592226	-7.18302	0.0207559	3.20765	0.201649	0.848717	0.916155	-7.84719	407	325	327	366	309	277	276	327	272	2886
Asb1	ENSMUSG00000026311,16	0.130219	5.80773	0.933007	0.397549	0.96692	-7.98775	0.0738516	5.75147	0.534573	0.617834	0.806916	-7.89392	-0.0603196	5.83775	-0.722112	0.504906	0.67108	-7.96988	1494	1979	2066	2026	1867	2147	1764	1690	1803	16836
Asb13	ENSMUSG00000033781,7	-0.322763	3.46031	-3.1998	0.0273462	0.96692	-4.92818	0.00155496	3.59443	0.0278177	0.978977	0.991104	-7.8326	0.320636	3.45361	3.59462	0.0177163	0.201968	-4.17413	395	407	461	375	290	352	381	408	360	3429
Asb2	ENSMUSG00000021200,14	-0.863905	1.51245	-1.71402	0.152844	0.96692	-6.45619	-0.113765	1.85765	-0.174174	0.869156	0.941232	-7.52277	0.749097	1.44296	1.10166	0.324366	0.513926	-6.81598	198	81	141	105	84	42	68	257	75	1051
Asb3	ENSMUSG00000020305,13	0.122168	3.77344	0.541013	0.613867	0.96692	-8.0673	0.118227	3.74219	0.5251	0.623899	0.810464	-7.6898	-0.00671164	3.82507	-0.0778845	0.941161	0.963734	-7.98128	319	527	531	468	481	520	453	489	388	4176
Asb4	ENSMUSG00000042607,15	0.00931983	1.24451	0.0321975	0.975676	0.998181	-7.78853	-0.056261	1.18479	-0.160268	0.879489	0.946138	-7.39215	-0.0700115	1.21227	-0.334091	0.752855	0.863937	-7.3511	55	79	118	83	74	87	53	79	83	711
Asb6	ENSMUSG00000039483,10	-0.0822638	4.17224	-1.08985	0.330008	0.96692	-7.64791	-0.121064	4.12479	-1.17502	0.297384	0.530079	-7.16492	-0.0425252	4.10397	-0.558783	0.602155	0.75325	-7.84687	692	614	598	642	581	580	594	502	498	5301
Asb7	ENSMUSG00000030509,17	0.131959	4.08714	0.858441	0.433455	0.96692	-7.86423	0.0460255	4.01562	0.299123	0.777926	0.907878	-7.83254	-0.0893306	4.10296	-2.47322	0.0599042	0.201968	-5.66124	436	609	640	608	611	611	515	554	494	5078
Asb8	ENSMUSG00000048175,13	0.0617291	5.09958	0.863957	0.430714	0.96692	-7.97644	0.0275576	5.05454	0.402335	0.705504	0.861325	-7.9006	-0.0379797	5.10614	-0.694747	0.520401	0.684883	-7.89617	1040	1217	1189	1266	1115	1227	1053	1067	1069	10243
Ascc1	ENSMUSG00000044475,14	0.014531	4.76526	0.199231	0.85066	0.96692	-8.33647	0.0484759	4.75412	0.712883	0.51054	0.72726	-7.67432	0.0305131	4.78165	0.5226	0.625193	0.76995	-7.96959	971	931	873	1019	941	857	846	947	819	8204
Ascc2	ENSMUSG00000020412,16	0.00159029	4.69842	0.0377923	0.971452	0.998181	-8.35212	-0.0628684	4.63866	-0.761275	0.483785	0.702583	-7.62353	-0.0686375	4.66007	-0.786614	0.469697	0.64434	-7.76073	866	859	935	957	891	828	726	766	828	7656
Ascc3	ENSMUSG00000038774,9	0.0349084	5.46316	0.318875	0.763908	0.96692	-8.37559	0.104706	5.46942	0.914091	0.406179	0.6619	-7.56982	0.0665282	5.50791	1.4756	0.20437	0.380875	-7.14388	1254	1637	1605	1544	1528	1522	1546	1522	1310	13468
Asf1a	ENSMUSG00000019857,7	-0.0365415	4.14742	-0.186258	0.860243	0.96692	-8.26695	0.0889399	4.18143	0.462348	0.664937	0.838396	-7.77867	0.122228	4.18472	1.56217	0.183382	0.348156	-6.85294	462	657	756	599	560	644	572	658	553	5461
Asf1b	ENSMUSG00000005470,8	-0.154766	1.9557	-0.583436	0.587262	0.96692	-7.7363	0.129755	2.07164	0.622856	0.56304	0.771271	-7.35634	0.280445	2.01355	1.18546	0.292888	0.476318	-6.86627	112	136	178	174	117	97	121	169	131	1235
Asgr1	ENSMUSG00000020884,15	-0.352024	1.28981	-0.561575	0.600882	0.96692	-7.61151	0.0486621	1.46131	0.0649688	0.950935	0.976287	-7.4614	0.400607	1.29944	0.431371	0.68547	0.814191	-7.32823	133	75	84	138	95	30	48	260	54	917
Ash1l	ENSMUSG00000028053,13	0.0302285	6.58648	0.389695	0.714296	0.96692	-8.46269	0.0102591	6.54753	0.160511	0.879308	0.946035	-8.11665	-0.0229171	6.58363	-0.243803	0.817777	0.908725	-8.32664	3249	3275	3219	3179	3624	3208	3107	3258	2597	28716
Ash2l	ENSMUSG00000031575,18	-0.0211712	5.84205	-0.19409	0.854454	0.96692	-8.45401	-0.0322241	5.8081	-0.333835	0.753226	0.892758	-8.00062	-0.0146562	5.81867	-0.22156	0.834059	0.916155	-8.23797	1699	2133	2119	1908	1883	2074	1825	1737	1707	17085
Asic1	ENSMUSG00000023017,10	-0.00632713	6.6011	-0.058508	0.955821	0.995298	-8.55315	-0.0714913	6.54041	-0.580237	0.589095	0.790608	-7.93389	-0.0689245	6.55782	-0.530651	0.620022	0.766201	-8.19328	3494	2977	3529	3608	2893	3511	3363	2657	2665	28697
Asic2	ENSMUSG00000020704,13	0.0300331	6.28357	0.579134	0.589927	0.96692	-8.32545	-0.01353	6.23355	-0.140596	0.894155	0.952412	-8.09325	-0.047265	6.2694	-0.500303	0.639641	0.781896	-8.17587	2527	2779	2599	2686	2732	2681	2675	2174	2298	23151
Asic3	ENSMUSG00000038276,12	0.0554899	5.72227	0.487889	0.648179	0.96692	-8.3229	-0.0847727	5.62402	-0.508219	0.634793	0.818807	-7.89798	-0.143971	5.67229	-0.945514	0.390917	0.589173	-7.75229	1849	1904	1572	1865	1702	1979	1837	1308	1453	15469
Asl	ENSMUSG00000025533,15	0.051818	5.30987	0.328561	0.757037	0.96692	-8.35547	-0.0470913	5.23214	-0.331717	0.754725	0.893751	-7.94825	-0.102309	5.27832	-1.14476	0.30782	0.494415	-7.49688	1592	1259	1176	1433	1511	1225	1257	1175	1087	11715
Asna1	ENSMUSG00000052456,9	-0.0823413	6.08011	-0.42032	0.693321	0.96692	-8.39602	-0.0675995	6.05945	-0.348039	0.743215	0.886135	-8.01719	0.0111753	6.0384	0.141216	0.893614	0.938927	-8.28322	3088	2074	2101	2409	2349	2023	2245	2007	1950	20246
Asns	ENSMUSG00000029752,12	0.0700394	7.07253	0.544465	0.611675	0.96692	-8.42794	0.055533	7.03694	0.396225	0.709702	0.864047	-8.07933	-0.0183507	7.09319	-0.198588	0.850978	0.916155	-8.40004	3710	4851	5015	4627	4623	4951	4646	3928	4186	40537
Asnsd1	ENSMUSG00000026095,15	0.0904609	2.88201	1.75737	0.144846	0.96692	-6.67104	0.00470135	2.81079	0.0435707	0.96708	0.984412	-7.71349	-0.0889638	2.87624	-0.797677	0.463845	0.64434	-7.44135	240	249	242	287	241	255	200	266	206	2186
Aspa	ENSMUSG00000020774,9	0.0452355	3.27518	0.281895	0.790368	0.96692	-8.12167	-0.0444742	3.20245	-0.287841	0.786021	0.91177	-7.72708	-0.0933396	3.24571	-0.743665	0.492935	0.659767	-7.56172	269	330	387	392	290	336	263	331	271	2869
Asph	ENSMUSG00000028207,18	0.0331287	6.03184	0.266968	0.801144	0.96692	-8.45357	0.0826187	6.02828	0.673063	0.533329	0.746927	-7.82446	0.0459659	6.06575	1.34267	0.241221	0.419829	-7.37382	1827	2323	2539	2432	2139	2248	2162	2257	1975	19902
Asphd1	ENSMUSG00000046378,11	-0.0705151	2.39759	-0.653968	0.544671	0.96692	-7.77261	-0.130234	2.33948	-0.779288	0.474093	0.693914	-7.28482	-0.0638091	2.32592	-0.38276	0.718773	0.837768	-7.59452	163	185	206	171	166	192	186	129	149	1547
Asphd2	ENSMUSG00000029348,11	0.0978639	4.29329	1.93482	0.116373	0.96692	-6.64086	0.00389063	4.21828	0.0739425	0.944173	0.972818	-7.90656	-0.0977819	4.28798	-1.52949	0.191043	0.360309	-6.9087	647	659	635	696	726	665	593	578	600	5799
Aspm	ENSMUSG00000033952,14	0.0583783	3.98669	0.388371	0.715209	0.96692	-8.17756	0.00300391	3.93172	0.0174187	0.986835	0.993912	-7.87605	-0.0594191	3.98108	-0.332439	0.754024	0.86476	-7.94427	514	469	619	682	501	498	400	574	493	4750
Aspn	ENSMUSG00000021388,14	0.105778	4.96427	0.463065	0.664575	0.96692	-8.25506	0.407193	5.08522	1.06301	0.340534	0.586406	-7.38571	0.299076	5.16006	0.924172	0.40084	0.598109	-7.70621	818	925	1430	1041	1209	1090	894	1995	1064	10466
Aspscr1	ENSMUSG00000025142,18	-0.0205841	4.80214	-0.423966	0.690845	0.96692	-8.25731	0.0890471	4.82851	1.33304	0.244916	0.464027	-7.0616	0.10633	4.83874	2.07121	0.0973509	0.204041	-6.29441	993	968	919	988	952	910	1008	948	836	8522
Asrgl1	ENSMUSG00000024654,8	0.0817634	4.90843	2.11826	0.0930655	0.96692	-6.47346	-0.0745221	4.80229	-1.62422	0.170521	0.353635	-6.70496	-0.159937	4.86371	-2.73212	0.0445041	0.201968	-5.44057	980	993	1018	1142	984	1057	817	923	847	8761
Ass1	ENSMUSG00000076441,9	0.135124	4.94107	1.63718	0.168147	0.96692	-7.09568	0.107988	4.89882	1.03002	0.354244	0.604758	-7.40161	-0.0303606	4.98711	-0.468338	0.66068	0.796565	-8.02879	1069	884	1061	1152	1057	1104	1069	1033	854	9283
Aste1	ENSMUSG00000032567,16	0.0897478	2.54303	0.533572	0.618607	0.96692	-7.88	-0.00934525	2.4662	-0.0491032	0.962904	0.982287	-7.65312	-0.103477	2.53244	-1.11888	0.317666	0.5062	-7.05626	148	212	227	217	195	206	186	158	180	1729
Astn1	ENSMUSG00000026587,15	0.124955	7.43014	2.37371	0.0686133	0.96692	-6.40335	-0.0127527	7.33287	-0.0916343	0.930856	0.965227	-8.19225	-0.141466	7.41638	-0.95975	0.38441	0.582026	-7.95149	5530	5524	5873	5988	6168	6384	6190	4407	4824	50888
Astn2	ENSMUSG00000028373,16	0.01842	4.91589	0.466769	0.662114	0.96692	-8.24775	-0.0341716	4.86171	-0.361716	0.733631	0.879635	-7.89982	-0.056595	4.89158	-0.633366	0.556342	0.717282	-7.91217	1067	996	1011	1068	1035	1022	987	826	925	8937
Asxl1	ENSMUSG00000042548,14	0.123651	5.75387	2.8908	0.0380933	0.96692	-5.57544	-0.029914	5.64913	-0.484678	0.650166	0.829803	-7.91385	-0.15746	5.73177	-3.09914	0.0296369	0.201968	-5.09593	1640	1799	1865	2001	1935	1861	1559	1554	1609	15823
Asxl2	ENSMUSG00000037486,18	0.0882983	4.55666	0.9021	0.41213	0.96692	-7.88046	-0.0417704	4.46316	-0.342969	0.746782	0.888559	-7.86624	-0.133354	4.52825	-1.87879	0.123461	0.249375	-6.50056	668	857	826	851	820	825	637	782	655	6921
Asxl3	ENSMUSG00000045215,16	0.0823813	5.80652	0.82762	0.449025	0.96692	-8.08427	0.0242265	5.74889	0.209939	0.842722	0.933868	-8.03565	-0.0616922	5.81123	-0.571906	0.593928	0.74715	-8.07467	1636	1980	1977	1910	2116	1907	1969	1609	1601	16705
Atad1	ENSMUSG00000013662,6	0.117048	6.79179	0.600618	0.576695	0.96692	-8.36299	0.15966	6.78418	0.891122	0.417175	0.672668	-7.70665	0.039243	6.86426	0.342121	0.747184	0.859491	-8.32634	2788	4025	4269	3717	3750	4453	4099	3676	3338	34115
Atad2	ENSMUSG00000022360,8	-0.217987	4.52229	-1.46595	0.208028	0.96692	-7.25988	-0.0613327	4.57321	-0.372374	0.726201	0.874037	-7.86554	0.152728	4.48453	0.901697	0.411511	0.608526	-7.63361	720	891	945	876	624	712	618	860	757	7003
Atad2b	ENSMUSG00000052812,5	0.0725288	4.91432	0.665388	0.537973	0.96692	-8.11978	0.0429819	4.87117	0.423398	0.691126	0.852645	-7.87234	-0.0331158	4.92861	-0.679893	0.528949	0.692758	-7.88337	854	1061	1116	1055	1022	1106	933	972	919	9038
Atad3a	ENSMUSG00000029036,18	-0.0692555	4.79115	-0.377441	0.722773	0.96692	-8.278	-0.10802	4.7442	-0.620648	0.564371	0.772523	-7.74123	-0.0426905	4.72936	-0.391361	0.712825	0.833629	-8.03175	1209	881	854	1055	942	799	890	773	794	8197
Atad5	ENSMUSG00000017550,14	-0.0204068	3.28209	-0.123138	0.90724	0.96692	-8.16151	0.0279126	3.27836	0.166319	0.874989	0.943492	-7.77189	0.0446845	3.28907	0.733602	0.498499	0.665208	-7.57892	260	365	393	365	319	311	295	338	299	2945
Atat1	ENSMUSG00000024426,17	0.0587386	4.87032	1.24201	0.274305	0.96692	-7.56279	-0.0454519	4.79039	-0.726333	0.502999	0.720191	-7.66732	-0.10805	4.8403	-2.09003	0.0951327	0.201968	-6.26964	958	1031	949	1077	979	1016	869	843	877	8599
Atcay	ENSMUSG00000034958,11	0.0327319	7.08573	0.250951	0.812766	0.96692	-8.56621	-0.021488	7.03045	-0.154858	0.883517	0.94791	-8.15814	-0.0578518	7.06735	-0.739999	0.494957	0.661774	-8.10638	5416	4265	4181	4710	4931	4502	4452	3877	4026	40360
Ate1	ENSMUSG00000030850,17	0.0573525	6.02284	0.471351	0.659077	0.96692	-8.36353	0.0600267	5.99565	0.525046	0.623934	0.81049	-7.92152	-0.000812416	6.04551	-0.0183719	0.986105	0.991896	-8.29597	1812	2374	2396	2237	2246	2344	2124	2112	1961	19606
Atf1	ENSMUSG00000023027,13	0.0660997	3.19471	0.674706	0.53255	0.96692	-7.89293	-0.107661	3.07879	-0.733237	0.499161	0.716747	-7.44852	-0.176584	3.1326	-1.49724	0.198911	0.37257	-6.74586	278	288	355	355	308	302	250	314	217	2667
Atf2	ENSMUSG00000027104,18	0.0958496	6.33412	0.643729	0.550723	0.96692	-8.28614	0.0237274	6.26958	0.160187	0.87955	0.946166	-8.09284	-0.0756904	6.33879	-1.34167	0.24152	0.420258	-7.40862	2126	2900	3068	2814	2820	2952	2367	2627	2409	24083
Atf4	ENSMUSG00000042406,8	-0.00810312	7.01577	-0.0953062	0.928117	0.978068	-8.59175	-0.0465901	6.96824	-0.564196	0.599095	0.79562	-7.98025	-0.0420625	6.98488	-0.688526	0.523969	0.688241	-8.13679	4861	4198	4268	4442	4216	4628	4134	3814	3773	38334
Atf5	ENSMUSG00000038539,15	-0.241615	4.77399	-1.67247	0.160934	0.96692	-7.03243	-0.134129	4.79995	-0.898149	0.413786	0.66907	-7.51989	0.103655	4.69916	1.18032	0.294738	0.478794	-7.37964	1218	909	948	972	824	800	934	801	798	8204
Atf6	ENSMUSG00000026663,6	0.164549	5.31125	2.30515	0.0744017	0.96692	-6.27443	0.0751262	5.23821	0.989695	0.371641	0.626209	-7.47503	-0.0928981	5.34133	-2.38428	0.0666952	0.201968	-5.95252	1145	1309	1401	1517	1368	1443	1202	1329	1157	11871
Atf6b	ENSMUSG00000015461,15	-0.033073	5.33399	-0.515342	0.630313	0.96692	-8.26578	-0.000815493	5.32209	-0.0107974	0.991839	0.996028	-8.02292	0.0284613	5.32622	0.509316	0.633778	0.776889	-8.05102	1496	1315	1375	1391	1397	1315	1229	1277	1296	12091
Atf7	ENSMUSG00000099083,7	0.105459	5.36208	1.00444	0.365464	0.96692	-7.87066	0.0326239	5.2974	0.296472	0.779825	0.908852	-7.96771	-0.0762034	5.37079	-1.15059	0.305639	0.491882	-7.50272	1161	1479	1446	1596	1353	1449	1219	1408	1165	12276
Atf7ip	ENSMUSG00000030213,12	0.045489	6.60859	1.05497	0.344112	0.96692	-7.9491	-0.0112044	6.552	-0.23844	0.821827	0.931052	-8.09826	-0.0602526	6.59548	-1.85981	0.126407	0.254208	-6.7941	3067	3419	3368	3536	3411	3258	3119	2972	2802	28952
Atg10	ENSMUSG00000021619,6	0.167913	3.31378	1.62858	0.169955	0.96692	-6.90182	0.184027	3.29323	1.79206	0.138398	0.294016	-6.31174	0.0129361	3.39816	0.233132	0.825576	0.914257	-7.87586	278	358	329	367	342	375	323	362	309	3043
Atg101	ENSMUSG00000037204,7	-0.144699	3.68172	-0.897618	0.41428	0.96692	-7.77578	-0.100873	3.67554	-0.547621	0.609537	0.802573	-7.66691	0.0400041	3.62327	0.422218	0.691681	0.818567	-7.8439	573	418	408	443	398	414	449	362	366	3831
Atg12	ENSMUSG00000032905,5	0.112079	7.27718	1.37803	0.231985	0.96692	-7.65601	0.0806825	7.2329	1.17137	0.29871	0.531811	-7.45887	-0.0349148	7.31009	-0.4775	0.654611	0.792774	-8.31437	4627	5298	5395	5304	5513	5790	5262	4818	4646	46653
Atg13	ENSMUSG00000027244,14	0.0764939	5.34173	1.30812	0.252901	0.96692	-7.53854	0.0322877	5.29162	0.540745	0.613901	0.805021	-7.84767	-0.0479007	5.35051	-1.66759	0.160267	0.310909	-6.88405	1238	1441	1375	1512	1408	1367	1246	1283	1236	12106
Atg14	ENSMUSG00000037526,7	-0.0249753	3.83688	-0.755321	0.486816	0.96692	-7.92156	0.035729	3.83911	0.863448	0.430442	0.685005	-7.44509	0.0570568	3.8474	1.8442	0.127643	0.256368	-6.43883	464	497	516	506	484	467	447	481	449	4311
Atg16l1	ENSMUSG00000026289,15	0.0794034	5.1109	1.17545	0.297533	0.96692	-7.66351	0.00920629	5.04759	0.176055	0.86776	0.940527	-7.97789	-0.0738045	5.10801	-1.1871	0.292301	0.475552	-7.42795	1129	1206	1111	1224	1291	1143	1091	1036	1027	10258
Atg16l2	ENSMUSG00000047767,17	0.0322906	2.47836	0.246819	0.815774	0.96692	-7.99961	-0.026934	2.4228	-0.183477	0.862259	0.937011	-7.62637	-0.0643383	2.4591	-0.371999	0.726248	0.843663	-7.62945	171	205	189	214	209	160	167	148	192	1655
Atg2a	ENSMUSG00000024773,15	0.0382368	5.10833	0.981025	0.375735	0.96692	-7.86656	-0.056285	5.03284	-1.26285	0.267061	0.487171	-7.16271	-0.0982214	5.07281	-1.63745	0.166878	0.321643	-6.88546	1158	1149	1180	1196	1241	1160	1070	984	999	10137
Atg2b	ENSMUSG00000041341,10	0.143244	5.45025	2.03884	0.102479	0.96692	-6.63538	0.065892	5.38321	1.2047	0.286802	0.515106	-7.26176	-0.080932	5.4758	-1.28205	0.26005	0.436623	-7.36922	1312	1479	1477	1563	1673	1496	1421	1337	1303	13061
Atg3	ENSMUSG00000022663,3	0.0268157	5.99192	0.241681	0.819518	0.96692	-8.45716	-0.0309923	5.93423	-0.218152	0.836684	0.933868	-8.05009	-0.0609386	5.96833	-0.526073	0.622959	0.768397	-8.12319	2443	2045	1999	2146	2325	2142	2265	1869	1661	18895
Atg4a	ENSMUSG00000079418,3	0.152465	3.28576	0.790666	0.468255	0.96692	-7.81402	0.230318	3.2956	1.35134	0.239435	0.455555	-6.85687	0.0747802	3.39383	0.804476	0.460276	0.64434	-7.54036	241	359	362	324	385	351	351	345	315	3033
Atg4b	ENSMUSG00000026280,17	0.109914	5.6455	4.34441	0.008806	0.96692	-3.88758	0.0227753	5.57384	0.523458	0.624954	0.811208	-7.88449	-0.0909205	5.64959	-1.84159	0.129306	0.259275	-6.70002	1611	1665	1661	1805	1798	1747	1546	1487	1531	14851
Atg4c	ENSMUSG00000028550,15	0.0903851	4.27925	0.365557	0.731038	0.96692	-8.22374	0.110586	4.26072	0.484471	0.650303	0.829844	-7.77558	0.0165184	4.32803	0.111608	0.915793	0.947317	-8.05741	460	747	769	605	689	779	671	580	646	5946
Atg4d	ENSMUSG00000002820,6	-0.0369883	3.64571	-0.618166	0.566029	0.96692	-7.99939	0.0302487	3.65077	0.463014	0.664495	0.838062	-7.71318	0.0639704	3.65296	1.48387	0.202268	0.377615	-6.86186	460	422	417	425	428	417	391	436	380	3776
Atg5	ENSMUSG00000038160,7	-0.0524994	5.14346	-0.62441	0.562265	0.96692	-8.17448	0.0633185	5.17243	1.05132	0.345339	0.593005	-7.40644	0.112602	5.1675	1.4176	0.219729	0.39587	-7.16958	1144	1217	1332	1117	1220	1238	1245	1205	1061	10779
Atg7	ENSMUSG00000030314,16	0.111509	4.11043	2.64889	0.0499098	0.96692	-5.69612	-0.00931255	4.02195	-0.2197	0.835513	0.933868	-7.85785	-0.124496	4.09824	-2.63508	0.0497307	0.201968	-5.45278	538	577	588	669	582	598	546	513	481	5092
Atg9a	ENSMUSG00000033124,15	0.236532	5.36162	2.44589	0.0630507	0.96692	-6.09777	0.0965448	5.2633	0.962768	0.383653	0.639771	-7.50389	-0.143536	5.4026	-3.41608	0.0212293	0.201968	-4.67272	1109	1393	1400	1541	1548	1503	1213	1334	1231	12272
Atg9b	ENSMUSG00000038295,14	-0.00514989	2.00603	-0.0465191	0.964865	0.998181	-7.94512	0.0819952	2.02023	0.732796	0.499405	0.716917	-7.26442	0.0840848	2.03948	0.914918	0.405207	0.601721	-7.15012	124	130	159	133	148	131	126	150	121	1222
Atic	ENSMUSG00000026192,13	0.111169	5.78861	1.61762	0.172285	0.96692	-7.21116	0.0773525	5.74351	1.04297	0.348809	0.597799	-7.46802	-0.0375529	5.82003	-0.656564	0.542568	0.705027	-8.01745	1657	1950	1854	1961	1948	2002	1799	1690	1744	16605
Atl1	ENSMUSG00000021066,9	0.0314801	7.33931	0.549975	0.608187	0.96692	-8.45127	-0.0271821	7.28182	-0.21155	0.841537	0.933868	-8.16611	-0.0625418	7.31844	-0.47878	0.653766	0.792223	-8.31461	5278	5760	5386	5508	5628	5712	5661	4233	4866	48032
Atl2	ENSMUSG00000059811,13	0.0397359	5.82324	0.275701	0.794833	0.96692	-8.42897	0.0287508	5.78915	0.22224	0.833684	0.933868	-8.03609	-0.0144618	5.83032	-0.218325	0.836436	0.916155	-8.2403	1560	2008	2212	1940	1855	2122	1819	1830	1665	17011
Atl3	ENSMUSG00000024759,14	0.0908653	6.23506	0.418926	0.694269	0.96692	-8.41272	0.174892	6.24842	0.806848	0.459545	0.692601	-7.73619	0.0806213	6.31528	1.15094	0.305509	0.491768	-7.62203	1797	2827	3045	2653	2542	2813	2459	2841	2401	23378
Atm	ENSMUSG00000034218,16	0.0649319	4.86633	0.535918	0.617111	0.96692	-8.2022	0.136463	4.8726	1.40974	0.22271	0.436614	-6.97534	0.0687349	4.92666	0.553916	0.605224	0.755485	-7.97047	920	919	1090	918	1116	1046	1028	1073	834	8944
Atmin	ENSMUSG00000047388,10	0.158923	5.88569	2.69589	0.0473237	0.96692	-5.83368	0.0474521	5.80193	0.631787	0.557676	0.766953	-7.83427	-0.115313	5.90221	-2.21669	0.081541	0.201968	-6.24287	1734	2019	1993	2209	2138	2082	1863	1730	1801	17569
Atn1	ENSMUSG00000004263,15	0.0124535	2.41478	0.0961497	0.927484	0.977808	-8.01923	-0.076879	2.34019	-0.592158	0.581731	0.785742	-7.4264	-0.0921201	2.36852	-0.824193	0.450043	0.637411	-7.30706	155	183	208	171	183	197	175	161	134	1567
Atox1	ENSMUSG00000018585,9	-0.00977827	5.05094	-0.172459	0.870468	0.96692	-8.37428	0.0611104	5.05804	0.948187	0.39029	0.646702	-7.49832	0.0675716	5.07361	1.2909	0.257219	0.436623	-7.30626	1197	1079	1135	1216	1131	1056	1074	1185	983	10056
Atp10a	ENSMUSG00000025324,8	0.052364	2.21669	0.332896	0.753971	0.96692	-7.92075	0.139307	2.23035	0.509144	0.634193	0.818277	-7.45902	0.0849582	2.27682	0.280021	0.791494	0.891471	-7.62416	160	145	162	176	188	128	123	238	128	1448
Atp10b	ENSMUSG00000055415,8	0.245012	3.81793	1.40962	0.223085	0.96692	-7.24099	0.148099	3.74241	0.778359	0.47459	0.694348	-7.50663	-0.101552	3.8859	-0.941492	0.392772	0.591025	-7.50244	344	463	542	586	519	479	450	411	481	4275
Atp10d	ENSMUSG00000046808,17	-0.0751461	1.43309	-0.345147	0.745332	0.96692	-7.75765	-0.0281819	1.42611	-0.176803	0.867205	0.94025	-7.43779	0.0441353	1.4117	0.280226	0.791345	0.891403	-7.41977	74	109	103	75	103	94	89	86	77	810
Atp11a	ENSMUSG00000031441,15	0.0404162	7.73809	0.959643	0.385323	0.96692	-8.15812	0.00207092	7.69065	0.0366691	0.972291	0.987362	-8.22502	-0.0420149	7.73166	-0.771584	0.477735	0.645176	-8.15845	7400	6859	7326	7473	7547	7261	6979	6341	6354	63540
Atp11b	ENSMUSG00000037400,17	0.0972321	6.0371	0.515	0.630533	0.96692	-8.34008	-0.00488692	5.95753	-0.0267133	0.979812	0.991364	-8.08056	-0.105617	6.02744	-2.02011	0.103659	0.215706	-6.51559	1639	2577	2411	2271	2291	2431	1972	2031	1897	19520
Atp11c	ENSMUSG00000062949,13	0.0687464	5.76155	0.343868	0.746232	0.96692	-8.3973	0.0735586	5.73486	0.409075	0.700887	0.858591	-7.96108	0.00168248	5.79082	0.013255	0.989974	0.99404	-8.26402	1393	2090	2030	1753	1820	2171	1927	1755	1533	16472
Atp13a1	ENSMUSG00000031862,11	0.0878064	5.05911	2.13558	0.0911395	0.96692	-6.46751	-0.0234016	4.9759	-0.267078	0.801002	0.919094	-7.94656	-0.115333	5.04044	-1.42982	0.216404	0.391996	-7.13747	1045	1162	1109	1240	1151	1146	984	933	1054	9824
Atp13a2	ENSMUSG00000036622,15	0.0222168	7.78959	0.33599	0.751785	0.96692	-8.60648	-0.00275578	7.74917	-0.0313409	0.976316	0.989529	-8.22982	-0.0287818	7.78078	-0.436473	0.68202	0.811324	-8.39096	8061	7370	7104	7945	7690	7316	7159	6428	6867	65940
Atp13a3	ENSMUSG00000022533,14	0.122	6.12575	0.680625	0.529125	0.96692	-8.23747	0.178224	6.1249	0.936585	0.395639	0.651768	-7.60745	0.0531648	6.20731	0.542191	0.612655	0.760382	-8.14327	1749	2535	2691	2433	2433	2637	2250	2752	2101	21581
Atp13a5	ENSMUSG00000048939,13	-0.279467	3.49373	-0.536733	0.616591	0.96692	-8.03072	0.149299	3.67703	0.158049	0.881141	0.946771	-7.82898	0.430161	3.55361	0.450659	0.672475	0.805131	-7.81593	721	331	321	606	312	225	251	1582	192	4541
Atp1a1	ENSMUSG00000033161,10	0.0105366	9.44079	0.140436	0.894307	0.96692	-8.82171	-0.0426112	9.38604	-0.343553	0.746371	0.8883	-8.27978	-0.0568054	9.41192	-0.547689	0.609164	0.758271	-8.50642	25862	22859	22390	24238	23593	23937	24055	18884	20072	205890
Atp1a2	ENSMUSG00000007097,14	-0.221985	8.13664	-0.573992	0.593122	0.96692	-8.5145	0.0639565	8.25148	0.13089	0.90141	0.953511	-8.2586	0.284458	8.15898	0.55931	0.601824	0.752985	-8.36351	14815	8981	8450	13586	8710	6005	7456	18959	6779	93741
Atp1a3	ENSMUSG00000040907,15	0.0457693	9.7283	0.422544	0.69181	0.96692	-8.75408	-0.144125	9.60555	-0.975102	0.378111	0.6344	-7.8397	-0.193821	9.64884	-1.69231	0.1558	0.303325	-7.3521	32633	25820	27548	31712	27415	29684	26358	20728	23712	245610
Atp1b1	ENSMUSG00000026576,12	0.0072968	9.65818	0.104788	0.920996	0.973977	-8.84754	-0.0417976	9.60517	-0.427042	0.688654	0.851414	-8.25684	-0.0526616	9.62973	-0.45274	0.671081	0.803895	-8.58373	26793	26835	29012	27981	25605	29943	28359	22824	22237	239589
Atp1b2	ENSMUSG00000041329,13	0.0908641	5.59936	0.620086	0.56487	0.96692	-8.22637	0.0955942	5.57303	0.378088	0.722233	0.871662	-7.96073	0.00233402	5.63826	0.00861533	0.993484	0.996053	-8.24464	1745	1513	1567	2125	1439	1648	1360	2305	1205	14907
Atp1b3	ENSMUSG00000032412,8	0.12739	7.83001	0.572479	0.594064	0.96692	-8.48547	0.169146	7.82227	0.776427	0.475623	0.695475	-7.89145	0.0381007	7.90745	0.707817	0.512959	0.6785	-8.22994	5305	8579	9023	7902	8214	8373	7918	7675	7243	70232
Atp1b4	ENSMUSG00000016327,9	-1.82702	1.12596	-1.45334	0.211311	0.96692	-6.66565	0.485671	2.25319	0.316038	0.76585	0.901221	-7.55479	2.31067	1.36371	1.43875	0.214004	0.391996	-6.3499	103	46	571	53	31	37	39	779	186	1845
Atp23	ENSMUSG00000025436,12	0.00633758	1.98068	0.0526195	0.960262	0.998087	-7.93978	0.0101986	1.95395	0.0712828	0.946176	0.973816	-7.55705	0.000503149	1.97846	0.00690469	0.994777	0.996717	-7.60206	118	125	163	143	131	132	115	141	114	1182
Atp2a1	ENSMUSG00000030730,12	-1.56849	2.07641	-1.53497	0.190931	0.96692	-6.77291	0.656366	3.15933	0.444709	0.676732	0.845527	-7.65009	2.2234	2.39813	1.42903	0.216617	0.391996	-6.60776	233	84	770	100	86	68	77	1597	363	3378
Atp2a2	ENSMUSG00000029467,15	0.0805567	8.26454	0.692929	0.522054	0.96692	-8.44271	0.0292896	8.2107	0.239625	0.820962	0.930585	-8.23118	-0.0551603	8.27205	-0.981583	0.374604	0.572572	-8.02819	8524	10831	11538	11022	10475	11058	9871	9151	9450	91920
Atp2b1	ENSMUSG00000019943,10	0.0427763	8.5254	0.480174	0.653251	0.96692	-8.60917	-0.0107671	8.47014	-0.0752604	0.94318	0.972283	-8.28186	-0.0572531	8.51265	-0.433542	0.684001	0.812966	-8.47474	10948	12912	13481	12553	12583	13370	13445	10008	10432	109732
Atp2b2	ENSMUSG00000030302,16	-0.0581885	7.30137	-0.633399	0.556875	0.96692	-8.39161	-0.161565	7.22142	-0.98224	0.374935	0.630501	-7.65532	-0.107198	7.21314	-0.712717	0.510189	0.675964	-8.14521	6095	5054	5393	5179	5431	5299	5421	3812	4326	46010
Atp2b3	ENSMUSG00000031376,15	-0.0295355	5.18937	-0.148099	0.88859	0.96692	-8.39409	-0.11734	5.11707	-0.524561	0.624245	0.810671	-7.84066	-0.0914118	5.12287	-0.781398	0.472475	0.64434	-7.82878	1648	1041	1163	1218	1290	1208	1239	957	991	10755
Atp2b4	ENSMUSG00000026463,17	0.126727	7.62208	0.934058	0.397061	0.96692	-8.17129	0.0120563	7.53632	0.0823508	0.937841	0.969444	-8.20953	-0.118532	7.62102	-1.02556	0.355488	0.551198	-7.90993	5344	7006	7125	6657	7503	7054	6560	5356	5871	58476
Atp2c1	ENSMUSG00000032570,17	0.101208	7.49468	0.517145	0.629149	0.96692	-8.48681	0.0548442	7.44299	0.277495	0.793473	0.91573	-8.15976	-0.0501571	7.51505	-0.542463	0.612482	0.760382	-8.30026	4447	6838	6910	6107	6441	6694	6128	5278	5492	54335
Atp5a1	ENSMUSG00000025428,15	0.0553806	9.19496	3.74231	0.0150156	0.96692	-4.87639	0.0541582	9.16605	2.07358	0.0974988	0.216832	-6.48853	-0.00465504	9.21443	-0.192931	0.855158	0.916162	-8.63982	19216	19787	19925	21248	20427	19822	18352	19821	17541	176139
Atp5b	ENSMUSG00000025393,12	0.0124296	9.74136	0.437012	0.68202	0.96692	-8.74803	0.0501928	9.73191	1.33145	0.245398	0.464782	-7.46205	0.0343894	9.75876	1.49964	0.198316	0.371675	-7.60481	29916	28311	29140	30674	29107	28702	28551	28555	25277	258233
Atp5c1	ENSMUSG00000025781,14	0.0243708	7.56466	0.832771	0.446393	0.96692	-8.25875	0.128223	7.58781	1.97144	0.110913	0.244345	-6.5051	0.100803	7.62088	1.50739	0.196401	0.368647	-7.3626	6274	6367	6598	6538	6540	6568	6445	7156	5608	58094
Atp5d	ENSMUSG00000003072,15	0.0530842	7.2175	0.408517	0.701368	0.96692	-8.51765	0.0218532	7.17359	0.158448	0.880844	0.946672	-8.16922	-0.0343965	7.22036	-0.616858	0.566283	0.726033	-8.21684	5941	4528	4626	5641	4999	4978	4617	5111	4145	44586
Atp5e	ENSMUSG00000016252,7	-0.082976	5.84022	-0.506075	0.636312	0.96692	-8.32482	0.143073	5.92474	0.679033	0.529868	0.743529	-7.81081	0.223084	5.90349	1.58634	0.177913	0.339422	-7.05746	2495	1700	1927	2079	1888	1770	1800	2552	1798	18009
Atp5f1	ENSMUSG00000000563,17	-0.0776965	7.6942	-2.05038	0.10105	0.96692	-6.84954	0.0198682	7.71434	0.364521	0.731672	0.878203	-8.14798	0.0942636	7.69643	1.64831	0.164625	0.318017	-7.19554	7081	7075	7658	6901	6825	7021	7251	6907	6005	62724
Atp5g1	ENSMUSG00000006057,15	-0.0623794	5.46307	-0.808318	0.458993	0.96692	-8.06478	0.118559	5.52486	1.34852	0.240272	0.456788	-7.11019	0.177646	5.51453	2.70071	0.046125	0.201968	-5.56725	1663	1410	1555	1460	1483	1498	1669	1533	1371	13642
Atp5g2	ENSMUSG00000062683,11	0.00426198	2.3513	0.0238747	0.981962	0.998181	-8.01265	-0.154107	2.24397	-0.783037	0.472094	0.692601	-7.26398	-0.161619	2.26545	-1.02095	0.35745	0.553172	-7.09736	213	151	163	203	149	176	125	175	130	1485
Atp5g3	ENSMUSG00000018770,9	-0.00934341	7.92727	-0.180489	0.864515	0.96692	-8.6682	0.0191204	7.91291	0.276282	0.794348	0.916169	-8.19707	0.0253089	7.92895	0.528214	0.621584	0.767345	-8.35679	8822	7892	8337	8456	8197	8313	7836	8421	6880	73154
Atp5h	ENSMUSG00000034566,10	-0.0511901	6.83645	-1.03697	0.351594	0.96692	-7.99077	0.0438102	6.85537	0.510177	0.633524	0.817855	-8.00416	0.0919304	6.85029	1.33597	0.243238	0.422586	-7.4777	4202	3854	3875	4049	3789	3719	4036	3995	3202	34721
Atp5j	ENSMUSG00000022890,13	-0.0922086	6.86712	-1.29408	0.257314	0.96692	-7.71302	0.0572984	6.91273	0.676528	0.531318	0.7449	-7.89753	0.146604	6.88781	1.42044	0.218953	0.394766	-7.3819	3979	4029	4348	3657	4050	3940	4258	4203	3297	35761
Atp5j2	ENSMUSG00000038690,15	0.0139947	6.9449	0.108471	0.918233	0.972323	-8.58297	0.0374351	6.92785	0.234966	0.824365	0.932818	-8.13087	0.0206314	6.95525	0.226413	0.830498	0.916155	-8.3765	4993	3784	3890	4427	4246	4069	4184	4388	3246	37227
Atp5k	ENSMUSG00000050856,16	-0.189388	6.68695	-0.657427	0.542636	0.96692	-8.31221	-0.0755163	6.7153	-0.250981	0.812685	0.925704	-8.10833	0.111001	6.64062	1.23741	0.274782	0.454371	-7.56589	5647	2954	3186	3513	3268	3151	3596	3492	2711	31518
Atp5l	ENSMUSG00000038717,8	-0.14881	3.1124	-0.932583	0.397746	0.96692	-7.65944	0.0516891	3.1829	0.680886	0.528797	0.742889	-7.50574	0.197718	3.13036	1.27062	0.263753	0.440409	-7.01597	330	308	294	235	305	311	318	288	273	2662
Atp5md	ENSMUSG00000071528,4	-0.0591763	5.76521	-0.312672	0.768322	0.96692	-8.40988	0.20889	5.8693	1.27651	0.262609	0.480662	-7.22495	0.265673	5.86151	1.29042	0.257373	0.436623	-7.40901	1618	2046	2054	1556	1772	2217	2304	2182	1568	17317
Atp5mpl	ENSMUSG00000021290,6	0.0599034	6.61852	1.2579	0.269012	0.96692	-7.72923	0.101688	6.61078	1.14096	0.309961	0.546876	-7.44044	0.0387854	6.66124	0.527451	0.622074	0.767694	-8.20793	3467	3178	3225	3640	3326	3362	3395	3549	2736	29878
Atp5o	ENSMUSG00000022956,11	0.0170266	6.42551	0.477269	0.655166	0.96692	-8.40182	0.0724475	6.42462	1.19541	0.290078	0.519728	-7.36494	0.0522213	6.45385	1.11861	0.317769	0.506309	-7.67392	3011	2777	2973	3049	2925	2923	2938	2985	2477	26058
Atp6ap1	ENSMUSG00000019087,13	0.0908902	7.78944	1.77472	0.141768	0.96692	-7.21506	0.0259312	7.72878	0.483411	0.651	0.830256	-8.09011	-0.0686303	7.79502	-2.10528	0.0933739	0.201968	-6.61591	6783	7737	7481	8013	7877	7608	6932	6763	6657	65851
Atp6ap2	ENSMUSG00000031007,2	0.1273	6.90133	0.701144	0.517369	0.96692	-8.30114	0.139701	6.87892	0.811613	0.457064	0.692601	-7.78565	0.00882408	6.96398	0.123432	0.906924	0.942489	-8.39925	2991	4358	4568	4149	4134	4592	4135	3913	3709	36549
Atp6v0a1	ENSMUSG00000019302,16	0.105753	8.44321	1.20972	0.285359	0.96692	-7.96474	-0.0276528	8.34833	-0.230067	0.827949	0.933868	-8.24419	-0.137314	8.42219	-1.33776	0.242698	0.421822	-7.65709	10107	12320	12086	12397	11911	12867	11385	9231	10191	102495
Atp6v0a2	ENSMUSG00000038023,12	0.0854902	5.07733	1.58744	0.178873	0.96692	-7.17293	0.0229216	5.0181	0.351987	0.740444	0.884446	-7.91943	-0.0664027	5.08163	-1.13714	0.31069	0.49769	-7.47905	1036	1134	1193	1253	1120	1208	990	1062	1054	10050
Atp6v0b	ENSMUSG00000033379,13	-0.0140977	5.88483	-0.295638	0.780493	0.96692	-8.42858	0.172894	5.94964	5.74233	0.00283403	0.129487	-2.19046	0.183738	5.96353	3.60781	0.0174847	0.201968	-4.52073	2039	2006	2038	1965	2027	2059	2164	2172	1911	18381
Atp6v0c	ENSMUSG00000024121,13	0.14861	6.82426	2.42698	0.0644578	0.96692	-6.27375	-0.0259263	6.70888	-0.388683	0.714899	0.866827	-8.05546	-0.178194	6.80381	-4.2445	0.0095555	0.201968	-3.9205	3888	3676	3477	4133	4112	4030	3280	3281	3294	33171
Atp6v0d1	ENSMUSG00000013160,7	0.120773	7.7083	2.73831	0.0451174	0.96692	-5.96449	0.0869616	7.6632	2.08313	0.0967638	0.215275	-6.36581	-0.0374378	7.74435	-1.21238	0.283376	0.464114	-7.72453	6468	7175	6928	7649	7587	7210	6631	6732	6499	62879
Atp6v0e	ENSMUSG00000015575,15	-0.0858663	4.40363	-1.34972	0.240248	0.96692	-7.38511	0.210664	4.52276	0.987873	0.372444	0.627186	-7.40536	0.294165	4.50015	1.41274	0.221067	0.397893	-7.08269	788	705	743	775	661	681	701	1095	624	6773
Atp6v0e2	ENSMUSG00000039347,7	0.024194	7.74318	0.87794	0.423826	0.96692	-8.23581	-0.00597311	7.69991	-0.145976	0.890139	0.9505	-8.21362	-0.0338195	7.73272	-0.803874	0.460591	0.64434	-8.13133	7323	7249	7201	7550	7259	7424	6870	6441	6424	63741
Atp6v1a	ENSMUSG00000052459,13	0.125236	8.08019	0.675221	0.532252	0.96692	-8.43809	0.124764	8.05133	0.726291	0.503023	0.720206	-7.94994	-0.00423172	8.1355	-0.0444836	0.966366	0.980466	-8.54353	6814	9872	10293	8981	9786	10382	9205	8488	8663	82484
Atp6v1b2	ENSMUSG00000006273,14	0.131786	8.13201	1.08377	0.332429	0.96692	-8.07104	0.0904253	8.083	0.761317	0.483763	0.702583	-7.92407	-0.0451253	8.17004	-0.751355	0.488714	0.655889	-8.22498	7642	10112	9920	9851	10007	10371	9026	8717	8864	84510
Atp6v1c1	ENSMUSG00000022295,8	0.0648926	6.2004	0.600564	0.576728	0.96692	-8.30257	0.0467655	6.16301	0.403575	0.704653	0.860839	-8.00173	-0.0217185	6.21641	-0.472933	0.657633	0.794889	-8.18476	2064	2663	2693	2666	2509	2566	2494	2281	2160	22096
Atp6v1d	ENSMUSG00000021114,9	0.0582694	6.65745	1.72491	0.150794	0.96692	-7.16532	0.0842022	6.64184	0.890218	0.417613	0.673118	-7.69549	0.0225734	6.69182	0.229758	0.828046	0.916031	-8.34384	3315	3423	3399	3529	3487	3583	3799	3124	2912	30571
Atp6v1e1	ENSMUSG00000019210,10	-0.0192823	7.75972	-0.141185	0.893748	0.96692	-8.65938	-0.0282564	7.72656	-0.167797	0.873891	0.942856	-8.21155	-0.0118804	7.73731	-0.119754	0.909681	0.944275	-8.49066	8898	7081	6574	7524	7427	7198	7677	6843	5579	64801
Atp6v1f	ENSMUSG00000004285,12	-0.0658373	6.09223	-0.273082	0.796724	0.96692	-8.45783	-0.01145	6.09072	-0.045488	0.965632	0.983597	-8.09149	0.0514471	6.07804	0.631162	0.557662	0.71819	-8.06821	3345	2011	2016	2316	2352	2193	2388	2256	1843	20720
Atp6v1g1	ENSMUSG00000039105,6	-0.0557756	5.49283	-1.04297	0.349084	0.96692	-7.84558	0.0379161	5.51082	0.49108	0.645965	0.826894	-7.89761	0.0905004	5.50402	1.13133	0.312894	0.500421	-7.54112	1503	1525	1680	1483	1520	1542	1632	1494	1285	13664
Atp6v1g2	ENSMUSG00000024403,16	-0.0494749	5.87441	-0.711017	0.511778	0.96692	-8.18808	-0.0710647	5.83466	-0.74864	0.490671	0.708683	-7.74823	-0.0245519	5.8308	-0.212929	0.840404	0.916155	-8.24174	2031	2024	2059	1969	1833	2143	2011	1841	1481	17392
Atp6v1h	ENSMUSG00000033793,12	0.0592047	7.38621	0.360589	0.734506	0.96692	-8.5563	0.102812	7.37935	0.635692	0.555341	0.764956	-7.96545	0.0401382	7.43026	0.516138	0.62936	0.773297	-8.30643	4392	6235	6399	5712	5662	6218	5990	5434	5022	51064
Atp7a	ENSMUSG00000033792,12	0.0809807	4.32622	1.13779	0.311452	0.96692	-7.61537	0.0442733	4.2788	0.342694	0.746976	0.888675	-7.84622	-0.0394687	4.34021	-0.31233	0.768313	0.875611	-8.00806	612	677	712	723	748	654	588	769	537	6020
Atp8a1	ENSMUSG00000037685,15	0.118049	8.02746	0.91227	0.407285	0.96692	-8.23187	0.0379697	7.95891	0.230591	0.827565	0.933868	-8.21452	-0.0838215	8.03917	-0.590093	0.582644	0.739898	-8.3298	7193	9470	9183	8878	9166	9967	9524	7051	7596	78028
Atp8a2	ENSMUSG00000021983,16	0.0659602	7.97651	0.968754	0.381213	0.96692	-8.17268	-0.0582885	7.88613	-0.576801	0.591228	0.791595	-8.04554	-0.128008	7.93993	-1.18353	0.293582	0.47728	-7.77883	8781	7989	8474	8754	9400	8391	8320	6685	7130	73924
Atp8b1	ENSMUSG00000039529,9	0.36135	1.33185	2.10802	0.0942254	0.96692	-5.91912	0.0059351	1.12634	0.0230299	0.982595	0.992232	-7.39558	-0.358862	1.32824	-1.8904	0.121692	0.246162	-5.83959	58	81	91	107	89	97	53	88	70	734
Atp8b2	ENSMUSG00000060671,12	0.0364407	6.01998	0.741452	0.494814	0.96692	-8.17913	0.0233289	5.98565	0.576503	0.591414	0.791709	-7.88828	-0.017003	6.02435	-0.290594	0.783878	0.886322	-8.24269	2098	2198	2274	2489	2202	2087	1993	2044	2036	19421
Atp8b3	ENSMUSG00000003341,9	-0.190445	2.16181	-1.25379	0.270374	0.96692	-7.15409	-0.124278	2.16674	-0.793598	0.466497	0.692601	-7.24105	0.0623588	2.09173	1.09604	0.326584	0.516702	-6.98117	196	136	162	153	134	143	147	134	127	1332
Atp9a	ENSMUSG00000027546,15	0.0174738	8.40923	0.168225	0.873611	0.96692	-8.71783	-0.0526268	8.34625	-0.477262	0.655052	0.832954	-8.14074	-0.0738204	8.37539	-1.1411	0.309198	0.495996	-7.8743	13037	11174	10564	12228	12051	10947	10516	9706	10173	100396
Atp9b	ENSMUSG00000024566,10	0.118429	5.68087	1.74984	0.146204	0.96692	-7.03263	-0.0233861	5.5822	-0.461146	0.665738	0.838949	-7.92065	-0.145677	5.66181	-2.09048	0.0950798	0.201968	-6.37745	1586	1751	1713	2046	1808	1663	1573	1472	1474	15086
Atpaf1	ENSMUSG00000028710,17	0.141254	3.33811	1.05049	0.345961	0.96692	-7.57685	-0.0116526	3.23299	-0.0745671	0.943702	0.972619	-7.77836	-0.156148	3.32512	-1.62543	0.169409	0.325735	-6.62477	285	308	403	370	342	381	269	343	282	2983
Atpaf2	ENSMUSG00000042709,14	-0.0346172	3.9345	-0.406636	0.702656	0.96692	-8.16238	0.00669353	3.9267	0.0733633	0.944609	0.973023	-7.87235	0.0381531	3.9297	0.689575	0.523366	0.687758	-7.72775	515	583	491	556	485	514	491	529	432	4596
Atpif1	ENSMUSG00000054428,12	-0.100784	8.42753	-0.367413	0.729745	0.96692	-8.6557	-0.0224972	8.43809	-0.0745092	0.943746	0.972623	-8.27954	0.0755448	8.40771	0.516257	0.629283	0.773255	-8.4178	17785	10442	9742	11883	11988	10394	13353	10990	8818	105395
Atpsckmt	ENSMUSG00000039065,11	0.106526	2.74456	0.803736	0.461383	0.96692	-7.71571	0.0437022	2.6863	0.508739	0.634456	0.818506	-7.5405	-0.0670788	2.75932	-0.57909	0.589455	0.744781	-7.58194	202	245	216	278	242	200	203	208	209	2003
Atr	ENSMUSG00000032409,15	0.058682	4.32544	0.377601	0.722662	0.96692	-8.22401	0.201228	4.36841	1.34342	0.241791	0.459031	-7.00125	0.13879	4.41924	1.5144	0.194687	0.365887	-6.94749	539	761	734	661	711	735	713	672	721	6247
Atraid	ENSMUSG00000013622,15	0.0909572	4.91619	0.814077	0.456001	0.96692	-8.00041	0.187553	4.93612	1.64087	0.16702	0.347165	-6.69756	0.0933173	5.00228	1.25694	0.268245	0.446112	-7.33557	850	1075	1091	1168	1076	970	1035	1157	925	9347
Atrip	ENSMUSG00000025646,9	0.0561944	3.56643	0.616086	0.567287	0.96692	-7.98988	0.079426	3.55039	0.895663	0.414982	0.670305	-7.37785	0.0193392	3.599	0.338555	0.7497	0.861483	-7.87698	353	438	403	448	415	381	370	391	383	3582
Atrn	ENSMUSG00000027312,14	0.12836	7.03071	1.73714	0.148523	0.96692	-7.18745	0.0277765	6.95221	0.262901	0.804028	0.920814	-8.12453	-0.104415	7.03738	-1.23057	0.277108	0.457263	-7.62113	3797	4485	4575	4714	4734	4620	4387	3654	3881	38847
Atrnl1	ENSMUSG00000054843,9	0.145003	8.61437	1.40858	0.223372	0.96692	-7.75083	0.0697203	8.54833	0.574587	0.592606	0.792655	-8.09707	-0.0790725	8.64197	-0.979626	0.375474	0.573389	-8.07094	10883	13258	14289	14012	14338	14067	13488	11406	11675	117416
Atrx	ENSMUSG00000031229,16	-0.0637158	7.44176	-0.990284	0.371645	0.96692	-8.09861	-0.0317673	7.42899	-0.443343	0.67765	0.845969	-8.08792	0.0286147	7.41822	0.297946	0.7786	0.882773	-8.40892	5935	6035	6243	5538	6116	5862	6095	5275	4898	51997
Atxn1	ENSMUSG00000046876,16	-0.0996483	4.01885	-0.670265	0.53513	0.96692	-8.0109	-0.0395983	4.02056	-0.289186	0.785054	0.911085	-7.83637	0.0563503	3.99203	0.576846	0.59085	0.745966	-7.8177	469	631	634	526	593	496	545	484	494	4872
Atxn10	ENSMUSG00000016541,10	0.144409	8.40774	1.88231	0.124132	0.96692	-7.13712	0.0814508	8.34801	1.05971	0.341884	0.588292	-7.66491	-0.0665944	8.44107	-3.52595	0.0186357	0.201968	-4.89536	9751	11879	11596	12574	12161	12012	10785	10786	10302	101846
Atxn1l	ENSMUSG00000069895,4	0.128037	5.20217	1.67744	0.159945	0.96692	-7.07352	-0.0207232	5.09985	-0.273335	0.796477	0.917087	-7.95666	-0.152524	5.18455	-2.62293	0.0504321	0.201968	-5.62326	1079	1267	1272	1421	1219	1326	1034	1127	1077	10822
Atxn2	ENSMUSG00000042605,16	0.0625087	7.11682	0.738483	0.496451	0.96692	-8.29351	-0.0662516	7.02416	-0.536518	0.616593	0.806106	-8.00224	-0.132071	7.07572	-1.36161	0.235608	0.411748	-7.47421	5113	4515	4329	5253	4761	4598	4701	3929	3542	40741
Atxn2l	ENSMUSG00000032637,15	0.0100607	6.81148	0.132853	0.899972	0.96692	-8.56589	-0.101538	6.72786	-1.15204	0.305818	0.541477	-7.43816	-0.115334	6.75314	-1.63135	0.168158	0.323705	-7.10528	3950	3999	3541	4240	3710	3668	3514	3081	3148	32851
Atxn3	ENSMUSG00000021189,11	0.0102167	4.57855	0.0560227	0.957695	0.996501	-8.33737	0.017189	4.55369	0.0989247	0.925376	0.962323	-7.94072	0.00326862	4.58024	0.0451946	0.965829	0.9801	-8.10087	623	891	966	815	771	885	770	740	736	7197
Atxn7	ENSMUSG00000021738,5	0.0630102	3.73692	0.428961	0.687459	0.96692	-8.1255	0.0395711	3.69716	0.274029	0.795975	0.916795	-7.80142	-0.0270387	3.74942	-0.700983	0.51678	0.681772	-7.68861	370	538	443	486	440	476	416	425	408	4002
Atxn7l1	ENSMUSG00000020564,17	-0.0606562	3.89825	-1.22303	0.280753	0.96692	-7.46855	-0.0185546	3.89038	-0.416999	0.695449	0.855354	-7.76731	0.0389938	3.88105	0.616585	0.566448	0.726134	-7.77267	517	509	533	492	525	485	493	492	418	4464
Atxn7l2	ENSMUSG00000048997,17	0.0476999	2.77377	0.449954	0.673324	0.96692	-7.96814	-0.121703	2.66248	-0.70367	0.51575	0.731686	-7.40287	-0.174172	2.70703	-1.26025	0.267153	0.44475	-6.9377	206	266	220	243	235	236	194	166	220	1986
Atxn7l3	ENSMUSG00000059995,12	0.0675662	6.99502	1.32527	0.247612	0.96692	-7.68975	-0.0142837	6.92586	-0.276208	0.794402	0.916169	-8.11802	-0.0854371	6.98038	-1.99992	0.106269	0.220451	-6.65821	4261	4425	4089	4479	4487	4469	3961	3786	3757	37714
Atxn7l3b	ENSMUSG00000074748,3	0.0557003	7.801	0.303501	0.774865	0.96692	-8.61998	0.0908923	7.78999	0.518009	0.628462	0.813953	-8.07492	0.0316417	7.83917	0.55207	0.60639	0.755802	-8.33183	5680	8377	8757	7683	7469	8273	7494	7451	6793	67977
AU020206	ENSMUSG00000097415,2	-0.17171	0.931293	-1.5169	0.195269	0.96692	-6.58805	0.160222	1.06912	0.463314	0.664294	0.83791	-7.2571	0.328844	1.00459	0.954091	0.386985	0.584757	-6.86429	60	69	78	63	66	55	44	103	75	613
AU021092	ENSMUSG00000051669,6	0.400331	1.79753	3.16242	0.0284416	0.96692	-4.68332	0.202248	1.66954	0.887438	0.418961	0.673805	-7.06401	-0.200477	1.88898	-0.812641	0.456017	0.642981	-7.20535	103	100	106	169	126	119	92	155	87	1057
AU022252	ENSMUSG00000078584,9	0.0883054	6.06469	2.11264	0.0937004	0.96692	-6.60392	0.0319986	6.00839	0.57138	0.594604	0.793497	-7.89364	-0.0599033	6.07306	-1.40367	0.223582	0.401781	-7.30224	2306	2191	2158	2490	2339	2275	2206	2030	1958	19953
AU040320	ENSMUSG00000028830,14	0.0258554	5.86543	0.274055	0.796022	0.96692	-8.43392	-0.0166766	5.81606	-0.168892	0.873078	0.942419	-8.05105	-0.0460635	5.8493	-1.00942	0.362406	0.559219	-7.71209	2210	1912	1820	2147	2006	1904	1898	1760	1672	17329
AU041133	ENSMUSG00000078435,5	-0.136559	3.00742	-0.594758	0.580285	0.96692	-7.92013	0.0254519	3.05961	0.118253	0.910872	0.95571	-7.74665	0.158692	3.01382	1.79921	0.136319	0.271688	-6.34306	211	300	374	242	277	271	261	274	264	2474
Auh	ENSMUSG00000021460,17	-0.178711	4.38725	-2.64486	0.0501393	0.96692	-5.73451	-0.0314864	4.43199	-0.311987	0.768735	0.902943	-7.87498	0.144278	4.36324	1.98502	0.10824	0.22387	-6.33885	823	703	759	698	671	654	701	759	580	6348
Aup1	ENSMUSG00000068328,9	-0.0947501	5.1169	-0.67467	0.532571	0.96692	-8.13514	-0.0531488	5.10971	-0.39381	0.711364	0.86514	-7.90986	0.0380099	5.08246	0.75703	0.485616	0.6529	-7.84383	1468	1119	1119	1255	1151	1055	1120	1086	1017	10390
Aurka	ENSMUSG00000027496,15	-0.0617342	2.87231	-0.323786	0.760421	0.96692	-8.04235	0.0298759	2.8908	0.156772	0.882092	0.94723	-7.71309	0.0876565	2.87958	0.415874	0.696003	0.821181	-7.7016	267	214	291	309	242	197	198	296	227	2241
Aurkaip1	ENSMUSG00000065990,12	-0.0832025	5.15196	-0.405731	0.703275	0.96692	-8.30481	-0.0415598	5.14435	-0.196503	0.852626	0.933868	-7.98259	0.0384592	5.1228	0.420031	0.693169	0.819329	-8.07222	1643	1035	1149	1300	1197	1066	1216	1166	948	10720
Aurkb	ENSMUSG00000020897,12	-0.0847245	3.22584	-0.380494	0.720656	0.96692	-8.07525	0.0160213	3.24971	0.0737988	0.944281	0.97286	-7.78103	0.0963	3.22669	0.365894	0.730504	0.846835	-7.79562	336	278	381	418	298	241	236	379	310	2877
Auts2	ENSMUSG00000029673,17	-0.132548	6.26923	-1.78945	0.139207	0.96692	-7.04317	-0.154015	6.23052	-1.03614	0.351666	0.60148	-7.51789	-0.0253306	6.18477	-0.190762	0.856762	0.917137	-8.29147	2971	2760	2560	2589	2470	2520	2666	1943	2215	22694
Aven	ENSMUSG00000003604,14	0.106511	3.06986	1.07946	0.334155	0.96692	-7.50566	-0.0306368	2.97301	-0.339528	0.749207	0.890028	-7.67193	-0.140749	3.04691	-2.18093	0.0851527	0.201968	-5.85249	297	244	290	315	271	311	239	264	235	2466
Avil	ENSMUSG00000025432,11	0.000717827	9.30298	0.00498982	0.99623	0.998181	-8.82065	-0.0849501	9.23227	-0.467177	0.661728	0.836418	-8.21023	-0.0893697	9.25288	-0.660509	0.540248	0.702951	-8.41301	25675	20554	19040	22919	22571	19651	21793	16162	17990	186355
Avl9	ENSMUSG00000029787,10	0.151798	6.23205	0.780197	0.473814	0.96692	-8.1691	0.0820936	6.16851	0.451319	0.672299	0.843425	-7.97835	-0.0732432	6.26596	-0.869779	0.427052	0.623287	-7.89784	1840	2811	2789	2536	2745	2886	2467	2320	2254	22648
Avpi1	ENSMUSG00000018821,3	-0.208071	1.5442	-1.82899	0.132567	0.96692	-6.32557	0.0951662	1.6683	1.10766	0.322713	0.563588	-6.84507	0.299535	1.58364	3.96729	0.0123395	0.201968	-3.36123	119	101	101	106	91	82	106	108	97	911
AW011738	ENSMUSG00000078349,3	0.0243753	2.45874	0.164067	0.876701	0.96692	-8.01653	0.076237	2.45639	0.491595	0.645628	0.826597	-7.50992	0.0485306	2.48951	0.757228	0.485508	0.652815	-7.39159	148	211	205	204	177	189	170	199	167	1670
AW146154	ENSMUSG00000074166,7	0.0709325	1.71917	0.463285	0.664429	0.96692	-7.76113	0.140696	1.72323	1.21933	0.281713	0.507872	-6.73417	0.067367	1.78143	0.464325	0.663348	0.798637	-7.42814	95	112	122	100	121	127	110	125	95	1007
AW209491	ENSMUSG00000039182,6	-0.108032	4.66259	-1.1175	0.319192	0.96692	-7.67636	-0.0389329	4.66854	-0.509692	0.633839	0.818124	-7.80489	0.0658263	4.63524	0.813112	0.455772	0.64286	-7.73487	961	894	842	820	912	782	854	802	732	7599
AW549877	ENSMUSG00000041935,10	0.0636232	7.13969	0.239097	0.821403	0.96692	-8.57513	0.134401	7.14629	0.527444	0.622395	0.80925	-8.01789	0.0673216	7.1997	0.794544	0.465497	0.64434	-8.07713	3188	5798	5648	4692	4772	5407	4972	4790	4370	43637
AW551984	ENSMUSG00000038112,15	0.019203	6.04365	0.2101	0.842653	0.96692	-8.47112	0.0315996	6.02125	0.233182	0.825669	0.933652	-8.05378	0.00909408	6.052	0.0827759	0.937476	0.961348	-8.29284	1963	2273	2510	2266	2227	2342	1837	2456	1996	19870
AW554918	ENSMUSG00000033632,16	0.00332975	4.18656	0.027749	0.979036	0.998181	-8.29237	-0.0626821	4.12496	-0.568557	0.596366	0.793497	-7.70906	-0.0694183	4.14797	-1.33537	0.243419	0.422819	-7.12116	521	658	697	611	612	653	556	554	513	5375
Axin1	ENSMUSG00000024182,16	0.0316416	4.49488	0.271083	0.798168	0.96692	-8.28516	-0.123293	4.3891	-0.94486	0.391818	0.648322	-7.43254	-0.158232	4.42516	-2.75912	0.0431609	0.201968	-5.34406	890	705	704	835	760	751	608	713	592	6558
Axin2	ENSMUSG00000000142,15	-0.206019	2.91122	-1.0628	0.3409	0.96692	-7.49692	-0.202658	2.88476	-0.700299	0.517666	0.733576	-7.44244	0.000619318	2.80032	0.00199363	0.998492	0.999158	-7.78745	313	275	244	311	196	225	165	331	188	2248
Axl	ENSMUSG00000002602,16	0.198857	5.19177	1.30207	0.254793	0.96692	-7.52924	0.114252	5.12202	0.488112	0.647911	0.828144	-7.86268	-0.0884467	5.24165	-0.359844	0.734733	0.850071	-8.11537	1073	1090	1353	1672	1164	1242	856	1496	1181	11127
Azi2	ENSMUSG00000039285,12	0.0157942	6.45809	0.120678	0.909082	0.96692	-8.53178	0.022487	6.4328	0.200463	0.849704	0.933868	-8.09814	0.00313093	6.4621	0.037892	0.971347	0.983595	-8.34683	2511	3180	3331	2843	3043	3225	2901	2720	2662	26416
Azin1	ENSMUSG00000037458,15	0.0634482	7.31213	0.275243	0.795164	0.96692	-8.58124	0.113053	7.30825	0.532012	0.61947	0.807412	-8.02825	0.0459337	7.36159	0.474196	0.656797	0.794277	-8.32234	3829	6016	6488	5280	5262	6236	5456	5199	5027	48793
Azin2	ENSMUSG00000028789,16	0.0165126	4.33113	0.133513	0.899479	0.96692	-8.29943	0.0423149	4.31555	0.361005	0.734128	0.880066	-7.84267	0.0223479	4.34451	0.411877	0.698732	0.823263	-7.96633	797	633	632	674	713	695	664	639	617	6064
B130024G19Rik	ENSMUSG00000100005,7	-0.119414	1.8891	-0.838033	0.443717	0.96692	-7.5254	-0.0906268	1.87511	-0.465984	0.66252	0.836604	-7.4158	0.0261361	1.83475	0.123986	0.906509	0.942234	-7.55902	118	146	132	148	117	103	98	151	95	1108
B130055M24Rik	ENSMUSG00000086502,1	-0.0537403	3.15586	-0.725983	0.503385	0.96692	-7.84745	-0.148064	3.08073	-1.426	0.218258	0.436614	-6.73479	-0.0982565	3.07478	-0.959664	0.384449	0.582064	-7.33466	306	330	294	291	301	307	276	230	259	2594
B230118H07Rik	ENSMUSG00000027165,16	-0.02714	4.57841	-0.426322	0.689247	0.96692	-8.23067	0.108069	4.61692	1.72928	0.149619	0.31508	-6.55343	0.132278	4.62442	1.62774	0.168921	0.324982	-6.83613	836	799	835	775	847	814	855	869	706	7336
B230217C12Rik	ENSMUSG00000050538,8	-0.0163472	3.96933	-0.136613	0.897162	0.96692	-8.25448	-0.0222797	3.93777	-0.185302	0.860908	0.936111	-7.85612	-0.00938069	3.95094	-0.108214	0.918341	0.948951	-7.99878	455	586	582	512	562	529	531	462	455	4674
B230217O12Rik	ENSMUSG00000097785,2	-0.0506956	3.02504	-0.436351	0.682466	0.96692	-8.01708	-0.0435122	2.9995	-0.25735	0.808056	0.922977	-7.70539	0.00397534	2.99469	0.0260539	0.980296	0.989443	-7.82801	320	269	262	273	296	254	311	234	212	2431
B230219D22Rik	ENSMUSG00000045767,9	0.0895994	7.62438	0.478323	0.65447	0.96692	-8.52204	0.0576349	7.57972	0.33268	0.754043	0.893325	-8.15056	-0.0355627	7.64603	-0.481774	0.651791	0.790704	-8.35122	4985	7241	7715	6594	6923	7464	6262	6329	5972	59485
B230307C23Rik	ENSMUSG00000080717,10	0.294521	1.47491	2.68413	0.0479561	0.96692	-5.20888	0.113462	1.35615	1.16346	0.301598	0.535767	-6.72328	-0.184874	1.52474	-1.61154	0.172384	0.330373	-6.24402	87	90	79	97	106	113	85	79	88	824
B230312C02Rik	ENSMUSG00000084843,1	0.136898	1.64844	1.17331	0.298308	0.96692	-7.14178	-0.121737	1.49268	-0.767094	0.480639	0.699709	-7.13345	-0.263309	1.58104	-2.41372	0.0644065	0.201968	-5.22163	119	93	95	120	111	106	85	77	94	900
B230334C09Rik	ENSMUSG00000104597,1	-0.0119902	1.68757	-0.174664	0.868833	0.96692	-7.86394	-0.0236969	1.65397	-0.166689	0.874714	0.943434	-7.48516	-0.015957	1.66897	-0.104715	0.920969	0.950587	-7.52208	110	113	107	107	117	105	115	83	100	957
B230354K17Rik	ENSMUSG00000097119,2	0.0491626	5.25386	0.821853	0.451986	0.96692	-8.0306	0.0660459	5.23391	1.17778	0.296384	0.528909	-7.27744	0.0134937	5.27923	0.320649	0.762388	0.871456	-8.13633	1184	1355	1310	1379	1366	1251	1279	1264	1122	11510
B2m	ENSMUSG00000060802,8	0.0303529	6.95184	0.149317	0.887681	0.96692	-8.57728	0.188891	7.0019	0.84833	0.438291	0.692601	-7.76361	0.155631	7.03859	1.24934	0.270771	0.449304	-7.60026	3164	4315	5357	4240	4043	4615	4352	5191	3607	38884
B3galnt1	ENSMUSG00000043300,2	-0.00761518	5.77903	-0.128232	0.903428	0.96692	-8.4603	0.0524509	5.78018	0.800871	0.462671	0.692601	-7.69993	0.0569601	5.79745	0.796765	0.464325	0.64434	-7.90374	1761	1907	1978	1832	1859	1946	1903	1875	1561	16622
B3galnt2	ENSMUSG00000039242,10	0.0551071	2.98791	0.444221	0.67717	0.96692	-8.00688	-0.0630242	2.90215	-0.366736	0.730128	0.877203	-7.64885	-0.122676	2.95044	-0.918167	0.40367	0.600162	-7.34861	221	280	302	308	259	266	198	242	259	2335
B3galt1	ENSMUSG00000034780,6	0.080703	5.67271	0.423665	0.691049	0.96692	-8.35178	0.0880565	5.6477	0.48361	0.650868	0.830199	-7.9144	0.00387335	5.70951	0.042521	0.967849	0.98143	-8.25269	1287	1928	1956	1730	1718	1961	1788	1609	1527	15504
B3galt2	ENSMUSG00000033849,3	0.0386734	2.34263	0.286674	0.786929	0.96692	-7.96171	0.16159	2.3739	1.20229	0.287647	0.516339	-6.87495	0.120219	2.41552	1.04565	0.34703	0.540741	-7.10767	152	160	203	163	177	189	192	184	147	1567
B3galt4	ENSMUSG00000067370,4	-0.232718	1.62693	-2.48606	0.0601714	0.96692	-5.49306	-0.00499216	1.71341	-0.0476679	0.963987	0.982908	-7.51231	0.223448	1.61753	3.2222	0.0259859	0.201968	-4.22063	125	101	117	103	91	98	105	99	106	945
B3galt5	ENSMUSG00000074892,9	-0.148781	2.21617	-1.27825	0.262371	0.96692	-7.13684	0.0622389	2.29369	0.628326	0.559751	0.768474	-7.39354	0.207013	2.24021	2.39936	0.0655121	0.201968	-5.39486	181	146	175	154	136	164	161	155	159	1431
B3galt6	ENSMUSG00000050796,4	-0.0457695	3.19754	-0.297437	0.779205	0.96692	-8.10435	0.159403	3.27102	1.19792	0.289188	0.518484	-7.02869	0.202043	3.27013	2.28	0.0755474	0.201968	-5.76878	259	338	366	286	315	329	344	324	302	2863
B3gat1	ENSMUSG00000045994,17	-0.174285	3.45498	-1.846	0.129813	0.96692	-6.64602	-0.0866471	3.47121	-0.875114	0.424978	0.678918	-7.38541	0.0837141	3.40449	0.778647	0.473946	0.64434	-7.56425	403	419	372	371	315	378	311	354	359	3282
B3gat2	ENSMUSG00000026156,8	-0.189022	3.83027	-1.54528	0.188501	0.96692	-7.07785	-0.0791424	3.85657	-2.1646	0.0866783	0.19431	-5.90141	0.106431	3.78332	0.889161	0.41756	0.615063	-7.53515	509	495	552	441	405	533	457	452	430	4274
B3gat3	ENSMUSG00000071649,6	-0.0876147	5.30747	-0.714018	0.510087	0.96692	-8.1257	-0.010528	5.31748	-0.0766582	0.942127	0.971865	-8.01897	0.0737923	5.29419	1.07503	0.334977	0.526378	-7.57352	1640	1292	1279	1329	1304	1318	1406	1248	1135	11951
B3glct	ENSMUSG00000051950,10	-0.127636	6.61231	-0.772854	0.477742	0.96692	-8.21427	0.00192	6.64834	0.0139458	0.989459	0.995051	-8.14072	0.126053	6.60601	1.07484	0.335055	0.526472	-7.73881	2862	3942	3771	2921	3161	3588	3441	3059	3058	29803
B3gnt5	ENSMUSG00000022686,14	0.122135	4.1776	0.481061	0.652666	0.96692	-8.15404	0.092721	4.1351	0.330833	0.75535	0.894148	-7.83462	-0.0337584	4.21793	-0.24962	0.813535	0.905903	-8.01048	402	697	739	631	643	669	624	494	617	5516
B3gnt7	ENSMUSG00000079445,3	0.106436	1.72467	0.593181	0.581254	0.96692	-7.68349	0.221007	1.75343	1.89855	0.121318	0.262884	-5.9081	0.111262	1.82641	0.597705	0.57796	0.735769	-7.35799	116	98	112	137	90	130	129	122	96	1030
B3gnt8	ENSMUSG00000059479,7	-0.155778	3.29048	-1.24181	0.274373	0.96692	-7.36254	-0.117229	3.28101	-1.40044	0.225296	0.440743	-6.796	0.0351688	3.22434	0.329731	0.755941	0.866243	-7.80992	388	335	336	291	355	310	304	291	291	2901
B3gnt9	ENSMUSG00000069920,10	-0.0494613	3.17533	-0.431379	0.685823	0.96692	-8.04318	0.140039	3.24073	0.716107	0.508725	0.725555	-7.48752	0.187004	3.23648	1.11583	0.318843	0.507663	-7.20843	350	270	326	324	312	278	283	413	264	2820
B3gntl1	ENSMUSG00000046605,14	-0.152244	2.12432	-0.915428	0.40579	0.96692	-7.50093	0.00841607	2.17566	0.0558064	0.957845	0.97972	-7.59999	0.157965	2.11935	0.961313	0.383701	0.581217	-7.12432	176	157	139	150	162	116	135	173	125	1333
B4galnt1	ENSMUSG00000006731,10	-0.0583745	4.40872	-0.479423	0.653745	0.96692	-8.18289	-0.0986665	4.36038	-0.66322	0.539069	0.751381	-7.67013	-0.0440049	4.35164	-0.494006	0.643756	0.784644	-7.92399	869	693	673	725	706	709	712	580	601	6268
B4galnt3	ENSMUSG00000041372,10	0.114196	2.79112	0.626391	0.561074	0.96692	-7.8624	-0.057742	2.67973	-0.41196	0.698915	0.857482	-7.59068	-0.177309	2.75629	-0.875298	0.424332	0.620785	-7.34678	220	206	258	325	207	222	176	200	223	2037
B4galnt4	ENSMUSG00000055629,5	-0.0138851	5.36887	-0.21923	0.835945	0.96692	-8.39767	-0.0647256	5.31509	-0.661386	0.540143	0.752268	-7.76807	-0.0543514	5.32882	-0.633058	0.556526	0.717407	-7.97108	1477	1447	1334	1411	1398	1421	1399	1160	1155	12202
B4galt1	ENSMUSG00000028413,13	0.137631	4.91689	1.17704	0.296959	0.96692	-7.64036	0.152962	4.89674	0.884178	0.420545	0.675571	-7.54281	0.0116418	4.98617	0.0798686	0.939666	0.962751	-8.15497	831	1053	1087	1216	1058	996	827	1181	1009	9258
B4galt2	ENSMUSG00000028541,14	-0.0588902	5.20838	-0.469611	0.66023	0.96692	-8.27824	-0.0219876	5.19863	-0.186059	0.860347	0.935777	-7.99025	0.0334599	5.18947	0.693076	0.521358	0.685817	-7.90869	1506	1205	1180	1313	1281	1138	1194	1191	1081	11089
B4galt3	ENSMUSG00000052423,14	0.0969989	4.55126	2.8935	0.0377696	0.96692	-5.43853	0.0893647	4.51927	1.89131	0.122406	0.265014	-6.33535	-0.0112677	4.58847	-0.289635	0.784568	0.886796	-8.05279	748	806	769	856	824	814	791	736	722	7066
B4galt4	ENSMUSG00000022793,17	-0.110989	4.09388	-1.64883	0.16573	0.96692	-6.98237	0.0734879	4.15801	1.30174	0.254571	0.47801	-7.02617	0.181031	4.12275	3.50004	0.0194858	0.201968	-4.39619	612	631	576	616	560	517	577	624	541	5254
B4galt5	ENSMUSG00000017929,13	-0.00474011	6.25533	-0.120829	0.908969	0.96692	-8.51091	-0.0631302	6.19846	-0.590473	0.582769	0.786467	-7.89768	-0.0625313	6.21669	-0.58552	0.585468	0.741927	-8.11653	2488	2717	2641	2781	2593	2480	2476	2018	2363	22557
B4galt6	ENSMUSG00000056124,5	0.05953	6.87097	0.295496	0.780595	0.96692	-8.52994	0.0360038	6.83068	0.175809	0.867942	0.940645	-8.13741	-0.0272407	6.88187	-0.252786	0.81123	0.904296	-8.36006	2917	4469	4601	3981	3890	4450	4117	3414	3468	35307
B4galt7	ENSMUSG00000021504,14	-0.121491	3.37618	-1.70075	0.155382	0.96692	-6.82028	-0.0249368	3.39681	-0.3455	0.745001	0.887368	-7.73404	0.0925072	3.35637	1.33877	0.242392	0.421428	-6.98145	394	350	366	368	346	311	347	318	327	3127
B630019K06Rik	ENSMUSG00000052364,4	0.0195811	4.44723	0.0876513	0.933872	0.981655	-8.31939	-0.00283537	4.40719	-0.013902	0.989493	0.995051	-7.93082	-0.0256793	4.43865	-0.251171	0.812406	0.905126	-8.04335	541	866	862	710	710	848	712	679	626	6554
B930095G15Rik	ENSMUSG00000085133,2	0.138496	4.11953	0.986384	0.373364	0.96692	-7.74713	-0.0303376	4.00743	-0.153876	0.884249	0.948243	-7.87088	-0.173069	4.09753	-1.13721	0.310663	0.49767	-7.33618	458	609	648	684	574	622	613	429	487	5124
B9d1	ENSMUSG00000001039,12	-0.0174013	1.82152	-0.205968	0.845694	0.96692	-7.88388	0.033396	1.81742	0.425641	0.689604	0.851872	-7.42604	0.0478816	1.83013	0.457126	0.668148	0.801801	-7.44343	122	115	126	115	132	114	107	129	103	1063
B9d2	ENSMUSG00000063439,7	-0.0547276	2.71906	-0.234803	0.824539	0.96692	-8.046	-0.163358	2.63692	-0.715513	0.509059	0.725833	-7.38895	-0.112588	2.62924	-1.00721	0.36336	0.56038	-7.19318	308	206	189	229	244	193	201	175	182	1927
Baalc	ENSMUSG00000022296,9	0.129488	3.19889	1.95912	0.112958	0.96692	-6.46199	0.0799457	3.14525	3.78668	0.0139428	0.129487	-3.77856	-0.0527644	3.23116	-0.790323	0.467729	0.64434	-7.52053	300	296	302	316	322	350	298	296	270	2750
Babam1	ENSMUSG00000031820,9	-0.0120144	5.2774	-0.16044	0.879398	0.96692	-8.40134	0.051522	5.28073	0.643313	0.550804	0.76156	-7.77804	0.0602488	5.29523	2.13746	0.0892373	0.201968	-6.26729	1457	1288	1254	1364	1304	1305	1309	1311	1147	11739
Babam2	ENSMUSG00000052139,18	0.146888	4.88173	1.20452	0.287177	0.96692	-7.60601	0.1195	4.8395	0.932578	0.3975	0.653855	-7.49173	-0.0306013	4.93375	-0.568581	0.596006	0.748712	-7.96187	798	1087	1009	1117	1077	1000	997	1009	839	8933
Bace1	ENSMUSG00000032086,12	0.126563	7.02475	3.39151	0.0224367	0.96692	-5.10032	0.0633585	6.96489	1.29405	0.256997	0.479708	-7.29879	-0.066872	7.04903	-1.8953	0.120954	0.244856	-6.80263	4004	4230	4553	4798	4607	4597	4267	4000	3882	38938
Bace2	ENSMUSG00000040605,7	-0.0487968	3.34675	-0.517988	0.628606	0.96692	-8.02146	0.112091	3.39842	0.51933	0.62761	0.813134	-7.64685	0.158203	3.39429	0.703983	0.515134	0.680437	-7.62249	338	340	383	393	343	298	287	487	298	3167
Bach1	ENSMUSG00000025612,5	0.153349	4.99167	1.15615	0.304595	0.96692	-7.67147	0.108597	4.9411	0.719421	0.506865	0.723727	-7.68802	-0.0483027	5.0387	-0.466983	0.66158	0.797073	-8.03647	859	1052	1209	1244	1040	1177	908	1162	978	9629
Bach2	ENSMUSG00000040270,16	0.0204482	5.98045	0.091757	0.930785	0.979688	-8.48621	0.0255774	5.95513	0.111582	0.915873	0.957564	-8.07324	0.000769101	5.9868	0.00447627	0.996614	0.997855	-8.28882	1589	2436	2532	2099	2538	1949	2098	1712	2176	19129
Bad	ENSMUSG00000024959,14	-0.207271	4.0674	-0.728884	0.501769	0.96692	-7.97168	-0.0853895	4.0996	-0.290166	0.784351	0.910569	-7.84527	0.118846	4.01575	1.52923	0.191104	0.360399	-6.86724	916	521	488	561	528	515	587	551	451	5118
Bag1	ENSMUSG00000028416,12	-0.102626	7.11643	-0.738013	0.49671	0.96692	-8.29382	-0.0292631	7.12465	-0.183649	0.862131	0.936958	-8.15998	0.0702112	7.09366	0.817805	0.453339	0.64082	-8.04456	5919	4404	4548	4855	4626	4309	4968	4458	3782	41869
Bag2	ENSMUSG00000042215,8	-0.274149	3.95524	-3.07734	0.0311276	0.96692	-5.14298	0.0663336	4.09638	0.84502	0.439958	0.692601	-7.4923	0.337508	3.98065	4.35427	0.0086614	0.201968	-3.43374	525	593	633	465	472	515	565	607	496	4871
Bag3	ENSMUSG00000030847,8	-0.029915	5.85368	-0.291142	0.783719	0.96692	-8.42691	0.00685629	5.84384	0.0800417	0.939579	0.970445	-8.06697	0.0333116	5.8493	0.253253	0.81089	0.904044	-8.23289	2011	1973	2004	2168	1659	2100	2097	1785	1620	17417
Bag4	ENSMUSG00000037316,9	0.0460329	5.20684	0.248701	0.814403	0.96692	-8.37188	0.119751	5.21515	0.687111	0.52521	0.740095	-7.73952	0.0702311	5.25954	1.13334	0.31213	0.499443	-7.50704	944	1395	1450	1271	1216	1380	1238	1277	1168	11339
Bag5	ENSMUSG00000049792,6	0.00489346	5.22844	0.0552425	0.958284	0.996796	-8.40981	0.0106647	5.20297	0.0986362	0.925593	0.962431	-8.00577	0.00237635	5.22586	0.0379184	0.971327	0.983593	-8.19011	1424	1243	1180	1331	1263	1269	1303	1151	1070	11234
Bag6	ENSMUSG00000024392,17	0.060294	7.05897	2.0309	0.103474	0.96692	-6.81156	-0.020698	6.99042	-0.669219	0.535373	0.7486	-7.90957	-0.0846497	7.04111	-3.49282	0.0195174	0.201968	-4.78126	4567	4359	4459	4963	4540	4517	4077	4039	3887	39408
Bahcc1	ENSMUSG00000039741,15	-0.128299	4.71242	-1.09838	0.326639	0.96692	-7.70236	-0.0416743	4.72803	-0.34482	0.745479	0.887709	-7.8933	0.0826442	4.68426	0.903579	0.410608	0.607516	-7.66055	1060	907	853	888	914	782	811	801	872	7888
Bahd1	ENSMUSG00000040007,8	0.044518	5.2837	1.0091	0.363452	0.96692	-7.8576	0.0367278	5.25186	0.642891	0.551055	0.761723	-7.77559	-0.0116169	5.29474	-0.18673	0.859748	0.919162	-8.17899	1276	1356	1299	1412	1389	1272	1274	1173	1223	11674
Baiap2	ENSMUSG00000025372,16	0.00292253	3.30862	0.0210252	0.984114	0.998181	-8.17445	0.03454	3.29623	0.170707	0.871729	0.942118	-7.77366	0.0286212	3.31706	0.130977	0.901273	0.941692	-7.88291	370	327	319	419	298	313	263	426	277	3012
Baiap2l1	ENSMUSG00000038859,7	-0.214289	4.87012	-2.02462	0.10427	0.96692	-6.5907	-0.0884147	4.90469	-0.72219	0.505314	0.722421	-7.68196	0.122429	4.81801	1.80599	0.135171	0.26969	-6.63616	1235	998	1010	960	938	895	1027	899	843	8805
Bak1	ENSMUSG00000057789,14	-0.0694837	4.36226	-0.450389	0.673033	0.96692	-8.19307	0.00262373	4.37045	0.018733	0.985842	0.993577	-7.92667	0.0685913	4.3554	0.624268	0.561807	0.722062	-7.84203	852	657	666	814	657	608	628	743	603	6228
Bambi	ENSMUSG00000024232,2	0.1492	3.64843	1.41121	0.222645	0.96692	-7.21661	0.00228487	3.54656	0.0308585	0.97668	0.989694	-7.82604	-0.150165	3.64174	-1.24482	0.272287	0.451253	-7.14101	384	412	424	492	384	490	352	422	341	3701
Banf1	ENSMUSG00000024844,15	-0.0253642	4.98093	-0.43916	0.680573	0.96692	-8.26951	0.0489993	4.98966	0.702434	0.516452	0.732273	-7.70596	0.0709169	4.99775	1.72329	0.149879	0.293545	-6.76677	1088	1000	1183	1130	1031	1061	1091	1060	927	9571
Banp	ENSMUSG00000025316,16	-0.0500433	4.52919	-0.358319	0.736093	0.96692	-8.2564	-0.0513374	4.49969	-0.316549	0.765486	0.900961	-7.88049	-0.00437331	4.49521	-0.0527487	0.960124	0.976328	-8.08808	962	687	781	799	751	784	791	732	601	6888
Bap1	ENSMUSG00000021901,10	0.00937351	6.40713	0.107426	0.919016	0.972844	-8.52837	0.0031368	6.37573	0.0359699	0.972819	0.987555	-8.11677	-0.00975697	6.40104	-0.257045	0.808133	0.902058	-8.30035	3219	2731	2744	2938	2967	2855	2744	2627	2534	25359
Bard1	ENSMUSG00000026196,7	-0.0149372	1.92038	-0.0505458	0.961826	0.998181	-7.92799	0.00712787	1.90539	0.023417	0.982302	0.992158	-7.55054	0.0174566	1.91871	0.14461	0.891079	0.937304	-7.57551	84	171	151	148	123	117	111	115	131	1151
Basp1	ENSMUSG00000045763,8	-0.17266	9.49565	-1.34984	0.240213	0.96692	-7.9045	-0.206085	9.4504	-1.07062	0.337438	0.582281	-7.73226	-0.0367932	9.38478	-0.22782	0.829467	0.916155	-8.64883	30649	23664	24743	22888	22596	24526	26220	18383	18235	211904
Bax	ENSMUSG00000003873,11	-0.0496697	3.08207	-0.35995	0.734953	0.96692	-8.06197	-0.00284031	3.07791	-0.0186976	0.985868	0.993585	-7.75772	0.0426335	3.07338	0.669086	0.535228	0.698237	-7.58555	355	260	275	295	280	280	261	261	279	2546
Baz1a	ENSMUSG00000035021,13	-0.0397321	3.87337	-0.455115	0.669873	0.96692	-8.12996	0.0756857	3.90234	0.625875	0.561223	0.769676	-7.6441	0.112273	3.9029	1.14735	0.306851	0.493359	-7.29482	559	464	503	525	505	458	555	501	412	4482
Baz1b	ENSMUSG00000002748,7	-0.0749552	6.20795	-0.805535	0.460444	0.96692	-8.14517	-0.0719628	6.18123	-0.712453	0.510782	0.727431	-7.80771	-0.000338153	6.16405	-0.00488987	0.996301	0.997686	-8.31092	2874	2365	2562	2736	2380	2312	2183	2519	2049	21980
Baz2a	ENSMUSG00000040054,16	-0.0198715	5.45375	-0.221252	0.834461	0.96692	-8.4062	-0.0663547	5.4024	-0.79771	0.464331	0.692601	-7.66789	-0.0500485	5.41281	-0.824419	0.449926	0.637279	-7.83035	1660	1424	1449	1606	1524	1357	1397	1311	1225	12953
Baz2b	ENSMUSG00000026987,16	-0.0425937	6.14859	-0.386035	0.716823	0.96692	-8.41939	-0.102396	6.09	-0.705315	0.514817	0.730832	-7.80521	-0.0628553	6.08919	-0.657821	0.541828	0.704462	-8.05029	2843	2297	2278	2450	2419	2323	2409	2114	1772	20905
Bbc3	ENSMUSG00000002083,13	-0.272231	2.26239	-1.05619	0.343609	0.96692	-7.38767	-0.168197	2.28552	-0.608093	0.57198	0.778475	-7.40508	0.100897	2.16841	0.781967	0.472172	0.64434	-7.2983	255	150	152	169	139	141	170	152	118	1446
Bbip1	ENSMUSG00000084957,3	0.0161414	5.64014	0.256287	0.808888	0.96692	-8.4159	-0.0113835	5.5974	-0.167463	0.874139	0.943006	-8.03152	-0.0305905	5.62653	-0.354411	0.73854	0.852996	-8.16787	1714	1640	1727	1640	1757	1766	1680	1585	1338	14847
Bbof1	ENSMUSG00000057265,13	-0.0421325	1.53515	-0.137999	0.896127	0.96692	-7.83913	-0.0667387	1.4941	-0.2258	0.831074	0.933868	-7.43929	-0.0276681	1.49208	-0.107024	0.919235	0.94961	-7.47919	121	115	72	103	74	121	114	78	73	871
Bbs1	ENSMUSG00000006464,9	-0.00161947	3.89758	-0.0197447	0.985082	0.998181	-8.25631	-0.0154629	3.8623	-0.198668	0.851029	0.933868	-7.84372	-0.0174007	3.88246	-0.234275	0.824739	0.913629	-7.96142	490	552	487	491	522	519	484	440	451	4436
Bbs10	ENSMUSG00000035759,4	-0.103049	2.35868	-0.936047	0.396138	0.96692	-7.52622	0.0131475	2.38858	0.119611	0.909854	0.955634	-7.63207	0.112677	2.35794	5.68112	0.00259041	0.201968	-1.7742	154	205	188	176	167	165	172	169	158	1554
Bbs12	ENSMUSG00000051444,9	0.208716	1.97629	1.68886	0.157692	0.96692	-6.59162	0.286692	1.98755	1.99024	0.108386	0.239232	-5.83391	0.0740671	2.11332	0.949093	0.389272	0.587341	-7.13471	102	137	138	147	142	145	127	144	145	1227
Bbs2	ENSMUSG00000031755,6	0.121734	4.41903	2.67881	0.0482454	0.96692	-5.69527	0.0706257	4.36476	0.947166	0.390759	0.647051	-7.42798	-0.0541817	4.44629	-0.900378	0.412144	0.609187	-7.62884	678	740	684	785	765	745	724	706	584	6411
Bbs4	ENSMUSG00000025235,8	0.0199961	5.23298	0.337919	0.750424	0.96692	-8.34343	0.0455398	5.21701	0.614914	0.567838	0.775337	-7.79199	0.0224316	5.24776	0.326979	0.757893	0.867763	-8.12974	1300	1310	1218	1285	1334	1277	1310	1236	1058	11328
Bbs5	ENSMUSG00000063145,10	0.112325	3.21146	0.98041	0.376008	0.96692	-7.62846	0.264891	3.25791	1.70914	0.153413	0.321873	-6.41204	0.150045	3.33555	0.988738	0.371436	0.569337	-7.35873	266	328	321	314	317	361	401	338	269	2915
Bbs7	ENSMUSG00000037325,10	0.0229041	4.6657	0.539225	0.615005	0.96692	-8.17755	-0.0221595	4.61461	-0.341308	0.747953	0.889265	-7.88307	-0.0484456	4.64686	-0.678131	0.52997	0.693626	-7.84535	865	863	851	880	848	904	856	758	703	7528
Bbs9	ENSMUSG00000035919,16	0.190034	4.46231	4.89415	0.00575453	0.913004	-3.23878	0.120934	4.39926	2.69178	0.0472638	0.129487	-5.28876	-0.0724306	4.51512	-2.74429	0.0426992	0.201968	-5.36376	658	719	739	831	786	805	708	743	643	6632
Bbx	ENSMUSG00000022641,15	-0.0453543	4.62325	-0.722583	0.505283	0.96692	-8.04323	-0.00282955	4.61588	-0.041148	0.968909	0.985677	-7.95219	0.0393333	4.61408	0.644686	0.549592	0.711359	-7.8654	787	865	917	862	777	859	781	856	698	7402
BC002059	ENSMUSG00000060149,7	0.111406	3.01786	0.947733	0.390751	0.96692	-7.62997	0.233132	3.05062	2.27015	0.0772314	0.174899	-5.6558	0.118086	3.12625	1.52391	0.192383	0.362429	-6.71349	302	244	255	320	293	255	303	292	259	2523
BC003965	ENSMUSG00000067722,4	-0.0561289	3.92128	-0.699641	0.518224	0.96692	-7.97635	-0.0442204	3.8989	-0.513378	0.631452	0.816549	-7.71624	0.00833445	3.89186	0.201408	0.848895	0.916155	-7.97167	463	552	573	520	512	496	496	461	440	4513
BC004004	ENSMUSG00000052712,17	0.047801	5.77634	0.874609	0.425459	0.96692	-8.03907	0.0971703	5.77265	1.79183	0.138437	0.294088	-6.58422	0.0458867	5.81741	2.26357	0.0750909	0.201968	-6.1626	1680	1920	1934	1959	1868	1907	1854	1841	1684	16647
BC005537	ENSMUSG00000019132,11	0.0276344	7.33955	0.122805	0.90749	0.96692	-8.62062	-0.0051417	7.29493	-0.022375	0.98309	0.992533	-8.19398	-0.0367913	7.33014	-0.423468	0.690831	0.817861	-8.34506	3901	6396	6585	5560	5370	5916	5241	4643	5043	48655
BC005561	ENSMUSG00000079065,3	0.078025	3.70159	1.13834	0.311245	0.96692	-7.53579	0.0488032	3.65718	0.332754	0.753991	0.893302	-7.77492	-0.0315138	3.71694	-0.236823	0.822875	0.912413	-7.93251	465	415	418	454	464	456	451	467	317	3907
BC005624	ENSMUSG00000026851,9	-0.188779	5.37869	-0.864743	0.430325	0.96692	-8.00579	-0.1584	5.36527	-0.616758	0.566722	0.774632	-7.80445	0.0271452	5.29119	0.194631	0.853901	0.916155	-8.17675	2056	1290	1317	1350	1358	1300	1539	1149	1066	12425
BC017158	ENSMUSG00000030780,15	-0.0267006	4.00592	-0.525319	0.62389	0.96692	-8.10716	-0.122516	3.92996	-1.4119	0.222113	0.436614	-6.86924	-0.0994586	3.9372	-1.39765	0.225264	0.402938	-7.01372	586	527	549	566	546	525	422	504	465	4690
BC024063	ENSMUSG00000112160,1	-0.183125	1.11079	-0.653396	0.545008	0.96692	-7.51159	-0.212236	1.06602	-0.838116	0.443452	0.692601	-6.98591	-0.031523	0.996322	-0.169221	0.872739	0.927601	-7.348	56	101	84	68	57	85	63	71	51	636
BC024978	ENSMUSG00000078786,9	0.0251432	3.08578	0.267674	0.800634	0.96692	-8.09715	0.021026	3.05555	0.312853	0.768118	0.902457	-7.69561	-0.00767219	3.08891	-0.107441	0.918921	0.949392	-7.84078	265	313	285	301	266	315	262	274	259	2540
BC025920	ENSMUSG00000074862,11	-0.141057	1.49661	-1.16692	0.300637	0.96692	-7.11719	-0.182321	1.44655	-1.53342	0.190947	0.390162	-6.30843	-0.0440207	1.3966	-0.300091	0.777063	0.881914	-7.40888	91	104	108	99	101	77	85	93	66	824
BC028528	ENSMUSG00000038543,13	0.0491374	2.66173	0.339153	0.749553	0.96692	-8.0003	-0.0472442	2.58534	-0.231964	0.82656	0.933868	-7.64313	-0.0995893	2.62966	-0.465933	0.662279	0.797655	-7.62111	233	188	218	257	228	182	152	248	172	1878
BC029722	ENSMUSG00000074649,6	-0.261689	3.33722	-2.76768	0.043658	0.96692	-5.44164	-0.111324	3.38294	-0.801531	0.462325	0.692601	-7.43769	0.147828	3.27252	1.27815	0.261309	0.437244	-7.03558	418	368	350	323	329	297	358	347	257	3047
BC031181	ENSMUSG00000036299,5	0.00934296	6.23373	0.0618195	0.953324	0.993828	-8.51525	0.0970363	6.24884	0.634644	0.555968	0.765516	-7.87173	0.0842685	6.27488	0.904875	0.409988	0.606857	-7.86683	2061	2860	2849	2457	2662	2657	2795	2413	2295	23049
BC034090	ENSMUSG00000033722,9	-0.113268	2.30285	-0.740184	0.495513	0.96692	-7.68864	-0.108616	2.27709	-0.594688	0.580176	0.784613	-7.41301	0.0015155	2.23955	0.0103866	0.992144	0.995235	-7.66251	205	172	152	187	158	144	130	182	135	1465
BC037032	ENSMUSG00000087221,3	-0.0811558	1.54238	-0.682828	0.527854	0.96692	-7.58194	0.0866297	1.59859	0.732696	0.49946	0.716917	-7.18309	0.163695	1.5796	1.43516	0.214965	0.391996	-6.47548	89	103	115	96	107	88	91	100	105	894
BC048403	ENSMUSG00000053684,8	-0.0793202	3.29066	-0.755591	0.487073	0.96692	-7.84423	-0.0355455	3.28423	-0.283525	0.789127	0.913448	-7.7409	0.040008	3.266	0.375685	0.723683	0.841741	-7.79897	297	371	366	313	332	334	340	277	300	2930
BC052040	ENSMUSG00000040282,13	0.0878417	2.53516	0.919563	0.40384	0.96692	-7.57436	0.205744	2.56668	2.2187	0.0821389	0.184993	-5.6424	0.113883	2.63124	1.49501	0.199468	0.373483	-6.64485	169	207	201	221	185	209	192	206	206	1796
BC055324	ENSMUSG00000041406,14	0.268646	2.02315	1.18628	0.293634	0.96692	-7.20225	0.154923	1.94024	0.690213	0.523429	0.738467	-7.28242	-0.118488	2.09512	-0.617089	0.566143	0.725953	-7.40678	99	124	163	186	155	123	107	140	140	1237
BC067074	ENSMUSG00000021763,17	0.0653425	3.14288	0.458247	0.667783	0.96692	-8.02419	0.124467	3.14381	1.32609	0.24703	0.467314	-6.86371	0.0560856	3.19656	0.39285	0.711798	0.832874	-7.77752	303	308	274	334	350	253	293	331	256	2702
Bc1	ENSMUSG00000115783,1	-0.506506	4.02261	-1.36586	0.235503	0.96692	-7.31802	0.124018	4.306	0.453746	0.670675	0.842054	-7.79733	0.629473	4.07516	1.64637	0.165024	0.318623	-6.72796	823	528	663	350	394	742	737	823	459	5519
BC106179	ENSMUSG00000045231,5	-0.0725501	1.27048	-0.381418	0.720016	0.96692	-7.70745	0.144629	1.35171	0.686846	0.525362	0.740197	-7.16953	0.213382	1.33652	2.02243	0.103363	0.215131	-5.67432	63	100	94	86	80	75	74	93	88	753
Bcam	ENSMUSG00000002980,14	0.0682922	6.48436	1.12593	0.315955	0.96692	-7.86163	0.0180054	6.4312	0.249916	0.81346	0.926029	-8.0846	-0.0539836	6.48578	-0.840002	0.441964	0.631883	-7.95161	3166	2885	2918	3382	2933	3131	2981	2653	2633	26682
Bcan	ENSMUSG00000004892,13	0.151869	4.20676	0.952625	0.388514	0.96692	-7.79086	0.143598	4.17475	1.11259	0.320795	0.56131	-7.23857	-0.0119264	4.27052	-0.120058	0.909453	0.944213	-8.04745	712	543	554	771	571	673	626	622	557	5629
Bcap29	ENSMUSG00000020650,15	0.0736131	4.98599	0.314314	0.767152	0.96692	-8.3256	0.143187	4.99157	0.628686	0.559535	0.768304	-7.76063	0.0664491	5.05023	0.506405	0.635668	0.778583	-8.01605	759	1245	1239	1003	1153	1200	1219	1040	937	9795
Bcap31	ENSMUSG00000002015,5	0.0730261	6.17372	1.38278	0.230625	0.96692	-7.53831	0.046303	6.13211	0.963747	0.383211	0.639206	-7.58181	-0.0300783	6.18912	-0.596512	0.578693	0.736364	-8.10582	2289	2509	2420	2763	2359	2510	2287	2438	2064	21639
Bcar1	ENSMUSG00000031955,10	-0.0129792	5.19535	-0.151571	0.886002	0.96692	-8.39411	-0.0157774	5.16548	-0.156451	0.882331	0.94723	-7.9932	-0.00608266	5.17946	-0.107142	0.919146	0.949571	-8.17785	1402	1166	1215	1316	1195	1243	1233	1164	1006	10940
Bcar3	ENSMUSG00000028121,8	-0.128608	4.22368	-4.25514	0.0095648	0.96692	-3.82568	-0.0435382	4.23796	-1.16118	0.301845	0.53612	-7.19364	0.0814145	4.19445	1.85893	0.126547	0.254442	-6.47704	666	647	688	628	588	622	621	581	565	5606
Bcas1	ENSMUSG00000013523,13	0.0635275	2.97745	0.152434	0.885359	0.96692	-8.10872	-0.226621	2.80645	-0.667745	0.536425	0.749235	-7.45384	-0.2953	2.85641	-1.0537	0.343692	0.536775	-7.19314	368	165	300	419	208	239	191	227	197	2314
Bcas2	ENSMUSG00000005687,14	0.0802225	5.83242	2.1018	0.0949375	0.96692	-6.59387	0.000494658	5.76447	0.0125978	0.990478	0.995447	-8.06364	-0.0833546	5.82513	-3.4571	0.0198002	0.201968	-4.66237	1939	1902	1839	2101	2001	1928	1726	1756	1686	16878
Bcas3	ENSMUSG00000059439,15	0.0669743	5.18723	1.43598	0.215913	0.96692	-7.37063	-0.0211578	5.11513	-0.345623	0.744914	0.88736	-7.93147	-0.0919226	5.16924	-1.99325	0.107147	0.221983	-6.44054	1278	1156	1216	1328	1234	1275	1134	1059	1078	10758
Bcat1	ENSMUSG00000030268,17	0.0341469	5.52871	0.807889	0.459216	0.96692	-8.07215	-0.0672713	5.45024	-0.829175	0.448009	0.692601	-7.64515	-0.105526	5.48811	-1.35434	0.237747	0.414706	-7.28657	1467	1547	1666	1676	1526	1607	1374	1272	1419	13554
Bcat2	ENSMUSG00000030826,19	-0.0166793	4.43248	-0.211646	0.841516	0.96692	-8.2952	0.0989471	4.46165	1.13651	0.311639	0.549122	-7.24488	0.112441	4.47395	2.05535	0.0992638	0.207674	-6.26352	812	710	707	740	755	713	706	800	666	6609
Bccip	ENSMUSG00000030983,4	-0.105053	4.68553	-0.694511	0.521149	0.96692	-8.0721	-0.0844235	4.66741	-0.531736	0.619646	0.807412	-7.79149	0.017272	4.63524	0.282755	0.789522	0.890092	-8.06191	1118	807	839	880	869	804	858	785	708	7668
Bcdin3d	ENSMUSG00000037525,5	-0.00527772	2.37303	-0.0444632	0.966416	0.998181	-8.01589	-0.0285791	2.33391	-0.439246	0.680407	0.846988	-7.51591	-0.0270443	2.35085	-0.223165	0.832881	0.916155	-7.65783	182	179	170	204	184	147	150	173	151	1540
Bche	ENSMUSG00000027792,11	0.113464	5.66537	0.553871	0.605727	0.96692	-8.27734	0.0797281	5.61976	0.432984	0.684632	0.848885	-7.93886	-0.0372475	5.69807	-0.320646	0.76239	0.871456	-8.19052	1263	1861	1965	1713	1681	2063	1746	1563	1506	15361
Bckdha	ENSMUSG00000060376,7	0.0223825	3.98706	0.214082	0.839725	0.96692	-8.24028	0.119824	4.00757	1.06636	0.339169	0.584563	-7.26784	0.0939368	4.03906	1.57933	0.179482	0.341977	-6.80878	613	490	516	586	549	510	505	586	505	4860
Bckdhb	ENSMUSG00000032263,14	0.103104	3.54731	1.50381	0.198473	0.96692	-7.0906	0.214525	3.57447	3.30832	0.0242246	0.129487	-4.43412	0.108012	3.64716	3.46721	0.0194182	0.201968	-4.33537	354	375	429	421	425	400	414	426	380	3624
Bckdk	ENSMUSG00000030802,14	0.117737	4.45785	1.83061	0.132302	0.96692	-6.79478	0.0947258	4.41828	0.835404	0.444831	0.692601	-7.5371	-0.026384	4.49742	-0.219013	0.83593	0.916155	-8.06106	701	746	715	883	722	757	618	833	665	6640
Bcl10	ENSMUSG00000028191,11	0.0698541	3.91874	0.442899	0.678058	0.96692	-8.14222	0.129694	3.91987	0.869892	0.427548	0.681591	-7.44892	0.0565858	3.9764	0.726008	0.502727	0.669241	-7.70717	404	530	596	515	509	572	484	548	475	4633
Bcl11a	ENSMUSG00000000861,15	-0.0537262	4.49232	-0.57609	0.591817	0.96692	-8.13408	0.0372083	4.5093	0.373165	0.725652	0.873727	-7.85856	0.0874305	4.50353	1.11342	0.319776	0.508861	-7.42415	694	858	805	739	750	784	804	700	693	6827
Bcl11b	ENSMUSG00000048251,15	-0.0312068	4.31146	-0.210494	0.842363	0.96692	-8.28103	-0.064949	4.26667	-0.325381	0.759212	0.896769	-7.8515	-0.0378629	4.27225	-0.262386	0.804253	0.899138	-8.01488	547	777	756	678	649	694	703	505	597	5906
Bcl2	ENSMUSG00000057329,7	0.00444854	5.98923	0.0316307	0.976104	0.998181	-8.49164	0.0356708	5.976	0.356305	0.737417	0.882274	-8.00647	0.0278597	5.99965	0.258814	0.806847	0.901094	-8.25009	1863	2230	2443	2056	2037	2483	2142	2053	1872	19179
Bcl2l1	ENSMUSG00000007659,18	0.0861663	5.41052	1.78686	0.139653	0.96692	-6.9567	0.0300958	5.35401	1.37927	0.2289	0.443346	-7.05895	-0.0594738	5.41794	-1.36112	0.235752	0.411939	-7.26957	1404	1429	1396	1493	1455	1562	1338	1350	1242	12669
Bcl2l11	ENSMUSG00000027381,16	0.032812	3.41261	0.226861	0.830349	0.96692	-8.15877	-0.113956	3.31166	-0.698906	0.51846	0.734256	-7.51071	-0.151059	3.3496	-1.34682	0.239979	0.417983	-6.96937	294	371	424	368	346	395	282	295	332	3107
Bcl2l13	ENSMUSG00000009112,4	0.0611145	5.86974	0.858725	0.433314	0.96692	-8.06322	0.0237276	5.82261	0.330075	0.755887	0.894445	-8.00346	-0.0409304	5.87419	-1.9243	0.114907	0.235206	-6.61818	1773	1921	2193	2087	2019	2040	1871	1859	1699	17462
Bcl2l2	ENSMUSG00000089682,10	-0.0166721	5.06826	-0.304631	0.774058	0.96692	-8.33827	-0.0161433	5.03985	-0.40324	0.704878	0.860934	-7.8987	-0.00269802	5.05249	-0.0451228	0.965883	0.980115	-8.16657	1117	1179	1161	1115	1125	1193	1018	1125	971	10004
Bcl6	ENSMUSG00000022508,5	0.110877	2.65237	0.611319	0.570175	0.96692	-7.84894	-0.0914393	2.52274	-0.776175	0.475758	0.695617	-7.32045	-0.205695	2.59893	-1.25657	0.268368	0.446238	-6.91789	180	202	241	253	176	251	188	188	154	1833
Bcl6b	ENSMUSG00000000317,11	0.202462	1.68914	0.866875	0.429269	0.96692	-7.45856	-0.424223	1.35374	-0.928304	0.399493	0.654813	-6.95957	-0.633509	1.47611	-1.48403	0.202226	0.377563	-6.3824	77	109	127	134	94	131	43	64	123	902
Bcl7a	ENSMUSG00000029438,9	0.0132085	5.4116	0.259576	0.806501	0.96692	-8.39061	-0.131645	5.31107	-2.40889	0.0655233	0.150972	-5.74171	-0.14858	5.33841	-2.33506	0.0707236	0.201968	-6.01607	1420	1497	1425	1494	1386	1522	1259	1158	1190	12351
Bcl7b	ENSMUSG00000029681,12	-0.179124	3.89414	-1.47691	0.205217	0.96692	-7.17	-0.0197962	3.94491	-0.183032	0.862588	0.937222	-7.8575	0.156226	3.87606	1.9816	0.108698	0.2247	-6.26706	616	504	507	473	447	519	511	510	435	4522
Bcl7c	ENSMUSG00000030814,17	0.100623	4.89368	2.33823	0.0715445	0.96692	-6.18614	0.0387675	4.83446	1.07791	0.334023	0.577873	-7.34614	-0.0654082	4.90553	-1.92018	0.117279	0.238687	-6.50018	1005	977	959	1055	1066	1045	923	931	894	8855
Bcl9	ENSMUSG00000038256,15	0.0199801	4.81347	0.241066	0.819967	0.96692	-8.33081	-0.127545	4.71202	-1.54584	0.188014	0.385006	-6.79318	-0.151404	4.74216	-2.25366	0.0779811	0.201968	-6.0419	1017	963	886	1075	902	942	834	766	784	8169
Bcl9l	ENSMUSG00000063382,6	-0.00332218	5.33842	-0.0215107	0.983748	0.998181	-8.42329	-0.111341	5.25651	-0.76105	0.483908	0.702682	-7.68482	-0.11168	5.27494	-1.86735	0.125228	0.252219	-6.61813	1681	1197	1317	1562	1276	1333	1158	1224	1115	11863
Bclaf1	ENSMUSG00000037608,16	0.00430659	7.41367	0.0750811	0.943332	0.987666	-8.63374	-0.0234174	7.37113	-0.343209	0.746613	0.888449	-8.12965	-0.0309582	7.39418	-0.381273	0.719804	0.838406	-8.3725	5733	5967	5747	5732	5710	6139	5794	5215	4660	50697
Bclaf3	ENSMUSG00000044150,12	0.041194	4.3276	0.264684	0.802798	0.96692	-8.26747	0.100974	4.32815	0.815527	0.455034	0.692601	-7.54454	0.0568735	4.37034	0.381299	0.719786	0.838403	-7.98451	581	726	730	639	652	818	751	665	572	6134
Bcor	ENSMUSG00000040363,15	0.0403	5.7093	0.777495	0.475257	0.96692	-8.11702	-0.0241409	5.64942	-0.436059	0.682555	0.848079	-7.93991	-0.0683903	5.69	-0.948841	0.389388	0.587491	-7.75154	1697	1791	1801	2017	1779	1677	1507	1607	1620	15496
Bcorl1	ENSMUSG00000036959,15	-0.170675	4.67381	-1.32001	0.249224	0.96692	-7.45098	-0.215099	4.62424	-2.60393	0.0522425	0.129487	-5.42357	-0.0484476	4.55867	-0.454736	0.669745	0.802745	-7.97607	1024	866	893	998	761	737	741	727	707	7454
Bcr	ENSMUSG00000009681,10	0.03993	6.59522	1.05511	0.344054	0.96692	-7.94759	-0.0852152	6.50468	-1.00216	0.366187	0.620131	-7.57594	-0.129063	6.54532	-1.5652	0.182686	0.347119	-7.16288	3368	3185	3221	3440	3390	3258	3007	2566	2826	28261
Bcs1l	ENSMUSG00000026172,12	0.00267245	3.26681	0.0289503	0.978128	0.998181	-8.16789	0.0181132	3.24467	0.180403	0.864537	0.938604	-7.76386	0.0131182	3.26747	0.11227	0.915296	0.946951	-7.87589	303	343	339	309	327	356	307	349	256	2889
Bdh1	ENSMUSG00000046598,15	0.0278456	6.94384	0.254465	0.810212	0.96692	-8.55084	-0.0468575	6.87846	-0.402584	0.705333	0.861175	-8.06317	-0.0783105	6.9127	-1.22231	0.279939	0.459892	-7.61555	4751	4012	3793	4508	4332	3964	3969	3534	3517	36380
Bdkrb2	ENSMUSG00000021070,6	-0.122901	4.03119	-0.919216	0.404003	0.96692	-7.80121	0.0323827	4.08009	0.19947	0.850437	0.933868	-7.86987	0.152332	4.03869	1.12153	0.316646	0.504908	-7.34476	662	502	595	620	515	484	566	639	438	5021
Bdnf	ENSMUSG00000048482,14	-0.0366145	4.93187	-0.138911	0.895445	0.96692	-8.36747	-0.204863	4.81922	-1.07493	0.335695	0.580017	-7.34681	-0.17189	4.82205	-0.584834	0.585893	0.741971	-7.9354	920	1035	1234	1078	741	1382	1071	733	736	8930
Bdp1	ENSMUSG00000049658,13	0.00627664	5.63227	0.120659	0.909097	0.96692	-8.44596	0.00273851	5.60173	0.033565	0.974636	0.988603	-8.04825	-0.00673067	5.62581	-0.0750258	0.943315	0.965249	-8.23966	1651	1739	1681	1660	1720	1735	1752	1528	1363	14829
Bean1	ENSMUSG00000031872,14	-0.0364617	6.10792	-0.404429	0.704166	0.96692	-8.40661	-0.0849278	6.05527	-0.740685	0.495042	0.712913	-7.77424	-0.0519123	6.05767	-0.467103	0.6615	0.797029	-8.16813	2583	2325	2261	2343	2506	2169	2377	1924	1871	20359
Becn1	ENSMUSG00000035086,13	0.00259015	6.09572	0.0985394	0.925649	0.976617	-8.49738	0.019603	6.07591	0.333303	0.753603	0.893013	-8.02469	0.0135059	6.09793	0.243973	0.817653	0.908634	-8.26681	2241	2400	2363	2424	2332	2288	2363	2111	1997	20519
Begain	ENSMUSG00000040867,12	-0.0506981	4.37184	-0.460254	0.666446	0.96692	-8.189	-0.0172189	4.36077	-0.138853	0.895457	0.952748	-7.91408	0.0294865	4.3559	0.380184	0.720559	0.839096	-7.98281	827	668	674	712	721	660	661	611	670	6204
Bend3	ENSMUSG00000038214,15	-0.0186786	3.06794	-0.19908	0.850771	0.96692	-8.1136	-0.029406	3.03549	-0.211232	0.841771	0.933868	-7.72419	-0.0152555	3.04732	-0.121799	0.908147	0.943305	-7.83028	252	302	313	289	268	300	243	240	291	2498
Bend4	ENSMUSG00000092060,4	-0.0531984	4.8092	-0.324718	0.75976	0.96692	-8.30201	-0.108907	4.75371	-0.547747	0.609458	0.802544	-7.79042	-0.0598073	4.74813	-0.527208	0.62223	0.767801	-7.96196	756	1115	1099	988	940	905	716	864	902	8285
Bend5	ENSMUSG00000028545,13	-0.0578362	4.85162	-0.383894	0.718303	0.96692	-8.28191	-0.0971098	4.80338	-0.594159	0.580501	0.784845	-7.76543	-0.0424927	4.79479	-0.41539	0.696333	0.821483	-8.02954	1215	925	906	1001	1031	884	980	855	745	8542
Bend6	ENSMUSG00000042182,16	-0.0678327	5.97579	-0.904565	0.410952	0.96692	-8.03223	-0.0132438	5.97424	-0.141073	0.893799	0.952356	-8.0704	0.0513034	5.96149	0.436809	0.681794	0.811142	-8.17216	2117	2240	2245	1973	2207	2153	2307	1894	1783	18919
Best1	ENSMUSG00000037418,6	0.0138724	1.69234	0.160612	0.87927	0.96692	-7.86777	-0.128777	1.59355	-1.04545	0.347775	0.596303	-6.89452	-0.147161	1.62213	-1.26735	0.264819	0.441792	-6.68125	109	99	121	107	115	111	91	83	100	936
Bet1	ENSMUSG00000032757,6	0.0716211	4.03595	0.347979	0.743342	0.96692	-8.2013	0.1964	4.06969	0.952963	0.388106	0.644196	-7.38899	0.121423	4.12713	2.93171	0.035581	0.201968	-5.08287	404	574	701	577	569	584	562	616	533	5120
Bet1l	ENSMUSG00000025484,9	0.0162427	3.50945	0.174705	0.868802	0.96692	-8.18553	0.0475822	3.49671	0.470987	0.659201	0.835255	-7.68817	0.0280662	3.52502	0.41989	0.693265	0.819376	-7.82733	431	362	370	426	363	390	355	407	331	3435
Bex1	ENSMUSG00000050071,8	-0.194516	5.33956	-1.48372	0.203488	0.96692	-7.32908	-0.052815	5.38165	-0.383368	0.718574	0.868871	-7.94048	0.138401	5.30529	1.42919	0.216574	0.391996	-7.17383	1704	1282	1481	1259	1254	1385	1469	1272	1166	12272
Bex2	ENSMUSG00000042750,7	-0.196393	7.04859	-1.21314	0.284168	0.96692	-7.82319	-0.0936549	7.07143	-0.447437	0.674901	0.844326	-8.05676	0.0994055	6.99376	0.710286	0.511562	0.677024	-8.12125	6029	4271	4406	4243	4187	4293	5120	3767	3637	39953
Bex3	ENSMUSG00000046432,12	-0.0640458	7.7338	-0.252531	0.811617	0.96692	-8.63033	-0.13142	7.67203	-0.504182	0.637415	0.820513	-8.07367	-0.0706841	7.65996	-0.91854	0.403493	0.599957	-8.01949	10612	6238	6217	7730	7125	6599	6912	6056	5617	63106
Bex4	ENSMUSG00000047844,3	-0.114393	3.86337	-1.0472	0.347326	0.96692	-7.65335	-0.0991052	3.84263	-0.628193	0.559831	0.768526	-7.63465	0.0116364	3.80598	0.0906427	0.931552	0.957415	-7.97684	591	471	496	487	500	452	529	397	402	4325
Bfar	ENSMUSG00000022684,15	0.0549381	5.69953	1.42056	0.220079	0.96692	-7.44382	0.121232	5.70434	2.56149	0.0548559	0.129487	-5.5817	0.0628964	5.75245	1.9204	0.117246	0.238655	-6.61119	1638	1810	1781	1926	1773	1754	1812	1792	1574	15860
Bgn	ENSMUSG00000031375,17	0.0560975	7.30278	0.355974	0.737734	0.96692	-8.54992	0.192286	7.3425	0.588051	0.584262	0.78751	-7.99527	0.133513	7.39059	0.40591	0.702817	0.826076	-8.36082	5831	4570	5561	6695	5448	4608	3980	8794	4738	50225
Bhlhb9	ENSMUSG00000072964,14	-0.0108286	6.48947	-0.0942551	0.928907	0.978491	-8.53843	0.00405249	6.4684	0.0373191	0.9718	0.987066	-8.12468	0.0112582	6.48423	0.132726	0.899963	0.941372	-8.33974	2638	3305	3349	2948	3005	3269	3037	2698	2708	26957
Bhlhe40	ENSMUSG00000030103,11	0.203381	3.23623	0.920864	0.403227	0.96692	-7.68948	0.630036	3.41789	1.26167	0.26745	0.487769	-6.97577	0.426521	3.54011	0.921402	0.402143	0.598357	-7.46101	388	238	291	346	396	303	328	835	270	3395
Bhlhe41	ENSMUSG00000030256,11	-0.0376437	3.37059	-0.24454	0.817433	0.96692	-8.14759	0.360395	3.54077	2.45579	0.0620187	0.143296	-5.48681	0.395218	3.54259	2.95192	0.0347962	0.201968	-4.95943	300	405	376	377	383	296	442	472	348	3399
Bicc1	ENSMUSG00000014329,14	-0.0497889	5.02094	-0.234935	0.824443	0.96692	-8.3556	0.103911	5.06934	0.285647	0.787599	0.912503	-7.94964	0.151361	5.06377	0.408214	0.701238	0.824985	-8.07005	1358	996	1064	1435	1011	900	817	1864	877	10322
Bicd1	ENSMUSG00000003452,15	-0.0145925	6.24766	-0.0989808	0.925357	0.976448	-8.51304	-0.0711495	6.19045	-0.462278	0.664984	0.838406	-7.97435	-0.0599671	6.20468	-0.389942	0.713804	0.834315	-8.22504	2202	2829	2844	2338	2615	2855	2696	2069	2063	22511
Bicd2	ENSMUSG00000037933,16	0.0515886	7.07371	0.87867	0.423468	0.96692	-8.16842	-0.0808529	6.9795	-0.965856	0.382259	0.638686	-7.65169	-0.136255	7.02585	-2.07901	0.0964243	0.202328	-6.5602	4844	4309	4425	4909	4709	4499	4164	3666	3851	39376
Bicdl1	ENSMUSG00000041609,16	-0.145148	5.19712	-0.774921	0.476634	0.96692	-8.06447	-0.152404	5.16545	-0.687147	0.525189	0.740095	-7.73441	-0.0109461	5.113	-0.0871973	0.934146	0.959068	-8.17133	1704	1166	1152	1267	1202	1122	1293	964	1005	10875
Bicra	ENSMUSG00000070808,4	-0.0355881	4.15807	-0.26247	0.804403	0.96692	-8.24766	-0.150998	4.07266	-1.41816	0.220394	0.436614	-6.87863	-0.119161	4.07458	-1.32384	0.246928	0.426843	-7.12285	708	580	573	715	552	558	520	527	471	5204
Bicral	ENSMUSG00000036568,7	0.0756676	4.8535	0.883907	0.420913	0.96692	-7.93107	-0.000918596	4.78764	-0.00942725	0.992875	0.996358	-7.9708	-0.0805469	4.84581	-1.20021	0.28764	0.469558	-7.37774	915	1072	907	1105	991	961	859	857	909	8576
Bid	ENSMUSG00000004446,12	-0.0424215	3.92803	-0.385704	0.717051	0.96692	-8.17131	0.0118515	3.92729	0.114595	0.913613	0.956607	-7.86773	0.0504578	3.92627	1.13325	0.312164	0.499463	-7.31386	603	476	511	562	508	475	487	495	469	4586
Bin1	ENSMUSG00000024381,16	-0.0744984	6.34893	-1.46615	0.207977	0.96692	-7.45622	0.00804558	6.36183	0.122105	0.907985	0.955006	-8.10731	0.0792813	6.34507	1.85124	0.127762	0.256588	-6.77474	3025	2757	2797	2891	2635	2652	2605	2872	2383	24617
Bin3	ENSMUSG00000022089,9	0.0985443	4.12585	1.12734	0.315415	0.96692	-7.60226	-0.0109292	4.04308	-0.164657	0.876225	0.944274	-7.87309	-0.113158	4.11284	-1.45458	0.209811	0.389276	-6.9733	615	546	569	658	552	653	500	549	512	5154
Birc2	ENSMUSG00000057367,12	0.0933576	4.92238	0.890073	0.41792	0.96692	-7.93304	0.0633887	4.87876	0.758413	0.485339	0.704053	-7.65046	-0.0332252	4.94648	-0.454602	0.669835	0.802767	-8.03059	880	1073	1066	1078	989	1162	977	1012	874	9111
Birc3	ENSMUSG00000032000,17	-0.230212	1.54316	-0.963488	0.383584	0.96692	-7.33742	-0.0817686	1.59105	-0.309243	0.770692	0.904095	-7.43182	0.144809	1.49471	0.40853	0.701022	0.824936	-7.38791	100	107	116	124	64	97	65	130	93	896
Birc5	ENSMUSG00000017716,15	0.0252926	3.39766	0.145804	0.890301	0.96692	-8.17483	0.00311531	3.3597	0.0153607	0.98839	0.994794	-7.80032	-0.0264215	3.39213	-0.112962	0.914776	0.946679	-7.89965	322	341	413	470	334	307	254	408	332	3181
Birc6	ENSMUSG00000024073,16	-0.0766846	7.30563	-0.540498	0.614195	0.96692	-8.45381	0.079061	7.35433	0.932467	0.397552	0.653861	-7.71459	0.152824	7.33719	0.958389	0.385028	0.582783	-7.94386	5677	5449	5519	4753	6340	4899	5990	5515	4577	48719
Bivm	ENSMUSG00000041684,11	0.0424247	5.8439	0.270609	0.798511	0.96692	-8.43279	0.0187807	5.8032	0.150953	0.886427	0.948984	-8.05341	-0.0269692	5.84594	-0.280013	0.791499	0.891471	-8.22384	1587	2150	2113	1816	2037	2162	1829	1827	1690	17211
Blcap	ENSMUSG00000067787,10	0.0415315	5.17459	0.98929	0.372083	0.96692	-7.86556	0.0430903	5.1468	0.678367	0.530253	0.743915	-7.73955	-0.00162937	5.18827	-0.0331326	0.974944	0.986136	-8.18533	1138	1268	1245	1315	1251	1205	1191	1229	1009	10851
Blm	ENSMUSG00000030528,12	0.140936	3.57414	0.970426	0.380463	0.96692	-7.69141	-0.0152117	3.46794	-0.103179	0.922181	0.960575	-7.80931	-0.159631	3.55922	-3.46316	0.0202305	0.201968	-4.34479	309	435	431	468	412	408	342	378	327	3510
Blmh	ENSMUSG00000020840,10	0.0518474	6.79652	1.38215	0.230805	0.96692	-7.60276	0.0105595	6.74759	0.333378	0.753465	0.892916	-8.08243	-0.0448198	6.79429	-2.03573	0.100812	0.210532	-6.58705	3543	3869	3783	3956	3918	3773	3479	3497	3280	33098
Bloc1s1	ENSMUSG00000090247,7	-0.264259	3.71457	-0.668913	0.535917	0.96692	-7.97171	-0.184033	3.72522	-0.449	0.673853	0.84403	-7.72955	0.0776851	3.61282	0.620196	0.564263	0.72423	-7.72402	854	390	356	405	430	396	459	413	318	4021
Bloc1s2	ENSMUSG00000057506,5	-0.0411072	3.71148	-0.352164	0.740404	0.96692	-8.15745	0.0167475	3.71284	0.178995	0.86558	0.939186	-7.82933	0.0537142	3.7124	0.491532	0.645376	0.785757	-7.82288	498	425	441	489	468	378	447	396	411	3953
Bloc1s3	ENSMUSG00000057667,7	0.102363	2.77645	1.38835	0.229042	0.96692	-7.11013	0.0664547	2.73102	1.4185	0.219682	0.436614	-6.68777	-0.0398339	2.80236	-0.527632	0.621958	0.767636	-7.62372	213	232	232	276	220	236	207	227	211	2054
Bloc1s4	ENSMUSG00000060708,4	-0.0187747	1.76153	-0.119428	0.910019	0.967372	-7.88882	0.133365	1.81038	0.95468	0.387323	0.643263	-7.028	0.147616	1.82218	1.00791	0.363058	0.559991	-7.00897	102	111	138	124	96	128	125	105	119	1048
Bloc1s5	ENSMUSG00000038982,10	-0.007208	4.16858	-0.0611072	0.953861	0.994227	-8.28835	0.01334	4.14999	0.109493	0.917441	0.958155	-7.89479	0.0175007	4.16697	0.219742	0.835395	0.916155	-8.01116	707	555	594	622	654	571	601	608	492	5404
Bloc1s6	ENSMUSG00000005804,14	0.06903	5.20575	1.39552	0.227015	0.96692	-7.42111	0.0471333	5.16593	0.816395	0.454585	0.692601	-7.62961	-0.024929	5.22138	-0.39015	0.713661	0.834298	-8.09942	1189	1270	1233	1270	1324	1295	1206	1252	1022	11061
Blvra	ENSMUSG00000001999,15	-0.0140462	3.47996	-0.262195	0.804601	0.96692	-8.15824	-0.00112915	3.45876	-0.0122246	0.99076	0.995582	-7.81442	0.00898097	3.47214	0.114538	0.913594	0.945877	-7.91457	406	363	380	406	370	366	316	370	360	3337
Blvrb	ENSMUSG00000040466,16	-0.151544	3.07754	-0.566565	0.597756	0.96692	-7.9498	0.0939314	3.172	0.322557	0.761216	0.898029	-7.71009	0.242221	3.11554	1.40114	0.224289	0.402817	-6.86015	427	231	284	321	268	239	257	377	263	2667
Blzf1	ENSMUSG00000026577,13	0.0393251	5.02903	0.670172	0.535184	0.96692	-8.12889	0.061333	5.01149	1.02229	0.357528	0.609072	-7.4205	0.0185852	5.05212	0.271415	0.797711	0.895342	-8.12343	1032	1134	1136	1129	1089	1189	1139	1033	966	9847
Bmerb1	ENSMUSG00000044117,12	0.0632992	6.6119	1.32439	0.247879	0.96692	-7.65195	0.00404453	6.55395	0.06271	0.952638	0.97715	-8.13043	-0.0627038	6.60622	-1.20367	0.286422	0.467957	-7.59942	3378	3294	3138	3507	3461	3320	3244	2940	2777	29059
Bmf	ENSMUSG00000040093,15	-0.089202	2.95252	-0.503071	0.638263	0.96692	-7.9687	-0.0604702	2.9403	-0.340926	0.748222	0.889416	-7.66594	0.0240477	2.91625	0.182602	0.862806	0.921562	-7.79198	224	265	340	307	233	237	213	249	254	2322
Bmi1	ENSMUSG00000026739,13	0.162409	5.08543	0.955726	0.387101	0.96692	-7.88868	0.156975	5.05421	0.967689	0.381434	0.637949	-7.47903	-0.00892741	5.15663	-0.121718	0.908208	0.943322	-8.17279	856	1185	1296	1267	1122	1315	1189	1131	1021	10382
Bmp1	ENSMUSG00000022098,10	0.0588944	4.87938	0.379265	0.721508	0.96692	-8.28709	0.0672458	4.85643	0.487445	0.648349	0.828542	-7.83692	0.00429717	4.90561	0.0226348	0.982881	0.99047	-8.14754	1039	908	1014	1311	969	858	792	1083	966	8940
Bmp2k	ENSMUSG00000034663,13	0.0292457	3.78518	0.201262	0.849162	0.96692	-8.21726	0.179267	3.83128	1.12019	0.31786	0.557569	-7.18954	0.147019	3.86745	1.45207	0.210471	0.390253	-6.93739	376	505	531	459	480	494	438	557	452	4292
Bmp3	ENSMUSG00000029335,5	0.188179	4.11172	5.22145	0.00440773	0.817872	-2.88631	0.167917	4.07275	0.769406	0.479392	0.698578	-7.55463	-0.0229283	4.18742	-0.107288	0.919036	0.949493	-8.03643	536	555	568	674	637	589	451	791	504	5305
Bmp4	ENSMUSG00000021835,15	-0.223464	2.71024	-0.407958	0.701751	0.96692	-7.97781	0.328373	2.95378	0.418517	0.694445	0.854858	-7.63353	0.553006	2.85899	0.798093	0.463626	0.64434	-7.4358	475	188	158	266	244	136	205	699	142	2513
Bmp5	ENSMUSG00000032179,7	0.257313	2.93695	1.73123	0.149616	0.96692	-6.71278	0.175153	2.86805	1.04697	0.347143	0.595553	-7.12703	-0.0857326	3.01732	-0.658626	0.541355	0.704011	-7.58109	196	249	279	331	279	255	217	291	234	2331
Bmp6	ENSMUSG00000039004,6	-0.234847	3.94791	-0.485284	0.649889	0.96692	-8.12264	-0.0716628	4.00153	-0.116657	0.912068	0.955836	-7.87612	0.16138	3.90099	0.232595	0.825969	0.91448	-7.96521	824	461	495	894	437	294	305	1168	337	5215
Bmp7	ENSMUSG00000008999,7	-0.351211	4.54996	-0.554415	0.605384	0.96692	-8.15408	-0.180639	4.60721	-0.260188	0.805996	0.921831	-7.91097	0.168924	4.44815	0.214438	0.839294	0.916155	-8.05527	1528	701	694	1374	762	340	459	1809	455	8122
Bmper	ENSMUSG00000031963,8	0.0916961	4.75541	0.429606	0.687023	0.96692	-8.24916	0.304312	4.83348	1.73951	0.147728	0.311664	-6.5624	0.208815	4.90067	1.44805	0.211532	0.391852	-7.0968	687	1013	1023	935	1139	821	1064	952	999	8633
Bmpr1a	ENSMUSG00000021796,15	0.134953	6.62375	0.59883	0.577789	0.96692	-8.34711	0.119424	6.58744	0.515681	0.629964	0.815239	-7.9784	-0.0189986	6.67626	-0.223924	0.832324	0.916155	-8.34349	2286	3662	3962	3612	3306	3732	2951	3601	3016	30128
Bmpr1b	ENSMUSG00000052430,15	-0.12687	2.2183	-0.430019	0.686743	0.96692	-7.8772	0.115341	2.3105	0.794916	0.465802	0.692601	-7.26709	0.239122	2.26818	0.881307	0.421386	0.618815	-7.2339	137	169	196	168	103	204	169	182	141	1469
Bmpr2	ENSMUSG00000067336,6	0.0340747	8.19626	0.184251	0.861729	0.96692	-8.6937	0.0945138	8.19739	0.509603	0.633896	0.818164	-8.11117	0.0570566	8.23608	0.409703	0.700219	0.824402	-8.45593	7746	10760	11624	9229	10330	11084	11309	9248	8491	89821
Bms1	ENSMUSG00000030138,8	-0.0198473	5.20184	-0.135836	0.897743	0.96692	-8.39756	-0.0105255	5.17811	-0.068718	0.948109	0.974851	-8.0064	0.00620551	5.1882	0.0599164	0.954712	0.972911	-8.18382	1511	1149	1169	1409	1251	1115	1249	1233	967	11053
Bmt2	ENSMUSG00000042742,7	0.0325839	4.13275	0.121814	0.908232	0.96692	-8.27714	0.16002	4.16672	0.606623	0.572875	0.77909	-7.68877	0.125003	4.20513	0.772948	0.477002	0.64441	-7.70525	409	691	732	553	579	704	576	732	515	5491
Bmyc	ENSMUSG00000049086,8	-0.0610441	5.23177	-0.92063	0.403337	0.96692	-7.93834	0.0174811	5.24241	0.170383	0.87197	0.94225	-7.99783	0.0752752	5.23252	0.888902	0.417686	0.615199	-7.74893	1415	1248	1275	1288	1218	1279	1378	1202	1059	11362
Bnc1	ENSMUSG00000025105,9	0.0909309	5.4163	0.946939	0.391115	0.96692	-7.93302	0.0240894	5.35519	0.159072	0.880379	0.946495	-8.01077	-0.0711735	5.42161	-0.463219	0.664084	0.799129	-8.08922	1267	1511	1473	1506	1642	1396	1431	1105	1416	12747
Bnc2	ENSMUSG00000028487,18	0.058584	6.30399	0.629768	0.559048	0.96692	-8.29301	0.0333386	6.26312	0.443439	0.677585	0.845912	-7.99069	-0.0289171	6.31325	-0.264376	0.80281	0.898086	-8.28723	2526	2770	2642	2750	3077	2499	2699	2318	2385	23666
Bnip1	ENSMUSG00000024191,15	0.153077	3.95315	1.92208	0.118208	0.96692	-6.61526	0.0109438	3.85366	0.142121	0.893016	0.952253	-7.85433	-0.145573	3.95079	-3.5714	0.0181329	0.201968	-4.28547	542	454	512	586	573	522	469	486	425	4569
Bnip2	ENSMUSG00000011958,17	0.0428059	5.28908	1.36726	0.234874	0.96692	-7.46377	0.0546133	5.26673	0.799598	0.463339	0.692601	-7.65365	0.0084098	5.30867	0.131625	0.900787	0.941619	-8.19144	1341	1274	1333	1452	1337	1297	1168	1397	1176	11775
Bnip3	ENSMUSG00000078566,8	0.213269	5.58444	1.2011	0.288376	0.96692	-7.68582	0.25409	5.57498	1.35757	0.237593	0.452703	-7.1041	0.0384704	5.70324	0.201383	0.848914	0.916155	-8.22851	1257	1629	1718	1613	1649	2094	1814	1941	1272	14987
Bnip3l	ENSMUSG00000022051,15	0.0911359	5.91554	0.849332	0.438012	0.96692	-8.07642	0.160876	5.92135	1.04918	0.346228	0.594255	-7.47758	0.0669009	5.98807	0.534232	0.617731	0.76434	-8.12087	1728	2018	2283	2151	2017	2249	1934	2496	1732	18608
Boc	ENSMUSG00000022687,12	0.0648396	4.28558	0.459822	0.666734	0.96692	-8.17884	0.186358	4.31762	0.812149	0.456786	0.692601	-7.54632	0.118896	4.37021	0.455489	0.669242	0.802437	-7.94822	669	632	653	770	759	546	548	966	576	6119
Bod1	ENSMUSG00000044502,16	0.0816822	5.1046	1.05401	0.344508	0.96692	-7.79239	0.0351125	5.05282	0.43563	0.682845	0.848079	-7.88409	-0.0498428	5.11426	-1.3338	0.243895	0.423434	-7.26166	1254	1091	1089	1231	1234	1176	1058	1150	990	10273
Bod1l	ENSMUSG00000061755,10	-0.0618619	6.81299	-0.374686	0.724685	0.96692	-8.4925	-0.0510737	6.78958	-0.250453	0.813069	0.925897	-8.11475	0.00784325	6.77912	0.0514218	0.961126	0.976902	-8.38465	4828	3487	3590	3806	4097	3446	4251	3394	2826	33725
Bok	ENSMUSG00000026278,14	-0.115809	2.73961	-0.972521	0.379525	0.96692	-7.55943	0.150117	2.84406	1.73565	0.148438	0.312889	-6.31365	0.262183	2.80813	1.87766	0.123633	0.249524	-6.19872	239	224	248	193	233	236	230	232	257	2092
Bola1	ENSMUSG00000015943,11	-0.192276	2.94353	-1.67046	0.161338	0.96692	-6.79128	-0.13606	2.94287	-0.930173	0.398621	0.654171	-7.25395	0.0527852	2.86727	0.525782	0.623146	0.768573	-7.63904	325	260	261	246	250	243	271	220	209	2285
Bola2	ENSMUSG00000047721,8	-0.173494	3.89889	-0.846239	0.439569	0.96692	-7.85127	-0.00407381	3.9544	-0.0197092	0.985104	0.993103	-7.87875	0.166601	3.88811	1.56477	0.182785	0.347269	-6.80236	694	512	445	460	522	464	550	507	421	4575
Bola3	ENSMUSG00000045160,14	-0.284436	3.51354	-2.6264	0.0512033	0.96692	-5.64558	-0.00757232	3.62242	-0.0569509	0.956982	0.979272	-7.83481	0.274232	3.50126	1.92281	0.116898	0.238068	-6.27799	422	394	478	359	394	315	434	433	312	3541
Bop1	ENSMUSG00000022557,11	0.00359013	5.35145	0.0354185	0.973244	0.998181	-8.42419	-0.0542306	5.29439	-0.455461	0.669529	0.841319	-7.89687	-0.0615131	5.31671	-0.965404	0.38185	0.579236	-7.68719	1594	1274	1330	1442	1377	1386	1333	1159	1175	12070
Bora	ENSMUSG00000022070,7	0.0880267	2.59791	0.704118	0.51568	0.96692	-7.77151	-0.0142903	2.51992	-0.0994813	0.924958	0.962167	-7.65814	-0.106886	2.58495	-0.944642	0.391318	0.58957	-7.245	170	203	232	232	191	220	168	177	198	1791
Borcs5	ENSMUSG00000042992,15	-0.0621286	3.6157	-1.61584	0.172454	0.96692	-6.96132	0.0460068	3.64104	0.639783	0.552903	0.763036	-7.60091	0.105041	3.63055	1.60451	0.173909	0.332799	-6.70867	409	445	429	435	392	407	433	428	348	3726
Borcs6	ENSMUSG00000045176,3	-0.0231013	3.25831	-0.112624	0.915117	0.970222	-8.15939	-0.0253794	3.22854	-0.116018	0.912547	0.956103	-7.77285	-0.00573679	3.23704	-0.0777183	0.941286	0.963795	-7.87381	439	286	284	333	326	316	332	288	265	2869
Borcs7	ENSMUSG00000062376,7	-0.0353825	4.37231	-0.564847	0.598831	0.96692	-8.12732	0.0671736	4.39514	0.843638	0.440656	0.692601	-7.52725	0.0990629	4.39841	1.66049	0.162131	0.314042	-6.76196	648	753	751	708	695	701	749	667	635	6307
Borcs8	ENSMUSG00000002345,18	-0.0325804	3.69369	-0.201325	0.849116	0.96692	-8.205	0.0160554	3.68983	0.0995997	0.924869	0.962111	-7.83969	0.0452994	3.69335	0.408942	0.70074	0.824771	-7.86278	540	414	399	484	457	380	383	474	381	3912
Bpgm	ENSMUSG00000038871,5	-0.219777	4.8359	-1.96101	0.112697	0.96692	-6.6694	0.192287	5.01335	1.05758	0.34276	0.589348	-7.38459	0.408863	4.92431	2.50479	0.0578563	0.201968	-5.74052	1192	948	1031	881	959	884	896	1342	1087	9220
Bphl	ENSMUSG00000038286,11	0.0432924	2.93166	0.288118	0.785891	0.96692	-8.0652	0.162264	2.96318	0.91245	0.406957	0.662689	-7.27487	0.115518	3.00556	0.969013	0.380224	0.577718	-7.31216	205	286	287	293	264	241	229	308	252	2365
Bpnt1	ENSMUSG00000026617,16	-0.0335036	5.66439	-0.777109	0.475463	0.96692	-8.11261	-0.067752	5.61902	-0.734309	0.498566	0.716283	-7.74027	-0.0380074	5.6232	-0.398613	0.707828	0.829645	-8.14782	1658	1792	1810	1714	1696	1748	1715	1392	1474	14999
Bptf	ENSMUSG00000040481,17	-0.0128897	7.0637	-0.116553	0.912172	0.968641	-8.59385	-0.0582242	7.01273	-0.5103	0.633445	0.817801	-8.01706	-0.0485819	7.02657	-0.566787	0.59713	0.749665	-8.22726	5197	4297	4334	4942	4703	4096	4427	4123	3529	39648
Braf	ENSMUSG00000002413,15	0.0833053	5.57074	0.462313	0.665076	0.96692	-8.32101	0.00342768	5.50198	0.0206797	0.984371	0.992978	-8.03951	-0.0832078	5.56516	-1.1129	0.319978	0.509071	-7.56851	1217	1792	1795	1569	1717	1755	1478	1491	1348	14162
Brap	ENSMUSG00000029458,14	0.0224918	6.21318	0.297282	0.779316	0.96692	-8.4621	-0.0570729	6.14526	-0.588982	0.583687	0.787005	-7.89403	-0.0832365	6.17704	-1.0954	0.326834	0.516994	-7.66432	2744	2367	2448	2683	2411	2605	2436	2082	2095	21871
Brat1	ENSMUSG00000000148,17	0.145578	4.4052	3.96054	0.0129015	0.96692	-4.18097	0.0673196	4.33794	1.53434	0.190728	0.389773	-6.76798	-0.0819081	4.4314	-2.60168	0.0511842	0.201968	-5.54212	648	714	703	804	739	750	688	653	627	6326
Brca1	ENSMUSG00000017146,12	-0.0212553	3.25197	-0.174451	0.86899	0.96692	-8.14766	-0.0216883	3.22452	-0.139017	0.895334	0.952693	-7.7687	-0.00448248	3.23441	-0.0335569	0.974624	0.985968	-7.87629	278	343	368	370	296	310	250	331	306	2852
Brca2	ENSMUSG00000041147,10	-0.0110773	3.48836	-0.079411	0.940072	0.985519	-8.19718	0.0157587	3.47382	0.100372	0.924289	0.961795	-7.81056	0.0231613	3.48934	0.300733	0.776603	0.881582	-7.87138	309	428	429	400	386	364	321	386	357	3380
Brcc3	ENSMUSG00000031201,17	0.0206476	5.38818	0.251123	0.812641	0.96692	-8.3907	-0.0288713	5.33477	-0.374481	0.724737	0.873088	-7.94011	-0.0528651	5.36619	-0.960929	0.383875	0.581379	-7.69802	1263	1495	1515	1421	1426	1494	1347	1292	1165	12418
Brd1	ENSMUSG00000022387,17	0.0107436	5.45764	0.226229	0.830813	0.96692	-8.40527	-0.0248266	5.41165	-0.56913	0.596008	0.793497	-7.84092	-0.0390453	5.43753	-1.83188	0.128739	0.258343	-6.68263	1545	1505	1438	1588	1443	1509	1346	1395	1272	13041
Brd2	ENSMUSG00000024335,20	-0.0368768	7.7633	-0.430326	0.686536	0.96692	-8.56122	-0.104114	7.70178	-1.00035	0.366975	0.621066	-7.67574	-0.0710296	7.70375	-1.00266	0.365337	0.562746	-7.9427	8316	7282	7018	7733	7410	6944	6783	5973	6360	63819
Brd3	ENSMUSG00000026918,16	0.0302926	6.09152	0.418211	0.694756	0.96692	-8.39825	-0.0774423	6.00953	-1.21438	0.283426	0.510397	-7.30761	-0.111137	6.04495	-2.30771	0.0730767	0.201968	-6.14179	2460	2267	2197	2603	2203	2299	2024	2112	1834	19999
Brd3os	ENSMUSG00000109946,1	0.0876916	3.63132	1.25918	0.268591	0.96692	-7.39204	0.0291951	3.57298	0.379635	0.721159	0.870915	-7.74398	-0.0613275	3.63765	-0.783518	0.471345	0.64434	-7.60238	427	410	394	429	462	423	377	429	340	3691
Brd4	ENSMUSG00000024002,18	-0.0335067	6.58942	-0.540839	0.613978	0.96692	-8.38125	-0.143196	6.50647	-1.96874	0.11128	0.245095	-6.41976	-0.113213	6.51007	-1.68908	0.156432	0.304394	-7.00274	3505	3274	3213	3558	3043	3210	3015	2702	2527	28047
Brd7	ENSMUSG00000031660,13	-0.0873291	5.8206	-0.792031	0.467534	0.96692	-8.11644	-0.092399	5.78966	-0.772144	0.47792	0.697675	-7.72486	-0.00840335	5.76645	-0.174964	0.868473	0.925264	-8.2425	2305	1821	1877	1950	1881	1811	1840	1725	1539	16749
Brd8	ENSMUSG00000003778,14	-0.00807711	5.60713	-0.173116	0.869981	0.96692	-8.43396	-0.0477285	5.55919	-0.890575	0.41744	0.673056	-7.59993	-0.043147	5.5756	-1.22008	0.280708	0.460773	-7.45257	1700	1711	1600	1771	1638	1595	1424	1570	1418	14427
Brd9	ENSMUSG00000057649,6	-0.13188	5.97589	-0.859008	0.433173	0.96692	-8.07401	-0.107634	5.95987	-0.591281	0.582271	0.786127	-7.8761	0.0207693	5.91408	0.180316	0.864501	0.922662	-8.26004	2721	2154	1946	2186	2110	1898	2251	1761	1728	18755
Brdt	ENSMUSG00000029279,15	0.0648163	4.00207	0.94593	0.391578	0.96692	-7.77215	0.100532	3.99141	1.36475	0.235489	0.449481	-6.93318	0.03236	4.04457	0.471269	0.658735	0.79565	-7.88943	515	573	518	564	588	534	572	516	480	4860
Brf1	ENSMUSG00000011158,8	0.0516784	4.94538	0.352925	0.739871	0.96692	-8.3058	-0.0619357	4.8608	-0.460455	0.666198	0.839164	-7.85207	-0.117292	4.90654	-1.76164	0.142864	0.281737	-6.70489	1230	981	916	1211	1058	969	932	909	862	9068
Brf2	ENSMUSG00000031487,5	0.026098	3.42784	0.558352	0.602906	0.96692	-8.00848	-0.0578317	3.35835	-0.824468	0.450423	0.692601	-7.41461	-0.0881211	3.39215	-1.37649	0.231285	0.405768	-6.943	338	371	384	393	353	371	316	309	330	3165
Bri3	ENSMUSG00000047843,16	-0.16762	3.17716	-2.16734	0.0877168	0.96692	-6.18832	0.106405	3.28536	2.38107	0.0673061	0.154165	-5.5457	0.270793	3.22296	4.13965	0.0105121	0.201968	-3.52733	303	332	347	280	287	311	319	336	306	2821
Bri3bp	ENSMUSG00000037905,13	0.0731509	5.14699	0.931924	0.398053	0.96692	-7.91841	0.0343973	5.0992	0.452149	0.671743	0.842944	-7.88005	-0.0423524	5.15685	-1.26537	0.26547	0.442652	-7.34653	1103	1108	1342	1264	1204	1272	1138	1117	1044	10592
Brinp1	ENSMUSG00000028351,5	0.00506517	6.25109	0.0600027	0.954694	0.994796	-8.51717	0.0201309	6.22983	0.278694	0.792608	0.915368	-8.05808	0.0118532	6.25335	0.129241	0.902572	0.942173	-8.3119	2700	2594	2499	2455	2756	2649	2645	2383	2177	22858
Brinp2	ENSMUSG00000004031,13	-0.0082265	6.49784	-0.102708	0.922558	0.974913	-8.53827	-0.0359829	6.45581	-0.328031	0.757334	0.895465	-8.0597	-0.0314444	6.47233	-0.273404	0.796273	0.894461	-8.30387	3154	3216	2925	3125	3311	2852	3145	2494	2642	26864
Brinp3	ENSMUSG00000035131,14	-0.0350915	3.15365	-0.179709	0.865092	0.96692	-8.13133	-0.32993	2.97691	-1.77995	0.140493	0.298101	-6.27615	-0.298004	2.98029	-1.16492	0.300342	0.485708	-7.10062	319	277	328	311	234	375	293	206	181	2524
Brip1	ENSMUSG00000034329,16	0.168481	1.74	0.756189	0.486748	0.96692	-7.56472	0.147914	1.7027	0.550138	0.607945	0.801465	-7.33384	-0.0247236	1.80794	-0.125066	0.905699	0.942173	-7.55233	85	99	146	144	106	116	85	133	112	1026
Brip1os	ENSMUSG00000085208,3	0.120794	5.57097	1.01622	0.360387	0.96692	-7.88105	0.0626393	5.51384	0.480385	0.652992	0.831841	-7.90391	-0.0618831	5.5951	-0.936309	0.395172	0.592915	-7.75142	1311	1580	1821	1852	1635	1622	1376	1620	1453	14270
Brix1	ENSMUSG00000022247,12	-0.0324252	5.0276	-0.351167	0.741103	0.96692	-8.31563	-0.0260373	5.00232	-0.321788	0.761762	0.898366	-7.92993	0.00283711	5.00723	0.0360281	0.972756	0.98468	-8.1609	1005	1178	1206	1091	1044	1188	1084	982	957	9735
Brk1	ENSMUSG00000033940,8	0.076604	5.89938	1.9576	0.113167	0.96692	-6.78812	0.105068	5.8853	3.53239	0.0187664	0.129487	-4.39618	0.0248874	5.94448	0.706677	0.513606	0.679064	-7.99553	1892	2035	2031	2107	2142	2058	1982	1960	1886	18093
Brms1l	ENSMUSG00000012076,8	0.0540675	5.67085	0.897205	0.414479	0.96692	-8.00714	0.00457099	5.61738	0.0774913	0.9415	0.971435	-8.04672	-0.0527179	5.66531	-0.764303	0.481666	0.648934	-7.91397	1757	1696	1670	1724	1834	1784	1694	1579	1412	15150
Brox	ENSMUSG00000046836,13	0.163647	6.35711	1.23423	0.276933	0.96692	-7.72924	0.0924986	6.29334	0.64349	0.550699	0.761471	-7.86928	-0.0750004	6.39631	-0.902379	0.411184	0.608107	-7.8839	2173	2992	2845	2925	2946	3059	2736	2390	2586	24652
Brpf1	ENSMUSG00000001632,16	0.0421171	4.47375	0.467837	0.661406	0.96692	-8.19687	-0.00145072	4.42403	-0.0174764	0.986791	0.993912	-7.93259	-0.0472458	4.46522	-0.892482	0.415951	0.613408	-7.63898	824	722	703	858	728	738	716	683	641	6613
Brpf3	ENSMUSG00000063952,16	-0.0205104	3.92345	-0.27197	0.797527	0.96692	-8.21521	-0.0836767	3.86335	-0.874044	0.425503	0.679503	-7.43786	-0.0663485	3.87349	-1.14453	0.307907	0.494526	-7.29257	562	524	482	536	500	513	428	504	415	4464
Brsk1	ENSMUSG00000035390,16	0.031276	7.23081	0.356631	0.737275	0.96692	-8.54243	-0.0796665	7.14724	-0.789855	0.468475	0.692601	-7.82626	-0.114635	7.18344	-1.97192	0.110005	0.227191	-6.7188	5655	4881	4738	5273	5215	5134	4612	4172	4335	44015
Brsk2	ENSMUSG00000053046,16	0.100789	6.48992	2.31104	0.0738836	0.96692	-6.3898	-0.079958	6.37163	-0.953429	0.387893	0.643959	-7.61254	-0.184626	6.44258	-2.31217	0.072687	0.201968	-6.18481	3049	2976	2872	3323	3220	3038	2755	2356	2561	26150
Brwd1	ENSMUSG00000022914,17	0.0335433	5.67913	0.290199	0.784396	0.96692	-8.40891	0.0703356	5.66893	0.652752	0.545218	0.756722	-7.80721	0.0333705	5.7069	0.683724	0.526735	0.690664	-7.98304	1457	1887	1880	1732	1801	1802	1722	1686	1552	15519
Brwd3	ENSMUSG00000063663,11	0.0340419	4.06648	0.340436	0.748649	0.96692	-8.2082	-0.0639892	3.98855	-0.557191	0.603495	0.798279	-7.7002	-0.100981	4.02657	-1.18758	0.292128	0.475362	-7.27018	490	589	625	599	610	537	497	559	427	4933
Bscl2	ENSMUSG00000071657,12	0.119402	5.32749	1.50267	0.198753	0.96692	-7.30471	0.0324948	5.25602	0.363723	0.73223	0.878625	-7.93739	-0.0907256	5.3366	-1.73127	0.148389	0.29101	-6.80136	1168	1433	1360	1459	1448	1399	1217	1207	1250	11941
Bsdc1	ENSMUSG00000040859,14	-0.0148505	5.0424	-0.138089	0.89606	0.96692	-8.37981	0.0357143	5.03947	0.329304	0.756432	0.894838	-7.9307	0.0471865	5.05229	1.59021	0.17659	0.337221	-6.94218	1298	1075	1038	1204	1078	1093	1060	1126	982	9954
Bsg	ENSMUSG00000023175,15	-0.110742	8.75622	-0.393713	0.711527	0.96692	-8.67556	-0.0236633	8.77145	-0.082037	0.938077	0.969552	-8.30324	0.0842989	8.73593	0.81029	0.45724	0.643891	-8.23821	22696	12376	12896	15893	14236	12825	14782	15223	11491	132418
Bsn	ENSMUSG00000032589,14	-0.0040651	7.11901	-0.0301809	0.977199	0.998181	-8.60714	-0.0810934	7.05212	-0.508385	0.634686	0.818746	-8.02142	-0.0806904	7.07089	-0.467542	0.661209	0.79673	-8.29141	5303	4470	4534	4570	5467	4319	4958	3554	3878	41053
Bst2	ENSMUSG00000046718,8	-0.169491	2.41475	-1.08949	0.330152	0.96692	-7.38201	-0.0802001	2.43109	-0.334264	0.752924	0.892609	-7.58091	0.0861413	2.3665	0.4002	0.706737	0.828683	-7.5963	206	158	220	199	169	151	132	225	153	1613
Btaf1	ENSMUSG00000040565,8	0.121058	5.21941	0.857937	0.433707	0.96692	-7.99484	0.130254	5.19495	1.4714	0.206278	0.417263	-6.9324	0.00608382	5.2769	0.0423932	0.967946	0.98144	-8.19665	1308	1153	1202	1149	1415	1456	1120	1344	1188	11335
Btbd1	ENSMUSG00000025103,8	0.00573206	5.83139	0.0567556	0.957142	0.996188	-8.4738	0.113097	5.85641	1.24245	0.273839	0.497052	-7.26259	0.104026	5.88047	1.89479	0.121031	0.244967	-6.66063	1680	2069	2101	1898	1954	2021	1890	2046	1799	17458
Btbd10	ENSMUSG00000038187,14	0.0391801	5.48457	0.385999	0.716848	0.96692	-8.34981	0.0198976	5.44643	0.178107	0.866238	0.939661	-8.01539	-0.0228276	5.48715	-0.268766	0.799629	0.896533	-8.18165	1313	1657	1576	1509	1570	1592	1546	1320	1319	13402
Btbd11	ENSMUSG00000020042,15	0.0415706	4.35099	0.537199	0.616294	0.96692	-8.14214	-0.0917735	4.25603	-0.91635	0.405111	0.660761	-7.44494	-0.137175	4.29789	-1.45918	0.208608	0.387485	-6.9961	685	628	752	704	748	679	653	543	568	5960
Btbd2	ENSMUSG00000003344,14	0.0519695	6.39226	1.41639	0.221222	0.96692	-7.52071	0.00962544	6.34318	0.184682	0.861367	0.936427	-8.09408	-0.0461723	6.3897	-0.862269	0.430775	0.627565	-7.91994	2875	2799	2781	3103	2937	2767	2661	2500	2585	25008
Btbd3	ENSMUSG00000062098,11	0.175473	5.90524	1.35543	0.23856	0.96692	-7.54272	0.100551	5.83922	0.807598	0.459154	0.692601	-7.69949	-0.0783414	5.94814	-0.945782	0.390794	0.589099	-7.78713	1633	1940	2253	2215	2004	2349	1794	2088	1769	18045
Btbd6	ENSMUSG00000002803,14	0.0356982	4.32663	0.961764	0.384363	0.96692	-7.7966	0.0220462	4.29218	0.243493	0.81814	0.929186	-7.88239	-0.0177598	4.33081	-0.186953	0.859582	0.919038	-8.04418	655	691	684	708	716	666	586	613	681	6000
Btbd7	ENSMUSG00000041702,7	0.139065	5.95536	1.24194	0.27433	0.96692	-7.67904	0.106926	5.91076	0.930322	0.398551	0.654171	-7.59451	-0.0355812	6.00146	-0.741674	0.494032	0.660853	-7.97494	1698	2129	2276	2230	2203	2268	1912	2149	1884	18749
Btbd8	ENSMUSG00000111375,4	0.0310992	4.62537	0.310034	0.770202	0.96692	-8.28672	-0.0652134	4.54826	-0.628427	0.55969	0.768466	-7.71554	-0.0995189	4.58514	-0.899847	0.412399	0.609466	-7.64944	748	888	871	797	880	893	829	702	653	7261
Btbd9	ENSMUSG00000062202,14	0.0313451	5.05626	0.292951	0.78242	0.96692	-8.34111	-0.0551678	4.98534	-0.506037	0.63621	0.819846	-7.83892	-0.090464	5.02125	-1.23352	0.276102	0.455996	-7.36439	1273	1065	1048	1245	1173	1049	998	951	1005	9807
Btd	ENSMUSG00000021900,10	-0.032535	4.14821	-0.725502	0.503653	0.96692	-7.98461	0.0222654	4.14754	0.210296	0.84246	0.933868	-7.87503	0.051365	4.15165	0.459983	0.666241	0.800446	-7.91241	597	615	625	666	566	575	500	667	542	5353
Btf3	ENSMUSG00000021660,14	0.0726905	6.50109	0.819058	0.453426	0.96692	-8.16358	0.039482	6.45621	0.37019	0.727721	0.875335	-8.04233	-0.0364006	6.51282	-0.449598	0.673187	0.80567	-8.23369	3324	2913	2838	3470	3173	2933	2687	3239	2575	27152
Btf3l4	ENSMUSG00000028568,16	0.10475	4.53186	1.10822	0.322787	0.96692	-7.67123	0.0191723	4.46073	0.215596	0.838562	0.933868	-7.90864	-0.0891076	4.53416	-1.45877	0.208716	0.387632	-7.03185	681	845	767	800	821	847	679	726	702	6868
Btg1	ENSMUSG00000036478,8	0.154633	4.44473	0.860002	0.432678	0.96692	-7.90598	0.0132785	4.34549	0.070475	0.946785	0.974225	-7.92111	-0.144745	4.44423	-2.53132	0.0560889	0.201968	-5.63842	535	760	859	795	773	796	614	718	614	6464
Btg2	ENSMUSG00000020423,6	0.0158588	2.71986	0.114383	0.913799	0.969487	-8.07157	0.126269	2.74539	0.569536	0.595755	0.793497	-7.51321	0.108005	2.77486	0.621793	0.563299	0.723511	-7.55698	190	212	276	233	233	215	194	296	189	2038
Btrc	ENSMUSG00000025217,15	0.0618092	5.96652	0.852154	0.436597	0.96692	-8.07923	-0.00422394	5.90523	-0.0791693	0.940236	0.970693	-8.07253	-0.0694516	5.95669	-1.33336	0.244029	0.423613	-7.37094	2120	2179	1978	2256	2304	2022	1961	1945	1786	18551
Bub1	ENSMUSG00000027379,13	0.019889	3.16443	0.070854	0.946516	0.98948	-8.14954	-0.00722685	3.12451	-0.0239992	0.981862	0.992158	-7.76479	-0.0316978	3.15457	-0.118065	0.910948	0.945148	-7.85253	229	295	415	417	264	268	207	348	290	2733
Bub1b	ENSMUSG00000040084,9	-0.0385408	3.82042	-0.149369	0.887643	0.96692	-8.23287	-0.064661	3.78105	-0.294322	0.781367	0.909502	-7.80503	-0.0310378	3.78126	-0.142099	0.892955	0.938437	-7.96519	551	371	572	650	419	399	363	465	457	4247
Bub3	ENSMUSG00000066979,6	0.0282297	5.69189	0.557047	0.603727	0.96692	-8.27817	-0.0227088	5.63842	-0.381926	0.719572	0.869642	-7.96489	-0.0547059	5.67326	-1.16737	0.299444	0.484754	-7.52354	1621	1831	1800	1869	1807	1698	1518	1602	1579	15325
Bud13	ENSMUSG00000032077,5	-0.0937456	3.49303	-0.938033	0.395218	0.96692	-7.71148	-0.1964	3.41309	-1.84741	0.129228	0.277584	-6.25675	-0.106088	3.38689	-2.51079	0.0574514	0.201968	-5.4906	450	357	389	377	374	369	337	318	291	3262
Bud23	ENSMUSG00000005378,17	-0.175871	3.44243	-1.44754	0.212836	0.96692	-7.14392	-0.0664359	3.46927	-0.502957	0.638211	0.821042	-7.66608	0.105408	3.402	1.68771	0.1567	0.304842	-6.56206	459	344	388	354	344	353	336	337	355	3270
Bud31	ENSMUSG00000038722,17	-0.0031382	5.96575	-0.0299587	0.977367	0.998181	-8.48926	0.0411688	5.95905	0.412364	0.69864	0.857283	-7.97956	0.0410751	5.97874	0.533733	0.618049	0.764529	-8.11998	1856	2225	2360	2070	2094	2266	2164	2066	1787	18888
Bves	ENSMUSG00000071317,4	0.129662	5.25095	0.451013	0.672616	0.96692	-8.29277	0.0279525	5.17209	0.0972337	0.926647	0.962967	-8.00301	-0.105785	5.25842	-0.938624	0.394098	0.592472	-7.7053	812	1522	1552	1383	1228	1502	1209	1069	1189	11466
Bysl	ENSMUSG00000023988,8	-0.00407989	4.96525	-0.0430933	0.96745	0.998181	-8.38175	-0.0567237	4.9109	-0.565457	0.598305	0.794877	-7.7951	-0.0564128	4.92942	-1.18651	0.292511	0.475817	-7.40445	1206	991	1020	1094	1031	1084	932	928	943	9229
Bzw1	ENSMUSG00000051223,14	0.0867353	8.07777	0.402008	0.705826	0.96692	-8.60594	0.11054	8.06094	0.55023	0.607886	0.801451	-8.07613	0.020215	8.12588	0.254923	0.809675	0.903237	-8.50448	6551	10155	10778	9009	9335	10372	8850	9116	8432	82598
Bzw2	ENSMUSG00000020547,5	0.0913742	6.75958	3.61327	0.0177389	0.96692	-4.80947	0.0390714	6.70525	1.62991	0.167523	0.348018	-6.87	-0.0558362	6.77148	-2.00494	0.105613	0.21923	-6.62666	3607	3512	3640	4109	3739	3671	3491	3433	3140	32342
C030006K11Rik	ENSMUSG00000116138,1	0.100937	1.6953	0.817192	0.454389	0.96692	-7.50444	0.0499788	1.64008	0.337344	0.750748	0.891047	-7.43115	-0.0537923	1.71158	-0.41641	0.695637	0.820889	-7.43552	105	93	123	121	123	101	108	114	81	969
C030017B01Rik	ENSMUSG00000118202,1	0.0129872	4.33181	0.0639318	0.951732	0.992876	-8.30786	-0.0230918	4.28489	-0.109068	0.917759	0.958308	-7.9101	-0.0393894	4.31298	-0.249524	0.813605	0.905925	-8.02503	522	801	765	653	648	789	739	561	554	6032
C130013H08Rik	ENSMUSG00000105509,1	0.0120705	1.51581	0.0724962	0.945279	0.988792	-7.8435	-0.0246285	1.46957	-0.137718	0.896305	0.953141	-7.45395	-0.040071	1.49633	-0.329188	0.756326	0.866577	-7.42219	80	118	96	103	87	105	76	98	87	850
C130071C03Rik	ENSMUSG00000050334,12	0.119888	2.22001	0.45512	0.66987	0.96692	-7.86458	-0.0471488	2.10901	-0.222698	0.833348	0.933868	-7.55931	-0.171013	2.19036	-0.847557	0.438143	0.631883	-7.24519	117	194	155	165	133	209	129	129	145	1376
C130074G19Rik	ENSMUSG00000039349,5	-0.241137	3.52589	-1.42096	0.219971	0.96692	-7.1875	-0.191636	3.52286	-0.96586	0.382257	0.638686	-7.30617	0.04581	3.42223	0.356411	0.737137	0.852033	-7.83722	529	362	408	405	330	357	292	398	339	3420
C1d	ENSMUSG00000000581,8	0.0230636	6.23204	0.362772	0.732981	0.96692	-8.43833	-0.0127129	6.18528	-0.153548	0.884493	0.948377	-8.08673	-0.0389282	6.21783	-0.381173	0.719873	0.838458	-8.23069	2534	2550	2555	2489	2572	2742	2623	2289	2013	22367
C1galt1	ENSMUSG00000042460,5	0.0923291	4.8792	0.292926	0.782439	0.96692	-8.32152	0.200418	4.90461	0.665479	0.537748	0.750294	-7.72548	0.104469	4.97272	1.09617	0.326532	0.516693	-7.50837	615	1141	1310	1004	964	1171	1053	1022	979	9259
C1galt1c1	ENSMUSG00000048970,9	-0.0165059	4.79417	-0.115497	0.912964	0.969017	-8.35571	0.104629	4.82539	0.88067	0.422257	0.676084	-7.53885	0.118159	4.83886	0.989335	0.371173	0.569075	-7.59956	818	967	1091	852	963	1033	1024	966	816	8530
C1qa	ENSMUSG00000036887,5	-0.33522	2.12885	-1.62646	0.170404	0.96692	-6.69914	0.0185894	2.27731	0.0666215	0.94969	0.975496	-7.61786	0.351045	2.12871	1.49465	0.199558	0.373624	-6.53143	214	139	158	159	122	121	125	216	135	1389
C1qb	ENSMUSG00000036905,8	-0.202207	3.03701	-0.903689	0.41137	0.96692	-7.67445	0.124996	3.17205	0.374471	0.724744	0.873088	-7.6887	0.324391	3.09071	1.02895	0.354048	0.549454	-7.26934	377	243	296	296	290	209	214	449	274	2648
C1qbp	ENSMUSG00000018446,8	0.000759791	6.18905	0.0136869	0.989658	0.998181	-8.51284	0.0213598	6.171	0.39069	0.713514	0.866042	-8.00844	0.0172593	6.19191	0.439193	0.680185	0.810122	-8.19965	2568	2536	2375	2595	2553	2365	2418	2376	2116	21902
C1qc	ENSMUSG00000036896,5	-0.252767	2.78184	-1.90437	0.120807	0.96692	-6.46477	0.153448	2.95635	0.519932	0.627223	0.812803	-7.57912	0.403514	2.84999	1.38102	0.229983	0.403932	-6.82823	269	219	285	254	201	196	192	392	230	2238
C1ql3	ENSMUSG00000049630,6	0.174604	2.49046	0.573516	0.593419	0.96692	-7.84498	0.0536695	2.40497	0.140484	0.894239	0.952412	-7.63183	-0.126251	2.51255	-0.381462	0.719672	0.838341	-7.63687	142	155	266	275	180	172	113	213	207	1723
C1qtnf1	ENSMUSG00000017446,14	0.153884	4.46035	2.32998	0.0722459	0.96692	-6.14753	0.102622	4.40681	2.0569	0.0999047	0.221881	-6.10862	-0.0549634	4.50405	-0.988537	0.371525	0.569442	-7.55257	742	671	727	892	751	752	684	739	667	6625
C1qtnf12	ENSMUSG00000023571,4	0.0640131	3.38535	2.55438	0.0536306	0.96692	-5.70478	0.196273	3.42344	1.89995	0.121109	0.262804	-6.19165	0.128665	3.47612	1.29289	0.256586	0.436623	-7.05718	346	355	345	376	362	360	318	407	371	3240
C1qtnf2	ENSMUSG00000046491,10	-0.252792	3.3314	-1.02306	0.357471	0.96692	-7.60346	-0.092661	3.3836	-0.638228	0.553829	0.763535	-7.56617	0.156562	3.27655	0.682962	0.527175	0.691061	-7.61591	433	321	380	390	361	223	321	367	277	3073
C1qtnf3	ENSMUSG00000058914,12	-0.639149	1.39548	-1.6336	0.168899	0.96692	-6.53769	0.202112	1.78862	0.342424	0.747166	0.888791	-7.4582	0.838838	1.48762	1.28399	0.259428	0.436623	-6.62341	122	79	145	102	82	44	61	246	106	987
C1qtnf4	ENSMUSG00000040794,5	-0.119321	3.08605	-1.05091	0.345787	0.96692	-7.53784	0.0951771	3.16534	1.15146	0.306032	0.541701	-7.06373	0.210734	3.12597	2.5274	0.0563463	0.201968	-5.41939	332	295	281	290	304	246	297	295	288	2628
C1qtnf6	ENSMUSG00000022440,9	-0.0171978	2.82002	-0.118937	0.910386	0.967582	-8.08817	0.274257	2.93797	1.04758	0.346891	0.595219	-7.13762	0.288202	2.94956	1.0724	0.33604	0.527591	-7.19571	214	239	278	286	241	201	197	374	257	2287
C1qtnf7	ENSMUSG00000061535,11	0.0119682	2.48368	0.0529889	0.959983	0.997947	-8.03574	0.0654038	2.47798	0.253545	0.81082	0.924432	-7.61804	0.0526698	2.50694	0.157275	0.88163	0.932622	-7.70836	178	197	194	151	188	251	146	271	147	1723
C1s1	ENSMUSG00000038521,17	0.283282	1.32928	1.77015	0.142572	0.96692	-6.35517	0.48486	1.40134	1.33286	0.244972	0.464101	-6.5396	0.198995	1.56376	0.541637	0.613008	0.760382	-7.33148	70	75	88	105	76	106	64	157	95	836
C2cd2	ENSMUSG00000045975,8	0.124786	5.30585	5.64064	0.00297363	0.655741	-2.58954	0.0667808	5.24852	2.19459	0.0834116	0.187654	-6.00985	-0.0615362	5.33171	-2.48519	0.0581168	0.201968	-5.81304	1242	1287	1354	1462	1385	1403	1292	1250	1159	11834
C2cd2l	ENSMUSG00000032120,11	0.0173417	5.65421	0.172599	0.870365	0.96692	-8.43904	-0.0644511	5.58506	-0.556853	0.603707	0.798346	-7.86477	-0.0853643	5.61428	-1.22855	0.277797	0.457781	-7.44792	1937	1632	1581	1752	1770	1690	1635	1416	1420	14833
C2cd3	ENSMUSG00000047248,20	0.0812922	4.8166	1.37435	0.233044	0.96692	-7.40344	-0.0118127	4.74191	-0.1588	0.880582	0.946587	-7.95089	-0.0965808	4.80304	-1.2022	0.286939	0.468668	-7.36954	888	924	998	1109	958	923	796	957	789	8342
C2cd5	ENSMUSG00000030279,15	-0.0044118	5.7553	-0.0487872	0.963153	0.998181	-8.46635	-0.0696507	5.69435	-0.741888	0.494379	0.712481	-7.74107	-0.0688214	5.71309	-1.19584	0.289187	0.471529	-7.49717	1633	2038	1894	1843	1899	1808	1714	1558	1538	15925
C3	ENSMUSG00000024164,15	-0.026549	1.60968	-0.0432498	0.967332	0.998181	-7.86508	0.368049	1.78145	0.713229	0.510345	0.727112	-7.23356	0.391764	1.78203	0.623526	0.562253	0.722553	-7.32873	163	68	105	217	89	56	92	224	90	1104
C330007P06Rik	ENSMUSG00000006423,15	-0.0128137	4.65362	-0.098471	0.92574	0.976664	-8.34203	0.0786573	4.67046	0.602921	0.575133	0.780955	-7.74617	0.0883961	4.6853	1.33523	0.243461	0.422879	-7.20135	711	945	956	845	838	896	872	888	735	7686
C330018D20Rik	ENSMUSG00000024592,15	0.00247934	2.64553	0.00777977	0.994122	0.998181	-8.06668	0.0760524	2.65408	0.253798	0.810636	0.924369	-7.6492	0.0702701	2.67692	0.51595	0.629482	0.773345	-7.60411	136	274	259	227	178	244	192	227	196	1933
C3ar1	ENSMUSG00000040552,8	-0.0451869	1.59927	-0.445465	0.676334	0.96692	-7.74579	0.0801756	1.63457	0.317348	0.764918	0.900614	-7.43789	0.121898	1.63229	0.479038	0.653596	0.792062	-7.38457	94	107	114	115	103	89	72	135	105	934
C430049B03Rik	ENSMUSG00000087365,7	-0.257437	1.35521	-0.92602	0.400808	0.96692	-7.33372	0.120725	1.51823	0.373427	0.725469	0.873611	-7.39209	0.374612	1.40811	0.973654	0.378141	0.57594	-6.94298	81	91	117	115	77	57	65	141	91	835
C530005A16Rik	ENSMUSG00000085408,1	-0.0654916	2.1711	-0.258668	0.80716	0.96692	-7.93825	-0.0737289	2.13664	-0.422682	0.691613	0.853037	-7.48783	-0.0110976	2.12733	-0.054239	0.958998	0.97563	-7.63488	122	184	171	118	175	166	148	130	129	1343
C530008M17Rik	ENSMUSG00000036377,18	0.000219881	7.409	0.00376242	0.997157	0.998344	-8.6367	-0.123843	7.31877	-1.1241	0.31636	0.555577	-7.51696	-0.127904	7.33972	-1.18345	0.293611	0.477312	-7.70944	6105	5496	5828	5773	5759	5959	5482	4336	4790	49528
C77080	ENSMUSG00000050390,12	0.0183628	5.62614	0.246974	0.81566	0.96692	-8.41724	-0.0206982	5.57872	-0.270912	0.798228	0.917999	-8.00251	-0.0428213	5.60824	-0.960916	0.383881	0.581379	-7.72941	1829	1597	1613	1844	1659	1617	1558	1481	1472	14670
C78859	ENSMUSG00000110710,1	-0.0354394	3.64531	-0.089172	0.932729	0.980934	-8.21806	-0.111738	3.57982	-0.284063	0.78874	0.913314	-7.78201	-0.0802506	3.58258	-0.645083	0.549356	0.711133	-7.70039	262	707	436	485	358	437	399	342	354	3780
C87436	ENSMUSG00000046679,16	-0.0576331	4.03935	-0.627701	0.560288	0.96692	-8.0443	-0.116747	3.98135	-1.57952	0.180288	0.371391	-6.67072	-0.0626935	3.97384	-0.953708	0.38716	0.584966	-7.50525	510	588	625	532	585	542	485	483	473	4823
C9orf72	ENSMUSG00000028300,14	0.0854543	6.29847	0.580386	0.589151	0.96692	-8.32614	0.0893733	6.27185	0.645653	0.549415	0.760398	-7.86586	0.000285884	6.33601	0.00294693	0.997771	0.998599	-8.3322	2134	2882	2886	2592	2836	2928	2724	2400	2465	23847
Caap1	ENSMUSG00000028578,8	-0.0664044	2.74836	-0.277238	0.793724	0.96692	-8.03802	0.0394671	2.77173	0.185695	0.860617	0.935918	-7.68719	0.102972	2.7612	0.873564	0.425186	0.621381	-7.35079	169	270	281	200	227	251	232	223	203	2056
Cab39	ENSMUSG00000036707,16	0.0303055	7.52533	0.262387	0.804463	0.96692	-8.60665	0.0456683	7.50447	0.393777	0.711387	0.86514	-8.11832	0.0117672	7.54082	0.152891	0.884899	0.933643	-8.46247	5271	6674	6857	6238	6222	6713	6397	5665	5514	55551
Cab39l	ENSMUSG00000021981,10	0.161623	6.26465	0.730836	0.500685	0.96692	-8.21285	0.150904	6.23071	0.719988	0.506546	0.723496	-7.80622	-0.0143471	6.33307	-0.163111	0.877284	0.930223	-8.31571	1802	2969	2856	2621	2745	3019	2611	2458	2458	23539
Cabin1	ENSMUSG00000020196,10	0.0947916	5.69306	1.49715	0.200122	0.96692	-7.35032	0.0315205	5.63351	0.590209	0.582932	0.786468	-7.84759	-0.0669927	5.70132	-1.28279	0.259813	0.436623	-7.39737	1782	1710	1641	1952	1873	1684	1587	1604	1579	15412
Cables1	ENSMUSG00000040957,15	-0.223116	2.34464	-1.49937	0.199569	0.96692	-6.89835	0.0789233	2.46531	0.389509	0.71433	0.866553	-7.56391	0.300005	2.37408	1.86576	0.125476	0.252683	-6.11883	225	169	172	164	148	171	183	224	140	1596
Cables2	ENSMUSG00000038990,14	0.0941111	4.94756	1.42745	0.218209	0.96692	-7.35465	-0.000306385	4.87237	-0.00431584	0.996738	0.998393	-7.97939	-0.0981302	4.93995	-2.27484	0.0760175	0.201968	-6.04171	1025	1085	954	1126	1106	1048	926	925	932	9127
Cabp1	ENSMUSG00000029544,16	-0.178557	4.50554	-0.720932	0.506207	0.96692	-8.03081	-0.117418	4.50766	-0.445759	0.676027	0.845173	-7.82314	0.0577886	4.43846	0.644068	0.549959	0.711698	-7.84039	1169	698	689	754	720	721	801	665	620	6837
Cacfd1	ENSMUSG00000015488,14	0.127566	5.17215	1.82729	0.132845	0.96692	-6.87917	0.0645771	5.11239	0.928664	0.399325	0.65463	-7.52231	-0.0665595	5.19708	-2.5872	0.0516156	0.201968	-5.66341	1055	1260	1229	1314	1272	1291	1112	1158	1093	10784
Cachd1	ENSMUSG00000028532,14	-0.0164695	4.90152	-0.165583	0.875574	0.96692	-8.3592	-0.116351	4.82308	-1.09053	0.329453	0.571741	-7.33111	-0.103106	4.83529	-1.6255	0.169396	0.325735	-6.86813	1154	930	1008	1086	943	1032	861	957	774	8745
Cacna1a	ENSMUSG00000034656,18	-0.136232	6.50631	-1.41224	0.222362	0.96692	-7.53731	-0.137878	6.47751	-0.945187	0.391668	0.64815	-7.62949	-0.00556786	6.43003	-0.0412047	0.968844	0.981848	-8.34273	3532	3274	2983	2936	3152	2841	3064	2321	2743	26846
Cacna1b	ENSMUSG00000004113,18	0.0551774	7.83209	0.585576	0.58594	0.96692	-8.47711	-0.0275892	7.76231	-0.212911	0.840536	0.933868	-8.20398	-0.0864672	7.81084	-0.577388	0.590513	0.745659	-8.31216	7868	7702	7345	7516	8778	7666	8041	5964	6599	67479
Cacna1c	ENSMUSG00000051331,15	0.0762262	5.93	1.33388	0.244994	0.96692	-7.57065	-0.02176	5.85266	-0.309906	0.770219	0.903831	-8.01379	-0.101533	5.91159	-1.45009	0.210992	0.391048	-7.22603	1999	2126	1962	2117	2136	2188	1979	1739	1743	17989
Cacna1d	ENSMUSG00000015968,18	-0.0396959	3.93675	-0.439636	0.680252	0.96692	-8.1463	-0.0874664	3.884	-0.766481	0.480969	0.699954	-7.53397	-0.0509031	3.88481	-0.460129	0.666143	0.800399	-7.86914	555	546	491	513	556	486	528	444	397	4516
Cacna1e	ENSMUSG00000004110,17	-0.118624	3.93114	-1.08805	0.330725	0.96692	-7.61961	-0.164545	3.87894	-2.46257	0.0615292	0.142201	-5.52127	-0.0489652	3.84118	-0.388427	0.714851	0.835162	-7.89739	523	555	549	446	540	525	491	430	403	4462
Cacna1g	ENSMUSG00000020866,17	-0.168272	3.15121	-0.690874	0.52323	0.96692	-7.87386	-0.10168	3.15606	-0.250872	0.812764	0.925737	-7.73157	0.0640787	3.09088	0.159041	0.880315	0.932131	-7.83319	402	261	317	370	284	224	181	470	236	2745
Cacna1h	ENSMUSG00000024112,16	-0.00588325	6.5194	-0.0561175	0.957624	0.996468	-8.54497	-0.124667	6.43197	-1.01007	0.362763	0.615817	-7.56176	-0.122571	6.44958	-1.21234	0.283389	0.464121	-7.5705	3517	3025	2910	3173	3334	2924	2884	2392	2607	26766
Cacna1s	ENSMUSG00000026407,17	-1.16777	-0.0987649	-2.30186	0.0746925	0.96692	-5.34503	-0.106543	0.405182	-0.108478	0.918202	0.9585	-7.23896	1.05879	-0.158005	0.985127	0.373032	0.571011	-6.5428	34	37	84	29	24	13	11	121	47	400
Cacna2d1	ENSMUSG00000040118,15	0.124031	7.96549	0.518076	0.628549	0.96692	-8.53274	0.0512944	7.90006	0.237338	0.822632	0.931565	-8.2081	-0.0763385	7.98398	-0.461698	0.665097	0.79984	-8.40091	6035	9103	9934	7839	8741	10485	8883	7191	7166	75377
Cacna2d2	ENSMUSG00000010066,15	0.0205458	7.23456	0.206063	0.845624	0.96692	-8.59351	-0.100397	7.14616	-0.5702	0.59534	0.793497	-7.99095	-0.124988	7.17706	-0.790145	0.467823	0.64434	-8.0779	5740	4851	4786	5191	5438	4985	5126	3591	4427	44135
Cacna2d3	ENSMUSG00000021991,9	-0.0477155	4.85528	-0.905526	0.410493	0.96692	-7.91125	-0.120597	4.79078	-1.4015	0.225001	0.440197	-6.97671	-0.0765629	4.78731	-0.92608	0.399945	0.597884	-7.65351	1053	966	998	1063	948	922	951	802	779	8482
Cacnb1	ENSMUSG00000020882,17	-0.0272711	6.04885	-0.291282	0.783618	0.96692	-8.4472	-0.101111	5.98399	-1.01678	0.359878	0.612005	-7.51601	-0.0775245	5.99066	-1.46618	0.206792	0.38478	-7.21646	2546	2222	2104	2404	2236	2114	2051	1879	1883	19439
Cacnb2	ENSMUSG00000057914,15	-0.16992	2.06448	-1.10603	0.323641	0.96692	-7.29791	-0.204997	2.01928	-1.91318	0.119151	0.259832	-5.93844	-0.039052	1.95517	-0.299606	0.77741	0.882101	-7.54254	130	155	171	148	111	149	127	116	115	1222
Cacnb3	ENSMUSG00000003352,14	-0.017477	7.30021	-0.203098	0.847808	0.96692	-8.60083	-0.075606	7.24317	-0.698241	0.518839	0.734449	-7.90807	-0.0619111	7.25493	-0.71232	0.510413	0.676077	-8.15055	5888	5393	5006	5498	5571	5061	5070	4313	4677	46477
Cacnb4	ENSMUSG00000017412,15	-0.0956764	5.98158	-0.4815	0.652377	0.96692	-8.35361	-0.00393283	5.9987	-0.0199036	0.984957	0.993082	-8.08442	0.0880303	5.97265	0.539955	0.614078	0.760973	-8.11543	1730	2508	2553	1843	2214	2262	2341	1783	1986	19220
Cacng1	ENSMUSG00000020722,5	-1.34784	-0.874172	-1.31673	0.250234	0.96692	-6.41065	0.621159	0.0804973	0.459912	0.66656	0.839299	-7.05153	1.96753	-0.57289	1.46605	0.206825	0.384829	-5.88334	49	8	62	16	8	11	11	161	38	364
Cacng2	ENSMUSG00000019146,2	-0.42937	2.89088	-2.65835	0.0493767	0.96692	-5.50845	-0.348588	2.90199	-2.19416	0.0845981	0.190085	-5.72818	0.0778819	2.70746	0.554297	0.604984	0.755406	-7.58724	345	278	264	230	187	243	238	221	174	2180
Cacng3	ENSMUSG00000066189,9	0.113275	2.39105	0.681654	0.528531	0.96692	-7.75075	0.06166	2.33629	0.39185	0.712715	0.86581	-7.5396	-0.054669	2.41419	-0.687146	0.524763	0.688899	-7.42936	141	210	171	183	176	202	175	166	149	1573
Cacng4	ENSMUSG00000020723,3	0.0146364	5.24403	0.245574	0.81668	0.96692	-8.37685	-0.0736876	5.17206	-1.3492	0.240069	0.456496	-7.07615	-0.0922297	5.19984	-1.13149	0.312836	0.500343	-7.50087	1256	1295	1313	1435	1177	1318	1190	1062	1092	11138
Cacng5	ENSMUSG00000040373,12	0.193898	4.93124	1.29754	0.25622	0.96692	-7.50593	0.0804377	4.84652	0.721652	0.505615	0.722535	-7.67679	-0.117494	4.96451	-0.737125	0.496546	0.663257	-7.84362	870	992	1070	1144	937	1307	1020	850	950	9140
Cacng7	ENSMUSG00000069806,5	-0.0190591	5.31808	-0.163458	0.877154	0.96692	-8.40514	-0.0463217	5.27623	-0.383983	0.718148	0.868641	-7.93031	-0.0307243	5.28698	-0.582186	0.587533	0.74308	-8.0004	1580	1326	1232	1432	1376	1272	1305	1204	1121	11848
Cactin	ENSMUSG00000034889,8	-0.197324	3.96813	-0.83655	0.44447	0.96692	-7.86862	-0.23347	3.92259	-1.00844	0.363469	0.616751	-7.3156	-0.0401829	3.84349	-0.530366	0.620205	0.766329	-7.82221	786	491	486	567	490	451	455	435	438	4599
Cacul1	ENSMUSG00000033417,16	0.131312	6.45727	0.657979	0.542312	0.96692	-8.28841	0.086096	6.40588	0.48369	0.650816	0.830199	-7.98133	-0.0487216	6.49313	-0.44237	0.678045	0.809062	-8.23501	2186	3254	3309	2919	3039	3542	2980	2715	2623	26567
Cacybp	ENSMUSG00000014226,10	-0.0903387	7.04352	-1.49025	0.201844	0.96692	-7.49747	-0.0209051	7.04956	-0.234487	0.824715	0.932972	-8.14101	0.0660533	7.02538	0.707495	0.513142	0.678629	-8.12718	4715	4368	4877	4298	4299	4565	4765	4054	3745	39686
Cad	ENSMUSG00000013629,16	-0.0406488	5.01641	-0.466434	0.662336	0.96692	-8.25903	-0.014792	5.00174	-0.158645	0.880697	0.946623	-7.9769	0.0217619	5.00191	0.22886	0.828705	0.916155	-8.12938	1180	1023	1167	1185	1133	975	951	1016	1066	9696
Cadm1	ENSMUSG00000032076,19	0.0619451	7.41046	0.517193	0.629118	0.96692	-8.47842	-0.0486902	7.32698	-0.354143	0.738931	0.883381	-8.12155	-0.114713	7.37923	-1.08672	0.330285	0.520938	-7.81848	4791	6060	6330	5723	6019	6157	5198	4570	5277	50125
Cadm2	ENSMUSG00000064115,13	-0.00532249	6.91793	-0.0255854	0.98067	0.998181	-8.58703	0.035311	6.90923	0.157317	0.881686	0.947088	-8.14769	0.0371669	6.92831	0.213298	0.840132	0.916155	-8.37676	3133	4627	4877	3721	4155	4597	4774	3468	3463	36815
Cadm3	ENSMUSG00000005338,13	0.0567288	8.57408	0.888335	0.418762	0.96692	-8.30733	-0.0710863	8.48215	-0.769678	0.479246	0.698575	-7.94704	-0.131527	8.53102	-1.83342	0.130628	0.261662	-7.05248	13592	12750	12008	13825	13348	12832	12021	10333	10879	111588
Cadm4	ENSMUSG00000054793,8	-0.0103619	5.86383	-0.0468421	0.964621	0.998181	-8.47781	-0.0697475	5.80659	-0.329929	0.75599	0.894524	-8.00198	-0.0633136	5.82129	-0.751504	0.488632	0.655811	-7.94425	2650	1599	1880	2314	1888	1800	1732	1736	1724	17323
Cadps	ENSMUSG00000054423,14	0.0505082	8.71409	0.786527	0.470447	0.96692	-8.41087	0.0247929	8.67273	0.26144	0.805087	0.921432	-8.2589	-0.0293216	8.71902	-0.280057	0.791467	0.891471	-8.56203	13297	14640	14380	14092	14985	14923	14913	12081	12318	125629
Cadps2	ENSMUSG00000017978,18	-0.0910875	3.89596	-2.29422	0.0753725	0.96692	-6.12499	-0.0806109	3.87231	-1.03222	0.353315	0.603545	-7.28612	0.00734168	3.84763	0.0895278	0.932391	0.957966	-7.98394	532	517	524	492	487	504	510	452	397	4415
Cage1	ENSMUSG00000044566,15	0.176859	1.93453	1.29459	0.257151	0.96692	-7.06292	-0.0333974	1.80034	-0.30829	0.771372	0.904323	-7.47332	-0.213649	1.91059	-1.54867	0.18651	0.353031	-6.41313	109	134	125	127	159	133	122	102	103	1114
Calb1	ENSMUSG00000028222,2	-0.203358	4.53492	-1.21456	0.283677	0.96692	-7.55543	0.0282604	4.62109	0.280512	0.791298	0.914683	-7.90633	0.22886	4.54135	1.46263	0.207711	0.386063	-7.02859	752	848	958	635	736	871	848	834	689	7171
Calb2	ENSMUSG00000003657,9	-0.231228	1.66758	-0.649251	0.547454	0.96692	-7.63204	-0.976432	1.26572	-3.70171	0.0163259	0.129487	-3.57641	-0.748096	1.16921	-2.063	0.0983357	0.205841	-5.56967	145	122	91	105	144	66	68	53	43	837
Calca	ENSMUSG00000030669,13	0.0517171	8.17546	0.461363	0.665708	0.96692	-8.58548	0.207964	8.22454	2.77364	0.0430986	0.129487	-5.51938	0.153028	8.27179	1.364	0.234907	0.410762	-7.60976	8952	9637	10565	9247	9929	11220	11108	10480	9078	90216
Calcb	ENSMUSG00000030666,11	0.129722	4.52247	0.715961	0.508995	0.96692	-8.03672	0.198648	4.52762	1.59529	0.176779	0.365004	-6.71301	0.0659825	4.61429	0.487063	0.64831	0.788135	-7.96665	618	837	814	719	821	950	818	817	717	7111
Calcoco1	ENSMUSG00000023055,10	-0.107348	4.64434	-0.820885	0.452484	0.96692	-7.96384	0.00756056	4.67332	0.0530626	0.959916	0.980916	-7.95747	0.111936	4.63957	0.913074	0.406081	0.60252	-7.6453	1018	827	828	946	819	726	840	936	675	7615
Calcrl	ENSMUSG00000059588,13	0.320283	4.43985	1.43379	0.216498	0.96692	-7.28872	0.265309	4.38382	0.911929	0.407204	0.662967	-7.46356	-0.0580268	4.56493	-0.290195	0.784166	0.886431	-8.04908	478	722	844	949	758	799	598	987	645	6780
Cald1	ENSMUSG00000029761,16	0.0830781	7.56774	1.35206	0.239556	0.96692	-7.71566	0.0551219	7.52519	0.727342	0.502437	0.71973	-7.90808	-0.0311062	7.5875	-0.340391	0.748404	0.860485	-8.4125	6067	6290	6541	6952	6105	7077	5719	6851	5372	56974
Calhm2	ENSMUSG00000033033,10	0.0563419	0.903701	0.419375	0.693964	0.96692	-7.61028	0.257561	0.975059	0.592649	0.581429	0.785526	-7.15964	0.199331	1.02276	0.450279	0.672731	0.805334	-7.25203	62	58	67	79	54	64	42	126	58	610
Calhm5	ENSMUSG00000049872,8	0.0314805	3.2166	0.395044	0.710611	0.96692	-8.06719	0.130549	3.23746	0.98978	0.371604	0.626209	-7.24281	0.0959488	3.27436	0.935093	0.395737	0.593281	-7.39904	279	312	354	331	316	319	279	371	294	2855
Calm1	ENSMUSG00000001175,15	0.0263143	11.1308	0.26887	0.799769	0.96692	-8.94814	0.0186686	11.0985	0.174392	0.868993	0.9412	-8.44386	-0.0113909	11.1328	-0.140863	0.893878	0.939061	-8.84302	65969	81740	81043	75431	78677	78850	76941	66318	67065	672034
Calm2	ENSMUSG00000036438,14	-0.169321	10.6073	-0.87487	0.425331	0.96692	-8.51175	-0.0823725	10.6222	-0.338004	0.750282	0.890714	-8.36371	0.0839183	10.558	0.51913	0.627428	0.771796	-8.64	73346	50308	48933	50148	52851	48432	62083	44832	41049	471982
Calm3	ENSMUSG00000019370,10	-0.0606506	9.79185	-0.345614	0.745004	0.96692	-8.79493	-0.0922609	9.74799	-0.500519	0.639799	0.822302	-8.22684	-0.0349644	9.73786	-0.490931	0.645771	0.786099	-8.57399	39269	27860	27059	31670	29945	27791	29313	25492	24582	262981
Calml4	ENSMUSG00000032246,14	0.110454	3.07421	0.395669	0.71018	0.96692	-8.04464	0.162615	3.07044	0.504631	0.637123	0.820401	-7.60629	0.0501452	3.14472	0.258488	0.807084	0.901323	-7.81904	402	244	216	332	313	258	298	356	208	2627
Caln1	ENSMUSG00000060371,12	0.0523431	5.28404	0.59835	0.578083	0.96692	-8.20765	-0.161773	5.14891	-2.83405	0.0402895	0.129487	-5.18492	-0.217885	5.19577	-2.14631	0.0888146	0.201968	-6.24365	1307	1322	1291	1383	1503	1211	1127	1014	1050	11208
Calr	ENSMUSG00000003814,8	-0.189558	9.13706	-1.45029	0.212111	0.96692	-7.75063	-0.14666	9.13079	-1.20389	0.287087	0.515517	-7.56631	0.0391656	9.05616	0.534751	0.617399	0.764003	-8.47704	23943	18308	19789	20555	17280	16627	17598	16497	16577	167174
Calu	ENSMUSG00000029767,16	0.056168	7.97791	0.862204	0.431584	0.96692	-8.27322	0.0554589	7.94943	0.467606	0.661443	0.836357	-8.11597	-0.00403429	7.99792	-0.0320109	0.975792	0.986602	-8.52856	8331	8104	8929	10008	8304	8241	7081	9651	7446	76095
Caly	ENSMUSG00000025468,15	-0.118912	5.02655	-0.589807	0.58333	0.96692	-8.18533	-0.110296	5.00257	-0.514858	0.630496	0.815753	-7.83534	0.00514819	4.96335	0.067401	0.949065	0.969126	-8.15298	1526	1055	970	1087	1065	1064	1098	928	915	9708
Camk1	ENSMUSG00000030272,15	-0.0770406	5.37418	-0.456662	0.66884	0.96692	-8.3031	-0.0443185	5.36215	-0.260941	0.80545	0.921637	-7.98556	0.0294392	5.34393	0.635915	0.554817	0.716181	-7.9712	1823	1337	1264	1414	1423	1318	1367	1309	1179	12434
Camk1d	ENSMUSG00000039145,16	0.0448315	6.69432	0.420933	0.692905	0.96692	-8.4588	-0.0551991	6.61588	-0.500388	0.639884	0.822374	-7.98968	-0.103696	6.65945	-1.20056	0.287517	0.469413	-7.60926	3020	3818	3660	3469	3611	3750	3317	2876	2972	30493
Camk1g	ENSMUSG00000016179,11	0.130619	5.40704	1.65961	0.163526	0.96692	-7.11806	0.0216574	5.32456	0.227079	0.830137	0.933868	-7.99204	-0.112756	5.41057	-1.5446	0.187462	0.354577	-7.0461	1257	1520	1390	1581	1559	1431	1383	1204	1257	12582
Camk2a	ENSMUSG00000024617,16	0.0965382	6.15759	1.59199	0.177864	0.96692	-7.28155	-0.0361466	6.06322	-0.359691	0.735047	0.880713	-8.01267	-0.136413	6.13203	-1.57898	0.17956	0.342081	-7.09487	2302	2533	2249	2648	2422	2528	2349	1930	2020	20981
Camk2b	ENSMUSG00000057897,14	0.0347274	6.66094	0.312815	0.76822	0.96692	-8.50234	-0.120345	6.55558	-0.832933	0.44609	0.692601	-7.73971	-0.158967	6.59328	-1.29939	0.25453	0.436623	-7.48888	3843	3324	3120	3696	3680	3183	3256	2529	2837	29468
Camk2d	ENSMUSG00000053819,16	0.091021	7.76388	0.664026	0.538769	0.96692	-8.41535	-0.0190212	7.68045	-0.147894	0.888708	0.949776	-8.21174	-0.113691	7.74705	-1.19598	0.289138	0.471504	-7.743	6016	8084	7649	7609	7126	8404	7040	6178	6194	64300
Camk2g	ENSMUSG00000021820,18	0.0790319	8.10693	1.37494	0.232874	0.96692	-7.7417	-0.00164065	8.03832	-0.0201943	0.984737	0.993024	-8.25255	-0.0842762	8.09855	-1.16158	0.301568	0.487165	-7.821	9644	9057	8808	9721	9583	9852	9145	7880	8008	81698
Camk2n1	ENSMUSG00000046447,3	-0.18003	3.96621	-1.01881	0.359279	0.96692	-7.69535	-0.219976	3.91746	-2.23797	0.080263	0.18118	-5.81625	-0.0429563	3.84792	-0.236212	0.823322	0.912654	-7.95501	609	523	575	544	392	597	447	505	385	4577
Camk2n2	ENSMUSG00000051146,2	-0.030464	5.69146	-0.542683	0.612806	0.96692	-8.28715	-0.0210427	5.66763	-0.390764	0.713464	0.866042	-7.96354	0.00602844	5.67331	0.0904269	0.931715	0.957528	-8.2442	1731	1849	1772	1721	1715	1827	1735	1581	1489	15420
Camk4	ENSMUSG00000038128,7	-0.0225796	5.11923	-0.219766	0.835551	0.96692	-8.37055	-0.0139146	5.09482	-0.178651	0.865835	0.93937	-7.98192	0.00533511	5.10481	0.0751065	0.943255	0.965205	-8.17145	1054	1272	1275	1118	1185	1249	1120	1102	1013	10388
Camkk1	ENSMUSG00000020785,17	0.0914398	4.42481	3.26276	0.0249337	0.96692	-4.96268	-0.0372649	4.33243	-0.765285	0.481616	0.700564	-7.58738	-0.132539	4.39904	-2.30697	0.0731416	0.201968	-5.92305	701	704	726	760	765	755	621	623	646	6301
Camkk2	ENSMUSG00000029471,13	0.152633	5.84989	1.86734	0.126442	0.96692	-6.89961	0.00306592	5.74709	0.0297157	0.977543	0.99026	-8.06163	-0.153538	5.84443	-1.81271	0.134043	0.267661	-6.76185	1659	2001	1963	2063	2143	2052	1752	1590	1776	16999
Camkmt	ENSMUSG00000071037,6	0.159542	2.91753	1.46257	0.208902	0.96692	-7.04462	0.210808	2.91506	1.87011	0.125653	0.270902	-6.15306	0.0476901	3.01544	0.752228	0.488236	0.655407	-7.50898	207	268	261	300	267	255	280	258	234	2330
Camkv	ENSMUSG00000032936,13	0.0603416	4.58521	0.432703	0.684929	0.96692	-8.22821	-0.00532237	4.52447	-0.0365673	0.972368	0.987408	-7.94274	-0.0695231	4.57502	-0.962348	0.383232	0.580618	-7.58856	964	728	737	869	784	870	759	692	733	7136
Caml	ENSMUSG00000021501,4	-0.0423167	5.50766	-0.817564	0.454197	0.96692	-8.06154	-0.0111278	5.49478	-0.192347	0.855697	0.933868	-8.01667	0.0276733	5.49461	0.416934	0.69528	0.820659	-8.1226	1488	1610	1635	1521	1501	1592	1548	1388	1341	13624
Camsap1	ENSMUSG00000026933,17	0.0809761	6.7527	2.40709	0.0659763	0.96692	-6.29223	-0.0264164	6.67096	-0.303368	0.774888	0.906428	-8.08728	-0.111257	6.7322	-1.27102	0.263622	0.440245	-7.53848	3519	3686	3541	3845	3803	3763	3498	2920	3207	31782
Camsap2	ENSMUSG00000041570,14	0.051319	8.26574	0.841868	0.441774	0.96692	-8.31957	-0.00298765	8.20998	-0.0378961	0.971365	0.986968	-8.26497	-0.0577516	8.25665	-0.597356	0.578174	0.735923	-8.34945	10087	10538	10358	10272	11041	10946	10632	8942	8661	91477
Camsap3	ENSMUSG00000044433,16	0.0859285	5.85813	4.31446	0.00870359	0.96692	-3.91549	-0.0812176	5.74665	-0.730433	0.500717	0.718109	-7.75496	-0.171121	5.81026	-1.52977	0.190975	0.36023	-7.11553	1932	1914	1923	2129	2043	1978	1887	1457	1646	16909
Camta1	ENSMUSG00000014592,20	0.0200152	8.77705	0.193037	0.855232	0.96692	-8.74787	-0.0601645	8.70855	-0.403095	0.704982	0.860991	-8.20557	-0.0839962	8.73969	-0.638162	0.553475	0.714865	-8.37431	12885	16166	15809	14615	15612	15255	15310	11437	12505	129594
Camta2	ENSMUSG00000040712,16	0.0226892	6.15809	0.824614	0.450325	0.96692	-8.12376	-0.0835581	6.07697	-1.31109	0.251649	0.474	-7.20332	-0.110066	6.10893	-1.81511	0.133643	0.266977	-6.79199	2473	2393	2395	2568	2406	2433	2212	1968	2061	20909
Cand1	ENSMUSG00000020114,12	0.114545	7.63516	1.20387	0.287405	0.96692	-7.89216	0.000945958	7.55016	0.00817306	0.993822	0.996689	-8.21471	-0.117438	7.62844	-1.51655	0.194163	0.365162	-7.35191	5622	7049	7010	7130	6990	7168	6469	5532	5863	58833
Cand2	ENSMUSG00000030319,8	-0.0770041	3.80533	-0.877078	0.424248	0.96692	-7.81137	-0.0805509	3.77561	-0.548091	0.609239	0.802442	-7.67951	-0.00700304	3.75718	-0.0477757	0.963879	0.978766	-7.97204	526	458	489	532	447	426	358	515	406	4157
Cant1	ENSMUSG00000025575,14	-0.00652715	5.10921	-0.268642	0.799675	0.96692	-8.35529	-0.0126899	5.07776	-0.547476	0.608651	0.80192	-7.82403	-0.00959756	5.09519	-0.307616	0.771643	0.878125	-8.11671	1173	1176	1195	1223	1129	1192	1112	1097	990	10287
Canx	ENSMUSG00000020368,15	0.0229506	9.13921	0.323192	0.760842	0.96692	-8.74217	-0.0360597	9.08163	-0.412382	0.698627	0.857283	-8.22784	-0.062926	9.11396	-1.12023	0.317145	0.505545	-7.97691	17042	19498	20993	20426	18808	19288	17796	16203	16917	166971
Cap1	ENSMUSG00000028656,14	0.0597031	7.73179	1.03021	0.35444	0.96692	-8.08719	0.00525563	7.67636	0.0981307	0.925973	0.962663	-8.21887	-0.0579268	7.72676	-2.42439	0.0635985	0.201968	-6.19131	7507	7067	6784	7703	7540	7096	6566	6690	6232	63185
Cap2	ENSMUSG00000021373,16	-0.288076	3.19132	-1.40909	0.223232	0.96692	-7.15211	0.0663337	3.33905	0.244204	0.817621	0.928753	-7.7617	0.351715	3.21594	1.85857	0.126603	0.254544	-6.30669	366	258	432	309	265	277	291	445	271	2914
Capg	ENSMUSG00000056737,14	-0.0459925	2.37794	-0.157128	0.881863	0.96692	-8.00298	0.110351	2.43056	0.374353	0.724826	0.873121	-7.56459	0.151484	2.42612	0.519738	0.627036	0.77145	-7.54612	221	133	199	240	167	133	132	219	192	1636
Capn1	ENSMUSG00000024942,17	-0.0930622	6.48462	-1.36133	0.236825	0.96692	-7.59563	-0.0725334	6.46685	-0.830696	0.447231	0.692601	-7.73417	0.0168267	6.44081	0.27152	0.797635	0.895304	-8.30069	3373	3166	2953	3077	2986	2860	2934	2595	2681	26625
Capn10	ENSMUSG00000026270,11	-0.0228727	4.70336	-0.221363	0.834379	0.96692	-8.32385	-0.0932861	4.64004	-0.879859	0.422653	0.676411	-7.52044	-0.0741192	4.64912	-0.919032	0.403261	0.599731	-7.6407	1005	852	842	902	940	820	826	727	744	7658
Capn11	ENSMUSG00000058626,16	0.0651589	-0.361719	0.0362771	0.972596	0.998181	-7.43615	1.03937	0.0823843	0.668382	0.536053	0.749061	-6.91211	0.972541	0.161077	0.628596	0.559203	0.719599	-6.92467	4	31	117	4	81	58	12	114	79	500
Capn15	ENSMUSG00000037326,10	0.0120283	3.8202	0.268265	0.800206	0.96692	-8.2029	-0.0918639	3.74009	-1.28704	0.259228	0.479708	-6.99213	-0.107402	3.76682	-1.87905	0.12342	0.249311	-6.38112	446	500	496	511	468	480	383	450	399	4133
Capn2	ENSMUSG00000026509,15	0.0763152	8.40995	2.2288	0.081483	0.96692	-6.68744	0.0102316	8.34874	0.20031	0.849817	0.933868	-8.25197	-0.0697865	8.40767	-1.4315	0.21595	0.391996	-7.54402	10831	11718	11414	12187	12033	11721	10900	10045	10179	101028
Capn5	ENSMUSG00000035547,14	0.212292	6.74572	3.30874	0.0244202	0.96692	-5.16969	0.08059	6.65198	1.6755	0.159971	0.333952	-6.80876	-0.135541	6.77868	-1.9196	0.117363	0.238833	-6.73855	3226	3495	3504	4315	3577	4026	3406	3194	3235	31978
Capn6	ENSMUSG00000067276,5	-0.128662	4.98875	-0.453882	0.670697	0.96692	-8.26266	0.284756	5.16679	0.520231	0.62703	0.812724	-7.84821	0.410987	5.1226	0.761492	0.48319	0.650442	-7.84515	1330	827	1326	1260	1166	767	700	2560	1103	11039
Capn7	ENSMUSG00000021893,14	0.0640932	6.73013	0.577295	0.591068	0.96692	-8.37233	0.0335261	6.68617	0.350568	0.741439	0.885151	-8.07024	-0.0339525	6.73945	-0.548493	0.608654	0.757943	-8.20437	3043	3830	3823	3559	3758	3861	3439	3383	3092	31788
Capns1	ENSMUSG00000001794,13	0.0269476	8.73806	0.220804	0.834789	0.96692	-8.7372	-0.010417	8.69126	-0.0839974	0.936601	0.968675	-8.29724	-0.0406886	8.72495	-0.740236	0.494826	0.661661	-8.29528	16920	13327	13395	16206	14350	13875	14019	13348	11872	127312
Caprin1	ENSMUSG00000027184,14	0.0594402	8.99838	1.17824	0.296526	0.96692	-8.05299	-0.00223749	8.93919	-0.0354477	0.973214	0.987833	-8.31864	-0.0652529	8.98976	-1.17965	0.294981	0.479105	-7.89906	15851	17467	18099	18376	17132	18241	16889	15304	14528	151887
Caprin2	ENSMUSG00000030309,16	0.0493097	4.34763	0.583586	0.58717	0.96692	-8.1121	0.049401	4.31893	0.515896	0.629825	0.815129	-7.76385	-0.00314158	4.36458	-0.0364847	0.972411	0.98451	-8.06961	616	736	703	709	673	750	722	642	573	6124
Capza1	ENSMUSG00000070372,11	0.172781	5.25849	1.63194	0.169247	0.96692	-7.13685	0.0997385	5.1935	0.972314	0.379358	0.63555	-7.48794	-0.0765375	5.30107	-1.66424	0.161373	0.312737	-6.882	1047	1317	1352	1373	1394	1415	1172	1267	1164	11501
Capza2	ENSMUSG00000015733,13	0.0726411	7.82465	0.356948	0.737052	0.96692	-8.60129	0.132492	7.82572	0.688636	0.524334	0.739349	-7.96178	0.0564021	7.88357	0.557086	0.603224	0.754087	-8.33375	5655	8564	8876	7519	7692	8779	8287	7494	6869	69735
Capzb	ENSMUSG00000028745,18	0.0503921	7.56527	1.02671	0.355918	0.96692	-8.0743	0.0445368	7.53403	0.773195	0.477355	0.697101	-7.87149	-0.00911334	7.57967	-0.218759	0.836117	0.916155	-8.45222	6654	6250	6182	7077	6504	6271	6126	6416	5394	56874
Car10	ENSMUSG00000056158,14	-0.247134	6.28534	-1.51049	0.19683	0.96692	-7.3954	-0.137056	6.31159	-0.598242	0.577996	0.783001	-7.90217	0.10704	6.20851	0.610806	0.569956	0.728806	-8.09863	3567	2725	2516	2411	2569	2388	3130	2202	2002	23510
Car11	ENSMUSG00000003273,14	0.0380903	5.25556	0.628331	0.55991	0.96692	-8.18387	0.040615	5.22828	0.308462	0.771249	0.904323	-7.95681	-0.000919008	5.26821	-0.00737213	0.994424	0.996543	-8.19655	1197	1377	1294	1323	1328	1331	1459	1106	1082	11497
Car13	ENSMUSG00000027555,8	0.0754304	2.58694	0.765211	0.481857	0.96692	-7.72074	0.414171	2.7248	0.793552	0.466521	0.692601	-7.34073	0.338421	2.78232	0.64755	0.547893	0.709852	-7.53992	194	197	208	251	202	185	169	528	156	2090
Car14	ENSMUSG00000038526,14	0.0115321	1.04002	0.0189774	0.985661	0.998181	-7.74485	0.246688	1.12463	0.264763	0.802679	0.920135	-7.35346	0.236918	1.14494	0.264223	0.802921	0.898148	-7.36001	136	47	53	114	77	39	46	252	35	799
Car2	ENSMUSG00000027562,12	-0.146772	3.52581	-1.14067	0.310368	0.96692	-7.5088	0.324661	3.73384	2.53482	0.0565723	0.131204	-5.41076	0.467711	3.68019	3.99064	0.0120714	0.201968	-3.76973	468	371	408	442	347	343	431	543	447	3800
Car3	ENSMUSG00000027559,5	-0.939844	4.70361	-2.1394	0.09072	0.96692	-6.41878	0.0363727	5.1632	0.0534288	0.959639	0.980778	-8.00617	0.972983	4.71443	1.65723	0.162796	0.315087	-6.80637	1115	765	2192	783	573	598	575	2386	1107	10094
Car5b	ENSMUSG00000031373,4	0.0709275	1.80281	0.535051	0.617664	0.96692	-7.73672	0.0247756	1.75307	0.150931	0.886443	0.948984	-7.50771	-0.0508134	1.80965	-0.49101	0.645719	0.786065	-7.41965	94	125	132	130	122	115	108	98	117	1041
Car8	ENSMUSG00000041261,9	-0.00363478	4.52409	-0.0203618	0.984616	0.998181	-8.33271	0.0524423	4.52326	0.326584	0.758359	0.896183	-7.87936	0.0526397	4.54323	0.426014	0.689102	0.816614	-7.98877	624	873	891	706	820	846	819	701	711	6991
Card10	ENSMUSG00000033170,14	0.105853	2.38841	1.07249	0.336965	0.96692	-7.39516	0.130417	2.37573	0.645514	0.549498	0.760493	-7.39622	0.0189359	2.44863	0.0892275	0.932617	0.958063	-7.7054	158	176	183	219	169	173	142	164	218	1602
Card11	ENSMUSG00000036526,8	-0.171902	2.17893	-0.609751	0.571128	0.96692	-7.76218	-0.19509	2.13959	-0.618189	0.565856	0.773735	-7.37103	-0.027711	2.07386	-0.108707	0.917971	0.948678	-7.61706	223	123	160	150	175	118	172	103	124	1348
Card14	ENSMUSG00000013483,14	-0.243015	0.801875	-0.666856	0.537116	0.96692	-7.43403	0.150394	0.970211	0.309899	0.770224	0.903831	-7.30638	0.391324	0.8664	0.858745	0.432531	0.62924	-6.91903	97	51	54	67	63	38	41	114	58	583
Card19	ENSMUSG00000037960,11	0.0461911	4.10676	0.400877	0.706602	0.96692	-8.18671	0.0566819	4.08347	0.428293	0.687806	0.851141	-7.785	0.00717127	4.12693	0.108722	0.91796	0.948678	-8.02687	674	545	528	619	583	598	611	546	491	5195
Card6	ENSMUSG00000041849,7	0.0677559	1.48903	0.562573	0.600256	0.96692	-7.65476	-0.102211	1.37798	-0.75291	0.488336	0.70667	-7.12229	-0.174128	1.4309	-1.02476	0.355828	0.551304	-6.89704	92	98	90	120	90	87	66	89	84	816
Carf	ENSMUSG00000026017,13	-0.019698	4.00883	-0.136374	0.897341	0.96692	-8.25946	0.00572837	3.9924	0.0380897	0.971218	0.986886	-7.88269	0.0226133	4.00382	0.287981	0.785758	0.887494	-7.96466	449	634	594	536	538	571	529	555	438	4844
Carhsp1	ENSMUSG00000008393,9	0.171931	5.77441	2.43635	0.0637563	0.96692	-6.15379	0.160282	5.74	1.69588	0.155965	0.326629	-6.7036	-0.0148587	5.84688	-0.234626	0.824482	0.913417	-8.23797	1569	1866	1865	2031	1996	1951	1713	2032	1647	16670
Carm1	ENSMUSG00000032185,15	0.0743799	6.30275	1.44104	0.214561	0.96692	-7.48186	-0.0374121	6.21904	-0.763124	0.482784	0.701712	-7.77038	-0.115568	6.27662	-1.98601	0.108108	0.223649	-6.59095	2626	2689	2571	3026	2762	2563	2253	2394	2345	23229
Carmil1	ENSMUSG00000021338,17	-0.0733868	4.86878	-1.17827	0.296515	0.96692	-7.63373	-0.0862874	4.83379	-0.836978	0.44403	0.692601	-7.57885	-0.0164101	4.81803	-0.145512	0.890405	0.936778	-8.12286	1040	1033	997	942	980	1009	1019	806	820	8646
Carmil2	ENSMUSG00000050357,9	-0.142766	5.2444	-0.980372	0.376025	0.96692	-7.88191	-0.0957838	5.23969	-0.546724	0.610105	0.802902	-7.83889	0.0434009	5.18864	0.409979	0.70003	0.82425	-8.08586	1649	1261	1211	1273	1262	1177	1352	1063	1079	11327
Carmil3	ENSMUSG00000022211,9	-0.0607729	6.71146	-0.451396	0.672359	0.96692	-8.44498	-0.113174	6.65748	-0.626408	0.560903	0.769332	-7.91239	-0.056322	6.64741	-0.387529	0.715472	0.835588	-8.28047	4114	3785	3140	3621	3725	3228	3568	2616	3117	30914
Carnmt1	ENSMUSG00000024726,10	0.0215154	1.72386	0.0919438	0.930645	0.979652	-7.88477	0.207311	1.78706	0.897067	0.414306	0.669585	-7.07802	0.183188	1.81967	1.37826	0.230774	0.405	-6.60034	80	128	135	117	99	127	121	135	98	1040
Carns1	ENSMUSG00000075289,5	-0.155707	2.14398	-1.23551	0.276497	0.96692	-7.17148	-0.179705	2.10554	-2.16725	0.0873869	0.195851	-5.62553	-0.0283756	2.04678	-0.247408	0.815147	0.906951	-7.58107	173	155	150	172	137	124	128	126	129	1294
Cars	ENSMUSG00000010755,17	-0.0336022	4.96279	-0.298557	0.778402	0.96692	-8.32882	-0.102282	4.90047	-0.875983	0.424552	0.67849	-7.55042	-0.0722475	4.90375	-1.1319	0.312677	0.500131	-7.4605	1209	1082	957	1156	1036	984	995	896	853	9168
Cars2	ENSMUSG00000056228,10	-0.012318	3.43403	-0.094333	0.928849	0.978448	-8.18769	0.0160192	3.42029	0.111759	0.915741	0.957551	-7.80154	0.0246073	3.43441	0.264342	0.802835	0.898095	-7.87342	435	330	354	388	385	335	308	373	344	3252
Cartpt	ENSMUSG00000021647,7	-0.375094	3.02954	-0.675012	0.532373	0.96692	-7.86531	-0.578186	2.89124	-1.34746	0.240588	0.457278	-6.79248	-0.201172	2.72886	-0.318193	0.764135	0.872695	-7.70954	435	239	304	127	268	438	157	338	132	2438
Casc3	ENSMUSG00000078676,9	-0.0149578	6.10026	-0.430514	0.686408	0.96692	-8.39303	-0.0840927	6.0375	-1.36653	0.234972	0.44871	-7.13494	-0.0727754	6.05068	-1.22482	0.279076	0.45894	-7.50731	2390	2370	2307	2403	2267	2353	2193	1939	1942	20164
Casc4	ENSMUSG00000060227,15	0.0188985	7.20976	0.34476	0.745605	0.96692	-8.54527	-0.0603397	7.14166	-0.697857	0.519058	0.734634	-7.90012	-0.0827706	7.17207	-0.963393	0.382759	0.580171	-7.91926	4668	5119	5302	5110	4955	5273	4972	4185	4043	43627
Casd1	ENSMUSG00000015189,12	0.130991	5.78202	0.58186	0.588237	0.96692	-8.27151	0.165193	5.77052	0.747725	0.491172	0.709204	-7.74334	0.0306582	5.85751	0.588827	0.583424	0.740604	-8.06956	1276	2053	2207	1951	1909	2070	1910	1869	1722	16967
Cask	ENSMUSG00000031012,17	0.0742841	7.32106	1.34552	0.2415	0.96692	-7.69879	0.0404837	7.27564	0.9139	0.406269	0.661975	-7.72581	-0.0372792	7.3338	-0.813912	0.455357	0.642565	-8.07625	4956	5440	5591	5527	5694	5665	5219	5038	4695	47825
Caskin1	ENSMUSG00000033597,9	-0.0229115	7.26593	-0.263926	0.803347	0.96692	-8.58028	-0.160955	7.16905	-1.18511	0.293749	0.525202	-7.43835	-0.141965	7.17803	-1.33882	0.242378	0.421428	-7.51315	5916	5081	4953	5480	5103	5132	4849	3821	4330	44665
Caskin2	ENSMUSG00000034471,12	0.229227	4.47574	1.85837	0.127848	0.96692	-6.76092	-0.00128391	4.33322	-0.0115011	0.991307	0.995719	-7.92267	-0.234723	4.46812	-1.48788	0.201256	0.376118	-6.98596	714	663	730	947	682	871	559	675	689	6530
Casp12	ENSMUSG00000025887,10	0.0778529	2.69119	0.513183	0.631707	0.96692	-7.91859	0.146373	2.69671	0.530854	0.620211	0.807563	-7.52923	0.0657967	2.75657	0.246367	0.815906	0.907503	-7.74167	180	222	246	248	192	246	160	310	202	2006
Casp2	ENSMUSG00000029863,13	0.202472	3.53137	1.17135	0.29902	0.96692	-7.47593	0.0457393	3.42571	0.218859	0.836165	0.933868	-7.78097	-0.160744	3.54758	-0.989301	0.371188	0.569083	-7.39642	290	396	433	495	377	411	284	404	360	3450
Casp3	ENSMUSG00000031628,9	0.0567664	6.44183	0.640785	0.552472	0.96692	-8.29935	0.014878	6.39233	0.168482	0.873382	0.942601	-8.10178	-0.0453074	6.44175	-0.812274	0.456207	0.642981	-7.9705	2568	3164	3035	2989	3063	3072	2878	2675	2487	25931
Casp6	ENSMUSG00000027997,9	0.0746559	2.5968	0.493653	0.644404	0.96692	-7.91342	0.14057	2.60035	0.63304	0.556927	0.76634	-7.44512	0.0632603	2.65826	0.355061	0.738084	0.852736	-7.68159	231	164	214	226	191	222	174	267	175	1864
Casp7	ENSMUSG00000025076,10	-0.108547	2.59148	-0.862499	0.431437	0.96692	-7.63728	-0.0382792	2.59884	-0.193373	0.854939	0.933868	-7.65543	0.066778	2.56528	0.384284	0.717717	0.836977	-7.64828	180	220	245	220	200	178	152	235	189	1819
Casp8	ENSMUSG00000026029,14	0.116201	2.43289	0.862681	0.431347	0.96692	-7.60818	0.0702469	2.38235	0.328253	0.757176	0.895374	-7.57501	-0.0495913	2.46084	-0.242179	0.818962	0.909663	-7.67725	164	161	209	224	190	167	132	217	168	1632
Casp8ap2	ENSMUSG00000028282,12	-0.00537195	4.6536	-0.0952128	0.928188	0.978105	-8.34241	-0.0538228	4.60099	-1.28548	0.259709	0.479708	-7.09331	-0.0520144	4.61933	-1.01193	0.361322	0.557856	-7.54588	806	881	898	850	841	894	779	753	732	7434
Casp9	ENSMUSG00000028914,13	0.10732	4.8396	0.998046	0.368246	0.96692	-7.81993	0.0604667	4.78797	0.546249	0.610407	0.803222	-7.79508	-0.0505515	4.86265	-1.06626	0.338537	0.53059	-7.52445	801	1051	992	1022	1015	1020	925	874	883	8583
Casq1	ENSMUSG00000007122,11	-1.44389	1.34421	-1.57025	0.182738	0.96692	-6.58404	0.544486	2.30807	0.428542	0.687638	0.851123	-7.51502	1.98763	1.60789	1.517	0.194053	0.364993	-6.33114	143	53	380	72	51	39	58	756	153	1705
Casq2	ENSMUSG00000027861,13	-1.00473	2.34771	-1.33609	0.244326	0.96692	-7.08242	0.572738	3.10586	0.486637	0.648879	0.828913	-7.62013	1.57678	2.62572	1.39444	0.226168	0.402938	-6.73356	229	106	609	151	105	117	111	1251	263	2942
[truncated: 11,521 more rows]
